# Supplementary material
Source: PubMed Central journal article supplement (PMC4689197)
Supplement: NIHMS743501-supplement-SI.pdf [file NIHMS743501-supplement-SI.pdf]

## Supporting Information for:

### **The Solution Structure of a Nonribosomal Peptide Synthetase Carrier Protein Loaded with its Substrate Reveals Transient, Well-defined Contacts.**

Andrew C. Goodrich<sup>†</sup>, Bradley J. Harden<sup>†</sup>, Dominique P. Frueh<sup>†,\*</sup>.

Department of Biophysics & Biophysical Chemistry, Johns Hopkins University School of Medicine, 701 Hunterian, 725 N. Wolfe Street, Baltimore, MD 21205, USA



---

## NMR structure statistics for holo-ArCP

---

### Violations (mean and s.d.)<sup>a</sup>

|                                        |               |
|----------------------------------------|---------------|
| Distance constraints (Å)               | 0.32 +/- 0.07 |
| Dihedral angle constraints (°)         | 1.88 +/- 0.41 |
| Max. dihedral angle violation (°)      | 3.12          |
| Max. distance constraint violation (Å) | 0.43          |

### R. m. s. deviations geometry<sup>c</sup>

|                  |       |
|------------------|-------|
| Bond lengths (Å) | 0.017 |
| Bond angles (°)  | 1.4   |

### Average pairwise r.m.s.d. [residues 19–88] (Å)<sup>a</sup>

|          |               |
|----------|---------------|
| Heavy    | 0.88 +/- 0.07 |
| Backbone | 0.37 +/- 0.06 |

### Ramachandran Statistics<sup>b</sup>

|                      |      |
|----------------------|------|
| Most favoured        | 92.5 |
| Additionally allowed | 7.5  |
| Generously allowed   | 0.0  |
| Disallowed           | 0.0  |

---

**Table S1:** NMR structure statistics for holo-ArCP. a from CYANA 2.1<sup>2</sup>, b from PROCHECK\_NMR<sup>3</sup> residues 17-90. c From PSVS<sup>4</sup>.

---

## NMR structure statistics for loaded-ArCP

---

### Violations (mean and s.d.)<sup>a</sup>

|                                        |               |
|----------------------------------------|---------------|
| Distance constraints (Å)               | 0.30 +/- 0.07 |
| Dihedral angle constraints (°)         | 2.81 +/- 0.27 |
| Max. dihedral angle violation (°)      | 3.38          |
| Max. distance constraint violation (Å) | 0.47          |

### R. m. s. deviations geometry<sup>c</sup>

|                  |       |
|------------------|-------|
| Bond lengths (Å) | 0.017 |
| Bond angles (°)  | 1.6   |

### Average pairwise r.m.s.d. [residues 19–88] (Å)<sup>a</sup>

|          |               |
|----------|---------------|
| Heavy    | 0.85 +/- 0.09 |
| Backbone | 0.36 +/- 0.08 |

### Ramachandran Statistics<sup>b</sup>

|                      |      |
|----------------------|------|
| Most favoured        | 89.4 |
| Additionally allowed | 10.6 |
| Generously allowed   | 0.0  |
| Disallowed           | 0.0  |

---

**Table S2:** NMR structure statistics for loaded-ArCP. a from CYANA 2.1<sup>2</sup>, b from PROCHECK\_NMR<sup>3</sup>, residues 16-89. c From PSVS<sup>4</sup>.

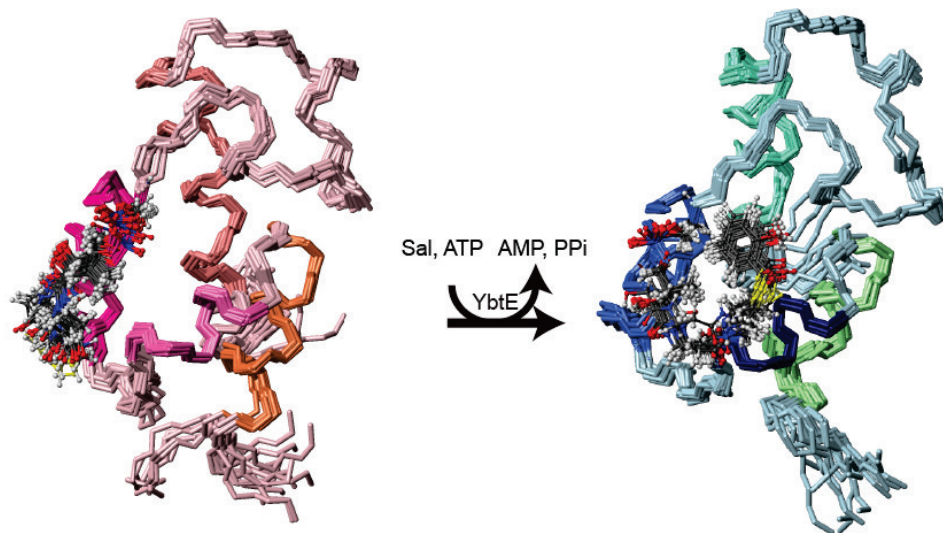

**Figure S1.** NMR bundles for holo-ArCP (left) and loaded-ArCP (blue). In holo-ArCP, alpha helices are colored as follows:  $\alpha 1$ : brown,  $\alpha 2$ :magenta,  $\alpha 3$ :pink,  $\alpha 4$ :beige. The corresponding colors for loaded-ArCP are:  $\alpha 1$ :cyan,  $\alpha 2$ :skye blue,  $\alpha 3$ :royal blue,  $\alpha 4$ :green. Alignments made with  $C^\alpha$  of residues in helices only (r.m.s.d of 0.33 for holo and 0.37 for loaded). Figure generated with molmol<sup>5</sup>. A compact fold in ArCP gives rise to a large number of NMR constraints and, hence, to high resolution structures with low root-mean-squared-standard-deviation (rmsd). Thus, the NMR structure of the holo-ArCP protein core is defined by 1636 distance constraints (20 per residues) leading to an rmsd of 0.88 Å for heavy atoms and 0.37 Å for backbone atoms (see Table S1).  $C^\alpha$  in helices align with an rmsd of 0.33 Å. This number increases to only 0.38 Å when loops are included (residues 19-89), indicating that the loops are well defined by interactions with the helical core. The protein core of loaded ArCP provides 1314 distance constraints (16 per residue) resulting in an rmsd of 0.86 Å for heavy atoms and 0.35 Å for backbone atoms (Table S2). The rmsd for  $C^\alpha$  is 0.37 Å when calculated with helices only and 0.4 Å when all residues from 19-89 are included. Thus, the NMR structures of holo- and loaded ArCP are well defined for the entire range of residues excluding N- and C-termini and lead to tight NMR ensembles. The residues masked by PP in holo-ArCP are S52, I53, M56, and L59 on  $\alpha 2$ , and L71, R72, and Y75 on loopII and  $\alpha 3$ . In loaded-ArCP, Sal and PP cover a surface involving residues L50-I53, M56, R72, Y75, A76 and I46.

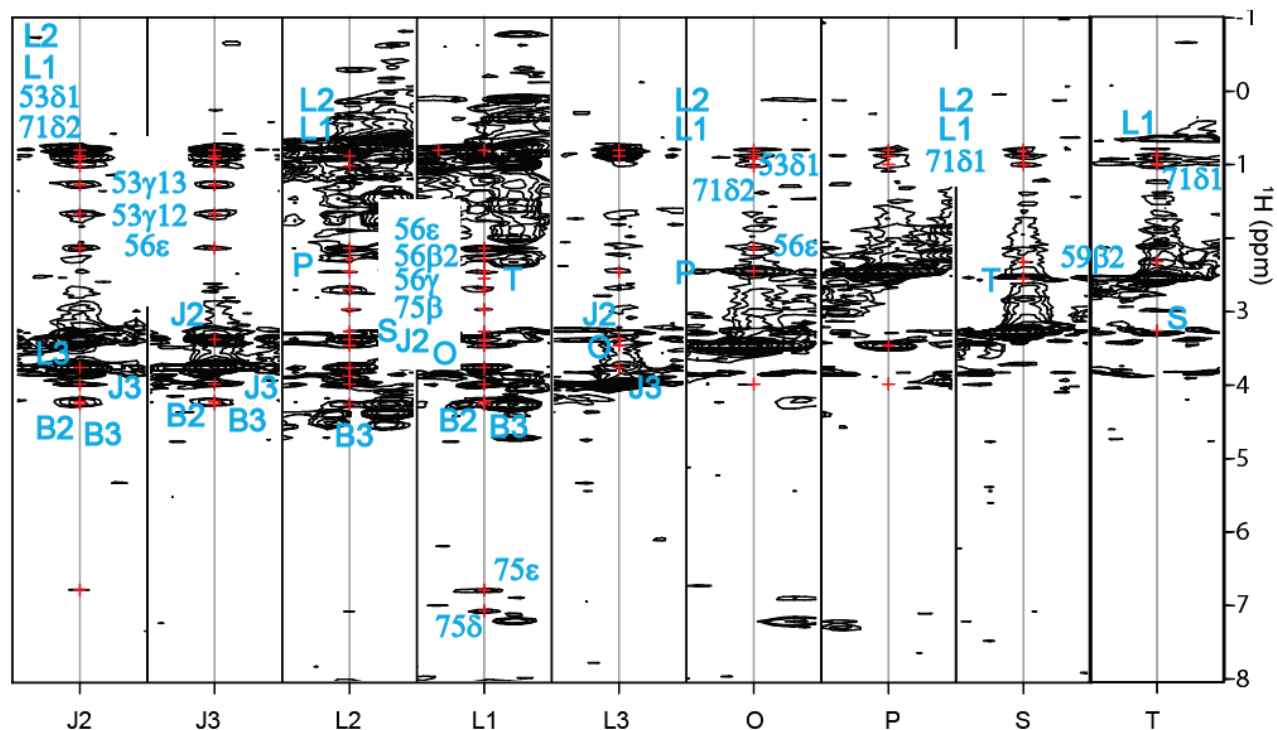

**Figure S2.** NOESY strips involving PP in holo-ArCP. The labels for PP moieties (Roman alphabet) are defined in Figure 1. Labels are positioned between two strips when the corresponding signals are observed in both. For crowded regions, the order of the labels from top to bottom refers to the nearest series of signals, again from top to bottom.

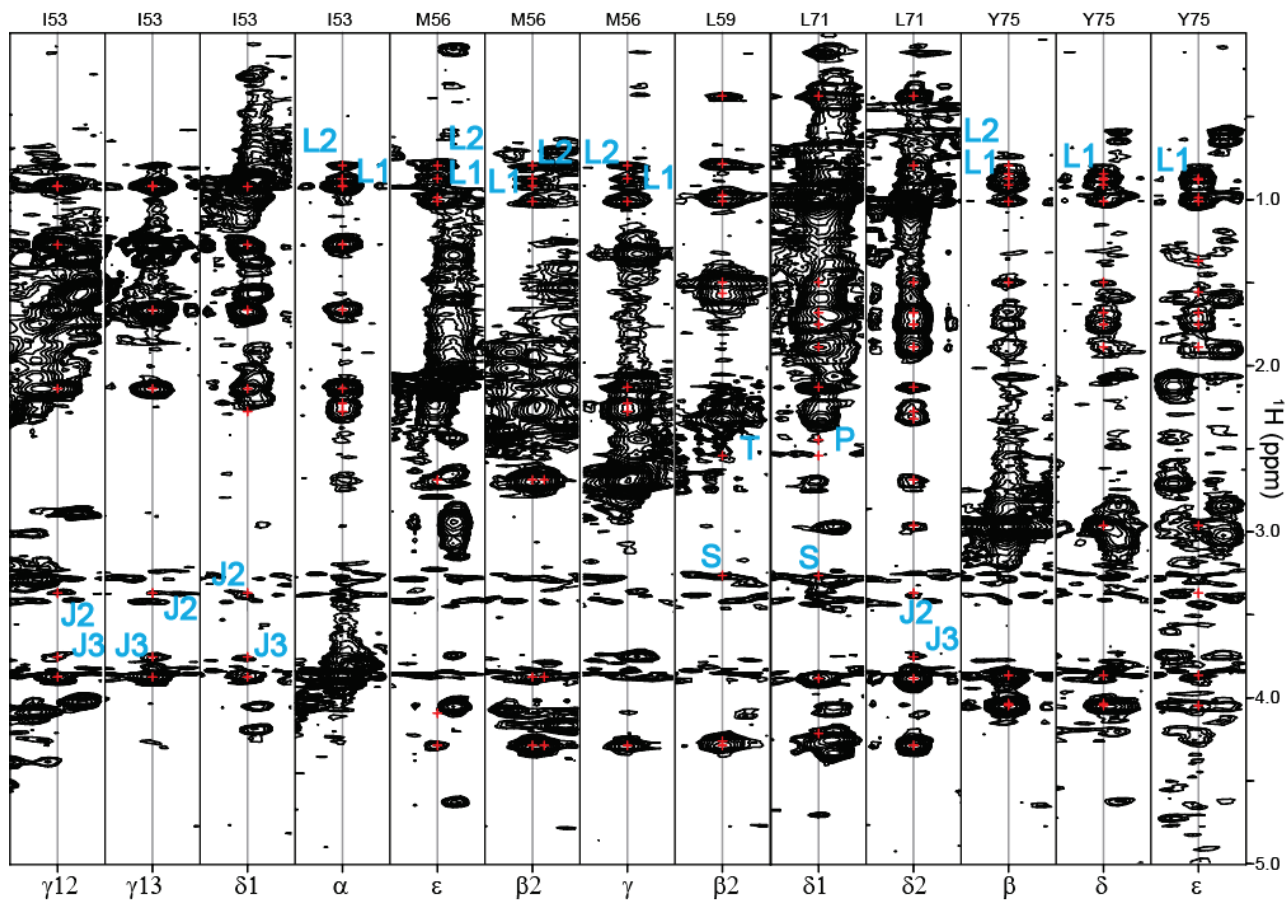

**Figure S3.** NOESY strips of residues in holo-ArCP displaying NOESY cross-peaks with PP. Unlabeled cross-peaks denote cross-peaks within the protein core. A total of 50 cross-peaks involving PP could be assigned unambiguously from peaks seen in Figures S2 and S3. They include 14 nOe's within the PP arm and 36 nOe's between the protein core and PP.

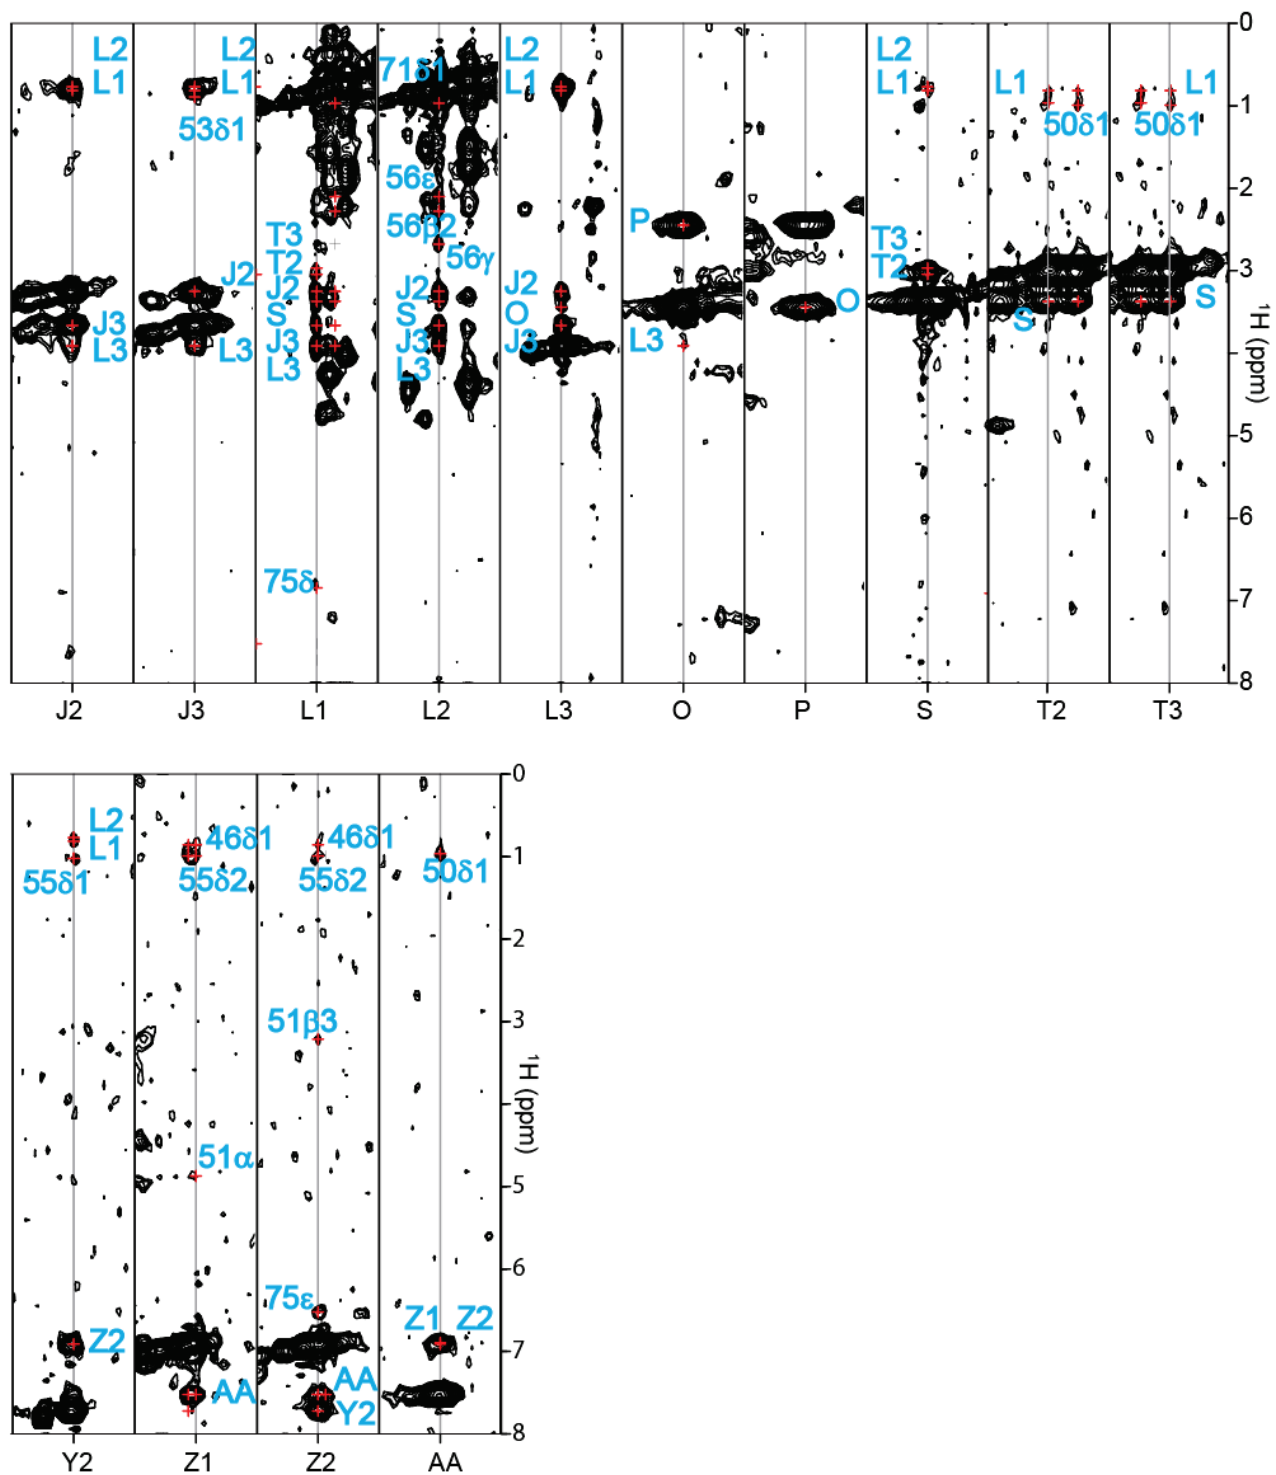

**Figure S4.** NOESY strips involving salicylate and PP in loaded-ArCP. The labels for PP moieties (Roman alphabet) are defined in Figure 1. For crowded regions, the order of the labels from top to bottom refers to the nearest series of signals, again from top to bottom.



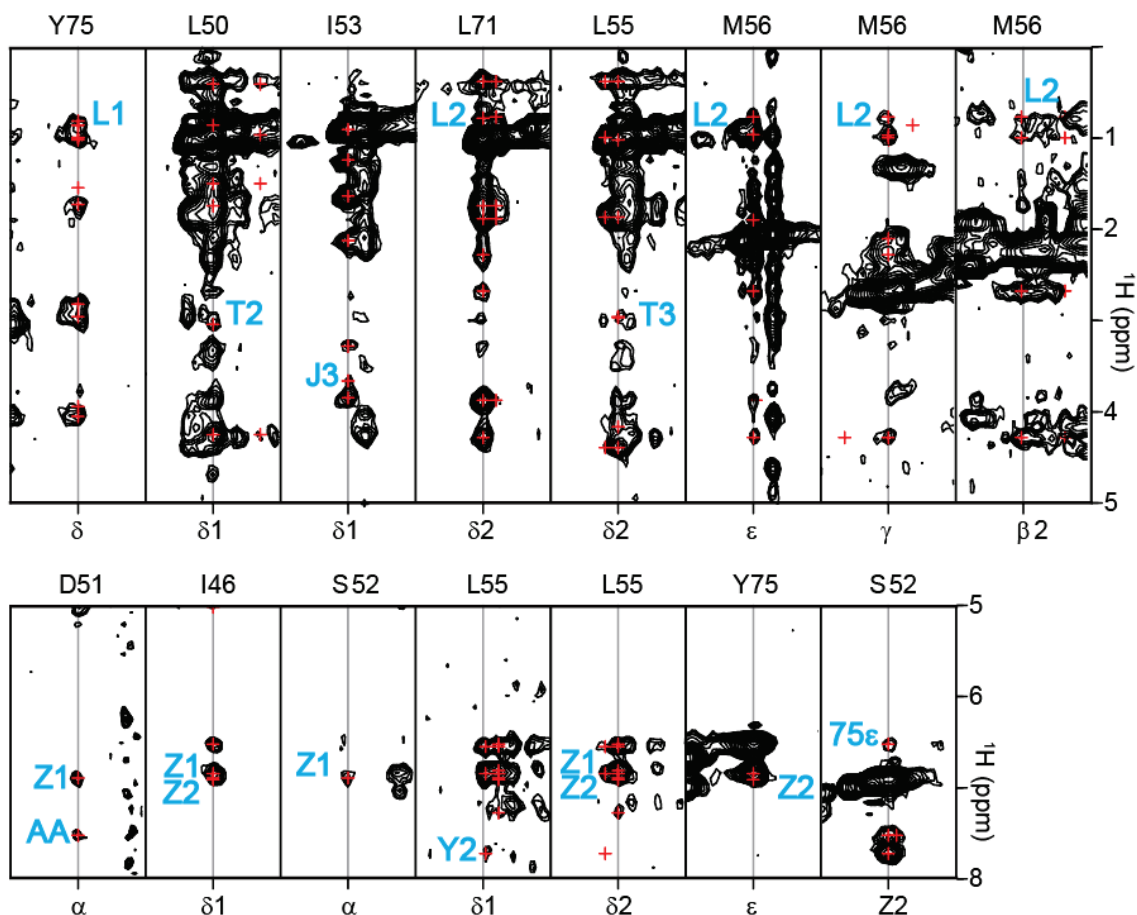

**Figure S5.** NOESY strips of residues in loaded-ArCP displaying NOESY cross-peaks with PP (top) and Sal (bottom). Unlabeled cross-peaks denote cross-peaks within the protein core. The strip of Z2 (in salicylate) is shown to confirm the assignment of a NOESY cross-peak in Y75 $\epsilon$  that overlaps with another cross-peak. 12 nOe's were observed between loaded-ArCP and Sal and 8 with PP. In addition, 9 constraints could be determined within the Sal-PP moiety.

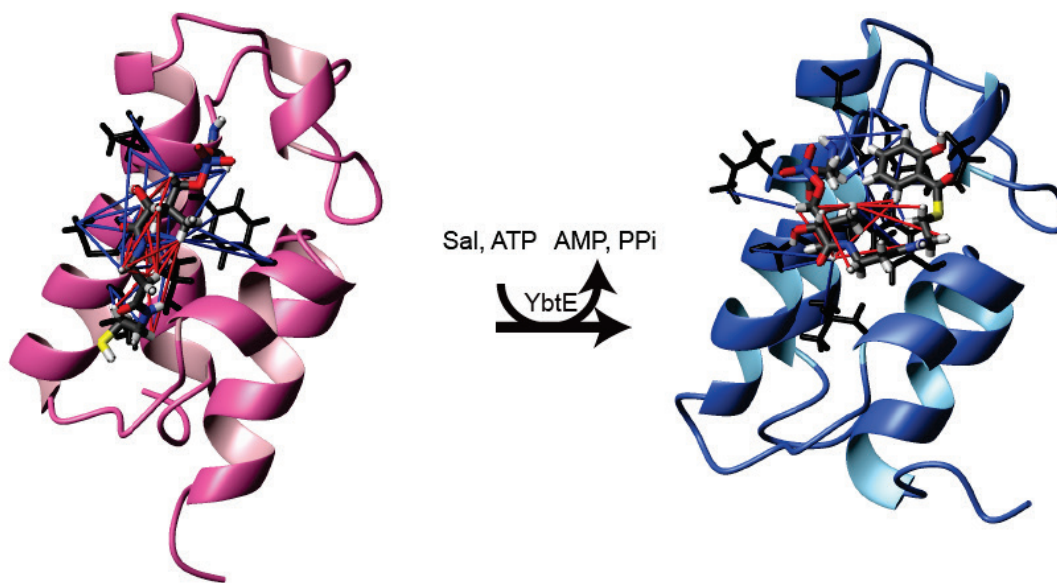

**Figure S6.** Visualization of distance constraints involving prosthetic groups in holo-ArCP (left) and loaded-ArCP (right). Lines in blue denote distances between the core protein and the prosthetic group, those in red denote distances within the prosthetic groups. Side chains of residues involved are shown in black neon. The lowest energy conformers were selected for display.

## Relaxation rates and Model-Free Parameters

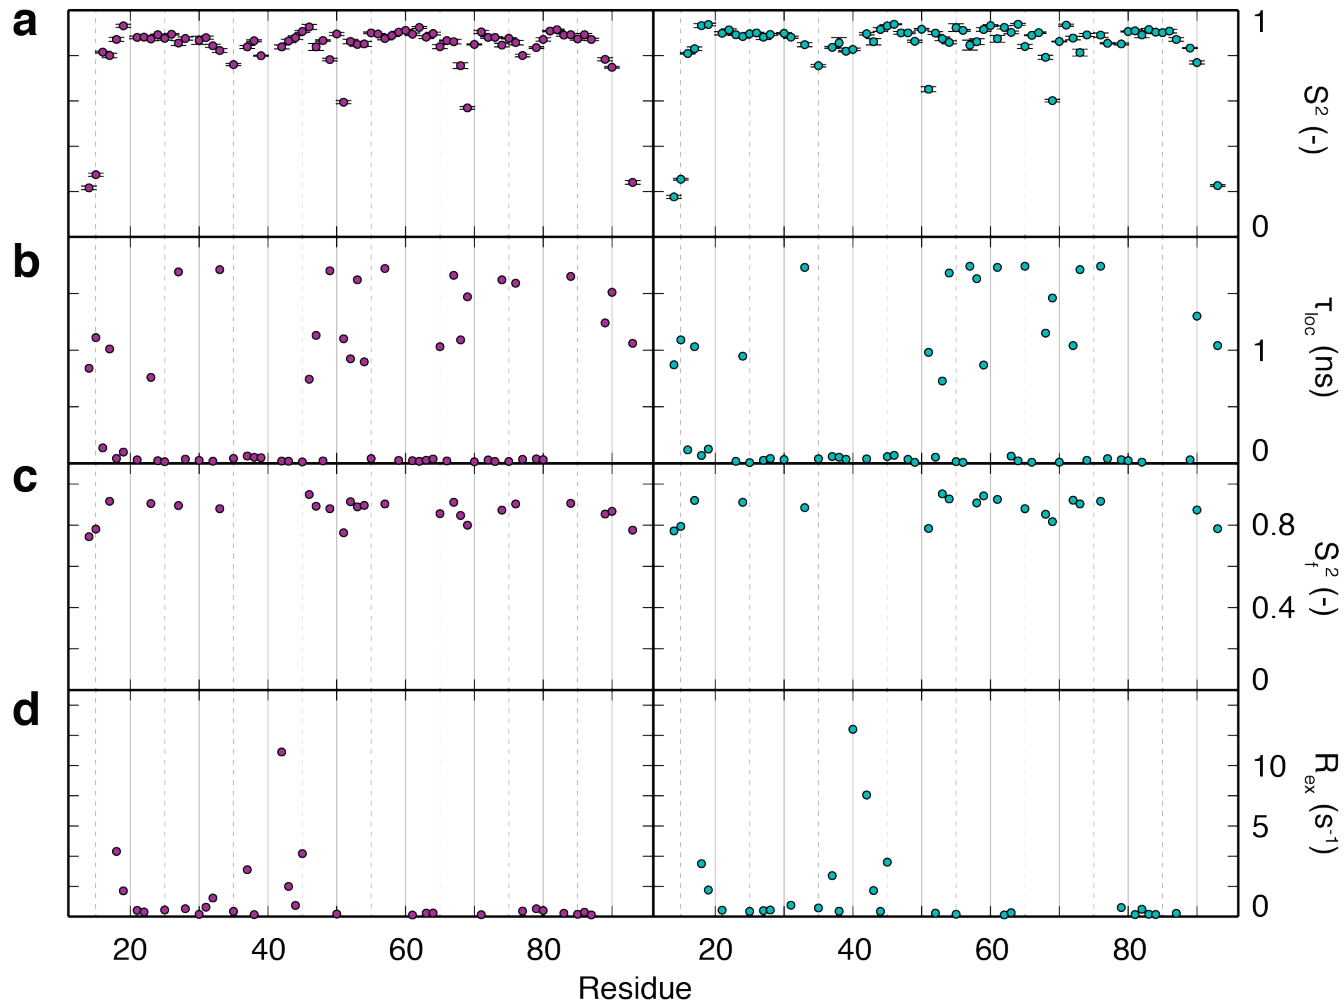

**Figure S7.** Model-free analysis of holo (left, pink) and loaded (right, cyan) ArCP. The analysis was performed using the software ROTDIF<sup>6,7</sup>. ROTDIF selects which parameters to use when fitting based on the Akaike Information Criterion. For a given residue, parameters not selected have not been plotted. (a) Overall ( $S^2$ ) or slow time-scale ( $S_s^2$ , when  $S_f^2$  is present) order parameter (b) Effective correlation time  $\tau_{loc}$  (c) Fast time scale order parameter ( $S_f^2$ ) (d) Exchange contribution to transverse relaxation ( $R_{ex}$ )

| Residue | R1    | $\sigma$ R1 | R2     | $\sigma$ R2 | NOE     | $\sigma$ NOE | S <sup>2</sup> | $\sigma$ S <sup>2</sup> | T <sub>loc</sub> | S <sub>f</sub> <sup>2</sup> | R <sub>ex</sub> |
|---------|-------|-------------|--------|-------------|---------|--------------|----------------|-------------------------|------------------|-----------------------------|-----------------|
| D14     | 1.380 | 0.016       | 2.970  | 0.046       | -0.1324 | 0.0119       | 0.216          | 0.008                   | 0.84             | 0.74                        | -               |
| N15     | 1.590 | 0.007       | 3.600  | 0.024       | 0.1854  | 0.0037       | 0.274          | 0.007                   | 1.11             | 0.78                        | -               |
| R16     | 1.890 | 0.011       | 7.090  | 0.036       | 0.5295  | 0.0073       | 0.815          | 0.004                   | 0.14             | -                           | -               |
| H17     | 1.890 | 0.010       | 7.400  | 0.034       | 0.6726  | 0.0065       | 0.800          | 0.010                   | 1.01             | 0.92                        | -               |
| A18     | 1.870 | 0.014       | 12.010 | 0.079       | 0.7287  | 0.0086       | 0.871          | 0.009                   | 0.04             | -                           | 4.31            |
| A19     | 1.980 | 0.011       | 10.040 | 0.038       | 0.7245  | 0.0132       | 0.931          | 0.007                   | 0.10             | -                           | 1.70            |
| Y21     | 1.870 | 0.007       | 8.220  | 0.036       | 0.7524  | 0.0034       | 0.880          | 0.006                   | 0.03             | -                           | 0.41            |
| Q22     | 1.840 | 0.011       | 8.150  | 0.035       | 0.7815  | 0.0058       | 0.881          | 0.007                   | -                | -                           | 0.30            |
| Q23     | 1.880 | 0.009       | 7.830  | 0.034       | 0.7566  | 0.0063       | 0.873          | 0.008                   | 0.76             | 0.90                        | -               |
| L24     | 1.880 | 0.010       | 7.950  | 0.043       | 0.7671  | 0.0058       | 0.892          | 0.003                   | 0.02             | -                           | -               |
| R25     | 1.850 | 0.012       | 8.200  | 0.058       | 0.7767  | 0.0078       | 0.876          | 0.008                   | 0.01             | -                           | 0.43            |
| E26     | 1.870 | 0.009       | 7.960  | 0.040       | 0.8048  | 0.0060       | 0.894          | 0.003                   | -                | -                           | -               |
| R27     | 1.890 | 0.006       | 7.690  | 0.052       | 0.7770  | 0.0069       | 0.855          | 0.011                   | 1.69             | 0.89                        | -               |
| L28     | 1.890 | 0.007       | 8.170  | 0.026       | 0.7398  | 0.0058       | 0.875          | 0.007                   | 0.04             | -                           | 0.52            |
| Q30     | 1.830 | 0.009       | 7.900  | 0.035       | 0.7549  | 0.0061       | 0.867          | 0.018                   | 0.03             | -                           | 0.15            |
| E31     | 1.840 | 0.010       | 8.430  | 0.045       | 0.7960  | 0.0064       | 0.879          | 0.007                   | -                | -                           | 0.62            |
| L32     | 1.800 | 0.009       | 8.640  | 0.036       | 0.7595  | 0.0046       | 0.843          | 0.007                   | 0.02             | -                           | 1.23            |
| N33     | 1.850 | 0.007       | 7.530  | 0.029       | 0.7738  | 0.0112       | 0.822          | 0.008                   | 1.71             | 0.88                        | -               |
| T35     | 1.630 | 0.005       | 7.260  | 0.024       | 0.6485  | 0.0037       | 0.760          | 0.005                   | 0.04             | -                           | 0.34            |
| Q37     | 1.830 | 0.008       | 10.520 | 0.045       | 0.6665  | 0.0097       | 0.838          | 0.007                   | 0.06             | -                           | 3.10            |
| Q38     | 1.860 | 0.005       | 7.810  | 0.026       | 0.7081  | 0.0041       | 0.865          | 0.004                   | 0.05             | -                           | 0.13            |
| L39     | 1.720 | 0.007       | 7.210  | 0.027       | 0.6630  | 0.0032       | 0.799          | 0.002                   | 0.05             | -                           | -               |
| E42     | 1.800 | 0.007       | 18.220 | 0.076       | 0.7546  | 0.0069       | 0.838          | 0.009                   | 0.02             | -                           | 10.89           |
| S43     | 1.810 | 0.013       | 9.750  | 0.070       | 0.7674  | 0.0051       | 0.864          | 0.008                   | 0.02             | -                           | 1.99            |
| N44     | 1.880 | 0.006       | 8.350  | 0.035       | 0.7961  | 0.0042       | 0.879          | 0.008                   | -                | -                           | 0.74            |
| L45     | 1.900 | 0.008       | 12.240 | 0.061       | 0.7855  | 0.0058       | 0.906          | 0.005                   | 0.01             | -                           | 4.16            |
| I46     | 1.980 | 0.009       | 8.260  | 0.030       | 0.7693  | 0.0048       | 0.926          | 0.011                   | 0.74             | 0.95                        | -               |
| Q47     | 1.880 | 0.011       | 7.490  | 0.039       | 0.7454  | 0.0144       | 0.838          | 0.015                   | 1.13             | 0.89                        | -               |
| A48     | 1.810 | 0.010       | 7.800  | 0.041       | 0.7602  | 0.0058       | 0.866          | 0.003                   | 0.02             | -                           | -               |
| G49     | 1.880 | 0.007       | 7.200  | 0.032       | 0.7461  | 0.0035       | 0.782          | 0.006                   | 1.70             | 0.88                        | -               |
| L50     | 1.950 | 0.011       | 7.730  | 0.060       | 0.9168  | 0.0173       | 0.895          | 0.007                   | -                | -                           | 0.17            |
| D51     | 1.580 | 0.007       | 5.670  | 0.030       | 0.5928  | 0.0042       | 0.594          | 0.007                   | 1.10             | 0.76                        | -               |
| S52     | 1.880 | 0.013       | 7.870  | 0.048       | 0.7393  | 0.0095       | 0.862          | 0.010                   | 0.92             | 0.91                        | -               |
| I53     | 1.860 | 0.009       | 7.720  | 0.035       | 0.7729  | 0.0064       | 0.849          | 0.008                   | 1.62             | 0.89                        | -               |
| R54     | 1.860 | 0.009       | 7.670  | 0.035       | 0.7453  | 0.0065       | 0.851          | 0.011                   | 0.90             | 0.90                        | -               |
| L55     | 1.890 | 0.010       | 8.120  | 0.047       | 0.7484  | 0.0053       | 0.900          | 0.004                   | 0.04             | -                           | -               |
| M56     | 1.860 | 0.009       | 8.030  | 0.040       | 0.8017  | 0.0149       | 0.895          | 0.003                   | -                | -                           | -               |
| R57     | 1.890 | 0.009       | 7.930  | 0.030       | 0.7883  | 0.0052       | 0.875          | 0.006                   | 1.72             | 0.90                        | -               |
| W58     | 1.840 | 0.011       | 7.990  | 0.042       | 0.7970  | 0.0054       | 0.888          | 0.004                   | -                | -                           | -               |
| L59     | 1.870 | 0.012       | 8.200  | 0.047       | 0.7675  | 0.0071       | 0.903          | 0.004                   | 0.03             | -                           | -               |
| H60     | 1.890 | 0.010       | 8.190  | 0.045       | 0.8126  | 0.0071       | 0.911          | 0.004                   | -                | -                           | -               |

|            |       |       |       |       |         |        |       |       |      |      |      |
|------------|-------|-------|-------|-------|---------|--------|-------|-------|------|------|------|
| <b>W61</b> | 1.880 | 0.009 | 8.100 | 0.043 | 0.7686  | 0.0068 | 0.894 | 0.005 | 0.02 | -    | 0.10 |
| <b>F62</b> | 1.910 | 0.012 | 8.380 | 0.050 | 0.7813  | 0.0110 | 0.924 | 0.004 | 0.02 | -    | -    |
| <b>R63</b> | 1.850 | 0.009 | 8.140 | 0.041 | 0.7578  | 0.0053 | 0.881 | 0.006 | 0.03 | -    | 0.23 |
| <b>K64</b> | 1.900 | 0.011 | 8.230 | 0.061 | 0.7498  | 0.0053 | 0.897 | 0.006 | 0.04 | -    | 0.23 |
| <b>N65</b> | 1.790 | 0.004 | 7.500 | 0.031 | 0.7812  | 0.0030 | 0.839 | 0.009 | 1.03 | 0.86 | -    |
| <b>G66</b> | 1.840 | 0.006 | 7.670 | 0.027 | 0.7623  | 0.0032 | 0.866 | 0.002 | 0.02 | -    | -    |
| <b>Y67</b> | 1.950 | 0.006 | 7.660 | 0.027 | 0.7799  | 0.0051 | 0.861 | 0.010 | 1.66 | 0.91 | -    |
| <b>R68</b> | 1.790 | 0.007 | 6.780 | 0.027 | 0.6983  | 0.0031 | 0.755 | 0.013 | 1.09 | 0.85 | -    |
| <b>L69</b> | 1.730 | 0.006 | 5.610 | 0.025 | 0.6070  | 0.0041 | 0.569 | 0.006 | 1.47 | 0.80 | -    |
| <b>T70</b> | 1.870 | 0.004 | 7.150 | 0.023 | 0.7681  | 0.0030 | 0.849 | 0.002 | 0.01 | -    | -    |
| <b>L71</b> | 1.960 | 0.014 | 7.820 | 0.055 | 0.7896  | 0.0072 | 0.904 | 0.007 | -    | -    | 0.12 |
| <b>R72</b> | 1.920 | 0.013 | 7.580 | 0.044 | 0.7548  | 0.0085 | 0.880 | 0.004 | 0.03 | -    | -    |
| <b>E73</b> | 1.850 | 0.009 | 7.820 | 0.037 | 0.7710  | 0.0042 | 0.880 | 0.003 | 0.02 | -    | -    |
| <b>L74</b> | 1.890 | 0.009 | 7.320 | 0.035 | 0.7807  | 0.0036 | 0.846 | 0.008 | 1.62 | 0.87 | -    |
| <b>Y75</b> | 1.900 | 0.009 | 7.530 | 0.032 | 0.7720  | 0.0041 | 0.876 | 0.003 | 0.02 | -    | -    |
| <b>A76</b> | 1.910 | 0.009 | 7.710 | 0.043 | 0.7673  | 0.0057 | 0.857 | 0.010 | 1.59 | 0.90 | -    |
| <b>A77</b> | 1.750 | 0.006 | 7.340 | 0.032 | 0.7003  | 0.0032 | 0.800 | 0.006 | 0.04 | -    | 0.36 |
| <b>T79</b> | 1.800 | 0.005 | 7.900 | 0.027 | 0.7125  | 0.0053 | 0.835 | 0.004 | 0.04 | -    | 0.51 |
| <b>L80</b> | 1.860 | 0.008 | 8.100 | 0.034 | 0.7454  | 0.0046 | 0.871 | 0.007 | 0.03 | -    | 0.40 |
| <b>A81</b> | 1.880 | 0.010 | 8.170 | 0.046 | 0.7955  | 0.0061 | 0.908 | 0.003 | -    | -    | -    |
| <b>A82</b> | 1.910 | 0.009 | 8.160 | 0.037 | 0.7989  | 0.0080 | 0.914 | 0.003 | -    | -    | -    |
| <b>W83</b> | 1.860 | 0.009 | 8.140 | 0.039 | 0.7926  | 0.0049 | 0.890 | 0.005 | -    | -    | 0.21 |
| <b>N84</b> | 1.910 | 0.009 | 7.930 | 0.041 | 0.7908  | 0.0056 | 0.892 | 0.006 | 1.65 | 0.91 | -    |
| <b>Q85</b> | 1.820 | 0.010 | 7.960 | 0.039 | 0.7883  | 0.0059 | 0.873 | 0.005 | -    | -    | 0.15 |
| <b>L86</b> | 1.860 | 0.012 | 8.260 | 0.052 | 0.8219  | 0.0051 | 0.892 | 0.006 | -    | -    | 0.29 |
| <b>M87</b> | 1.850 | 0.010 | 7.720 | 0.031 | 0.7912  | 0.0055 | 0.871 | 0.005 | -    | -    | 0.10 |
| <b>S89</b> | 1.780 | 0.006 | 7.180 | 0.027 | 0.7315  | 0.0086 | 0.783 | 0.007 | 1.24 | 0.85 | -    |
| <b>R90</b> | 1.870 | 0.005 | 6.760 | 0.028 | 0.7377  | 0.0033 | 0.748 | 0.004 | 1.51 | 0.87 | -    |
| <b>G93</b> | 1.550 | 0.005 | 3.360 | 0.027 | 0.1075  | 0.0032 | 0.240 | 0.008 | 1.06 | 0.78 | -    |
| <b>NN</b>  | 1.480 | 0.008 | 2.450 | 0.026 | -0.1610 | 0.0050 |       |       |      |      |      |
| <b>NR</b>  | 0.820 | 0.004 | 1.370 | 0.019 | -0.6591 | 0.0089 |       |       |      |      |      |

**Table S3.** Relaxation parameters and model-free parameters for holo-ArCP. The experimental error for a given parameter is indicated with the  $\sigma$  symbol. ROTDIF<sup>6,7</sup> does not provide experimental errors for  $\tau_{\text{loc}}$ ,  $S_f^2$ , nor  $R_{\text{ex}}$ . Dashes indicate when a given model-free parameter was not included in the fit. Due to limitations of the Lipari-Szabo model, the NN and NR positions of the PP arm were not fit with the model free formalism.

| Residue | R1    | $\sigma$ R1 | R2     | $\sigma$ R2 | NOE     | $\sigma$ NOE | S <sup>2</sup> | $\sigma$ S <sup>2</sup> | T <sub>loc</sub> | S <sub>f</sub> <sup>2</sup> | R <sub>ex</sub> |
|---------|-------|-------------|--------|-------------|---------|--------------|----------------|-------------------------|------------------|-----------------------------|-----------------|
| D14     | 1.430 | 0.013       | 2.800  | 0.037       | -0.1846 | 0.0110       | 0.176          | 0.007                   | 0.87             | 0.77                        | -               |
| N15     | 1.600 | 0.007       | 3.540  | 0.020       | 0.1449  | 0.0041       | 0.254          | 0.004                   | 1.09             | 0.79                        | -               |
| R16     | 1.810 | 0.013       | 7.250  | 0.030       | 0.5372  | 0.0062       | 0.809          | 0.003                   | 0.12             | -                           | -               |
| H17     | 1.930 | 0.011       | 7.480  | 0.032       | 0.7035  | 0.0065       | 0.830          | 0.008                   | 1.03             | 0.92                        | -               |
| A18     | 1.980 | 0.018       | 11.800 | 0.068       | 0.7458  | 0.0077       | 0.932          | 0.009                   | 0.07             | -                           | 3.50            |
| A19     | 1.970 | 0.013       | 10.290 | 0.044       | 0.7197  | 0.0078       | 0.937          | 0.006                   | 0.13             | -                           | 1.76            |
| Y21     | 1.880 | 0.011       | 8.410  | 0.031       | 0.8009  | 0.0078       | 0.898          | 0.007                   | -                | -                           | 0.42            |
| Q22     | 1.870 | 0.016       | 8.310  | 0.063       | 0.7946  | 0.0084       | 0.913          | 0.005                   | -                | -                           | -               |
| Q23     | 1.860 | 0.009       | 8.030  | 0.041       | 0.7753  | 0.0058       | 0.892          | 0.003                   | 0.02             | -                           | -               |
| L24     | 1.880 | 0.012       | 8.020  | 0.036       | 0.7711  | 0.0057       | 0.884          | 0.007                   | 0.95             | 0.91                        | -               |
| R25     | 1.860 | 0.010       | 8.410  | 0.039       | 0.7926  | 0.0066       | 0.896          | 0.005                   | 0.01             | -                           | 0.34            |
| E26     | 1.860 | 0.010       | 8.130  | 0.039       | 0.8064  | 0.0057       | 0.900          | 0.003                   | -                | -                           | -               |
| R27     | 1.850 | 0.010       | 8.310  | 0.038       | 0.7590  | 0.0045       | 0.881          | 0.011                   | 0.03             | -                           | 0.39            |
| L28     | 1.900 | 0.009       | 8.360  | 0.024       | 0.7423  | 0.0049       | 0.893          | 0.005                   | 0.04             | -                           | 0.43            |
| Q30     | 1.870 | 0.010       | 8.140  | 0.035       | 0.7582  | 0.0048       | 0.898          | 0.003                   | 0.03             | -                           | -               |
| E31     | 1.850 | 0.008       | 8.540  | 0.028       | 0.8073  | 0.0052       | 0.881          | 0.005                   | -                | -                           | 0.75            |
| N33     | 1.830 | 0.008       | 7.830  | 0.025       | 0.7780  | 0.0059       | 0.848          | 0.009                   | 1.73             | 0.88                        | -               |
| T35     | 1.610 | 0.005       | 7.470  | 0.018       | 0.6551  | 0.0035       | 0.755          | 0.005                   | 0.04             | -                           | 0.57            |
| Q37     | 1.830 | 0.008       | 10.070 | 0.036       | 0.6743  | 0.0049       | 0.836          | 0.004                   | 0.06             | -                           | 2.71            |
| Q38     | 1.850 | 0.007       | 7.940  | 0.024       | 0.7002  | 0.0038       | 0.856          | 0.023                   | 0.05             | -                           | 0.35            |
| L39     | 1.750 | 0.008       | 7.300  | 0.026       | 0.7094  | 0.0048       | 0.819          | 0.003                   | 0.04             | -                           | -               |
| H40     | 1.790 | 0.009       | 19.480 | 0.139       | 0.7872  | 0.0061       | 0.827          | 0.006                   | -                | -                           | 12.40           |
| E42     | 1.910 | 0.010       | 15.980 | 0.087       | 0.7491  | 0.0062       | 0.896          | 0.005                   | 0.04             | -                           | 8.05            |
| S43     | 1.850 | 0.027       | 9.140  | 0.094       | 0.7968  | 0.0089       | 0.861          | 0.014                   | -                | -                           | 1.72            |
| N44     | 1.900 | 0.011       | 8.550  | 0.035       | 0.8094  | 0.0058       | 0.915          | 0.008                   | -                | -                           | 0.34            |
| L45     | 1.960 | 0.011       | 11.950 | 0.063       | 0.7526  | 0.0050       | 0.931          | 0.005                   | 0.06             | -                           | 3.60            |
| I46     | 1.990 | 0.008       | 8.330  | 0.026       | 0.7488  | 0.0036       | 0.938          | 0.002                   | 0.07             | -                           | -               |
| Q47     | 1.880 | 0.019       | 7.970  | 0.062       | 0.8018  | 0.0101       | 0.900          | 0.006                   | -                | -                           | -               |
| A48     | 1.830 | 0.014       | 8.270  | 0.049       | 0.7544  | 0.0051       | 0.900          | 0.004                   | 0.04             | -                           | -               |
| G49     | 1.880 | 0.017       | 7.370  | 0.045       | 0.7812  | 0.0078       | 0.863          | 0.005                   | 0.01             | -                           | -               |
| L50     | 1.920 | 0.011       | 8.110  | 0.059       | 0.8028  | 0.0122       | 0.916          | 0.004                   | -                | -                           | -               |
| D51     | 1.620 | 0.008       | 6.040  | 0.028       | 0.6241  | 0.0047       | 0.651          | 0.011                   | 0.98             | 0.78                        | -               |
| S52     | 1.940 | 0.014       | 8.110  | 0.046       | 0.7324  | 0.0077       | 0.899          | 0.006                   | 0.05             | -                           | 0.22            |
| I53     | 1.940 | 0.009       | 8.010  | 0.028       | 0.6934  | 0.0060       | 0.874          | 0.008                   | 0.73             | 0.95                        | -               |
| R54     | 1.930 | 0.009       | 7.990  | 0.037       | 0.7571  | 0.0063       | 0.858          | 0.007                   | 1.68             | 0.93                        | -               |
| L55     | 1.940 | 0.013       | 8.360  | 0.051       | 0.7862  | 0.0084       | 0.923          | 0.017                   | 0.02             | -                           | 0.15            |
| M56     | 1.900 | 0.011       | 8.160  | 0.043       | 0.7918  | 0.0070       | 0.911          | 0.004                   | 0.01             | -                           | -               |
| R57     | 2.230 | 0.032       | 8.160  | 0.060       | 0.8509  | 0.0354       | 0.846          | 0.022                   | 1.74             | -                           | -               |

|            |       |       |       |       |        |        |       |       |      |      |      |
|------------|-------|-------|-------|-------|--------|--------|-------|-------|------|------|------|
| <b>W58</b> | 1.880 | 0.022 | 7.960 | 0.071 | 0.7701 | 0.0145 | 0.861 | 0.013 | 1.63 | 0.91 | -    |
| <b>L59</b> | 1.940 | 0.012 | 8.310 | 0.048 | 0.7695 | 0.0059 | 0.915 | 0.008 | 0.87 | 0.94 | -    |
| <b>H60</b> | 2.000 | 0.013 | 8.130 | 0.051 | 0.8375 | 0.0066 | 0.932 | 0.004 | -    | -    | -    |
| <b>W61</b> | 1.960 | 0.015 | 7.940 | 0.055 | 0.8032 | 0.0090 | 0.874 | 0.015 | 1.73 | 0.93 | -    |
| <b>F62</b> | 1.920 | 0.013 | 8.400 | 0.044 | 0.8643 | 0.0073 | 0.924 | 0.007 | -    | -    | 0.11 |
| <b>R63</b> | 1.890 | 0.011 | 8.470 | 0.035 | 0.7254 | 0.0073 | 0.902 | 0.006 | 0.06 | -    | 0.25 |
| <b>K64</b> | 1.960 | 0.014 | 8.430 | 0.048 | 0.7856 | 0.0075 | 0.938 | 0.004 | 0.02 | -    | -    |
| <b>N65</b> | 1.840 | 0.007 | 7.680 | 0.030 | 0.7898 | 0.0043 | 0.840 | 0.009 | 1.74 | 0.88 | -    |
| <b>G66</b> | 1.850 | 0.006 | 8.010 | 0.021 | 0.7878 | 0.0033 | 0.889 | 0.002 | 0.01 | -    | -    |
| <b>Y67</b> | 1.920 | 0.009 | 7.870 | 0.027 | 0.8005 | 0.0049 | 0.901 | 0.003 | -    | -    | -    |
| <b>R68</b> | 1.780 | 0.006 | 7.200 | 0.025 | 0.7366 | 0.0025 | 0.792 | 0.009 | 1.15 | 0.85 | -    |
| <b>L69</b> | 1.760 | 0.006 | 5.850 | 0.021 | 0.6175 | 0.0043 | 0.601 | 0.006 | 1.46 | 0.82 | -    |
| <b>T70</b> | 1.840 | 0.005 | 7.530 | 0.021 | 0.7810 | 0.0042 | 0.862 | 0.002 | 0.01 | -    | -    |
| <b>L71</b> | 2.010 | 0.017 | 8.020 | 0.032 | 0.8225 | 0.0125 | 0.934 | 0.005 | -    | -    | -    |
| <b>R72</b> | 1.930 | 0.010 | 7.850 | 0.032 | 0.7531 | 0.0042 | 0.877 | 0.008 | 1.04 | 0.92 | -    |
| <b>E73</b> | 1.940 | 0.028 | 7.500 | 0.071 | 0.7624 | 0.0126 | 0.813 | 0.015 | 1.71 | 0.90 | -    |
| <b>L74</b> | 1.920 | 0.025 | 7.740 | 0.072 | 0.7615 | 0.0085 | 0.891 | 0.007 | 0.03 | -    | -    |
| <b>A76</b> | 1.900 | 0.013 | 8.150 | 0.042 | 0.7978 | 0.0088 | 0.890 | 0.010 | 1.74 | 0.92 | -    |
| <b>A77</b> | 1.800 | 0.008 | 7.730 | 0.030 | 0.7203 | 0.0042 | 0.854 | 0.003 | 0.04 | -    | -    |
| <b>T79</b> | 1.800 | 0.007 | 8.230 | 0.034 | 0.7380 | 0.0043 | 0.851 | 0.004 | 0.03 | -    | 0.60 |
| <b>L80</b> | 1.910 | 0.010 | 8.090 | 0.032 | 0.7733 | 0.0040 | 0.906 | 0.003 | 0.02 | -    | -    |
| <b>A81</b> | 1.870 | 0.012 | 8.380 | 0.043 | 0.8145 | 0.0073 | 0.909 | 0.006 | -    | -    | 0.13 |
| <b>A82</b> | 1.860 | 0.018 | 8.470 | 0.069 | 0.7861 | 0.0107 | 0.891 | 0.013 | 0.01 | -    | 0.48 |
| <b>W83</b> | 1.890 | 0.010 | 8.420 | 0.037 | 0.8081 | 0.0050 | 0.915 | 0.005 | -    | -    | 0.15 |
| <b>N84</b> | 1.870 | 0.012 | 8.270 | 0.044 | 0.7933 | 0.0087 | 0.903 | 0.007 | -    | -    | 0.14 |
| <b>Q85</b> | 1.840 | 0.013 | 8.220 | 0.043 | 0.7954 | 0.0070 | 0.901 | 0.004 | -    | -    | -    |
| <b>L86</b> | 1.880 | 0.025 | 8.200 | 0.086 | 0.8387 | 0.0150 | 0.908 | 0.008 | -    | -    | -    |
| <b>M87</b> | 1.830 | 0.016 | 7.910 | 0.062 | 0.8112 | 0.0081 | 0.871 | 0.008 | -    | -    | 0.21 |
| <b>S89</b> | 1.780 | 0.007 | 7.380 | 0.022 | 0.7288 | 0.0034 | 0.833 | 0.002 | 0.03 | -    | -    |
| <b>R90</b> | 1.870 | 0.005 | 6.920 | 0.018 | 0.7050 | 0.0038 | 0.769 | 0.007 | 1.30 | 0.87 | -    |
| <b>G93</b> | 1.550 | 0.005 | 3.290 | 0.020 | 0.0700 | 0.0033 | 0.226 | 0.004 | 1.04 | 0.78 | -    |
| <b>NN</b>  | 1.740 | 0.007 | 3.920 | 0.020 | 0.3687 | 0.0035 |       |       |      |      |      |
| <b>NR</b>  | 1.530 | 0.005 | 3.350 | 0.023 | 0.1834 | 0.0025 |       |       |      |      |      |

**Table S4.** Relaxation parameters and model-free parameters for loaded-ArCP. The experimental error for a given parameter is indicated with the  $\sigma$  symbol. ROTDIF<sup>6,7</sup> does not provide experimental errors for  $\tau_{loc}$ ,  $S_f^2$ , nor  $R_{ex}$ . Dashes indicate when a given model-free parameter was not included in the fit. Due to limitations of the Lipari-Szabo model, the NN and NR positions of the PP arm were not fit with the model free formalism.

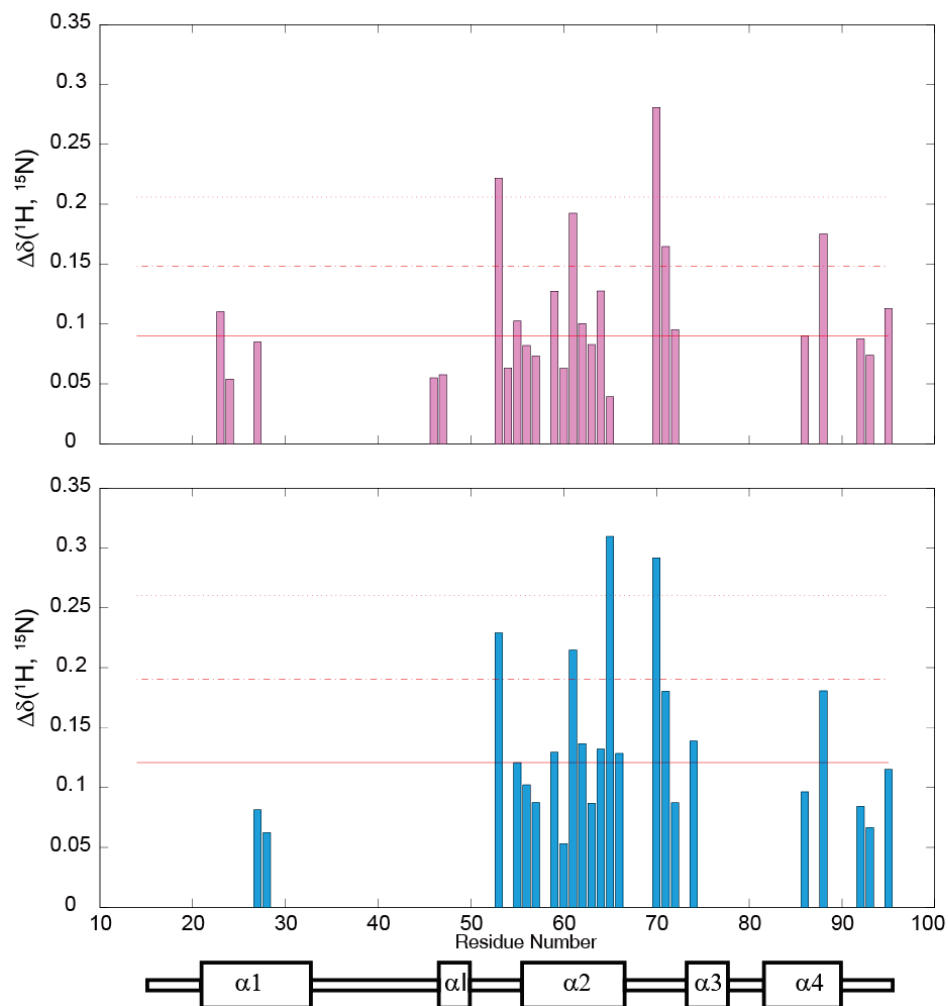

**Figure S8.** Chemical shift perturbations between major and minor forms in holo (top) and loaded (bottom) ArCP. The solid horizontal lines indicate the median (0.09 for holo, 0.12 for loaded) and the median with one standard deviation (std = 0.06 for holo, std = 0.07 for loaded). The reported chemical shift differences are calculated with  $\Delta\delta(^1\text{H}, ^{15}\text{N}) = ((\Delta\delta\text{H})^2 + (1/5(\Delta\delta\text{N}))^2)^{1/2}$  where  $\Delta\delta_i$  is the chemical shift difference between the two species for nucleus  $i$ .

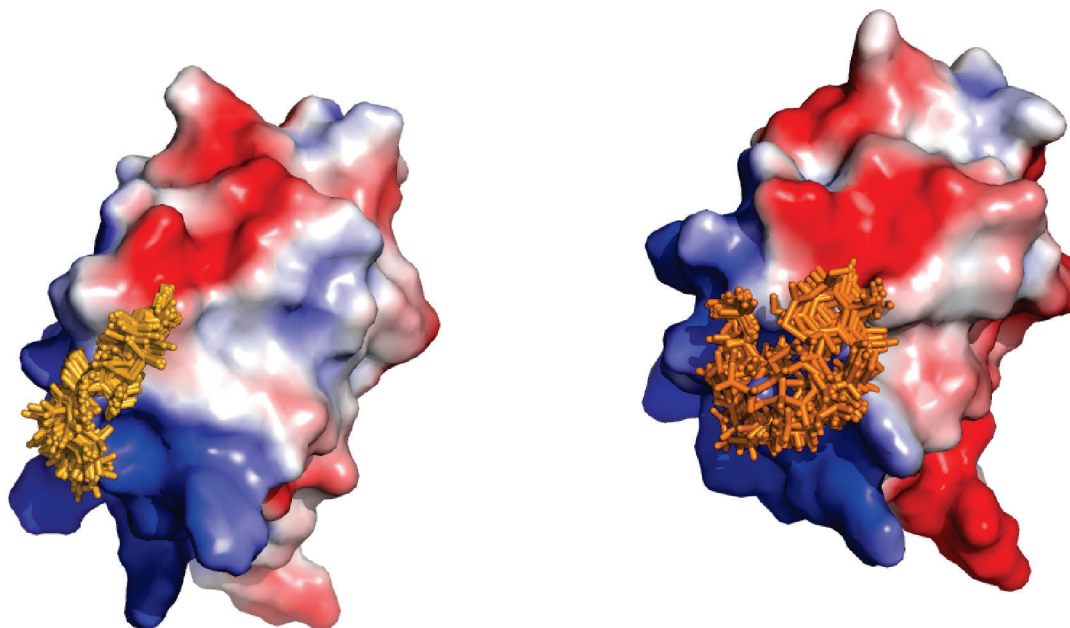

**Figure S9.** Interference between the conformation of the prosthetic groups and interaction surfaces. Blue, positive charges; red, negative charges. Upon substrate loading, the change of conformation in PP modifies access to the positively charged surface as well as the negatively charged surface. Surface potentials were generated using the APBS Tools2.1 plugin<sup>8</sup> for PyMOL<sup>9</sup>.



## REFERENCES

- (1) Goodrich, A. C.; Frueh, D. P. *Biochemistry* 2015, 54, 1154.
- (2) Guntert, P. *Methods Mol Biol* 2004, 278, 353.
- (3) Laskowski, R.; Rullmann, J. A.; MacArthur, M.; Kaptein, R.; Thornton, J. J. *Biomol. NMR* 1996, 8, 477.
- (4) Bhattacharya, A.; Tejero, R.; Montelione, G. T. *Proteins* 2007, 66, 778.
- (5) Koradi, R.; Billeter, M.; Wuthrich, K. J. *Mol. Graphics* 1996, 14, 51.
- (6) Walker, O.; Varadan, R.; Fushman, D. J. *Magn. Reson.* 2004, 168, 336.
- (7) Berlin, K.; Longhini, A.; Dayie, T. K.; Fushman, D. J. *Biomol. NMR* 2013, 57, 333.
- (8) Baker, N. A.; Sept, D.; Joseph, S.; Holst, M. J.; McCammon, J. A. *Proc Natl Acad Sci USA* 2001, 98, 10037.
- (9) Schrodinger, LLC 2010.

### NMR chemical shift assignments (BMRB 25786):

**Holo-ArCP (residues after 100 belong to the second minor conformer)**

| residue number | Nucleus | Chemical Shift (ppm) |
|----------------|---------|----------------------|
| 14             | H       | 8.569                |
| 14             | N       | 122.9                |
| 14             | CA      | 54.25                |
| 14             | CB      | 41.083               |
| 14             | C       | 176.031              |
| 14             | HB2     | 2.749                |
| 14             | HB3     | 2.68                 |
| 14             | HA      | 4.645                |
| 15             | H       | 8.425                |
| 15             | N       | 119.857              |
| 15             | CA      | 53.556               |
| 15             | CB      | 38.731               |
| 15             | C       | 175.735              |
| 15             | HA      | 4.719                |
| 15             | HB2     | 2.88                 |
| 15             | HB3     | 2.82                 |
| 16             | H       | 8.347                |
| 16             | CA      | 57.735               |
| 16             | HA      | 4.211                |
| 16             | CD      | 43.039               |
| 16             | CB      | 30.224               |
| 16             | CG      | 26.684               |
| 16             | HB      | 1.849                |
| 16             | HG      | 1.628                |
| 16             | HD      | 3.206                |
| 16             | N       | 122.03               |
| 16             | C       | 176.669              |
| 17             | H       | 8.395                |
| 17             | N       | 118.59               |
| 17             | CA      | 58.394               |
| 17             | CB      | 30.362               |
| 17             | HA      | 4.563                |

|    |     |         |
|----|-----|---------|
| 17 | HB3 | 3.147   |
| 17 | HB2 | 3.261   |
| 17 | C   | 176.284 |
| 17 | CD2 | 118.396 |
| 17 | HD2 | 6.998   |
| 18 | H   | 8.436   |
| 18 | N   | 122.047 |
| 18 | CA  | 54.294  |
| 18 | C   | 180.003 |
| 18 | CB  | 18.849  |
| 18 | HB  | 1.581   |
| 18 | HA  | 4.182   |
| 19 | H   | 8.402   |
| 19 | N   | 122.607 |
| 19 | CA  | 55.04   |
| 19 | CB  | 18.267  |
| 19 | HB  | 1.571   |
| 19 | HA  | 4.275   |
| 19 | C   | 180.295 |
| 20 | H   | 8.317   |
| 20 | N   | 118.796 |
| 20 | HB  | 2.925   |
| 20 | CB  | 40.189  |
| 20 | CA  | 56.725  |
| 20 | HA  | 4.837   |
| 20 | C   | 177.313 |
| 21 | H   | 8.679   |
| 21 | N   | 120.958 |
| 21 | CA  | 61.892  |
| 21 | CB  | 38.655  |
| 21 | C   | 176.282 |
| 21 | HA  | 4.058   |
| 21 | HB3 | 3.003   |
| 21 | HB2 | 3.059   |
| 21 | CD  | 133.064 |
| 21 | HE  | 6.67    |
| 21 | HD  | 7.006   |
| 21 | CE  | 118.183 |
| 22 | H   | 8.236   |
| 22 | N   | 117.715 |
| 22 | CA  | 59.11   |
| 22 | C   | 178.197 |
| 22 | CB  | 27.43   |
| 22 | CG  | 33.273  |
| 22 | HA  | 3.826   |
| 22 | HG  | 2.494   |
| 22 | HB  | 2.227   |

|    |     |         |
|----|-----|---------|
| 23 | H   | 8.003   |
| 23 | N   | 118.526 |
| 23 | CA  | 58.915  |
| 23 | C   | 177.521 |
| 23 | CB  | 29.032  |
| 23 | CG  | 34.938  |
| 23 | HA  | 4.1     |
| 23 | HG  | 2.67    |
| 23 | HB3 | 2.454   |
| 23 | HB2 | 2.372   |
| 24 | H   | 8.031   |
| 24 | N   | 121.914 |
| 24 | CA  | 58.115  |
| 24 | CB  | 41.704  |
| 24 | CD1 | 26.981  |
| 24 | HD1 | 0.975   |
| 24 | CD2 | 23.617  |
| 24 | HD2 | 0.059   |
| 24 | HA  | 3.444   |
| 24 | C   | 176.882 |
| 24 | HB2 | 1.908   |
| 24 | HB3 | 1.335   |
| 25 | H   | 7.981   |
| 25 | N   | 116.645 |
| 25 | CA  | 60.246  |
| 25 | CB  | 29.925  |
| 25 | C   | 177.469 |
| 25 | CG  | 27.902  |
| 25 | CD  | 43.155  |
| 25 | HG  | 1.211   |
| 25 | HD  | 3.025   |
| 25 | HA  | 3.395   |
| 25 | HB2 | 1.577   |
| 25 | HB3 | 1.293   |
| 26 | H   | 8.16    |
| 26 | N   | 115.943 |
| 26 | CA  | 59.517  |
| 26 | CB  | 29.439  |
| 26 | HA  | 3.832   |
| 26 | CG  | 36.563  |
| 26 | C   | 179.682 |
| 26 | HB3 | 2.104   |
| 26 | HB2 | 2.002   |
| 26 | HG3 | 2.264   |
| 26 | HG2 | 2.449   |
| 27 | H   | 8.283   |
| 27 | N   | 118.766 |

|    |     |         |
|----|-----|---------|
| 27 | CA  | 58.855  |
| 27 | CB  | 29.996  |
| 27 | C   | 179.241 |
| 27 | CG  | 27.803  |
| 27 | CD  | 42.978  |
| 27 | HA  | 4.144   |
| 27 | HG2 | 1.649   |
| 27 | HD2 | 3.001   |
| 27 | HD3 | 2.782   |
| 27 | HB  | 1.996   |
| 27 | HG3 | 1.847   |
| 28 | H   | 8.389   |
| 28 | N   | 122.077 |
| 28 | CA  | 58.558  |
| 28 | CB  | 42.514  |
| 28 | C   | 178.766 |
| 28 | HD1 | 0.312   |
| 28 | CD1 | 26.726  |
| 28 | HA  | 4.106   |
| 28 | CD2 | 24.237  |
| 28 | HD2 | 0.438   |
| 28 | HG  | 1.325   |
| 28 | HB2 | 0.932   |
| 28 | HB3 | 1.74    |
| 28 | CG  | 26.881  |
| 29 | H   | 7.914   |
| 29 | N   | 117.586 |
| 29 | CA  | 66.203  |
| 29 | CB  | 37.823  |
| 29 | C   | 177.927 |
| 29 | CG2 | 17.235  |
| 29 | HG2 | 0.76    |
| 29 | HB  | 1.872   |
| 29 | HA  | 3.339   |
| 29 | CD1 | 14.135  |
| 29 | CG1 | 30.527  |
| 29 | HD1 | 0.724   |
| 29 | HG1 | 1.717   |
| 30 | H   | 7.287   |
| 30 | N   | 116.395 |
| 30 | CA  | 58.41   |
| 30 | CB  | 28.804  |
| 30 | C   | 179.4   |
| 30 | HA  | 4.157   |
| 30 | CG  | 33.599  |
| 30 | HB  | 2.192   |
| 30 | HG2 | 2.418   |

|    |     |         |
|----|-----|---------|
| 30 | HG3 | 2.551   |
| 31 | H   | 8.814   |
| 31 | N   | 120.336 |
| 31 | CA  | 59.377  |
| 31 | CB  | 30.436  |
| 31 | C   | 178.395 |
| 31 | CG  | 36.933  |
| 31 | HA  | 4.023   |
| 31 | HG3 | 2.449   |
| 31 | HG2 | 2.234   |
| 31 | HB3 | 2.108   |
| 31 | HB2 | 2.231   |
| 32 | H   | 8.109   |
| 32 | N   | 115.139 |
| 32 | CA  | 54.101  |
| 32 | C   | 176.033 |
| 32 | CD1 | 21.557  |
| 32 | HD1 | 0.675   |
| 32 | HA  | 4.377   |
| 32 | HG  | 1.497   |
| 32 | CD2 | 25.912  |
| 32 | CB  | 41.354  |
| 32 | HD2 | 0.664   |
| 32 | HB3 | 1.678   |
| 32 | HB2 | 1.763   |
| 33 | H   | 7.796   |
| 33 | N   | 116.751 |
| 33 | CA  | 54.024  |
| 33 | CB  | 36.929  |
| 33 | C   | 174.288 |
| 33 | HB2 | 2.734   |
| 33 | HA  | 4.453   |
| 33 | HB3 | 3.151   |
| 34 | H   | 7.728   |
| 34 | N   | 117.139 |
| 34 | CA  | 53.079  |
| 34 | CB  | 44.673  |
| 34 | C   | 176.521 |
| 34 | HA  | 4.787   |
| 34 | CG  | 26.865  |
| 34 | HD1 | 0.708   |
| 34 | HD2 | 0.802   |
| 34 | CD2 | 22.457  |
| 34 | CD1 | 26.793  |
| 34 | HB2 | 1.408   |
| 34 | HB3 | 1.54    |
| 35 | H   | 8.001   |

|    |     |         |
|----|-----|---------|
| 35 | N   | 110.751 |
| 35 | CA  | 59.445  |
| 35 | CB  | 68.651  |
| 35 | HG2 | 1.254   |
| 35 | CG2 | 21.746  |
| 35 | HB  | 4.563   |
| 35 | HA  | 4.803   |
| 35 | C   | 174.438 |
| 36 | CA  | 65.645  |
| 36 | HA  | 4.077   |
| 36 | CB  | 31.632  |
| 36 | CG  | 28.311  |
| 36 | HB2 | 2.378   |
| 36 | HB3 | 1.928   |
| 36 | HG3 | 2.206   |
| 36 | HG2 | 2.016   |
| 36 | CD  | 50.289  |
| 36 | HD  | 3.87    |
| 37 | H   | 8.005   |
| 37 | N   | 112.874 |
| 37 | CA  | 57.891  |
| 37 | CB  | 27.902  |
| 37 | CG  | 34.167  |
| 37 | HA  | 4.105   |
| 37 | HB  | 2.039   |
| 37 | HG2 | 2.382   |
| 37 | HG3 | 2.479   |
| 37 | C   | 176.96  |
| 38 | H   | 7.663   |
| 38 | N   | 116.477 |
| 38 | CA  | 56.398  |
| 38 | C   | 175.508 |
| 38 | CB  | 31.126  |
| 38 | CG  | 34.803  |
| 38 | HG  | 2.349   |
| 38 | HB  | 2.156   |
| 38 | HA  | 4.187   |
| 39 | H   | 7.286   |
| 39 | N   | 120.726 |
| 39 | HD1 | 0.627   |
| 39 | CD1 | 26.467  |
| 39 | CD2 | 22.953  |
| 39 | HD2 | 0.64    |
| 39 | CA  | 53.959  |
| 39 | CB  | 41.61   |
| 39 | HB3 | 0.993   |
| 39 | HB2 | 1.719   |

|    |     |         |
|----|-----|---------|
| 39 | HA  | 4.371   |
| 39 | C   | 174.277 |
| 39 | HG  | 1.259   |
| 39 | CG  | 26.798  |
| 40 | H   | 8.158   |
| 40 | N   | 124.68  |
| 40 | CA  | 54.762  |
| 40 | HB2 | 3.16    |
| 40 | HB3 | 3.254   |
| 40 | CB  | 31.521  |
| 40 | C   | 176.727 |
| 40 | HE1 | 8.106   |
| 40 | CE1 | 137.409 |
| 40 | HA  | 4.808   |
| 41 | HA  | 4.029   |
| 41 | HB  | 2.072   |
| 41 | HG  | 2.345   |
| 42 | H   | 8.808   |
| 42 | N   | 113.813 |
| 42 | CA  | 55.313  |
| 42 | CG  | 36.154  |
| 42 | CB  | 29.165  |
| 42 | HG  | 2.205   |
| 42 | HA  | 4.547   |
| 42 | C   | 176.68  |
| 42 | HB3 | 1.909   |
| 42 | HB2 | 2.296   |
| 43 | H   | 7.485   |
| 43 | N   | 118.066 |
| 43 | CA  | 60.156  |
| 43 | CB  | 62.827  |
| 43 | HA  | 4.088   |
| 43 | C   | 173.663 |
| 43 | HB2 | 3.641   |
| 43 | HB3 | 3.713   |
| 44 | H   | 8.811   |
| 44 | N   | 123.218 |
| 44 | CA  | 53.987  |
| 44 | C   | 176.926 |
| 44 | CB  | 38.433  |
| 44 | HA  | 4.392   |
| 44 | HB2 | 2.721   |
| 44 | HB3 | 2.816   |
| 45 | H   | 9.385   |
| 45 | N   | 128.735 |
| 45 | CA  | 57.149  |
| 45 | CB  | 42.25   |

|    |      |         |
|----|------|---------|
| 45 | HA   | 3.722   |
| 45 | HD1  | 0.397   |
| 45 | HB3  | 1.07    |
| 45 | CG   | 26.677  |
| 45 | HG   | 1.368   |
| 45 | CD1  | 22.644  |
| 45 | CD2  | 23.644  |
| 45 | HD2  | -0.631  |
| 45 | C    | 178.143 |
| 45 | HB2  | 1.018   |
| 46 | H    | 7.659   |
| 46 | N    | 119.379 |
| 46 | CA   | 63.814  |
| 46 | CB   | 36.709  |
| 46 | C    | 180.926 |
| 46 | CG1  | 28.02   |
| 46 | CG2  | 16.768  |
| 46 | HG2  | 0.984   |
| 46 | HA   | 4.187   |
| 46 | HB   | 2.211   |
| 46 | CD1  | 12.594  |
| 46 | HD1  | 0.879   |
| 46 | HG12 | 1.371   |
| 46 | HG13 | 1.557   |
| 47 | H    | 8.161   |
| 47 | N    | 121.737 |
| 47 | CA   | 58.033  |
| 47 | CB   | 27.985  |
| 47 | C    | 177.739 |
| 47 | CG   | 33.839  |
| 47 | HG   | 2.385   |
| 47 | HA   | 3.989   |
| 47 | HB2  | 2.144   |
| 47 | HB3  | 1.948   |
| 48 | H    | 7.448   |
| 48 | N    | 117.777 |
| 48 | CA   | 52.71   |
| 48 | CB   | 18.601  |
| 48 | C    | 176.582 |
| 48 | HB   | 1.403   |
| 48 | HA   | 4.26    |
| 49 | H    | 7.445   |
| 49 | N    | 102.932 |
| 49 | CA   | 44.967  |
| 49 | C    | 174.451 |
| 49 | HA2  | 3.683   |
| 49 | HA3  | 4.551   |



|    |     |         |
|----|-----|---------|
| 50 | H   | 8.545   |
| 50 | N   | 123.058 |
| 50 | CA  | 55.909  |
| 50 | CB  | 41.454  |
| 50 | C   | 173.46  |
| 50 | HD2 | 0.832   |
| 50 | CD1 | 25.838  |
| 50 | CD2 | 26.681  |
| 50 | HA  | 4.257   |
| 50 | HD1 | 0.917   |
| 50 | HB2 | 1.452   |
| 50 | HB3 | 1.677   |
| 51 | H   | 7.411   |
| 51 | N   | 123.238 |
| 51 | CA  | 52.325  |
| 51 | CB  | 42.256  |
| 51 | HA  | 4.83    |
| 51 | C   | 176.212 |
| 51 | HB2 | 2.792   |
| 51 | HB3 | 3.24    |
| 52 | H   | 9.001   |
| 52 | N   | 113.44  |
| 52 | CA  | 61.016  |
| 52 | HA  | 4.265   |
| 52 | CB  | 65.748  |
| 52 | C   | 175.8   |
| 52 | HB2 | 4.214   |
| 52 | HB3 | 4.257   |
| 52 | HJ2 | 3.374   |
| 52 | HJ3 | 3.763   |
| 52 | CJ  | 74.026  |
| 52 | HL2 | 0.798   |
| 52 | CL2 | 21.384  |
| 52 | HL1 | 0.881   |
| 52 | CL1 | 23.595  |
| 52 | HL3 | 3.993   |
| 52 | CL3 | 76.726  |
| 52 | HO  | 3.459   |
| 52 | CO  | 38.076  |
| 52 | HP  | 2.455   |
| 52 | CP  | 38.169  |
| 52 | HS  | 3.275   |
| 52 | CS  | 45.084  |
| 52 | HT  | 2.558   |
| 52 | CT  | 26.012  |
| 53 | H   | 7.799   |
| 53 | N   | 123.207 |

|    |      |         |
|----|------|---------|
| 53 | CA   | 64.432  |
| 53 | C    | 179.241 |
| 53 | CB   | 37.154  |
| 53 | CD1  | 12.459  |
| 53 | CG2  | 17.301  |
| 53 | CG1  | 28.91   |
| 53 | HG2  | 0.924   |
| 53 | HA   | 3.876   |
| 53 | HB   | 2.142   |
| 53 | HD1  | 0.923   |
| 53 | HG12 | 1.676   |
| 53 | HG13 | 1.273   |
| 54 | H    | 8.412   |
| 54 | N    | 121.407 |
| 54 | CA   | 59.615  |
| 54 | C    | 179.647 |
| 54 | CG   | 28.908  |
| 54 | CB   | 30.633  |
| 54 | CD   | 43.436  |
| 54 | HA   | 4.088   |
| 54 | HD   | 3.293   |
| 54 | HG2  | 1.757   |
| 54 | HB2  | 2.057   |
| 54 | HB3  | 1.967   |
| 54 | HG3  | 2.135   |
| 55 | H    | 9.05    |
| 55 | N    | 121.118 |
| 55 | CA   | 59.035  |
| 55 | CB   | 41.718  |
| 55 | CD1  | 25.54   |
| 55 | CG   | 27.968  |
| 55 | HD1  | 0.917   |
| 55 | HA   | 4.332   |
| 55 | HD2  | 0.849   |
| 55 | CD2  | 25.139  |
| 55 | C    | 178.416 |
| 55 | HB2  | 1.837   |
| 55 | HB3  | 1.714   |
| 56 | H    | 7.875   |
| 56 | N    | 117.969 |
| 56 | CA   | 57.927  |
| 56 | HA   | 4.284   |
| 56 | HB2  | 2.276   |
| 56 | HG   | 2.698   |
| 56 | CB   | 31.317  |
| 56 | CG   | 32.369  |
| 56 | C    | 178.301 |

|    |     |         |
|----|-----|---------|
| 56 | HE  | 2.136   |
| 56 | CE  | 17.028  |
| 56 | HB3 | 2.226   |
| 57 | H   | 7.609   |
| 57 | N   | 119.532 |
| 57 | CA  | 59.77   |
| 57 | CB  | 29.52   |
| 57 | CG  | 27.597  |
| 57 | CD  | 43.29   |
| 57 | HA  | 4.096   |
| 57 | HD  | 3.022   |
| 57 | C   | 180.458 |
| 57 | HG  | 1.472   |
| 57 | HB2 | 1.776   |
| 57 | HB3 | 1.892   |
| 58 | H   | 8.207   |
| 58 | N   | 121.82  |
| 58 | CA  | 61.063  |
| 58 | HE1 | 11.047  |
| 58 | NE1 | 131.242 |
| 58 | CB  | 28.348  |
| 58 | HA  | 4.465   |
| 58 | HB3 | 3.463   |
| 58 | HB2 | 3.249   |
| 58 | C   | 177.973 |
| 58 | HD1 | 7.173   |
| 58 | HZ2 | 6.892   |
| 58 | CZ2 | 114.081 |
| 58 | CD1 | 126.072 |
| 58 | CH2 | 123.433 |
| 58 | HH2 | 6.497   |
| 59 | H   | 8.599   |
| 59 | N   | 121.654 |
| 59 | CA  | 59.044  |
| 59 | CB  | 40.851  |
| 59 | HA  | 4.274   |
| 59 | HD1 | 0.782   |
| 59 | CD1 | 23.472  |
| 59 | CD2 | 25.843  |
| 59 | HD2 | 0.988   |
| 59 | C   | 178.823 |
| 59 | HG  | 1.564   |
| 59 | HB3 | 1.493   |
| 59 | HB2 | 2.322   |
| 60 | H   | 7.909   |
| 60 | N   | 116.952 |
| 60 | CA  | 59.755  |

|    |     |         |
|----|-----|---------|
| 60 | CB  | 30.083  |
| 60 | HA  | 4.389   |
| 60 | HB  | 3.273   |
| 60 | C   | 177.635 |
| 60 | HD2 | 7.11    |
| 60 | CD2 | 119.426 |
| 61 | H   | 8.142   |
| 61 | N   | 123.194 |
| 61 | CA  | 62.541  |
| 61 | HE1 | 9.936   |
| 61 | NE1 | 128.398 |
| 61 | CB  | 28.839  |
| 61 | HA  | 4.032   |
| 61 | C   | 179.298 |
| 61 | HB2 | 3.005   |
| 61 | HB3 | 3.724   |
| 61 | HZ2 | 7.339   |
| 61 | CZ2 | 113.508 |
| 61 | CE3 | 120.243 |
| 61 | HE3 | 6.648   |
| 61 | HD1 | 7.104   |
| 61 | HH2 | 7.092   |
| 61 | CD1 | 126.577 |
| 61 | CH2 | 124.097 |
| 61 | CZ3 | 122.068 |
| 61 | HZ3 | 6.431   |
| 62 | H   | 9.447   |
| 62 | N   | 120.038 |
| 62 | CA  | 63.629  |
| 62 | CB  | 38.664  |
| 62 | HA  | 4.205   |
| 62 | C   | 179.08  |
| 62 | HB3 | 3.368   |
| 62 | HB2 | 3.29    |
| 62 | HE  | 6.893   |
| 62 | HZ  | 7.008   |
| 62 | CD  | 131.994 |
| 62 | CE  | 131.336 |
| 62 | HD  | 7.2     |
| 62 | CZ  | 129.923 |
| 63 | H   | 8.665   |
| 63 | N   | 118.56  |
| 63 | CA  | 59.257  |
| 63 | CB  | 29.697  |
| 63 | C   | 181.328 |
| 63 | CG  | 27.801  |
| 63 | CD  | 43.124  |

|    |     |         |
|----|-----|---------|
| 63 | HA  | 4.258   |
| 63 | HD  | 3.332   |
| 63 | HG  | 1.844   |
| 63 | HB  | 1.988   |
| 64 | H   | 8.69    |
| 64 | N   | 122.759 |
| 64 | CA  | 58.651  |
| 64 | C   | 177.595 |
| 64 | CB  | 31.51   |
| 64 | CG  | 24.38   |
| 64 | CD  | 29.156  |
| 64 | HA  | 4.019   |
| 64 | HG  | 1.348   |
| 64 | HD2 | 1.576   |
| 64 | HB3 | 1.73    |
| 64 | HB2 | 1.837   |
| 64 | CE  | 42.01   |
| 64 | HE  | 2.894   |
| 64 | HD3 | 1.547   |
| 65 | H   | 7.246   |
| 65 | N   | 115.681 |
| 65 | CA  | 53.685  |
| 65 | CB  | 39.038  |
| 65 | C   | 173.405 |
| 65 | HA  | 4.532   |
| 65 | HB2 | 2.723   |
| 65 | HB3 | 2.139   |
| 66 | H   | 7.603   |
| 66 | N   | 105.186 |
| 66 | CA  | 45.539  |
| 66 | HA2 | 4.007   |
| 66 | HA3 | 3.578   |
| 66 | C   | 173.869 |
| 67 | H   | 8.248   |
| 67 | N   | 119.699 |
| 67 | CA  | 57.858  |
| 67 | CB  | 38.564  |
| 67 | HA  | 4.542   |
| 67 | HB3 | 2.994   |
| 67 | HB2 | 2.607   |
| 67 | C   | 175.838 |
| 67 | CD  | 133.519 |
| 67 | HD  | 7.288   |
| 67 | HE  | 6.88    |
| 67 | CE  | 118.34  |
| 68 | H   | 8.55    |
| 68 | N   | 125.588 |

|    |     |         |
|----|-----|---------|
| 68 | CA  | 55.649  |
| 68 | CB  | 28.357  |
| 68 | C   | 174.479 |
| 68 | CG  | 27.198  |
| 68 | CD  | 43.577  |
| 68 | HA  | 4.389   |
| 68 | HD  | 3.199   |
| 68 | HB3 | 1.873   |
| 68 | HG3 | 1.638   |
| 68 | HB2 | 1.714   |
| 68 | HG2 | 1.533   |
| 69 | H   | 7.421   |
| 69 | N   | 122.034 |
| 69 | CA  | 53.367  |
| 69 | CB  | 44.286  |
| 69 | C   | 175.63  |
| 69 | HD1 | 0.302   |
| 69 | HB2 | 1.408   |
| 69 | HG  | 1.242   |
| 69 | CD1 | 25.219  |
| 69 | CG  | 26.91   |
| 69 | CD2 | 24.607  |
| 69 | HB3 | 1.282   |
| 69 | HD2 | 0.109   |
| 69 | HA  | 4.711   |
| 70 | H   | 8.163   |
| 70 | N   | 109.789 |
| 70 | CA  | 59.377  |
| 70 | CB  | 72.18   |
| 70 | CG2 | 21.557  |
| 70 | HG2 | 1.154   |
| 70 | HB  | 4.566   |
| 70 | HA  | 4.721   |
| 70 | C   | 174.636 |
| 71 | H   | 8.825   |
| 71 | N   | 122.563 |
| 71 | CA  | 58.196  |
| 71 | C   | 178.632 |
| 71 | CB  | 41.94   |
| 71 | HA  | 3.885   |
| 71 | HB2 | 1.887   |
| 71 | HB3 | 1.678   |
| 71 | HD1 | 1.003   |
| 71 | CD1 | 25.842  |
| 71 | CG  | 26.942  |
| 71 | HD2 | 1.012   |
| 71 | CD2 | 24.186  |

|    |     |         |
|----|-----|---------|
| 71 | HG  | 1.751   |
| 72 | H   | 8.244   |
| 72 | N   | 115.949 |
| 72 | CA  | 59.147  |
| 72 | CB  | 29.631  |
| 72 | C   | 178.893 |
| 72 | CD  | 43.139  |
| 72 | CG  | 26.998  |
| 72 | HA  | 3.876   |
| 72 | HD  | 3.188   |
| 72 | HB2 | 1.868   |
| 72 | HG  | 1.671   |
| 72 | HB3 | 1.749   |
| 73 | H   | 7.461   |
| 73 | N   | 117.665 |
| 73 | CA  | 59.092  |
| 73 | CB  | 29.739  |
| 73 | CG  | 37.997  |
| 73 | HG  | 2.221   |
| 73 | HA  | 3.951   |
| 73 | C   | 178.762 |
| 73 | HB3 | 2.23    |
| 73 | HB2 | 1.896   |
| 74 | H   | 7.413   |
| 74 | N   | 117.724 |
| 74 | CA  | 57.469  |
| 74 | CB  | 41.619  |
| 74 | C   | 179.355 |
| 74 | HA  | 3.898   |
| 74 | HG  | 1.377   |
| 74 | CD2 | 25.441  |
| 74 | HD1 | -0.776  |
| 74 | HD2 | 0.376   |
| 74 | CD1 | 19.863  |
| 74 | HB3 | 1.896   |
| 74 | HB2 | 1.194   |
| 74 | CG  | 25.793  |
| 75 | H   | 8.086   |
| 75 | N   | 114.976 |
| 75 | CA  | 60.638  |
| 75 | CB  | 39.688  |
| 75 | C   | 176.656 |
| 75 | HA  | 4.054   |
| 75 | HB  | 2.964   |
| 75 | CE  | 118.139 |
| 75 | HE  | 6.795   |
| 75 | CD  | 133.053 |

|    |     |         |
|----|-----|---------|
| 75 | HD  | 7.115   |
| 76 | H   | 7.776   |
| 76 | N   | 119.116 |
| 76 | CA  | 54.468  |
| 76 | CB  | 18.535  |
| 76 | C   | 178.156 |
| 76 | HA  | 4.052   |
| 76 | HB  | 1.505   |
| 77 | H   | 6.706   |
| 77 | N   | 116.862 |
| 77 | CA  | 49.713  |
| 77 | CB  | 19.226  |
| 77 | C   | 173.737 |
| 77 | HB  | 1.322   |
| 78 | HA  | 5.018   |
| 78 | CA  | 61.523  |
| 78 | CB  | 28.845  |
| 78 | HB2 | 2.083   |
| 78 | HB3 | 1.921   |
| 78 | HD  | 3.566   |
| 78 | CD  | 48.3    |
| 78 | HG  | 2.113   |
| 78 | CG  | 27.319  |
| 79 | H   | 7.664   |
| 79 | N   | 111.947 |
| 79 | CA  | 58.059  |
| 79 | CB  | 72.247  |
| 79 | C   | 173     |
| 79 | HB  | 4.496   |
| 79 | HG2 | 0.85    |
| 79 | HA  | 4.396   |
| 79 | CG2 | 21.176  |
| 80 | H   | 9.609   |
| 80 | N   | 123.227 |
| 80 | CA  | 58.209  |
| 80 | CB  | 41.579  |
| 80 | HA  | 3.747   |
| 80 | HG  | 1.616   |
| 80 | CG  | 27.005  |
| 80 | CD1 | 24.943  |
| 80 | HD1 | 0.643   |
| 80 | HD2 | 0.587   |
| 80 | CD2 | 23.965  |
| 80 | C   | 179.028 |
| 80 | HB3 | 1.918   |
| 80 | HB2 | 1.602   |
| 81 | H   | 8.831   |



|    |     |         |
|----|-----|---------|
| 81 | N   | 119.663 |
| 81 | CA  | 54.876  |
| 81 | CB  | 18.428  |
| 81 | C   | 181.038 |
| 81 | HB  | 1.308   |
| 81 | HA  | 4.141   |
| 82 | H   | 8.272   |
| 82 | N   | 122.181 |
| 82 | CA  | 54.808  |
| 82 | CB  | 19.088  |
| 82 | C   | 181.868 |
| 82 | HA  | 4.225   |
| 82 | HB  | 1.672   |
| 83 | H   | 9.378   |
| 83 | N   | 123.399 |
| 83 | CA  | 59.562  |
| 83 | C   | 178.633 |
| 83 | HE1 | 10.016  |
| 83 | NE1 | 127.824 |
| 83 | CB  | 28.301  |
| 83 | HB3 | 3.117   |
| 83 | HB2 | 3.32    |
| 83 | HA  | 4.543   |
| 83 | HE3 | 7.266   |
| 83 | HZ2 | 6.798   |
| 83 | HZ3 | 5.96    |
| 83 | CH2 | 123.41  |
| 83 | HH2 | 6.577   |
| 83 | CZ2 | 112.348 |
| 83 | CZ3 | 120.07  |
| 83 | HD1 | 7.274   |
| 83 | CD1 | 124.608 |
| 83 | CE3 | 119.972 |
| 84 | H   | 9.136   |
| 84 | N   | 118.25  |
| 84 | CA  | 57.096  |
| 84 | CB  | 39.229  |
| 84 | C   | 177.231 |
| 84 | HA  | 4.616   |
| 84 | HB3 | 2.828   |
| 84 | HB2 | 2.96    |
| 85 | H   | 7.511   |
| 85 | N   | 116.261 |
| 85 | CA  | 58.748  |
| 85 | CB  | 27.84   |
| 85 | C   | 179.455 |
| 85 | CG  | 33.444  |

|    |     |         |
|----|-----|---------|
| 85 | HA  | 4.011   |
| 85 | HB2 | 2.514   |
| 85 | HB3 | 2.24    |
| 86 | H   | 8.172   |
| 86 | N   | 121.554 |
| 86 | CA  | 57.804  |
| 86 | CB  | 41.915  |
| 86 | C   | 179.171 |
| 86 | HA  | 4.041   |
| 86 | CD1 | 25.688  |
| 86 | HG  | 1.769   |
| 86 | HD2 | 0.744   |
| 86 | CD2 | 23.026  |
| 86 | HD1 | 0.685   |
| 86 | HB2 | 1.22    |
| 86 | HB3 | 1.945   |
| 86 | CG  | 26.63   |
| 87 | H   | 8.197   |
| 87 | N   | 117.874 |
| 87 | CA  | 59.481  |
| 87 | C   | 178.221 |
| 87 | HA  | 3.752   |
| 87 | CB  | 34.875  |
| 87 | CG  | 32.651  |
| 87 | HG  | 2.637   |
| 87 | HB2 | 2.157   |
| 87 | HB3 | 2.443   |
| 87 | HE  | 2.053   |
| 87 | CE  | 16.956  |
| 88 | H   | 7.902   |
| 88 | N   | 117.598 |
| 88 | CA  | 57.076  |
| 88 | CB  | 42.395  |
| 88 | C   | 179.237 |
| 88 | CG  | 26.598  |
| 88 | CD1 | 25.324  |
| 88 | HA  | 4.054   |
| 88 | HB3 | 1.763   |
| 88 | HD1 | 0.721   |
| 88 | HB2 | 1.482   |
| 88 | CD2 | 22.626  |
| 88 | HD2 | 0.59    |
| 88 | HG  | 1.59    |
| 89 | H   | 7.958   |
| 89 | N   | 113.195 |
| 89 | CA  | 59.901  |
| 89 | CB  | 63.834  |

|    |     |         |
|----|-----|---------|
| 89 | C   | 175.09  |
| 89 | HA  | 4.038   |
| 89 | HB  | 4.462   |
| 90 | H   | 7.923   |
| 90 | N   | 122.031 |
| 90 | CA  | 53.905  |
| 90 | CB  | 29.631  |
| 90 | C   | 175.695 |
| 90 | CG  | 26.798  |
| 90 | CD  | 42.219  |
| 90 | HD  | 3.168   |
| 90 | HA  | 4.701   |
| 90 | HG3 | 1.694   |
| 90 | HG2 | 1.845   |
| 90 | HB2 | 1.844   |
| 90 | HB3 | 2.063   |
| 91 | H   | 7.752   |
| 91 | N   | 117.191 |
| 91 | CA  | 57.104  |
| 91 | CB  | 63.437  |
| 91 | C   | 172.914 |
| 92 | CA  | 63.414  |
| 92 | HA  | 4.42    |
| 92 | HB2 | 2.14    |
| 92 | CB  | 31.895  |
| 92 | CG  | 27.278  |
| 92 | CD  | 50.689  |
| 92 | HD2 | 3.59    |
| 92 | HB3 | 1.948   |
| 92 | HG2 | 1.737   |
| 92 | HG3 | 1.869   |
| 92 | HD3 | 3.378   |
| 93 | H   | 8.068   |
| 93 | N   | 126.257 |
| 93 | CA  | 58.086  |
| 93 | CB  | 31.203  |
| 93 | C   | 181.226 |
| 93 | CG  | 36.519  |
| 93 | HA  | 4.237   |
| 93 | HB  | 2.227   |
| 93 | HG2 | 2.035   |
| 93 | HG3 | 1.889   |
| 21 | H 1 | 8.569   |
| 21 | N 1 | 120.916 |
| 22 | H 1 | 8.29    |
| 22 | N 1 | 117.73  |
| 25 | H 1 | 8.066   |

|    |   |   |         |
|----|---|---|---------|
| 25 | N | 1 | 116.66  |
| 29 | H | 1 | 7.978   |
| 29 | N | 1 | 117.707 |
| 44 | H | 1 | 8.756   |
| 44 | N | 1 | 123.214 |
| 45 | H | 1 | 9.441   |
| 45 | N | 1 | 128.805 |
| 51 | H | 1 | 7.21    |
| 51 | N | 1 | 122.77  |
| 52 | H | 1 | 8.952   |
| 52 | N | 1 | 113.24  |
| 53 | H | 1 | 7.874   |
| 53 | N | 1 | 122.857 |
| 54 | H | 1 | 8.484   |
| 54 | N | 1 | 121.605 |
| 55 | H | 1 | 9.109   |
| 55 | N | 1 | 120.901 |
| 57 | H | 1 | 7.698   |
| 57 | N | 1 | 119.988 |
| 58 | H | 1 | 8.27    |
| 58 | N | 1 | 121.808 |
| 59 | H | 1 | 8.467   |
| 59 | N | 1 | 120.953 |
| 60 | H | 1 | 8.006   |
| 60 | N | 1 | 116.822 |
| 61 | H | 1 | 8.104   |
| 61 | N | 1 | 122.826 |
| 62 | H | 1 | 9.342   |
| 62 | N | 1 | 119.676 |
| 63 | H | 1 | 8.626   |
| 63 | N | 1 | 118.583 |
| 68 | H | 1 | 8.819   |
| 68 | N | 1 | 125.992 |
| 69 | H | 1 | 7.47    |
| 69 | N | 1 | 122.82  |
| 70 | H | 1 | 8.069   |
| 70 | N | 1 | 109.71  |
| 84 | H | 1 | 9.08    |
| 84 | N | 1 | 117.898 |
| 86 | H | 1 | 8.088   |
| 86 | N | 1 | 120.785 |
| 90 | H | 1 | 7.865   |
| 90 | N | 1 | 122.359 |
| 91 | H | 1 | 7.678   |
| 91 | N | 1 | 117.189 |
| 93 | H | 1 | 8.181   |
| 93 | N | 1 | 126.248 |

Loaded-ArCP (BMRB 25787 ; residues after 100 belong to the second minor conformer)

| residue number | Nucleus | Chemical Shift (ppm) |
|----------------|---------|----------------------|
| 14             | H       | 8.561                |
| 14             | N       | 122.878              |
| 14             | CA      | 54.291               |
| 14             | CB      | 41.082               |
| 14             | C       | 176.262              |
| 14             | HB2     | 2.746                |
| 14             | HB3     | 2.676                |
| 14             | HA      | 4.646                |
| 15             | H       | 8.415                |
| 15             | N       | 119.829              |
| 15             | CA      | 53.57                |
| 15             | CB      | 38.66                |
| 15             | C       | 175.877              |
| 15             | HA      | 4.728                |
| 15             | HB2     | 2.874                |
| 15             | HB3     | 2.808                |
| 16             | H       | 8.338                |
| 16             | CA      | 57.723               |
| 16             | HA      | 4.218                |
| 16             | CD      | 43.359               |
| 16             | CB      | 30.262               |
| 16             | CG      | 26.882               |
| 16             | HB      | 1.851                |
| 16             | HG      | 1.625                |
| 16             | HD      | 3.202                |
| 16             | N       | 122.04               |
| 17             | H       | 8.39                 |
| 17             | N       | 118.569              |
| 17             | CA      | 58.376               |
| 17             | CB      | 30.352               |
| 17             | HA      | 4.575                |
| 17             | HB3     | 3.149                |
| 17             | HB2     | 3.272                |
| 17             | HD2     | 7.026                |
| 17             | CD2     | 119.256              |
| 18             | H       | 8.427                |
| 18             | N       | 122.055              |
| 18             | CA      | 54.286               |
| 18             | C       | 179.956              |
| 18             | CB      | 18.815               |
| 18             | HB      | 1.581                |
| 18             | HA      | 4.188                |

|    |     |         |
|----|-----|---------|
| 19 | H   | 8.397   |
| 19 | N   | 122.616 |
| 19 | CA  | 55.05   |
| 19 | CB  | 18.336  |
| 19 | HB  | 1.571   |
| 19 | HA  | 4.276   |
| 20 | H   | 8.305   |
| 20 | N   | 118.761 |
| 20 | HB  | 2.923   |
| 20 | CB  | 40.145  |
| 20 | CA  | 56.649  |
| 20 | HA  | 4.832   |
| 21 | H   | 8.662   |
| 21 | N   | 120.921 |
| 21 | CA  | 61.89   |
| 21 | CB  | 38.556  |
| 21 | C   | 176.215 |
| 21 | HA  | 4.055   |
| 21 | HB  | 3.009   |
| 21 | CD  | 132.817 |
| 21 | HE  | 7.009   |
| 21 | HD  | 6.672   |
| 21 | CE  | 117.803 |
| 22 | H   | 8.23    |
| 22 | N   | 117.709 |
| 22 | CA  | 59.121  |
| 22 | C   | 178.263 |
| 22 | CB  | 27.518  |
| 22 | CG  | 33.242  |
| 22 | HA  | 3.83    |
| 22 | HG  | 2.496   |
| 22 | HB  | 2.226   |
| 23 | H   | 7.998   |
| 23 | N   | 118.536 |
| 23 | CA  | 59.071  |
| 23 | C   | 177.48  |
| 23 | CB  | 28.888  |
| 23 | CG  | 34.783  |
| 23 | HA  | 4.098   |
| 23 | HG  | 2.661   |
| 23 | HB2 | 2.446   |
| 23 | HB3 | 2.364   |
| 24 | H   | 8.015   |
| 24 | N   | 121.913 |
| 24 | CA  | 58.095  |
| 24 | CB  | 41.718  |
| 24 | HB2 | 1.904   |

|    |     |         |
|----|-----|---------|
| 24 | CD1 | 27.113  |
| 24 | HD1 | 0.977   |
| 24 | CD2 | 23.616  |
| 24 | HD2 | 0.064   |
| 24 | HA  | 3.439   |
| 24 | HB3 | 1.338   |
| 25 | H   | 7.973   |
| 25 | N   | 116.667 |
| 25 | CA  | 60.24   |
| 25 | CB  | 29.861  |
| 25 | C   | 177.48  |
| 25 | CG  | 29.942  |
| 25 | CD  | 43.643  |
| 25 | HB  | 1.579   |
| 25 | HG  | 1.21    |
| 25 | HD  | 3.028   |
| 25 | HA  | 3.397   |
| 26 | H   | 8.145   |
| 26 | N   | 115.926 |
| 26 | CA  | 59.525  |
| 26 | CB  | 29.41   |
| 26 | HA  | 3.83    |
| 26 | CG  | 36.652  |
| 26 | HB2 | 2.008   |
| 26 | HB3 | 2.111   |
| 26 | HG2 | 2.271   |
| 26 | HG3 | 2.459   |
| 27 | H   | 8.265   |
| 27 | N   | 118.785 |
| 27 | CA  | 59.03   |
| 27 | CB  | 30.091  |
| 27 | C   | 179.27  |
| 27 | CG  | 28.063  |
| 27 | CD  | 43.037  |
| 27 | HA  | 4.141   |
| 27 | HG2 | 1.837   |
| 27 | HB  | 1.979   |
| 27 | HD2 | 2.757   |
| 27 | HD3 | 2.989   |
| 27 | HG3 | 1.647   |
| 28 | H   | 8.384   |
| 28 | N   | 122.113 |
| 28 | CA  | 58.589  |
| 28 | CB  | 42.536  |
| 28 | C   | 178.766 |
| 28 | HD1 | 0.321   |
| 28 | CD1 | 26.662  |

|    |     |         |
|----|-----|---------|
| 28 | HA  | 4.101   |
| 28 | CD2 | 24.212  |
| 28 | HD2 | 0.446   |
| 28 | HB3 | 1.737   |
| 28 | HB2 | 0.952   |
| 28 | HG  | 1.338   |
| 28 | CG  | 26.94   |
| 29 | H   | 7.905   |
| 29 | N   | 117.57  |
| 29 | CA  | 66.197  |
| 29 | CB  | 37.796  |
| 29 | C   | 177.984 |
| 29 | CG2 | 17.23   |
| 29 | HG2 | 0.758   |
| 29 | HA  | 3.34    |
| 29 | CD1 | 14.147  |
| 29 | CG1 | 30.628  |
| 29 | HD1 | 0.722   |
| 29 | HB  | 1.868   |
| 30 | H   | 7.282   |
| 30 | N   | 116.386 |
| 30 | CA  | 58.432  |
| 30 | CB  | 28.722  |
| 30 | C   | 179.376 |
| 30 | HA  | 4.161   |
| 30 | CG  | 33.619  |
| 30 | HB  | 2.199   |
| 30 | HG2 | 2.429   |
| 30 | HG3 | 2.551   |
| 31 | H   | 8.811   |
| 31 | N   | 120.289 |
| 31 | CA  | 59.393  |
| 31 | CB  | 30.477  |
| 31 | C   | 178.395 |
| 31 | CG  | 36.662  |
| 31 | HA  | 4.03    |
| 31 | HG2 | 2.449   |
| 31 | HG3 | 2.231   |
| 31 | HB  | 2.117   |
| 32 | H   | 8.104   |
| 32 | N   | 115.14  |
| 32 | CA  | 54.115  |
| 32 | C   | 176.138 |
| 32 | CD1 | 21.576  |
| 32 | HD1 | 0.688   |
| 32 | HA  | 4.382   |
| 32 | HG  | 1.511   |



|    |     |         |
|----|-----|---------|
| 32 | CD2 | 26.066  |
| 32 | CB  | 41.35   |
| 32 | HD2 | 0.678   |
| 32 | HB3 | 1.693   |
| 32 | HB2 | 1.772   |
| 33 | H   | 7.79    |
| 33 | N   | 116.74  |
| 33 | CA  | 53.952  |
| 33 | CB  | 36.926  |
| 33 | C   | 174.288 |
| 33 | HB2 | 2.743   |
| 33 | HA  | 4.451   |
| 33 | HB3 | 3.151   |
| 34 | H   | 7.743   |
| 34 | N   | 117.167 |
| 34 | CA  | 53.113  |
| 34 | CB  | 44.723  |
| 34 | C   | 176.54  |
| 34 | HA  | 4.807   |
| 34 | HB2 | 1.425   |
| 34 | CG  | 26.614  |
| 34 | HD1 | 0.71    |
| 34 | HD2 | 0.803   |
| 34 | CD2 | 22.477  |
| 34 | CD1 | 26.954  |
| 34 | HB3 | 1.537   |
| 35 | H   | 7.991   |
| 35 | N   | 110.801 |
| 35 | CA  | 59.532  |
| 35 | CB  | 68.634  |
| 35 | HG2 | 1.251   |
| 35 | CG2 | 21.759  |
| 35 | HB  | 4.564   |
| 35 | HA  | 4.806   |
| 36 | CA  | 65.653  |
| 36 | HA  | 4.077   |
| 36 | CB  | 31.762  |
| 36 | CG  | 27.782  |
| 36 | HB2 | 2.378   |
| 36 | HB3 | 1.935   |
| 36 | HG2 | 2.216   |
| 36 | HG3 | 2.016   |
| 36 | CD  | 50.23   |
| 36 | HD  | 3.875   |
| 37 | H   | 7.998   |
| 37 | N   | 112.861 |
| 37 | CA  | 57.896  |

|    |     |         |
|----|-----|---------|
| 37 | CB  | 27.971  |
| 37 | CG  | 34.244  |
| 37 | HA  | 4.097   |
| 37 | HB  | 2.043   |
| 37 | HG2 | 2.39    |
| 37 | HG3 | 2.483   |
| 38 | H   | 7.654   |
| 38 | N   | 116.463 |
| 38 | CA  | 56.42   |
| 38 | C   | 175.595 |
| 38 | CB  | 31.149  |
| 38 | CG  | 34.691  |
| 38 | HG  | 2.358   |
| 38 | HA  | 4.184   |
| 38 | HB  | 2.153   |
| 39 | H   | 7.268   |
| 39 | N   | 120.715 |
| 39 | HD1 | 0.634   |
| 39 | CD1 | 26.458  |
| 39 | CD2 | 22.995  |
| 39 | HD2 | 0.641   |
| 39 | CA  | 53.979  |
| 39 | CB  | 41.823  |
| 39 | HB3 | 1.001   |
| 39 | HA  | 4.379   |
| 39 | HB2 | 1.72    |
| 39 | HG  | 1.255   |
| 39 | CG  | 26.879  |
| 40 | H   | 8.17    |
| 40 | N   | 124.732 |
| 40 | CA  | 54.768  |
| 40 | HB3 | 3.156   |
| 40 | HB2 | 3.263   |
| 40 | CB  | 31.33   |
| 40 | HE1 | 8.073   |
| 40 | CE1 | 137.492 |
| 40 | HA  | 4.83    |
| 42 | H   | 8.805   |
| 42 | N   | 113.74  |
| 42 | CA  | 55.317  |
| 42 | CG  | 36.047  |
| 42 | CB  | 29.196  |
| 42 | HG  | 1.91    |
| 42 | HA  | 4.543   |
| 42 | HB2 | 2.248   |
| 42 | HB3 | 1.908   |
| 43 | H   | 7.472   |

|    |      |         |
|----|------|---------|
| 43 | N    | 118.02  |
| 43 | CA   | 60.206  |
| 43 | CB   | 62.807  |
| 43 | HA   | 4.088   |
| 43 | HB2  | 3.724   |
| 43 | HB3  | 3.64    |
| 44 | H    | 8.8     |
| 44 | N    | 123.274 |
| 44 | CA   | 54.003  |
| 44 | C    | 176.885 |
| 44 | CB   | 38.449  |
| 44 | HA   | 4.394   |
| 44 | HB3  | 2.716   |
| 44 | HB2  | 2.815   |
| 45 | H    | 9.382   |
| 45 | N    | 128.761 |
| 45 | CA   | 57.144  |
| 45 | CB   | 42.295  |
| 45 | HA   | 3.745   |
| 45 | HD1  | 0.4     |
| 45 | HB2  | 1.101   |
| 45 | CG   | 26.405  |
| 45 | HG   | 1.379   |
| 45 | CD1  | 22.645  |
| 45 | CD2  | 23.71   |
| 45 | HD2  | -0.618  |
| 45 | HB3  | 1.026   |
| 46 | H    | 7.672   |
| 46 | N    | 119.381 |
| 46 | CA   | 63.686  |
| 46 | CB   | 36.706  |
| 46 | C    | 180.905 |
| 46 | CG1  | 28.032  |
| 46 | CG2  | 16.843  |
| 46 | HG2  | 1.001   |
| 46 | HA   | 4.263   |
| 46 | HB   | 2.222   |
| 46 | CD1  | 12.474  |
| 46 | HD1  | 0.856   |
| 46 | HG12 | 1.397   |
| 46 | HG13 | 1.54    |
| 47 | H    | 8.157   |
| 47 | N    | 121.8   |
| 47 | CA   | 58.241  |
| 47 | CB   | 28.03   |
| 47 | C    | 177.706 |
| 47 | CG   | 34.056  |

|    |     |         |
|----|-----|---------|
| 47 | HG  | 2.393   |
| 47 | HA  | 4.003   |
| 47 | HB2 | 2.151   |
| 47 | HB3 | 1.955   |
| 48 | H   | 7.441   |
| 48 | N   | 117.705 |
| 48 | CA  | 52.724  |
| 48 | CB  | 18.615  |
| 48 | C   | 176.646 |
| 48 | HB  | 1.41    |
| 48 | HA  | 4.267   |
| 49 | H   | 7.459   |
| 49 | N   | 102.97  |
| 49 | CA  | 44.972  |
| 49 | C   | 174.493 |
| 49 | HA2 | 3.707   |
| 49 | HA3 | 4.567   |
| 50 | H   | 8.543   |
| 50 | N   | 123.062 |
| 50 | CA  | 56.214  |
| 50 | CB  | 41.778  |
| 50 | C   | 173.497 |
| 50 | HB  | 1.494   |
| 50 | HD2 | 0.969   |
| 50 | CD1 | 26.723  |
| 50 | CD2 | 26.931  |
| 50 | HA  | 4.251   |
| 50 | HD1 | 0.862   |
| 50 | HG  | 1.76    |
| 51 | H   | 7.377   |
| 51 | N   | 123.093 |
| 51 | CA  | 52.208  |
| 51 | CB  | 42.248  |
| 51 | HB2 | 2.782   |
| 51 | HA  | 4.872   |
| 51 | C   | 176.23  |
| 51 | HB3 | 3.214   |
| 52 | H   | 8.968   |
| 52 | N   | 113.882 |
| 52 | CA  | 60.898  |
| 52 | HA  | 4.001   |
| 52 | CB  | 67.836  |
| 52 | C   | 176.643 |
| 52 | HZ1 | 6.898   |
| 52 | CL1 | 23.086  |
| 52 | HL3 | 3.911   |
| 52 | CL3 | 77.045  |

|    |      |         |
|----|------|---------|
| 52 | HO   | 3.442   |
| 52 | HL1  | 0.814   |
| 52 | CO   | 37.959  |
| 52 | CT   | 31.029  |
| 52 | HT2  | 3.042   |
| 52 | CS   | 40.999  |
| 52 | HP   | 2.447   |
| 52 | HS   | 3.371   |
| 52 | CP   | 37.961  |
| 52 | HL2  | 0.768   |
| 52 | CL2  | 21.835  |
| 52 | CJ   | 73.754  |
| 52 | HJ2  | 3.25    |
| 52 | HJ3  | 3.662   |
| 52 | CZ1  | 120.156 |
| 52 | HAA  | 7.522   |
| 52 | CAA  | 139.025 |
| 52 | HZ2  | 6.912   |
| 52 | CZ2  | 122.547 |
| 52 | HY2  | 7.722   |
| 52 | CY2  | 131.827 |
| 52 | HB3  | 4.224   |
| 52 | HT3  | 2.969   |
| 52 | HB2  | 4.264   |
| 53 | H    | 7.623   |
| 53 | N    | 123.399 |
| 53 | CA   | 64.365  |
| 53 | C    | 179.524 |
| 53 | CB   | 37.098  |
| 53 | CD1  | 12.426  |
| 53 | CG2  | 17.304  |
| 53 | CG1  | 28.755  |
| 53 | HG2  | 0.907   |
| 53 | HA   | 3.847   |
| 53 | HB   | 2.122   |
| 53 | HD1  | 0.892   |
| 53 | HG12 | 1.646   |
| 53 | HG13 | 1.245   |
| 54 | H    | 8.456   |
| 54 | N    | 121.206 |
| 54 | CA   | 59.59   |
| 54 | C    | 179.604 |
| 54 | CG   | 28.829  |
| 54 | CB   | 30.619  |
| 54 | CD   | 43.09   |
| 54 | HA   | 4.091   |
| 54 | HD   | 3.293   |

|    |     |         |
|----|-----|---------|
| 54 | HG  | 1.769   |
| 54 | HB  | 1.974   |
| 55 | H   | 9.057   |
| 55 | N   | 121.118 |
| 55 | CA  | 59.006  |
| 55 | CB  | 41.668  |
| 55 | CD1 | 25.839  |
| 55 | CG  | 27.968  |
| 55 | HD1 | 1.016   |
| 55 | HA  | 4.39    |
| 55 | HB  | 1.857   |
| 55 | HG  | 1.671   |
| 55 | HD2 | 0.993   |
| 55 | CD2 | 25.318  |
| 56 | H   | 7.954   |
| 56 | N   | 118.071 |
| 56 | CA  | 58.015  |
| 56 | HA  | 4.282   |
| 56 | HB  | 2.279   |
| 56 | HG  | 2.681   |
| 56 | CB  | 31.403  |
| 56 | CG  | 32.408  |
| 56 | HE  | 2.101   |
| 56 | CE  | 17.017  |
| 57 | H   | 7.616   |
| 57 | N   | 119.697 |
| 57 | CA  | 59.793  |
| 57 | CB  | 29.477  |
| 57 | CG  | 27.597  |
| 57 | CD  | 43.325  |
| 57 | HA  | 4.098   |
| 57 | HD  | 3.022   |
| 57 | HB3 | 1.801   |
| 57 | HB2 | 1.893   |
| 57 | HG2 | 1.463   |
| 57 | HG3 | 1.727   |
| 58 | H   | 8.228   |
| 58 | N   | 121.853 |
| 58 | CA  | 61.003  |
| 58 | HE1 | 11.027  |
| 58 | NE1 | 131.116 |
| 58 | CB  | 28.28   |
| 58 | HA  | 4.469   |
| 58 | HB2 | 3.495   |
| 58 | HB3 | 3.257   |
| 58 | HH2 | 6.517   |
| 58 | CH2 | 123.106 |

|    |     |         |
|----|-----|---------|
| 58 | CD1 | 125.879 |
| 58 | CZ2 | 113.928 |
| 58 | HZ2 | 6.901   |
| 58 | HD1 | 7.19    |
| 59 | H   | 8.654   |
| 59 | N   | 121.724 |
| 59 | CA  | 58.987  |
| 59 | CB  | 40.871  |
| 59 | HA  | 4.263   |
| 59 | HD1 | 0.779   |
| 59 | HB2 | 1.494   |
| 59 | CD1 | 23.488  |
| 59 | CD2 | 26.06   |
| 59 | HD2 | 0.962   |
| 59 | HB3 | 2.334   |
| 60 | H   | 7.916   |
| 60 | N   | 117.03  |
| 60 | CA  | 59.804  |
| 60 | CB  | 29.929  |
| 60 | HA  | 4.377   |
| 60 | HB  | 3.281   |
| 60 | HD2 | 7.132   |
| 60 | CD2 | 119.415 |
| 61 | H   | 8.12    |
| 61 | N   | 123.142 |
| 61 | CA  | 62.607  |
| 61 | HE1 | 9.936   |
| 61 | NE1 | 128.434 |
| 61 | CB  | 28.767  |
| 61 | HA  | 4.013   |
| 61 | HB3 | 3.021   |
| 61 | HB2 | 3.745   |
| 61 | HH2 | 7.089   |
| 61 | HZ2 | 7.344   |
| 61 | CH2 | 123.788 |
| 61 | HZ3 | 6.391   |
| 61 | CE3 | 120.176 |
| 61 | CD1 | 126.497 |
| 61 | CZ2 | 113.351 |
| 61 | HE3 | 6.657   |
| 61 | HD1 | 7.109   |
| 61 | CZ3 | 121.919 |
| 62 | H   | 9.446   |
| 62 | N   | 120.033 |
| 62 | CA  | 63.686  |
| 62 | CB  | 38.673  |
| 62 | HA  | 4.195   |

|    |     |         |
|----|-----|---------|
| 62 | HB2 | 3.287   |
| 62 | HE  | 6.89    |
| 62 | HD  | 7.203   |
| 62 | HZ  | 7.047   |
| 62 | CZ  | 129.859 |
| 62 | CD  | 131.514 |
| 62 | CE  | 131.579 |
| 62 | HB3 | 3.382   |
| 63 | H   | 8.681   |
| 63 | N   | 118.582 |
| 63 | CA  | 59.341  |
| 63 | CB  | 29.657  |
| 63 | C   | 181.343 |
| 63 | CG  | 27.997  |
| 63 | CD  | 43.31   |
| 63 | HA  | 4.254   |
| 63 | HD  | 3.306   |
| 63 | HG  | 1.842   |
| 63 | HB  | 1.988   |
| 64 | H   | 8.676   |
| 64 | N   | 122.757 |
| 64 | CA  | 58.695  |
| 64 | C   | 177.573 |
| 64 | CB  | 31.428  |
| 64 | CG  | 24.534  |
| 64 | CD  | 28.956  |
| 64 | HA  | 4.029   |
| 64 | HG  | 1.353   |
| 64 | HD  | 1.575   |
| 64 | HB2 | 1.737   |
| 64 | HB3 | 1.837   |
| 64 | CE  | 41.948  |
| 64 | HE  | 2.878   |
| 65 | H   | 7.234   |
| 65 | N   | 115.716 |
| 65 | CA  | 53.719  |
| 65 | CB  | 39      |
| 65 | C   | 173.44  |
| 65 | HA  | 4.538   |
| 65 | HB2 | 2.725   |
| 65 | HB3 | 2.144   |
| 66 | H   | 7.596   |
| 66 | N   | 105.195 |
| 66 | CA  | 45.537  |
| 66 | HA2 | 4.001   |
| 66 | HA3 | 3.586   |
| 67 | H   | 8.237   |



|    |     |         |
|----|-----|---------|
| 67 | N   | 119.719 |
| 67 | CA  | 57.807  |
| 67 | CB  | 38.5    |
| 67 | HA  | 4.554   |
| 67 | HB2 | 3.004   |
| 67 | HB3 | 2.603   |
| 67 | HD  | 7.296   |
| 67 | CD  | 133.288 |
| 67 | HE  | 6.888   |
| 67 | CE  | 118.149 |
| 68 | H   | 8.53    |
| 68 | N   | 125.606 |
| 68 | CA  | 55.676  |
| 68 | CB  | 28.482  |
| 68 | C   | 174.559 |
| 68 | CG  | 27.198  |
| 68 | CD  | 43.064  |
| 68 | HA  | 4.389   |
| 68 | HD  | 3.197   |
| 68 | HB2 | 1.875   |
| 68 | HG2 | 1.715   |
| 68 | HB3 | 1.635   |
| 68 | HG3 | 1.534   |
| 69 | H   | 7.407   |
| 69 | N   | 122.142 |
| 69 | CA  | 53.341  |
| 69 | CB  | 44.311  |
| 69 | C   | 175.706 |
| 69 | HD1 | 0.321   |
| 69 | HB2 | 1.418   |
| 69 | HG  | 1.257   |
| 69 | CD1 | 25.174  |
| 69 | CD2 | 24.687  |
| 69 | HB3 | 1.275   |
| 69 | HD2 | 0.103   |
| 69 | HA  | 4.713   |
| 70 | H   | 8.152   |
| 70 | N   | 109.735 |
| 70 | CA  | 59.424  |
| 70 | CB  | 72.076  |
| 70 | CG2 | 21.553  |
| 70 | HG2 | 1.15    |
| 70 | HB  | 4.578   |
| 70 | HA  | 4.722   |
| 71 | H   | 8.82    |
| 71 | N   | 122.488 |
| 71 | CA  | 58.343  |

|    |     |         |
|----|-----|---------|
| 71 | C   | 178.622 |
| 71 | CB  | 41.866  |
| 71 | HA  | 3.876   |
| 71 | HB2 | 1.883   |
| 71 | HB3 | 1.678   |
| 71 | HD1 | 0.966   |
| 71 | CD1 | 25.696  |
| 71 | CG  | 25.258  |
| 71 | HD2 | 0.995   |
| 71 | CD2 | 24.332  |
| 72 | H   | 8.268   |
| 72 | N   | 115.907 |
| 72 | CA  | 59.258  |
| 72 | CB  | 29.615  |
| 72 | C   | 178.98  |
| 72 | CD  | 43.125  |
| 72 | CG  | 26.998  |
| 72 | HA  | 3.779   |
| 72 | HD  | 3.162   |
| 72 | HB2 | 1.843   |
| 72 | HG  | 1.649   |
| 72 | HB3 | 1.727   |
| 73 | H   | 7.438   |
| 73 | N   | 117.413 |
| 73 | CA  | 59.103  |
| 73 | CB  | 29.75   |
| 73 | CG  | 37.646  |
| 73 | HG  | 2.224   |
| 73 | HA  | 3.929   |
| 73 | HB2 | 1.875   |
| 73 | HB3 | 2.229   |
| 74 | H   | 7.358   |
| 74 | N   | 117.442 |
| 74 | CA  | 57.395  |
| 74 | CB  | 41.861  |
| 74 | C   | 179.405 |
| 74 | HA  | 3.906   |
| 74 | HG  | 1.358   |
| 74 | CD2 | 25.502  |
| 74 | HD1 | -0.8    |
| 74 | HB3 | 1.208   |
| 74 | HD2 | 0.374   |
| 74 | CD1 | 19.857  |
| 74 | HB2 | 1.365   |
| 74 | CG  | 25.656  |
| 75 | H   | 8.088   |
| 75 | N   | 115.237 |

|    |     |         |
|----|-----|---------|
| 75 | CA  | 60.229  |
| 75 | CB  | 39.484  |
| 75 | C   | 176.882 |
| 75 | HA  | 4.036   |
| 75 | HB3 | 2.825   |
| 75 | HB2 | 2.957   |
| 75 | CD  | 132.673 |
| 75 | CE  | 118.099 |
| 75 | HE  | 6.523   |
| 75 | HD  | 6.845   |
| 76 | H   | 7.793   |
| 76 | N   | 118.861 |
| 76 | CA  | 54.27   |
| 76 | CB  | 18.494  |
| 76 | C   | 178.17  |
| 76 | HA  | 3.948   |
| 76 | HB  | 1.462   |
| 77 | H   | 6.639   |
| 77 | N   | 116.989 |
| 77 | CA  | 49.652  |
| 77 | CB  | 19.173  |
| 77 | C   | 173.807 |
| 77 | HB  | 1.306   |
| 78 | HA  | 5.017   |
| 78 | CA  | 61.518  |
| 78 | CB  | 26.471  |
| 78 | HB2 | 2.07    |
| 78 | CD  | 48.115  |
| 78 | HB3 | 1.912   |
| 78 | HD  | 3.523   |
| 79 | H   | 7.665   |
| 79 | N   | 111.926 |
| 79 | CA  | 58.065  |
| 79 | CB  | 72.268  |
| 79 | C   | 172.978 |
| 79 | HB  | 4.497   |
| 79 | HG2 | 0.845   |
| 79 | HA  | 4.384   |
| 79 | CG2 | 21.105  |
| 80 | H   | 9.616   |
| 80 | N   | 123.225 |
| 80 | CA  | 58.162  |
| 80 | CB  | 41.569  |
| 80 | HA  | 3.742   |
| 80 | HB2 | 1.918   |
| 80 | HG  | 1.607   |
| 80 | CG  | 26.913  |

|    |     |         |
|----|-----|---------|
| 80 | CD1 | 24.948  |
| 80 | HD1 | 0.64    |
| 80 | HD2 | 0.581   |
| 80 | CD2 | 23.885  |
| 80 | HB3 | 1.611   |
| 81 | H   | 8.82    |
| 81 | N   | 119.691 |
| 81 | CA  | 54.95   |
| 81 | CB  | 18.381  |
| 81 | C   | 181.058 |
| 81 | HB  | 1.301   |
| 81 | HA  | 4.145   |
| 82 | H   | 8.251   |
| 82 | N   | 122.226 |
| 82 | CA  | 54.843  |
| 82 | CB  | 19.041  |
| 82 | C   | 181.84  |
| 82 | HA  | 4.22    |
| 82 | HB  | 1.66    |
| 83 | H   | 9.365   |
| 83 | N   | 123.378 |
| 83 | CA  | 59.569  |
| 83 | C   | 178.554 |
| 83 | HE1 | 10.062  |
| 83 | NE1 | 128.06  |
| 83 | CB  | 28.215  |
| 83 | HB2 | 3.129   |
| 83 | HB3 | 3.33    |
| 83 | HA  | 4.535   |
| 83 | HZ3 | 5.99    |
| 83 | CZ3 | 119.584 |
| 83 | CD1 | 124.599 |
| 83 | HD1 | 7.282   |
| 83 | CE3 | 120.21  |
| 83 | CZ2 | 112.159 |
| 83 | HE3 | 7.276   |
| 83 | HH2 | 6.55    |
| 83 | CH2 | 123.184 |
| 83 | HZ2 | 6.812   |
| 84 | H   | 9.144   |
| 84 | N   | 118.259 |
| 84 | CA  | 57.11   |
| 84 | CB  | 39.23   |
| 84 | C   | 177.349 |
| 84 | HA  | 4.617   |
| 84 | HB2 | 2.841   |
| 84 | HB3 | 2.959   |

|    |     |         |
|----|-----|---------|
| 85 | H   | 7.498   |
| 85 | N   | 116.239 |
| 85 | CA  | 58.775  |
| 85 | CB  | 27.824  |
| 85 | C   | 179.442 |
| 85 | HA  | 4.005   |
| 85 | HG  | 2.52    |
| 85 | HB2 | 2.244   |
| 85 | HB3 | 2.501   |
| 86 | H   | 8.166   |
| 86 | N   | 121.605 |
| 86 | CA  | 57.983  |
| 86 | CB  | 41.896  |
| 86 | C   | 179.299 |
| 86 | HA  | 4.04    |
| 86 | HB2 | 1.947   |
| 86 | CD1 | 25.733  |
| 86 | HG  | 1.763   |
| 86 | HD2 | 0.739   |
| 86 | CD2 | 23.043  |
| 86 | HD1 | 0.687   |
| 86 | HB3 | 1.212   |
| 86 | CG  | 26.57   |
| 87 | H   | 8.212   |
| 87 | N   | 117.886 |
| 87 | CA  | 59.509  |
| 87 | C   | 177.891 |
| 87 | HA  | 3.75    |
| 87 | HB2 | 2.149   |
| 87 | CB  | 34.881  |
| 87 | CG  | 32.651  |
| 87 | HG2 | 2.647   |
| 87 | HB3 | 2.443   |
| 87 | HE  | 2.048   |
| 87 | CE  | 16.986  |
| 87 | HG3 | 1.356   |
| 88 | H   | 7.893   |
| 88 | N   | 117.541 |
| 88 | CA  | 57.182  |
| 88 | CB  | 42.4    |
| 88 | C   | 179.033 |
| 88 | CD1 | 25.343  |
| 88 | HA  | 4.059   |
| 88 | HB2 | 1.775   |
| 88 | HD1 | 0.72    |
| 88 | HB3 | 1.475   |
| 88 | CD2 | 22.627  |

|    |     |         |
|----|-----|---------|
| 88 | HD2 | 0.59    |
| 88 | HG  | 1.599   |
| 89 | H   | 7.951   |
| 89 | N   | 113.194 |
| 89 | CA  | 59.957  |
| 89 | CB  | 63.956  |
| 89 | C   | 174.88  |
| 89 | HA  | 4.036   |
| 89 | HB  | 4.727   |
| 90 | H   | 7.913   |
| 90 | N   | 121.967 |
| 90 | CA  | 53.937  |
| 90 | CB  | 29.589  |
| 90 | C   | 175.626 |
| 90 | CG  | 26.798  |
| 90 | CD  | 42.207  |
| 90 | HD  | 3.17    |
| 90 | HA  | 4.705   |
| 90 | HB2 | 2.072   |
| 90 | HG2 | 1.724   |
| 90 | HB3 | 1.839   |
| 90 | HG3 | 1.648   |
| 91 | H   | 7.731   |
| 91 | N   | 117.139 |
| 91 | CA  | 57.077  |
| 91 | CB  | 63.455  |
| 91 | C   | 173.346 |
| 92 | CA  | 63.392  |
| 92 | HA  | 4.423   |
| 92 | HB2 | 2.149   |
| 92 | CB  | 31.895  |
| 92 | CG  | 27.278  |
| 92 | CD  | 50.806  |
| 92 | HD2 | 3.386   |
| 92 | HB3 | 1.873   |
| 92 | HG3 | 1.79    |
| 92 | HG2 | 1.869   |
| 92 | HD3 | 3.595   |
| 93 | H   | 8.056   |
| 93 | N   | 126.242 |
| 93 | CA  | 56.856  |
| 93 | CB  | 31.192  |
| 93 | C   | 176.315 |
| 93 | CG  | 36.519  |
| 93 | HB2 | 2.225   |
| 93 | HG2 | 2.026   |
| 93 | HG3 | 1.877   |

|    |     |         |
|----|-----|---------|
| 93 | HB3 | 2.039   |
| 25 | H 1 | 8.054   |
| 25 | N 1 | 116.632 |
| 26 | H 1 | 8.083   |
| 26 | N 1 | 115.895 |
| 51 | H 1 | 7.167   |
| 51 | N 1 | 122.636 |
| 53 | H 1 | 7.741   |
| 53 | N 1 | 123.271 |
| 54 | H 1 | 8.539   |
| 54 | N 1 | 121.504 |
| 55 | H 1 | 9.111   |
| 55 | N 1 | 120.775 |
| 57 | H 1 | 7.706   |
| 57 | N 1 | 120.162 |
| 58 | H 1 | 8.281   |
| 58 | N 1 | 121.837 |
| 59 | H 1 | 8.5     |
| 59 | N 1 | 120.976 |
| 60 | H 1 | 8.049   |
| 60 | N 1 | 116.875 |
| 61 | H 1 | 8.081   |
| 61 | N 1 | 122.754 |
| 62 | H 1 | 9.338   |
| 62 | N 1 | 119.653 |
| 63 | H 1 | 8.703   |
| 63 | N 1 | 120.126 |
| 64 | H 1 | 8.596   |
| 64 | N 1 | 122.255 |
| 68 | H 1 | 8.808   |
| 68 | N 1 | 126.047 |
| 69 | H 1 | 7.454   |
| 69 | N 1 | 123.012 |
| 70 | H 1 | 8.065   |
| 70 | N 1 | 109.703 |
| 72 | H 1 | 8.187   |
| 72 | N 1 | 116.47  |
| 84 | H 1 | 9.095   |
| 84 | N 1 | 117.844 |
| 86 | H 1 | 8.086   |
| 86 | N 1 | 120.795 |
| 90 | H 1 | 7.85    |
| 90 | N 1 | 122.246 |
| 91 | H 1 | 7.665   |
| 91 | N 1 | 117.178 |
| 93 | H 1 | 8.171   |
| 93 | N 1 | 126.238 |

**PDB coordinates as outputs from CYANA. In this format the post-translational modification is a side-chain of S52. The coordinates deposited in the PDB are those of the water-refined conformers. Only the coordinates of the low energy conformers are provided here.**

**HOLO (PDB 2N6Y):**

| HEADER | STRUCTURE FROM CYANA 2.1                        |      |     |   |    |        | 25-Jun-15 |        | 1PDB |       |
|--------|-------------------------------------------------|------|-----|---|----|--------|-----------|--------|------|-------|
| EXPDTA | NMR, 20 STRUCTURES                              |      |     |   |    |        |           |        |      |       |
| REMARK | 99 B-FACTOR COLUMN STORES ADDITIONAL COORDINATE |      |     |   |    |        | DIGITS.   |        |      |       |
| MODEL  | 1                                               |      |     |   |    |        |           |        |      |       |
| ATOM   | 1                                               | N    | ASP | A | 14 | 1.328  | 0.000     | 0.000  | 1.00 | 4.00  |
| ATOM   | 2                                               | CA   | ASP | A | 14 | 2.093  | -0.001    | -1.242 | 1.00 | 0.02  |
| ATOM   | 3                                               | C    | ASP | A | 14 | 1.305  | -0.669    | -2.364 | 1.00 | 64.43 |
| ATOM   | 4                                               | O    | ASP | A | 14 | 1.150  | -0.106    | -3.447 | 1.00 | 33.41 |
| ATOM   | 5                                               | CB   | ASP | A | 14 | 3.429  | -0.718    | -1.042 | 1.00 | 62.14 |
| ATOM   | 6                                               | CG   | ASP | A | 14 | 4.140  | -0.993    | -2.353 | 1.00 | 73.30 |
| ATOM   | 7                                               | OD1  | ASP | A | 14 | 4.856  | -0.094    | -2.841 | 1.00 | 12.54 |
| ATOM   | 8                                               | OD2  | ASP | A | 14 | 3.981  | -2.109    | -2.891 | 1.00 | 15.12 |
| ATOM   | 9                                               | H    | ASP | A | 14 | 1.806  | -0.000    | 0.856  | 1.00 | 64.11 |
| ATOM   | 10                                              | HA   | ASP | A | 14 | 2.283  | 1.026     | -1.515 | 1.00 | 24.11 |
| ATOM   | 11                                              | 2HB  | ASP | A | 14 | 4.072  | -0.104    | -0.428 | 1.00 | 51.03 |
| ATOM   | 12                                              | 3HB  | ASP | A | 14 | 3.254  | -1.660    | -0.544 | 1.00 | 11.25 |
| ATOM   | 13                                              | N    | ASN | A | 15 | 0.812  | -1.874    | -2.098 | 1.00 | 31.41 |
| ATOM   | 14                                              | CA   | ASN | A | 15 | 0.042  | -2.621    | -3.086 | 1.00 | 53.53 |
| ATOM   | 15                                              | C    | ASN | A | 15 | -1.349 | -2.953    | -2.555 | 1.00 | 11.35 |
| ATOM   | 16                                              | O    | ASN | A | 15 | -1.711 | -2.560    | -1.445 | 1.00 | 63.21 |
| ATOM   | 17                                              | CB   | ASN | A | 15 | 0.775  | -3.908    | -3.469 | 1.00 | 33.04 |
| ATOM   | 18                                              | CG   | ASN | A | 15 | 1.369  | -3.843    | -4.862 | 1.00 | 51.03 |
| ATOM   | 19                                              | ND2  | ASN | A | 15 | 1.092  | -4.859    | -5.671 | 1.00 | 62.13 |
| ATOM   | 20                                              | OD1  | ASN | A | 15 | 2.068  | -2.890    | -5.207 | 1.00 | 62.22 |
| ATOM   | 21                                              | H    | ASN | A | 15 | 0.969  | -2.272    | -1.216 | 1.00 | 4.51  |
| ATOM   | 22                                              | HA   | ASN | A | 15 | -0.060 | -2.000    | -3.964 | 1.00 | 62.52 |
| ATOM   | 23                                              | 2HB  | ASN | A | 15 | 1.576  | -4.081    | -2.765 | 1.00 | 33.53 |
| ATOM   | 24                                              | 3HB  | ASN | A | 15 | 0.082  | -4.735    | -3.430 | 1.00 | 71.03 |
| ATOM   | 25                                              | 1HD2 | ASN | A | 15 | 0.528  | -5.584    | -5.329 | 1.00 | 1.33  |
| ATOM   | 26                                              | 2HD2 | ASN | A | 15 | 1.464  | -4.843    | -6.578 | 1.00 | 0.12  |
| ATOM   | 27                                              | N    | ARG | A | 16 | -2.124 | -3.679    | -3.353 | 1.00 | 53.35 |
| ATOM   | 28                                              | CA   | ARG | A | 16 | -3.476 | -4.063    | -2.964 | 1.00 | 25.42 |
| ATOM   | 29                                              | C    | ARG | A | 16 | -3.453 | -4.934    | -1.711 | 1.00 | 1.01  |
| ATOM   | 30                                              | O    | ARG | A | 16 | -2.438 | -5.018    | -1.019 | 1.00 | 22.22 |
| ATOM   | 31                                              | CB   | ARG | A | 16 | -4.165 | -4.812    | -4.106 | 1.00 | 22.31 |
| ATOM   | 32                                              | CG   | ARG | A | 16 | -4.009 | -4.137    | -5.459 | 1.00 | 22.14 |
| ATOM   | 33                                              | CD   | ARG | A | 16 | -5.327 | -4.095    | -6.216 | 1.00 | 10.15 |
| ATOM   | 34                                              | NE   | ARG | A | 16 | -6.242 | -3.098    | -5.666 | 1.00 | 42.34 |
| ATOM   | 35                                              | CZ   | ARG | A | 16 | -6.066 | -1.788    | -5.798 | 1.00 | 52.34 |
| ATOM   | 36                                              | NH1  | ARG | A | 16 | -5.016 | -1.319    | -6.458 | 1.00 | 62.42 |
| ATOM   | 37                                              | NH2  | ARG | A | 16 | -6.943 | -0.943    | -5.270 | 1.00 | 62.03 |
| ATOM   | 38                                              | H    | ARG | A | 16 | -1.780 | -3.962    | -4.226 | 1.00 | 41.33 |
| ATOM   | 39                                              | HA   | ARG | A | 16 | -4.029 | -3.161    | -2.751 | 1.00 | 31.20 |
| ATOM   | 40                                              | 2HB  | ARG | A | 16 | -3.746 | -5.806    | -4.174 | 1.00 | 13.21 |
| ATOM   | 41                                              | 3HB  | ARG | A | 16 | -5.219 | -4.889    | -3.885 | 1.00 | 42.34 |
| ATOM   | 42                                              | 2HG  | ARG | A | 16 | -3.661 | -3.126    | -5.308 | 1.00 | 4.10  |
| ATOM   | 43                                              | 3HG  | ARG | A | 16 | -3.285 | -4.686    | -6.043 | 1.00 | 13.11 |
| ATOM   | 44                                              | 2HD  | ARG | A | 16 | -5.126 | -3.854    | -7.249 | 1.00 | 30.52 |
| ATOM   | 45                                              | 3HD  | ARG | A | 16 | -5.792 | -5.068    | -6.156 | 1.00 | 43.24 |
| ATOM   | 46                                              | HE   | ARG | A | 16 | -7.025 | -3.422    | -5.175 | 1.00 | 42.10 |
| ATOM   | 47                                              | 1HH1 | ARG | A | 16 | -4.354 | -1.954    | -6.858 | 1.00 | 53.50 |
| ATOM   | 48                                              | 2HH1 | ARG | A | 16 | -4.887 | -0.332    | -6.557 | 1.00 | 64.42 |
| ATOM   | 49                                              | 1HH2 | ARG | A | 16 | -7.736 | -1.292    | -4.772 | 1.00 | 60.35 |
| ATOM   | 50                                              | 2HH2 | ARG | A | 16 | -6.810 | 0.043     | -5.370 | 1.00 | 62.50 |



|      |     |     |     |   |    |        |         |        |      |       |
|------|-----|-----|-----|---|----|--------|---------|--------|------|-------|
| ATOM | 51  | N   | HIS | A | 17 | -4.579 | -5.580  | -1.425 | 1.00 | 11.33 |
| ATOM | 52  | CA  | HIS | A | 17 | -4.689 | -6.444  | -0.255 | 1.00 | 24.10 |
| ATOM | 53  | C   | HIS | A | 17 | -3.518 | -7.421  | -0.190 | 1.00 | 14.01 |
| ATOM | 54  | O   | HIS | A | 17 | -3.001 | -7.714  | 0.888  | 1.00 | 75.24 |
| ATOM | 55  | CB  | HIS | A | 17 | -6.009 | -7.214  | -0.285 | 1.00 | 54.32 |
| ATOM | 56  | CG  | HIS | A | 17 | -7.055 | -6.645  | 0.624  | 1.00 | 22.23 |
| ATOM | 57  | CD2 | HIS | A | 17 | -7.165 | -5.421  | 1.190  | 1.00 | 2.43  |
| ATOM | 58  | ND1 | HIS | A | 17 | -8.152 | -7.363  | 1.051  | 1.00 | 53.22 |
| ATOM | 59  | CE1 | HIS | A | 17 | -8.893 | -6.604  | 1.838  | 1.00 | 0.34  |
| ATOM | 60  | NE2 | HIS | A | 17 | -8.315 | -5.420  | 1.940  | 1.00 | 75.23 |
| ATOM | 61  | H   | HIS | A | 17 | -5.354 | -5.472  | -2.014 | 1.00 | 72.53 |
| ATOM | 62  | HA  | HIS | A | 17 | -4.667 | -5.817  | 0.624  | 1.00 | 73.44 |
| ATOM | 63  | 2HB | HIS | A | 17 | -6.403 | -7.201  | -1.291 | 1.00 | 1.21  |
| ATOM | 64  | 3HB | HIS | A | 17 | -5.830 | -8.237  | 0.013  | 1.00 | 43.41 |
| ATOM | 65  | HD1 | HIS | A | 17 | -8.358 | -8.290  | 0.811  | 1.00 | 54.15 |
| ATOM | 66  | HD2 | HIS | A | 17 | -6.476 | -4.596  | 1.074  | 1.00 | 2.42  |
| ATOM | 67  | HE1 | HIS | A | 17 | -9.814 | -6.900  | 2.318  | 1.00 | 3.25  |
| ATOM | 68  | N   | ALA | A | 18 | -3.107 | -7.922  | -1.350 | 1.00 | 43.20 |
| ATOM | 69  | CA  | ALA | A | 18 | -1.997 | -8.864  | -1.425 | 1.00 | 34.34 |
| ATOM | 70  | C   | ALA | A | 18 | -0.766 | -8.321  | -0.708 | 1.00 | 41.42 |
| ATOM | 71  | O   | ALA | A | 18 | 0.037  | -9.082  | -0.169 | 1.00 | 52.22 |
| ATOM | 72  | CB  | ALA | A | 18 | -1.669 | -9.180  | -2.876 | 1.00 | 54.35 |
| ATOM | 73  | H   | ALA | A | 18 | -3.559 | -7.650  | -2.175 | 1.00 | 50.35 |
| ATOM | 74  | HA  | ALA | A | 18 | -2.306 | -9.781  | -0.943 | 1.00 | 63.54 |
| ATOM | 75  | 1HB | ALA | A | 18 | -1.830 | -8.298  | -3.480 | 1.00 | 72.45 |
| ATOM | 76  | 2HB | ALA | A | 18 | -0.637 | -9.486  | -2.954 | 1.00 | 20.23 |
| ATOM | 77  | 3HB | ALA | A | 18 | -2.309 | -9.977  | -3.225 | 1.00 | 12.33 |
| ATOM | 78  | N   | ALA | A | 19 | -0.623 | -6.999  | -0.707 | 1.00 | 60.31 |
| ATOM | 79  | CA  | ALA | A | 19 | 0.510  | -6.354  | -0.056 | 1.00 | 22.03 |
| ATOM | 80  | C   | ALA | A | 19 | 0.621  | -6.782  | 1.404  | 1.00 | 50.32 |
| ATOM | 81  | O   | ALA | A | 19 | 1.721  | -6.894  | 1.946  | 1.00 | 74.43 |
| ATOM | 82  | CB  | ALA | A | 19 | 0.385  | -4.841  | -0.156 | 1.00 | 43.03 |
| ATOM | 83  | H   | ALA | A | 19 | -1.296 | -6.445  | -1.154 | 1.00 | 35.43 |
| ATOM | 84  | HA  | ALA | A | 19 | 1.409  | -6.652  | -0.577 | 1.00 | 13.11 |
| ATOM | 85  | 1HB | ALA | A | 19 | -0.199 | -4.586  | -1.029 | 1.00 | 23.11 |
| ATOM | 86  | 2HB | ALA | A | 19 | -0.103 | -4.461  | 0.728  | 1.00 | 14.32 |
| ATOM | 87  | 3HB | ALA | A | 19 | 1.369  | -4.404  | -0.241 | 1.00 | 11.20 |
| ATOM | 88  | N   | ASP | A | 20 | -0.524 | -7.018  | 2.035  | 1.00 | 40.24 |
| ATOM | 89  | CA  | ASP | A | 20 | -0.555 | -7.434  | 3.432  | 1.00 | 14.41 |
| ATOM | 90  | C   | ASP | A | 20 | 0.188  | -8.752  | 3.624  | 1.00 | 50.14 |
| ATOM | 91  | O   | ASP | A | 20 | 0.840  | -8.966  | 4.646  | 1.00 | 14.11 |
| ATOM | 92  | CB  | ASP | A | 20 | -2.001 | -7.574  | 3.912  | 1.00 | 23.41 |
| ATOM | 93  | CG  | ASP | A | 20 | -2.297 | -6.707  | 5.120  | 1.00 | 42.13 |
| ATOM | 94  | OD1 | ASP | A | 20 | -1.378 | -6.496  | 5.939  | 1.00 | 43.33 |
| ATOM | 95  | OD2 | ASP | A | 20 | -3.447 | -6.238  | 5.245  | 1.00 | 33.43 |
| ATOM | 96  | H   | ASP | A | 20 | -1.369 | -6.911  | 1.549  | 1.00 | 45.45 |
| ATOM | 97  | HA  | ASP | A | 20 | -0.065 | -6.670  | 4.016  | 1.00 | 24.04 |
| ATOM | 98  | 2HB | ASP | A | 20 | -2.668 | -7.286  | 3.113  | 1.00 | 34.31 |
| ATOM | 99  | 3HB | ASP | A | 20 | -2.186 | -8.605  | 4.177  | 1.00 | 54.20 |
| ATOM | 100 | N   | TYR | A | 21 | 0.085  | -9.632  | 2.634  | 1.00 | 31.33 |
| ATOM | 101 | CA  | TYR | A | 21 | 0.744  | -10.931 | 2.695  | 1.00 | 23.34 |
| ATOM | 102 | C   | TYR | A | 21 | 2.247  | -10.770 | 2.901  | 1.00 | 45.03 |
| ATOM | 103 | O   | TYR | A | 21 | 2.879  | -11.570 | 3.590  | 1.00 | 64.12 |
| ATOM | 104 | CB  | TYR | A | 21 | 0.475  | -11.724 | 1.415  | 1.00 | 3.11  |
| ATOM | 105 | CG  | TYR | A | 21 | 1.733  | -12.157 | 0.695  | 1.00 | 13.34 |
| ATOM | 106 | CD1 | TYR | A | 21 | 2.340  | -11.329 | -0.241 | 1.00 | 23.10 |
| ATOM | 107 | CD2 | TYR | A | 21 | 2.313  | -13.393 | 0.951  | 1.00 | 75.12 |
| ATOM | 108 | CE1 | TYR | A | 21 | 3.489  | -11.720 | -0.902 | 1.00 | 32.44 |
| ATOM | 109 | CE2 | TYR | A | 21 | 3.462  | -13.792 | 0.296  | 1.00 | 33.01 |

|      |     |      |     |   |    |        |         |        |      |       |
|------|-----|------|-----|---|----|--------|---------|--------|------|-------|
| ATOM | 110 | CZ   | TYR | A | 21 | 4.046  | -12.952 | -0.629 | 1.00 | 71.43 |
| ATOM | 111 | OH   | TYR | A | 21 | 5.190  | -13.347 | -1.285 | 1.00 | 12.24 |
| ATOM | 112 | H    | TYR | A | 21 | -0.449 | -9.404  | 1.845  | 1.00 | 63.33 |
| ATOM | 113 | HA   | TYR | A | 21 | 0.334  | -11.473 | 3.535  | 1.00 | 12.41 |
| ATOM | 114 | 2HB  | TYR | A | 21 | -0.087 | -12.611 | 1.661  | 1.00 | 74.24 |
| ATOM | 115 | 3HB  | TYR | A | 21 | -0.102 | -11.113 | 0.737  | 1.00 | 72.35 |
| ATOM | 116 | HD1  | TYR | A | 21 | 1.902  | -10.365 | -0.452 | 1.00 | 54.51 |
| ATOM | 117 | HD2  | TYR | A | 21 | 1.852  | -14.048 | 1.676  | 1.00 | 60.51 |
| ATOM | 118 | HE1  | TYR | A | 21 | 3.947  | -11.063 | -1.626 | 1.00 | 72.21 |
| ATOM | 119 | HE2  | TYR | A | 21 | 3.898  | -14.757 | 0.509  | 1.00 | 52.12 |
| ATOM | 120 | HH   | TYR | A | 21 | 5.938  | -12.844 | -0.953 | 1.00 | 73.20 |
| ATOM | 121 | N    | GLN | A | 22 | 2.812  | -9.729  | 2.297  | 1.00 | 1.15  |
| ATOM | 122 | CA   | GLN | A | 22 | 4.241  | -9.462  | 2.414  | 1.00 | 52.23 |
| ATOM | 123 | C    | GLN | A | 22 | 4.683  | -9.490  | 3.873  | 1.00 | 60.20 |
| ATOM | 124 | O    | GLN | A | 22 | 5.783  | -9.942  | 4.188  | 1.00 | 4.05  |
| ATOM | 125 | CB   | GLN | A | 22 | 4.580  | -8.106  | 1.792  | 1.00 | 51.01 |
| ATOM | 126 | CG   | GLN | A | 22 | 6.022  | -7.678  | 2.014  | 1.00 | 34.31 |
| ATOM | 127 | CD   | GLN | A | 22 | 7.013  | -8.574  | 1.298  | 1.00 | 21.34 |
| ATOM | 128 | NE2  | GLN | A | 22 | 6.949  | -8.587  | -0.028 | 1.00 | 25.41 |
| ATOM | 129 | OE1  | GLN | A | 22 | 7.828  | -9.248  | 1.930  | 1.00 | 15.35 |
| ATOM | 130 | H    | GLN | A | 22 | 2.255  | -9.127  | 1.762  | 1.00 | 63.01 |
| ATOM | 131 | HA   | GLN | A | 22 | 4.767  | -10.236 | 1.876  | 1.00 | 3.30  |
| ATOM | 132 | 2HB  | GLN | A | 22 | 4.402  | -8.156  | 0.728  | 1.00 | 35.42 |
| ATOM | 133 | 3HB  | GLN | A | 22 | 3.934  | -7.355  | 2.222  | 1.00 | 42.40 |
| ATOM | 134 | 2HG  | GLN | A | 22 | 6.145  | -6.669  | 1.650  | 1.00 | 14.00 |
| ATOM | 135 | 3HG  | GLN | A | 22 | 6.232  | -7.706  | 3.073  | 1.00 | 3.10  |
| ATOM | 136 | 1HE2 | GLN | A | 22 | 6.276  | -8.024  | -0.464 | 1.00 | 74.10 |
| ATOM | 137 | 2HE2 | GLN | A | 22 | 7.579  | -9.157  | -0.516 | 1.00 | 11.21 |
| ATOM | 138 | N    | GLN | A | 23 | 3.818  | -9.004  | 4.758  | 1.00 | 63.43 |
| ATOM | 139 | CA   | GLN | A | 23 | 4.121  | -8.973  | 6.184  | 1.00 | 63.53 |
| ATOM | 140 | C    | GLN | A | 23 | 3.945  | -10.354 | 6.808  | 1.00 | 42.04 |
| ATOM | 141 | O    | GLN | A | 23 | 4.701  | -10.745 | 7.698  | 1.00 | 60.50 |
| ATOM | 142 | CB   | GLN | A | 23 | 3.223  | -7.961  | 6.896  | 1.00 | 51.44 |
| ATOM | 143 | CG   | GLN | A | 23 | 3.960  | -6.714  | 7.360  | 1.00 | 74.55 |
| ATOM | 144 | CD   | GLN | A | 23 | 5.187  | -7.037  | 8.189  | 1.00 | 41.13 |
| ATOM | 145 | NE2  | GLN | A | 23 | 6.296  | -6.370  | 7.890  | 1.00 | 14.40 |
| ATOM | 146 | OE1  | GLN | A | 23 | 5.140  | -7.877  | 9.088  | 1.00 | 11.41 |
| ATOM | 147 | H    | GLN | A | 23 | 2.957  | -8.659  | 4.444  | 1.00 | 3.54  |
| ATOM | 148 | HA   | GLN | A | 23 | 5.151  | -8.670  | 6.297  | 1.00 | 12.31 |
| ATOM | 149 | 2HB  | GLN | A | 23 | 2.437  | -7.658  | 6.221  | 1.00 | 55.24 |
| ATOM | 150 | 3HB  | GLN | A | 23 | 2.782  | -8.434  | 7.760  | 1.00 | 33.13 |
| ATOM | 151 | 2HG  | GLN | A | 23 | 4.269  | -6.150  | 6.492  | 1.00 | 73.50 |
| ATOM | 152 | 3HG  | GLN | A | 23 | 3.287  | -6.116  | 7.956  | 1.00 | 40.32 |
| ATOM | 153 | 1HE2 | GLN | A | 23 | 6.259  | -5.714  | 7.161  | 1.00 | 33.35 |
| ATOM | 154 | 2HE2 | GLN | A | 23 | 7.103  | -6.557  | 8.410  | 1.00 | 24.54 |
| ATOM | 155 | N    | LEU | A | 24 | 2.943  | -11.088 | 6.336  | 1.00 | 43.54 |
| ATOM | 156 | CA   | LEU | A | 24 | 2.667  | -12.425 | 6.848  | 1.00 | 63.45 |
| ATOM | 157 | C    | LEU | A | 24 | 3.926  | -13.287 | 6.827  | 1.00 | 1.43  |
| ATOM | 158 | O    | LEU | A | 24 | 4.140  | -14.112 | 7.715  | 1.00 | 12.15 |
| ATOM | 159 | CB   | LEU | A | 24 | 1.566  | -13.092 | 6.021  | 1.00 | 42.00 |
| ATOM | 160 | CG   | LEU | A | 24 | 1.287  | -14.562 | 6.336  | 1.00 | 13.24 |
| ATOM | 161 | CD1  | LEU | A | 24 | 0.596  | -14.696 | 7.684  | 1.00 | 33.45 |
| ATOM | 162 | CD2  | LEU | A | 24 | 0.444  | -15.192 | 5.238  | 1.00 | 74.24 |
| ATOM | 163 | H    | LEU | A | 24 | 2.375  | -10.722 | 5.626  | 1.00 | 3.02  |
| ATOM | 164 | HA   | LEU | A | 24 | 2.330  | -12.326 | 7.868  | 1.00 | 32.35 |
| ATOM | 165 | 2HB  | LEU | A | 24 | 0.653  | -12.540 | 6.181  | 1.00 | 32.21 |
| ATOM | 166 | 3HB  | LEU | A | 24 | 1.848  | -13.024 | 4.980  | 1.00 | 42.32 |
| ATOM | 167 | HG   | LEU | A | 24 | 2.225  | -15.097 | 6.388  | 1.00 | 31.11 |
| ATOM | 168 | 1HD1 | LEU | A | 24 | -0.471 | -14.774 | 7.536  | 1.00 | 3.31  |

|      |     |      |     |   |    |        |         |        |      |       |
|------|-----|------|-----|---|----|--------|---------|--------|------|-------|
| ATOM | 169 | 2HD1 | LEU | A | 24 | 0.813  | -13.828 | 8.289  | 1.00 | 62.14 |
| ATOM | 170 | 3HD1 | LEU | A | 24 | 0.955  | -15.583 | 8.186  | 1.00 | 4.23  |
| ATOM | 171 | 1HD2 | LEU | A | 24 | -0.539 | -15.420 | 5.624  | 1.00 | 23.12 |
| ATOM | 172 | 2HD2 | LEU | A | 24 | 0.917  | -16.102 | 4.898  | 1.00 | 32.43 |
| ATOM | 173 | 3HD2 | LEU | A | 24 | 0.355  | -14.502 | 4.412  | 1.00 | 73.44 |
| ATOM | 174 | N    | ARG | A | 25 | 4.757  | -13.087 | 5.809  | 1.00 | 30.14 |
| ATOM | 175 | CA   | ARG | A | 25 | 5.995  | -13.845 | 5.674  | 1.00 | 2.32  |
| ATOM | 176 | C    | ARG | A | 25 | 6.903  | -13.623 | 6.881  | 1.00 | 74.22 |
| ATOM | 177 | O    | ARG | A | 25 | 7.453  | -14.572 | 7.437  | 1.00 | 24.42 |
| ATOM | 178 | CB   | ARG | A | 25 | 6.727  | -13.443 | 4.392  | 1.00 | 14.10 |
| ATOM | 179 | CG   | ARG | A | 25 | 7.034  | -14.614 | 3.474  | 1.00 | 61.33 |
| ATOM | 180 | CD   | ARG | A | 25 | 6.282  | -14.502 | 2.157  | 1.00 | 45.25 |
| ATOM | 181 | NE   | ARG | A | 25 | 6.902  | -15.300 | 1.103  | 1.00 | 65.44 |
| ATOM | 182 | CZ   | ARG | A | 25 | 7.987  | -14.922 | 0.436  | 1.00 | 64.20 |
| ATOM | 183 | NH1  | ARG | A | 25 | 8.569  | -13.764 | 0.713  | 1.00 | 45.41 |
| ATOM | 184 | NH2  | ARG | A | 25 | 8.493  | -15.704 | -0.510 | 1.00 | 13.03 |
| ATOM | 185 | H    | ARG | A | 25 | 4.532  | -12.415 | 5.133  | 1.00 | 73.04 |
| ATOM | 186 | HA   | ARG | A | 25 | 5.739  | -14.892 | 5.619  | 1.00 | 61.12 |
| ATOM | 187 | 2HB  | ARG | A | 25 | 6.115  | -12.739 | 3.848  | 1.00 | 54.52 |
| ATOM | 188 | 3HB  | ARG | A | 25 | 7.659  | -12.967 | 4.658  | 1.00 | 74.42 |
| ATOM | 189 | 2HG  | ARG | A | 25 | 8.095  | -14.631 | 3.270  | 1.00 | 74.13 |
| ATOM | 190 | 3HG  | ARG | A | 25 | 6.746  | -15.531 | 3.966  | 1.00 | 15.11 |
| ATOM | 191 | 2HD  | ARG | A | 25 | 5.269  | -14.844 | 2.305  | 1.00 | 22.22 |
| ATOM | 192 | 3HD  | ARG | A | 25 | 6.271  | -13.466 | 1.852  | 1.00 | 61.15 |
| ATOM | 193 | HE   | ARG | A | 25 | 6.489  | -16.160 | 0.882  | 1.00 | 74.33 |
| ATOM | 194 | 1HH1 | ARG | A | 25 | 8.192  | -13.173 | 1.426  | 1.00 | 55.03 |
| ATOM | 195 | 2HH1 | ARG | A | 25 | 9.387  | -13.482 | 0.210  | 1.00 | 1.33  |
| ATOM | 196 | 1HH2 | ARG | A | 25 | 8.057  | -16.578 | -0.721 | 1.00 | 72.21 |
| ATOM | 197 | 2HH2 | ARG | A | 25 | 9.309  | -15.418 | -1.011 | 1.00 | 31.52 |
| ATOM | 198 | N    | GLU | A | 26 | 7.053  | -12.364 | 7.278  | 1.00 | 10.45 |
| ATOM | 199 | CA   | GLU | A | 26 | 7.895  | -12.018 | 8.418  | 1.00 | 73.30 |
| ATOM | 200 | C    | GLU | A | 26 | 7.345  | -12.627 | 9.705  | 1.00 | 62.53 |
| ATOM | 201 | O    | GLU | A | 26 | 8.100  | -13.123 | 10.541 | 1.00 | 4.23  |
| ATOM | 202 | CB   | GLU | A | 26 | 7.997  | -10.498 | 8.563  | 1.00 | 35.52 |
| ATOM | 203 | CG   | GLU | A | 26 | 9.357  | -9.940  | 8.181  | 1.00 | 70.32 |
| ATOM | 204 | CD   | GLU | A | 26 | 9.256  | -8.689  | 7.331  | 1.00 | 40.33 |
| ATOM | 205 | OE1  | GLU | A | 26 | 9.678  | -7.614  | 7.806  | 1.00 | 13.44 |
| ATOM | 206 | OE2  | GLU | A | 26 | 8.756  | -8.784  | 6.191  | 1.00 | 55.23 |
| ATOM | 207 | H    | GLU | A | 26 | 6.588  | -11.650 | 6.794  | 1.00 | 34.20 |
| ATOM | 208 | HA   | GLU | A | 26 | 8.880  | -12.420 | 8.236  | 1.00 | 1.12  |
| ATOM | 209 | 2HB  | GLU | A | 26 | 7.251  | -10.038 | 7.932  | 1.00 | 14.25 |
| ATOM | 210 | 3HB  | GLU | A | 26 | 7.799  | -10.234 | 9.591  | 1.00 | 15.44 |
| ATOM | 211 | 2HG  | GLU | A | 26 | 9.900  | -9.701  | 9.083  | 1.00 | 64.24 |
| ATOM | 212 | 3HG  | GLU | A | 26 | 9.897  | -10.693 | 7.625  | 1.00 | 3.41  |
| ATOM | 213 | N    | ARG | A | 27 | 6.025  | -12.586 | 9.855  | 1.00 | 24.14 |
| ATOM | 214 | CA   | ARG | A | 27 | 5.374  | -13.132 | 11.040 | 1.00 | 2.11  |
| ATOM | 215 | C    | ARG | A | 27 | 5.507  | -14.651 | 11.082 | 1.00 | 21.42 |
| ATOM | 216 | O    | ARG | A | 27 | 5.597  | -15.248 | 12.156 | 1.00 | 22.10 |
| ATOM | 217 | CB   | ARG | A | 27 | 3.896  | -12.738 | 11.063 | 1.00 | 3.31  |
| ATOM | 218 | CG   | ARG | A | 27 | 3.383  | -12.379 | 12.448 | 1.00 | 1.11  |
| ATOM | 219 | CD   | ARG | A | 27 | 2.731  | -11.005 | 12.462 | 1.00 | 75.42 |
| ATOM | 220 | NE   | ARG | A | 27 | 2.206  | -10.662 | 13.781 | 1.00 | 44.31 |
| ATOM | 221 | CZ   | ARG | A | 27 | 1.878  | -9.426  | 14.142 | 1.00 | 23.22 |
| ATOM | 222 | NH1  | ARG | A | 27 | 2.019  | -8.422  | 13.287 | 1.00 | 22.55 |
| ATOM | 223 | NH2  | ARG | A | 27 | 1.408  | -9.193  | 15.361 | 1.00 | 53.13 |
| ATOM | 224 | H    | ARG | A | 27 | 5.476  | -12.178 | 9.154  | 1.00 | 63.15 |
| ATOM | 225 | HA   | ARG | A | 27 | 5.862  | -12.716 | 11.909 | 1.00 | 42.54 |
| ATOM | 226 | 2HB  | ARG | A | 27 | 3.753  | -11.883 | 10.418 | 1.00 | 24.10 |
| ATOM | 227 | 3HB  | ARG | A | 27 | 3.310  | -13.563 | 10.689 | 1.00 | 63.35 |

|      |     |      |     |   |    |        |         |        |      |       |
|------|-----|------|-----|---|----|--------|---------|--------|------|-------|
| ATOM | 228 | 2HG  | ARG | A | 27 | 2.654  | -13.115 | 12.753 | 1.00 | 12.45 |
| ATOM | 229 | 3HG  | ARG | A | 27 | 4.212  | -12.381 | 13.140 | 1.00 | 33.44 |
| ATOM | 230 | 2HD  | ARG | A | 27 | 3.466  | -10.269 | 12.174 | 1.00 | 22.14 |
| ATOM | 231 | 3HD  | ARG | A | 27 | 1.919  | -11.000 | 11.749 | 1.00 | 21.35 |
| ATOM | 232 | HE   | ARG | A | 27 | 2.094  | -11.388 | 14.428 | 1.00 | 23.32 |
| ATOM | 233 | 1HH1 | ARG | A | 27 | 2.373  | -8.596  | 12.368 | 1.00 | 14.54 |
| ATOM | 234 | 2HH1 | ARG | A | 27 | 1.770  | -7.493  | 13.562 | 1.00 | 62.33 |
| ATOM | 235 | 1HH2 | ARG | A | 27 | 1.300  | -9.947  | 16.008 | 1.00 | 71.12 |
| ATOM | 236 | 2HH2 | ARG | A | 27 | 1.161  | -8.263  | 15.632 | 1.00 | 43.03 |
| ATOM | 237 | N    | LEU | A | 28 | 5.518  | -15.272 | 9.908  | 1.00 | 40.34 |
| ATOM | 238 | CA   | LEU | A | 28 | 5.639  | -16.722 | 9.809  | 1.00 | 24.24 |
| ATOM | 239 | C    | LEU | A | 28 | 7.072  | -17.168 | 10.081 | 1.00 | 25.41 |
| ATOM | 240 | O    | LEU | A | 28 | 7.313  | -18.047 | 10.910 | 1.00 | 12.41 |
| ATOM | 241 | CB   | LEU | A | 28 | 5.199  | -17.198 | 8.424  | 1.00 | 41.01 |
| ATOM | 242 | CG   | LEU | A | 28 | 3.690  | -17.310 | 8.201  | 1.00 | 45.33 |
| ATOM | 243 | CD1  | LEU | A | 28 | 3.376  | -17.408 | 6.716  | 1.00 | 64.21 |
| ATOM | 244 | CD2  | LEU | A | 28 | 3.128  | -18.511 | 8.947  | 1.00 | 4.44  |
| ATOM | 245 | H    | LEU | A | 28 | 5.443  | -14.743 | 9.086  | 1.00 | 11.04 |
| ATOM | 246 | HA   | LEU | A | 28 | 4.992  | -17.160 | 10.554 | 1.00 | 15.12 |
| ATOM | 247 | 2HB  | LEU | A | 28 | 5.590  | -16.504 | 7.696  | 1.00 | 2.32  |
| ATOM | 248 | 3HB  | LEU | A | 28 | 5.633  | -18.174 | 8.257  | 1.00 | 15.11 |
| ATOM | 249 | HG   | LEU | A | 28 | 3.209  | -16.421 | 8.585  | 1.00 | 43.33 |
| ATOM | 250 | 1HD1 | LEU | A | 28 | 3.652  | -16.486 | 6.228  | 1.00 | 54.41 |
| ATOM | 251 | 2HD1 | LEU | A | 28 | 2.319  | -17.585 | 6.583  | 1.00 | 44.14 |
| ATOM | 252 | 3HD1 | LEU | A | 28 | 3.935  | -18.226 | 6.283  | 1.00 | 11.45 |
| ATOM | 253 | 1HD2 | LEU | A | 28 | 3.074  | -18.285 | 10.002 | 1.00 | 3.22  |
| ATOM | 254 | 2HD2 | LEU | A | 28 | 3.774  | -19.364 | 8.795  | 1.00 | 53.44 |
| ATOM | 255 | 3HD2 | LEU | A | 28 | 2.140  | -18.735 | 8.576  | 1.00 | 52.03 |
| ATOM | 256 | N    | ILE | A | 29 | 8.020  | -16.556 | 9.379  | 1.00 | 23.33 |
| ATOM | 257 | CA   | ILE | A | 29 | 9.430  | -16.888 | 9.548  | 1.00 | 75.43 |
| ATOM | 258 | C    | ILE | A | 29 | 9.856  | -16.754 | 11.006 | 1.00 | 53.34 |
| ATOM | 259 | O    | ILE | A | 29 | 10.684 | -17.522 | 11.493 | 1.00 | 21.22 |
| ATOM | 260 | CB   | ILE | A | 29 | 10.328 | -15.990 | 8.677  | 1.00 | 54.11 |
| ATOM | 261 | CG1  | ILE | A | 29 | 10.332 | -16.486 | 7.229  | 1.00 | 1.35  |
| ATOM | 262 | CG2  | ILE | A | 29 | 11.742 | -15.955 | 9.235  | 1.00 | 24.12 |
| ATOM | 263 | CD1  | ILE | A | 29 | 11.039 | -15.551 | 6.273  | 1.00 | 54.02 |
| ATOM | 264 | H    | ILE | A | 29 | 7.766  | -15.865 | 8.734  | 1.00 | 51.32 |
| ATOM | 265 | HA   | ILE | A | 29 | 9.570  | -17.913 | 9.236  | 1.00 | 74.51 |
| ATOM | 266 | HB   | ILE | A | 29 | 9.931  | -14.987 | 8.705  | 1.00 | 15.31 |
| ATOM | 267 | 2HG1 | ILE | A | 29 | 10.828 | -17.442 | 7.185  | 1.00 | 64.23 |
| ATOM | 268 | 3HG1 | ILE | A | 29 | 9.312  | -16.598 | 6.892  | 1.00 | 33.03 |
| ATOM | 269 | 1HG2 | ILE | A | 29 | 11.970 | -16.904 | 9.698  | 1.00 | 62.23 |
| ATOM | 270 | 2HG2 | ILE | A | 29 | 12.441 | -15.770 | 8.433  | 1.00 | 11.10 |
| ATOM | 271 | 3HG2 | ILE | A | 29 | 11.821 | -15.168 | 9.970  | 1.00 | 34.42 |
| ATOM | 272 | 1HD1 | ILE | A | 29 | 10.918 | -14.532 | 6.610  | 1.00 | 40.15 |
| ATOM | 273 | 2HD1 | ILE | A | 29 | 12.089 | -15.798 | 6.237  | 1.00 | 12.41 |
| ATOM | 274 | 3HD1 | ILE | A | 29 | 10.611 | -15.656 | 5.286  | 1.00 | 52.32 |
| ATOM | 275 | N    | GLN | A | 30 | 9.282  | -15.773 | 11.696 | 1.00 | 62.41 |
| ATOM | 276 | CA   | GLN | A | 30 | 9.602  | -15.539 | 13.099 | 1.00 | 23.20 |
| ATOM | 277 | C    | GLN | A | 30 | 8.907  | -16.560 | 13.994 | 1.00 | 53.32 |
| ATOM | 278 | O    | GLN | A | 30 | 9.558  | -17.290 | 14.740 | 1.00 | 72.44 |
| ATOM | 279 | CB   | GLN | A | 30 | 9.194  | -14.123 | 13.508 | 1.00 | 51.24 |
| ATOM | 280 | CG   | GLN | A | 30 | 10.374 | -13.203 | 13.777 | 1.00 | 20.32 |
| ATOM | 281 | CD   | GLN | A | 30 | 10.467 | -12.783 | 15.231 | 1.00 | 74.50 |
| ATOM | 282 | NE2  | GLN | A | 30 | 9.680  | -11.783 | 15.610 | 1.00 | 40.12 |
| ATOM | 283 | OE1  | GLN | A | 30 | 11.237 | -13.352 | 16.005 | 1.00 | 32.05 |
| ATOM | 284 | H    | GLN | A | 30 | 8.629  | -15.194 | 11.251 | 1.00 | 25.24 |
| ATOM | 285 | HA   | GLN | A | 30 | 10.670 | -15.644 | 13.217 | 1.00 | 21.22 |
| ATOM | 286 | 2HB  | GLN | A | 30 | 8.601  | -13.690 | 12.716 | 1.00 | 13.43 |

|      |     |      |     |   |    |        |         |        |      |       |
|------|-----|------|-----|---|----|--------|---------|--------|------|-------|
| ATOM | 287 | 3HB  | GLN | A | 30 | 8.596  | -14.178 | 14.406 | 1.00 | 65.24 |
| ATOM | 288 | 2HG  | GLN | A | 30 | 11.284 | -13.719 | 13.509 | 1.00 | 4.32  |
| ATOM | 289 | 3HG  | GLN | A | 30 | 10.270 | -12.318 | 13.168 | 1.00 | 42.24 |
| ATOM | 290 | 1HE2 | GLN | A | 30 | 9.091  | -11.378 | 14.938 | 1.00 | 31.34 |
| ATOM | 291 | 2HE2 | GLN | A | 30 | 9.719  | -11.492 | 16.544 | 1.00 | 52.33 |
| ATOM | 292 | N    | GLU | A | 31 | 7.580  | -16.603 | 13.914 | 1.00 | 64.14 |
| ATOM | 293 | CA   | GLU | A | 31 | 6.797  | -17.534 | 14.718 | 1.00 | 43.12 |
| ATOM | 294 | C    | GLU | A | 31 | 7.329  | -18.957 | 14.575 | 1.00 | 23.03 |
| ATOM | 295 | O    | GLU | A | 31 | 7.599  | -19.633 | 15.569 | 1.00 | 64.54 |
| ATOM | 296 | CB   | GLU | A | 31 | 5.325  | -17.485 | 14.306 | 1.00 | 54.54 |
| ATOM | 297 | CG   | GLU | A | 31 | 4.371  | -17.933 | 15.400 | 1.00 | 32.40 |
| ATOM | 298 | CD   | GLU | A | 31 | 4.159  | -16.871 | 16.461 | 1.00 | 23.13 |
| ATOM | 299 | OE1  | GLU | A | 31 | 3.829  | -15.724 | 16.094 | 1.00 | 74.11 |
| ATOM | 300 | OE2  | GLU | A | 31 | 4.324  | -17.186 | 17.658 | 1.00 | 23.11 |
| ATOM | 301 | H    | GLU | A | 31 | 7.118  | -15.995 | 13.300 | 1.00 | 1.10  |
| ATOM | 302 | HA   | GLU | A | 31 | 6.882  | -17.233 | 15.751 | 1.00 | 45.52 |
| ATOM | 303 | 2HB  | GLU | A | 31 | 5.074  | -16.471 | 14.031 | 1.00 | 13.50 |
| ATOM | 304 | 3HB  | GLU | A | 31 | 5.182  | -18.126 | 13.448 | 1.00 | 0.52  |
| ATOM | 305 | 2HG  | GLU | A | 31 | 3.416  | -18.169 | 14.954 | 1.00 | 64.32 |
| ATOM | 306 | 3HG  | GLU | A | 31 | 4.775  | -18.817 | 15.872 | 1.00 | 73.23 |
| ATOM | 307 | N    | LEU | A | 32 | 7.477  | -19.405 | 13.334 | 1.00 | 73.45 |
| ATOM | 308 | CA   | LEU | A | 32 | 7.976  | -20.748 | 13.059 | 1.00 | 32.53 |
| ATOM | 309 | C    | LEU | A | 32 | 9.476  | -20.836 | 13.322 | 1.00 | 72.12 |
| ATOM | 310 | O    | LEU | A | 32 | 10.024 | -21.925 | 13.488 | 1.00 | 1.35  |
| ATOM | 311 | CB   | LEU | A | 32 | 7.676  | -21.139 | 11.611 | 1.00 | 23.30 |
| ATOM | 312 | CG   | LEU | A | 32 | 6.262  | -21.650 | 11.332 | 1.00 | 23.34 |
| ATOM | 313 | CD1  | LEU | A | 32 | 5.244  | -20.539 | 11.533 | 1.00 | 11.12 |
| ATOM | 314 | CD2  | LEU | A | 32 | 6.167  | -22.215 | 9.922  | 1.00 | 4.24  |
| ATOM | 315 | H    | LEU | A | 32 | 7.245  | -18.820 | 12.583 | 1.00 | 71.42 |
| ATOM | 316 | HA   | LEU | A | 32 | 7.466  | -21.433 | 13.721 | 1.00 | 1.21  |
| ATOM | 317 | 2HB  | LEU | A | 32 | 7.841  | -20.270 | 10.993 | 1.00 | 22.02 |
| ATOM | 318 | 3HB  | LEU | A | 32 | 8.372  | -21.917 | 11.329 | 1.00 | 51.24 |
| ATOM | 319 | HG   | LEU | A | 32 | 6.030  | -22.445 | 12.028 | 1.00 | 11.11 |
| ATOM | 320 | 1HD1 | LEU | A | 32 | 4.560  | -20.522 | 10.698 | 1.00 | 21.22 |
| ATOM | 321 | 2HD1 | LEU | A | 32 | 5.755  | -19.590 | 11.599 | 1.00 | 1.11  |
| ATOM | 322 | 3HD1 | LEU | A | 32 | 4.694  | -20.715 | 12.446 | 1.00 | 21.33 |
| ATOM | 323 | 1HD2 | LEU | A | 32 | 7.156  | -22.278 | 9.493  | 1.00 | 5.02  |
| ATOM | 324 | 2HD2 | LEU | A | 32 | 5.553  | -21.566 | 9.316  | 1.00 | 54.24 |
| ATOM | 325 | 3HD2 | LEU | A | 32 | 5.726  | -23.200 | 9.958  | 1.00 | 4.20  |
| ATOM | 326 | N    | ASN | A | 33 | 10.133 | -19.682 | 13.359 | 1.00 | 2.42  |
| ATOM | 327 | CA   | ASN | A | 33 | 11.570 | -19.628 | 13.603 | 1.00 | 0.24  |
| ATOM | 328 | C    | ASN | A | 33 | 12.339 | -20.310 | 12.476 | 1.00 | 23.34 |
| ATOM | 329 | O    | ASN | A | 33 | 13.376 | -20.934 | 12.707 | 1.00 | 60.43 |
| ATOM | 330 | CB   | ASN | A | 33 | 11.906 | -20.291 | 14.940 | 1.00 | 23.44 |
| ATOM | 331 | CG   | ASN | A | 33 | 13.236 | -19.824 | 15.499 | 1.00 | 25.33 |
| ATOM | 332 | ND2  | ASN | A | 33 | 13.459 | -20.076 | 16.784 | 1.00 | 2.41  |
| ATOM | 333 | OD1  | ASN | A | 33 | 14.054 | -19.245 | 14.784 | 1.00 | 12.31 |
| ATOM | 334 | H    | ASN | A | 33 | 9.641  | -18.846 | 13.219 | 1.00 | 51.11 |
| ATOM | 335 | HA   | ASN | A | 33 | 11.860 | -18.589 | 13.644 | 1.00 | 5.13  |
| ATOM | 336 | 2HB  | ASN | A | 33 | 11.134 | -20.054 | 15.657 | 1.00 | 34.53 |
| ATOM | 337 | 3HB  | ASN | A | 33 | 11.949 | -21.361 | 14.804 | 1.00 | 24.50 |
| ATOM | 338 | 1HD2 | ASN | A | 33 | 12.763 | -20.542 | 17.293 | 1.00 | 52.25 |
| ATOM | 339 | 2HD2 | ASN | A | 33 | 14.311 | -19.784 | 17.171 | 1.00 | 12.05 |
| ATOM | 340 | N    | LEU | A | 34 | 11.825 | -20.187 | 11.258 | 1.00 | 45.13 |
| ATOM | 341 | CA   | LEU | A | 34 | 12.464 | -20.791 | 10.093 | 1.00 | 10.04 |
| ATOM | 342 | C    | LEU | A | 34 | 13.265 | -19.754 | 9.312  | 1.00 | 21.24 |
| ATOM | 343 | O    | LEU | A | 34 | 13.431 | -18.618 | 9.757  | 1.00 | 52.54 |
| ATOM | 344 | CB   | LEU | A | 34 | 11.412 | -21.430 | 9.185  | 1.00 | 44.03 |
| ATOM | 345 | CG   | LEU | A | 34 | 11.473 | -22.952 | 9.055  | 1.00 | 32.44 |

|      |     |      |     |   |    |        |         |        |      |       |
|------|-----|------|-----|---|----|--------|---------|--------|------|-------|
| ATOM | 346 | CD1  | LEU | A | 34 | 10.381 | -23.453 | 8.122  | 1.00 | 2.42  |
| ATOM | 347 | CD2  | LEU | A | 34 | 12.843 | -23.392 | 8.560  | 1.00 | 0.32  |
| ATOM | 348 | H    | LEU | A | 34 | 10.997 | -19.678 | 11.137 | 1.00 | 44.33 |
| ATOM | 349 | HA   | LEU | A | 34 | 13.138 | -21.558 | 10.446 | 1.00 | 55.03 |
| ATOM | 350 | 2HB  | LEU | A | 34 | 10.439 | -21.170 | 9.571  | 1.00 | 2.43  |
| ATOM | 351 | 3HB  | LEU | A | 34 | 11.530 | -21.008 | 8.197  | 1.00 | 60.04 |
| ATOM | 352 | HG   | LEU | A | 34 | 11.309 | -23.397 | 10.028 | 1.00 | 43.33 |
| ATOM | 353 | 1HD1 | LEU | A | 34 | 10.450 | -22.935 | 7.178  | 1.00 | 42.15 |
| ATOM | 354 | 2HD1 | LEU | A | 34 | 9.415  | -23.265 | 8.566  | 1.00 | 74.11 |
| ATOM | 355 | 3HD1 | LEU | A | 34 | 10.503 | -24.514 | 7.962  | 1.00 | 43.12 |
| ATOM | 356 | 1HD2 | LEU | A | 34 | 12.854 | -24.465 | 8.438  | 1.00 | 1.34  |
| ATOM | 357 | 2HD2 | LEU | A | 34 | 13.595 | -23.103 | 9.280  | 1.00 | 23.53 |
| ATOM | 358 | 3HD2 | LEU | A | 34 | 13.052 | -22.919 | 7.612  | 1.00 | 35.10 |
| ATOM | 359 | N    | THR | A | 35 | 13.759 | -20.153 | 8.144  | 1.00 | 3.43  |
| ATOM | 360 | CA   | THR | A | 35 | 14.542 | -19.258 | 7.301  | 1.00 | 71.45 |
| ATOM | 361 | C    | THR | A | 35 | 13.724 | -18.770 | 6.110  | 1.00 | 3.13  |
| ATOM | 362 | O    | THR | A | 35 | 12.724 | -19.374 | 5.724  | 1.00 | 73.23 |
| ATOM | 363 | CB   | THR | A | 35 | 15.819 | -19.948 | 6.784  | 1.00 | 75.05 |
| ATOM | 364 | CG2  | THR | A | 35 | 16.968 | -19.764 | 7.763  | 1.00 | 35.24 |
| ATOM | 365 | OG1  | THR | A | 35 | 15.574 | -21.345 | 6.584  | 1.00 | 42.34 |
| ATOM | 366 | H    | THR | A | 35 | 13.593 | -21.071 | 7.845  | 1.00 | 42.35 |
| ATOM | 367 | HA   | THR | A | 35 | 14.834 | -18.407 | 7.898  | 1.00 | 64.11 |
| ATOM | 368 | HB   | THR | A | 35 | 16.095 | -19.500 | 5.840  | 1.00 | 55.23 |
| ATOM | 369 | HG1  | THR | A | 35 | 16.199 | -21.690 | 5.941  | 1.00 | 74.20 |
| ATOM | 370 | 1HG2 | THR | A | 35 | 17.085 | -20.661 | 8.353  | 1.00 | 31.22 |
| ATOM | 371 | 2HG2 | THR | A | 35 | 16.755 | -18.930 | 8.415  | 1.00 | 12.20 |
| ATOM | 372 | 3HG2 | THR | A | 35 | 17.878 | -19.571 | 7.217  | 1.00 | 25.41 |
| ATOM | 373 | N    | PRO | A | 36 | 14.158 | -17.650 | 5.513  | 1.00 | 1.01  |
| ATOM | 374 | CA   | PRO | A | 36 | 13.481 | -17.056 | 4.357  | 1.00 | 72.25 |
| ATOM | 375 | C    | PRO | A | 36 | 13.633 | -17.903 | 3.098  | 1.00 | 61.32 |
| ATOM | 376 | O    | PRO | A | 36 | 12.771 | -17.887 | 2.220  | 1.00 | 14.52 |
| ATOM | 377 | CB   | PRO | A | 36 | 14.188 | -15.710 | 4.184  | 1.00 | 42.21 |
| ATOM | 378 | CG   | PRO | A | 36 | 15.536 | -15.910 | 4.785  | 1.00 | 24.33 |
| ATOM | 379 | CD   | PRO | A | 36 | 15.344 | -16.877 | 5.921  | 1.00 | 74.34 |
| ATOM | 380 | HA   | PRO | A | 36 | 12.432 | -16.891 | 4.553  | 1.00 | 14.10 |
| ATOM | 381 | 2HB  | PRO | A | 36 | 14.256 | -15.468 | 3.132  | 1.00 | 33.14 |
| ATOM | 382 | 3HB  | PRO | A | 36 | 13.636 | -14.940 | 4.701  | 1.00 | 11.12 |
| ATOM | 383 | 2HG  | PRO | A | 36 | 16.209 | -16.325 | 4.050  | 1.00 | 53.22 |
| ATOM | 384 | 3HG  | PRO | A | 36 | 15.916 | -14.970 | 5.155  | 1.00 | 4.54  |
| ATOM | 385 | 2HD  | PRO | A | 36 | 16.206 | -17.519 | 6.021  | 1.00 | 45.15 |
| ATOM | 386 | 3HD  | PRO | A | 36 | 15.158 | -16.345 | 6.842  | 1.00 | 20.31 |
| ATOM | 387 | N    | GLN | A | 37 | 14.735 | -18.643 | 3.017  | 1.00 | 13.42 |
| ATOM | 388 | CA   | GLN | A | 37 | 14.999 | -19.496 | 1.865  | 1.00 | 53.02 |
| ATOM | 389 | C    | GLN | A | 37 | 14.262 | -20.825 | 1.992  | 1.00 | 72.25 |
| ATOM | 390 | O    | GLN | A | 37 | 13.857 | -21.418 | 0.992  | 1.00 | 14.10 |
| ATOM | 391 | CB   | GLN | A | 37 | 16.501 | -19.744 | 1.721  | 1.00 | 63.11 |
| ATOM | 392 | CG   | GLN | A | 37 | 17.161 | -18.880 | 0.658  | 1.00 | 25.34 |
| ATOM | 393 | CD   | GLN | A | 37 | 18.675 | -18.956 | 0.703  | 1.00 | 51.35 |
| ATOM | 394 | NE2  | GLN | A | 37 | 19.333 | -17.866 | 0.325  | 1.00 | 65.34 |
| ATOM | 395 | OE1  | GLN | A | 37 | 19.246 | -19.982 | 1.072  | 1.00 | 4.11  |
| ATOM | 396 | H    | GLN | A | 37 | 15.385 | -18.613 | 3.749  | 1.00 | 33.12 |
| ATOM | 397 | HA   | GLN | A | 37 | 14.642 | -18.983 | 0.984  | 1.00 | 30.54 |
| ATOM | 398 | 2HB  | GLN | A | 37 | 16.980 | -19.542 | 2.667  | 1.00 | 12.24 |
| ATOM | 399 | 3HB  | GLN | A | 37 | 16.660 | -20.780 | 1.461  | 1.00 | 74.33 |
| ATOM | 400 | 2HG  | GLN | A | 37 | 16.829 | -19.211 | -0.314 | 1.00 | 74.13 |
| ATOM | 401 | 3HG  | GLN | A | 37 | 16.862 | -17.854 | 0.810  | 1.00 | 11.13 |
| ATOM | 402 | 1HE2 | GLN | A | 37 | 18.812 | -17.085 | 0.044  | 1.00 | 51.15 |
| ATOM | 403 | 2HE2 | GLN | A | 37 | 20.312 | -17.887 | 0.344  | 1.00 | 1.11  |
| ATOM | 404 | N    | GLN | A | 38 | 14.093 | -21.287 | 3.226  | 1.00 | 34.03 |

|      |     |      |     |   |    |        |         |        |      |       |
|------|-----|------|-----|---|----|--------|---------|--------|------|-------|
| ATOM | 405 | CA   | GLN | A | 38 | 13.405 | -22.547 | 3.482  | 1.00 | 21.25 |
| ATOM | 406 | C    | GLN | A | 38 | 11.898 | -22.389 | 3.313  | 1.00 | 73.21 |
| ATOM | 407 | O    | GLN | A | 38 | 11.281 | -23.063 | 2.486  | 1.00 | 3.12  |
| ATOM | 408 | CB   | GLN | A | 38 | 13.722 | -23.048 | 4.893  | 1.00 | 40.32 |
| ATOM | 409 | CG   | GLN | A | 38 | 12.815 | -24.177 | 5.356  | 1.00 | 45.24 |
| ATOM | 410 | CD   | GLN | A | 38 | 12.724 | -25.303 | 4.345  | 1.00 | 30.21 |
| ATOM | 411 | NE2  | GLN | A | 38 | 13.874 | -25.782 | 3.886  | 1.00 | 23.34 |
| ATOM | 412 | OE1  | GLN | A | 38 | 11.631 | -25.738 | 3.980  | 1.00 | 23.34 |
| ATOM | 413 | H    | GLN | A | 38 | 14.438 | -20.769 | 3.982  | 1.00 | 43.20 |
| ATOM | 414 | HA   | GLN | A | 38 | 13.762 | -23.271 | 2.765  | 1.00 | 15.22 |
| ATOM | 415 | 2HB  | GLN | A | 38 | 14.742 | -23.401 | 4.916  | 1.00 | 60.01 |
| ATOM | 416 | 3HB  | GLN | A | 38 | 13.618 | -22.225 | 5.585  | 1.00 | 24.54 |
| ATOM | 417 | 2HG  | GLN | A | 38 | 13.202 | -24.576 | 6.282  | 1.00 | 44.34 |
| ATOM | 418 | 3HG  | GLN | A | 38 | 11.825 | -23.780 | 5.522  | 1.00 | 72.31 |
| ATOM | 419 | 1HE2 | GLN | A | 38 | 14.707 | -25.388 | 4.223  | 1.00 | 54.42 |
| ATOM | 420 | 2HE2 | GLN | A | 38 | 13.845 | -26.511 | 3.233  | 1.00 | 13.11 |
| ATOM | 421 | N    | LEU | A | 39 | 11.309 | -21.496 | 4.101  | 1.00 | 43.14 |
| ATOM | 422 | CA   | LEU | A | 39 | 9.873  | -21.249 | 4.038  | 1.00 | 32.21 |
| ATOM | 423 | C    | LEU | A | 39 | 9.525  | -20.355 | 2.852  | 1.00 | 31.31 |
| ATOM | 424 | O    | LEU | A | 39 | 9.146  | -19.196 | 3.025  | 1.00 | 61.31 |
| ATOM | 425 | CB   | LEU | A | 39 | 9.389  | -20.603 | 5.338  | 1.00 | 64.04 |
| ATOM | 426 | CG   | LEU | A | 39 | 7.917  | -20.819 | 5.687  | 1.00 | 15.20 |
| ATOM | 427 | CD1  | LEU | A | 39 | 7.731  | -20.897 | 7.194  | 1.00 | 4.25  |
| ATOM | 428 | CD2  | LEU | A | 39 | 7.060  | -19.706 | 5.100  | 1.00 | 65.24 |
| ATOM | 429 | H    | LEU | A | 39 | 11.853 | -20.990 | 4.739  | 1.00 | 14.44 |
| ATOM | 430 | HA   | LEU | A | 39 | 9.378  | -22.201 | 3.913  | 1.00 | 25.12 |
| ATOM | 431 | 2HB  | LEU | A | 39 | 9.983  | -21.002 | 6.146  | 1.00 | 74.22 |
| ATOM | 432 | 3HB  | LEU | A | 39 | 9.560  | -19.539 | 5.260  | 1.00 | 53.42 |
| ATOM | 433 | HG   | LEU | A | 39 | 7.586  | -21.756 | 5.262  | 1.00 | 72.52 |
| ATOM | 434 | 1HD1 | LEU | A | 39 | 8.028  | -21.874 | 7.543  | 1.00 | 33.34 |
| ATOM | 435 | 2HD1 | LEU | A | 39 | 6.693  | -20.727 | 7.439  | 1.00 | 43.51 |
| ATOM | 436 | 3HD1 | LEU | A | 39 | 8.341  | -20.143 | 7.671  | 1.00 | 23.43 |
| ATOM | 437 | 1HD2 | LEU | A | 39 | 6.235  | -19.499 | 5.764  | 1.00 | 10.23 |
| ATOM | 438 | 2HD2 | LEU | A | 39 | 6.679  | -20.016 | 4.137  | 1.00 | 14.14 |
| ATOM | 439 | 3HD2 | LEU | A | 39 | 7.660  | -18.816 | 4.980  | 1.00 | 13.13 |
| ATOM | 440 | N    | HIS | A | 40 | 9.654  | -20.902 | 1.647  | 1.00 | 30.24 |
| ATOM | 441 | CA   | HIS | A | 40 | 9.350  | -20.155 | 0.432  | 1.00 | 4.01  |
| ATOM | 442 | C    | HIS | A | 40 | 7.843  | -20.022 | 0.238  | 1.00 | 32.42 |
| ATOM | 443 | O    | HIS | A | 40 | 7.063  | -20.749 | 0.853  | 1.00 | 71.24 |
| ATOM | 444 | CB   | HIS | A | 40 | 9.974  | -20.842 | -0.783 | 1.00 | 42.42 |
| ATOM | 445 | CG   | HIS | A | 40 | 10.010 | -19.978 | -2.006 | 1.00 | 50.13 |
| ATOM | 446 | CD2  | HIS | A | 40 | 10.472 | -18.719 | -2.188 | 1.00 | 5.22  |
| ATOM | 447 | ND1  | HIS | A | 40 | 9.528  | -20.388 | -3.231 | 1.00 | 41.15 |
| ATOM | 448 | CE1  | HIS | A | 40 | 9.694  | -19.419 | -4.114 | 1.00 | 62.11 |
| ATOM | 449 | NE2  | HIS | A | 40 | 10.265 | -18.395 | -3.506 | 1.00 | 11.20 |
| ATOM | 450 | H    | HIS | A | 40 | 9.960  | -21.830 | 1.574  | 1.00 | 1.03  |
| ATOM | 451 | HA   | HIS | A | 40 | 9.776  | -19.168 | 0.535  | 1.00 | 75.13 |
| ATOM | 452 | 2HB  | HIS | A | 40 | 10.990 | -21.124 | -0.547 | 1.00 | 53.41 |
| ATOM | 453 | 3HB  | HIS | A | 40 | 9.405  | -21.729 | -1.019 | 1.00 | 73.02 |
| ATOM | 454 | HD1  | HIS | A | 40 | 9.126  | -21.260 | -3.426 | 1.00 | 11.25 |
| ATOM | 455 | HD2  | HIS | A | 40 | 10.922 | -18.086 | -1.436 | 1.00 | 2.43  |
| ATOM | 456 | HE1  | HIS | A | 40 | 9.411  | -19.457 | -5.155 | 1.00 | 44.14 |
| ATOM | 457 | N    | GLU | A | 41 | 7.441  | -19.089 | -0.619 | 1.00 | 70.21 |
| ATOM | 458 | CA   | GLU | A | 41 | 6.027  | -18.861 | -0.892 | 1.00 | 33.43 |
| ATOM | 459 | C    | GLU | A | 41 | 5.338  | -20.156 | -1.314 | 1.00 | 24.34 |
| ATOM | 460 | O    | GLU | A | 41 | 4.177  | -20.390 | -0.981 | 1.00 | 60.12 |
| ATOM | 461 | CB   | GLU | A | 41 | 5.859  | -17.803 | -1.984 | 1.00 | 1.45  |
| ATOM | 462 | CG   | GLU | A | 41 | 6.376  | -18.243 | -3.343 | 1.00 | 4.23  |
| ATOM | 463 | CD   | GLU | A | 41 | 6.262  | -17.153 | -4.391 | 1.00 | 65.11 |

|      |     |      |     |   |    |       |         |        |      |       |
|------|-----|------|-----|---|----|-------|---------|--------|------|-------|
| ATOM | 464 | OE1  | GLU | A | 41 | 5.159 | -16.586 | -4.539 | 1.00 | 65.33 |
| ATOM | 465 | OE2  | GLU | A | 41 | 7.275 | -16.867 | -5.063 | 1.00 | 63.31 |
| ATOM | 466 | H    | GLU | A | 41 | 8.111 | -18.541 | -1.078 | 1.00 | 70.24 |
| ATOM | 467 | HA   | GLU | A | 41 | 5.567 | -18.503 | 0.017  | 1.00 | 23.52 |
| ATOM | 468 | 2HB  | GLU | A | 41 | 4.810 | -17.565 | -2.080 | 1.00 | 11.02 |
| ATOM | 469 | 3HB  | GLU | A | 41 | 6.395 | -16.912 | -1.689 | 1.00 | 73.13 |
| ATOM | 470 | 2HG  | GLU | A | 41 | 7.415 | -18.520 | -3.246 | 1.00 | 23.22 |
| ATOM | 471 | 3HG  | GLU | A | 41 | 5.805 | -19.099 | -3.671 | 1.00 | 5.10  |
| ATOM | 472 | N    | GLU | A | 42 | 6.064 | -20.993 | -2.048 | 1.00 | 64.33 |
| ATOM | 473 | CA   | GLU | A | 42 | 5.523 | -22.264 | -2.517 | 1.00 | 1.32  |
| ATOM | 474 | C    | GLU | A | 42 | 5.917 | -23.402 | -1.579 | 1.00 | 54.43 |
| ATOM | 475 | O    | GLU | A | 42 | 6.008 | -24.557 | -1.993 | 1.00 | 32.41 |
| ATOM | 476 | CB   | GLU | A | 42 | 6.017 | -22.562 | -3.934 | 1.00 | 74.01 |
| ATOM | 477 | CG   | GLU | A | 42 | 5.193 | -21.890 | -5.020 | 1.00 | 34.34 |
| ATOM | 478 | CD   | GLU | A | 42 | 5.478 | -22.451 | -6.399 | 1.00 | 53.45 |
| ATOM | 479 | OE1  | GLU | A | 42 | 5.848 | -21.662 | -7.294 | 1.00 | 63.13 |
| ATOM | 480 | OE2  | GLU | A | 42 | 5.330 | -23.677 | -6.585 | 1.00 | 3.43  |
| ATOM | 481 | H    | GLU | A | 42 | 6.985 | -20.751 | -2.281 | 1.00 | 12.31 |
| ATOM | 482 | HA   | GLU | A | 42 | 4.447 | -22.181 | -2.531 | 1.00 | 11.34 |
| ATOM | 483 | 2HB  | GLU | A | 42 | 7.039 | -22.224 | -4.025 | 1.00 | 75.41 |
| ATOM | 484 | 3HB  | GLU | A | 42 | 5.984 | -23.629 | -4.096 | 1.00 | 23.42 |
| ATOM | 485 | 2HG  | GLU | A | 42 | 4.145 | -22.033 | -4.799 | 1.00 | 63.54 |
| ATOM | 486 | 3HG  | GLU | A | 42 | 5.417 | -20.834 | -5.023 | 1.00 | 3.24  |
| ATOM | 487 | N    | SER | A | 43 | 6.149 | -23.065 | -0.315 | 1.00 | 21.14 |
| ATOM | 488 | CA   | SER | A | 43 | 6.537 | -24.057 | 0.681  | 1.00 | 2.14  |
| ATOM | 489 | C    | SER | A | 43 | 5.414 | -24.283 | 1.689  | 1.00 | 61.31 |
| ATOM | 490 | O    | SER | A | 43 | 5.043 | -23.378 | 2.435  | 1.00 | 25.43 |
| ATOM | 491 | CB   | SER | A | 43 | 7.807 | -23.611 | 1.408  | 1.00 | 4.21  |
| ATOM | 492 | OG   | SER | A | 43 | 8.784 | -24.638 | 1.406  | 1.00 | 54.12 |
| ATOM | 493 | H    | SER | A | 43 | 6.060 | -22.127 | -0.046 | 1.00 | 12.41 |
| ATOM | 494 | HA   | SER | A | 43 | 6.735 | -24.985 | 0.166  | 1.00 | 53.23 |
| ATOM | 495 | 2HB  | SER | A | 43 | 8.215 | -22.742 | 0.914  | 1.00 | 23.14 |
| ATOM | 496 | 3HB  | SER | A | 43 | 7.565 | -23.363 | 2.431  | 1.00 | 11.15 |
| ATOM | 497 | HG   | SER | A | 43 | 8.987 | -24.885 | 0.501  | 1.00 | 54.04 |
| ATOM | 498 | N    | ASN | A | 44 | 4.877 | -25.499 | 1.703  | 1.00 | 14.21 |
| ATOM | 499 | CA   | ASN | A | 44 | 3.795 | -25.846 | 2.618  | 1.00 | 40.50 |
| ATOM | 500 | C    | ASN | A | 44 | 4.196 | -25.569 | 4.064  | 1.00 | 52.22 |
| ATOM | 501 | O    | ASN | A | 44 | 5.285 | -25.944 | 4.501  | 1.00 | 52.25 |
| ATOM | 502 | CB   | ASN | A | 44 | 3.414 | -27.318 | 2.456  | 1.00 | 62.54 |
| ATOM | 503 | CG   | ASN | A | 44 | 2.235 | -27.511 | 1.521  | 1.00 | 25.21 |
| ATOM | 504 | ND2  | ASN | A | 44 | 2.326 | -28.512 | 0.653  | 1.00 | 21.44 |
| ATOM | 505 | OD1  | ASN | A | 44 | 1.255 | -26.769 | 1.579  | 1.00 | 2.22  |
| ATOM | 506 | H    | ASN | A | 44 | 5.215 | -26.179 | 1.084  | 1.00 | 52.34 |
| ATOM | 507 | HA   | ASN | A | 44 | 2.942 | -25.233 | 2.370  | 1.00 | 53.25 |
| ATOM | 508 | 2HB  | ASN | A | 44 | 4.259 | -27.860 | 2.055  | 1.00 | 73.23 |
| ATOM | 509 | 3HB  | ASN | A | 44 | 3.156 | -27.726 | 3.421  | 1.00 | 34.31 |
| ATOM | 510 | 1HD2 | ASN | A | 44 | 3.137 | -29.063 | 0.664  | 1.00 | 31.14 |
| ATOM | 511 | 2HD2 | ASN | A | 44 | 1.579 | -28.659 | 0.037  | 1.00 | 35.31 |
| ATOM | 512 | N    | LEU | A | 45 | 3.309 | -24.911 | 4.802  | 1.00 | 12.11 |
| ATOM | 513 | CA   | LEU | A | 45 | 3.569 | -24.584 | 6.200  | 1.00 | 72.01 |
| ATOM | 514 | C    | LEU | A | 45 | 3.432 | -25.820 | 7.083  | 1.00 | 70.32 |
| ATOM | 515 | O    | LEU | A | 45 | 4.233 | -26.036 | 7.993  | 1.00 | 34.50 |
| ATOM | 516 | CB   | LEU | A | 45 | 2.607 | -23.494 | 6.677  | 1.00 | 43.15 |
| ATOM | 517 | CG   | LEU | A | 45 | 2.623 | -22.189 | 5.879  | 1.00 | 62.40 |
| ATOM | 518 | CD1  | LEU | A | 45 | 1.632 | -21.195 | 6.463  | 1.00 | 53.23 |
| ATOM | 519 | CD2  | LEU | A | 45 | 4.024 | -21.596 | 5.854  | 1.00 | 24.43 |
| ATOM | 520 | H    | LEU | A | 45 | 2.459 | -24.638 | 4.399  | 1.00 | 73.31 |
| ATOM | 521 | HA   | LEU | A | 45 | 4.581 | -24.216 | 6.271  | 1.00 | 4.10  |
| ATOM | 522 | 2HB  | LEU | A | 45 | 1.606 | -23.895 | 6.635  | 1.00 | 43.34 |



|      |     |      |     |   |    |        |         |        |      |       |
|------|-----|------|-----|---|----|--------|---------|--------|------|-------|
| ATOM | 523 | 3HB  | LEU | A | 45 | 2.857  | -23.259 | 7.702  | 1.00 | 73.33 |
| ATOM | 524 | HG   | LEU | A | 45 | 2.328  | -22.395 | 4.859  | 1.00 | 11.32 |
| ATOM | 525 | 1HD1 | LEU | A | 45 | 2.063  | -20.727 | 7.335  | 1.00 | 54.34 |
| ATOM | 526 | 2HD1 | LEU | A | 45 | 0.726  | -21.712 | 6.742  | 1.00 | 13.22 |
| ATOM | 527 | 3HD1 | LEU | A | 45 | 1.402  | -20.440 | 5.724  | 1.00 | 30.45 |
| ATOM | 528 | 1HD2 | LEU | A | 45 | 4.601  | -22.002 | 6.673  | 1.00 | 54.41 |
| ATOM | 529 | 2HD2 | LEU | A | 45 | 3.962  | -20.522 | 5.955  | 1.00 | 64.31 |
| ATOM | 530 | 3HD2 | LEU | A | 45 | 4.504  | -21.844 | 4.919  | 1.00 | 74.01 |
| ATOM | 531 | N    | ILE | A | 46 | 2.414  | -26.629 | 6.806  | 1.00 | 5.33  |
| ATOM | 532 | CA   | ILE | A | 46 | 2.175  | -27.845 | 7.573  | 1.00 | 5.13  |
| ATOM | 533 | C    | ILE | A | 46 | 3.440  | -28.692 | 7.669  | 1.00 | 72.02 |
| ATOM | 534 | O    | ILE | A | 46 | 3.686  | -29.344 | 8.683  | 1.00 | 72.30 |
| ATOM | 535 | CB   | ILE | A | 46 | 1.050  | -28.691 | 6.950  | 1.00 | 33.43 |
| ATOM | 536 | CG1  | ILE | A | 46 | -0.257 | -27.896 | 6.915  | 1.00 | 3.35  |
| ATOM | 537 | CG2  | ILE | A | 46 | 0.867  | -29.986 | 7.729  | 1.00 | 44.31 |
| ATOM | 538 | CD1  | ILE | A | 46 | -1.285 | -28.463 | 5.962  | 1.00 | 23.51 |
| ATOM | 539 | H    | ILE | A | 46 | 1.811  | -26.402 | 6.069  | 1.00 | 72.54 |
| ATOM | 540 | HA   | ILE | A | 46 | 1.872  | -27.556 | 8.569  | 1.00 | 23.15 |
| ATOM | 541 | HB   | ILE | A | 46 | 1.336  | -28.944 | 5.941  | 1.00 | 42.01 |
| ATOM | 542 | 2HG1 | ILE | A | 46 | -0.691 | -27.885 | 7.903  | 1.00 | 60.14 |
| ATOM | 543 | 3HG1 | ILE | A | 46 | -0.044 | -26.882 | 6.609  | 1.00 | 4.45  |
| ATOM | 544 | 1HG2 | ILE | A | 46 | 1.183  | -30.820 | 7.119  | 1.00 | 0.35  |
| ATOM | 545 | 2HG2 | ILE | A | 46 | 1.465  | -29.952 | 8.628  | 1.00 | 54.33 |
| ATOM | 546 | 3HG2 | ILE | A | 46 | -0.173 | -30.105 | 7.991  | 1.00 | 1.24  |
| ATOM | 547 | 1HD1 | ILE | A | 46 | -1.636 | -29.414 | 6.335  | 1.00 | 21.31 |
| ATOM | 548 | 2HD1 | ILE | A | 46 | -2.115 | -27.779 | 5.878  | 1.00 | 35.43 |
| ATOM | 549 | 3HD1 | ILE | A | 46 | -0.835 | -28.604 | 4.990  | 1.00 | 42.35 |
| ATOM | 550 | N    | GLN | A | 47 | 4.238  | -28.675 | 6.607  | 1.00 | 64.25 |
| ATOM | 551 | CA   | GLN | A | 47 | 5.479  | -29.441 | 6.572  | 1.00 | 75.34 |
| ATOM | 552 | C    | GLN | A | 47 | 6.601  | -28.693 | 7.284  | 1.00 | 72.43 |
| ATOM | 553 | O    | GLN | A | 47 | 7.463  | -29.303 | 7.915  | 1.00 | 63.20 |
| ATOM | 554 | CB   | GLN | A | 47 | 5.882  | -29.733 | 5.125  | 1.00 | 32.32 |
| ATOM | 555 | CG   | GLN | A | 47 | 5.995  | -31.217 | 4.813  | 1.00 | 44.42 |
| ATOM | 556 | CD   | GLN | A | 47 | 7.421  | -31.725 | 4.904  | 1.00 | 12.30 |
| ATOM | 557 | NE2  | GLN | A | 47 | 8.180  | -31.556 | 3.828  | 1.00 | 52.34 |
| ATOM | 558 | OE1  | GLN | A | 47 | 7.836  | -32.263 | 5.931  | 1.00 | 74.53 |
| ATOM | 559 | H    | GLN | A | 47 | 3.988  | -28.136 | 5.829  | 1.00 | 53.34 |
| ATOM | 560 | HA   | GLN | A | 47 | 5.305  | -30.376 | 7.083  | 1.00 | 60.12 |
| ATOM | 561 | 2HB  | GLN | A | 47 | 5.144  | -29.303 | 4.464  | 1.00 | 32.45 |
| ATOM | 562 | 3HB  | GLN | A | 47 | 6.839  | -29.273 | 4.931  | 1.00 | 41.50 |
| ATOM | 563 | 2HG  | GLN | A | 47 | 5.388  | -31.767 | 5.516  | 1.00 | 61.21 |
| ATOM | 564 | 3HG  | GLN | A | 47 | 5.630  | -31.389 | 3.811  | 1.00 | 23.22 |
| ATOM | 565 | 1HE2 | GLN | A | 47 | 7.782  | -31.117 | 3.046  | 1.00 | 44.11 |
| ATOM | 566 | 2HE2 | GLN | A | 47 | 9.105  | -31.874 | 3.859  | 1.00 | 2.22  |
| ATOM | 567 | N    | ALA | A | 48 | 6.583  | -27.369 | 7.177  | 1.00 | 0.21  |
| ATOM | 568 | CA   | ALA | A | 48 | 7.598  | -26.538 | 7.812  | 1.00 | 1.43  |
| ATOM | 569 | C    | ALA | A | 48 | 7.534  | -26.658 | 9.331  | 1.00 | 3.51  |
| ATOM | 570 | O    | ALA | A | 48 | 8.466  | -27.153 | 9.964  | 1.00 | 13.21 |
| ATOM | 571 | CB   | ALA | A | 48 | 7.433  | -25.086 | 7.388  | 1.00 | 14.21 |
| ATOM | 572 | H    | ALA | A | 48 | 5.869  | -26.940 | 6.660  | 1.00 | 24.42 |
| ATOM | 573 | HA   | ALA | A | 48 | 8.567  | -26.877 | 7.475  | 1.00 | 72.42 |
| ATOM | 574 | 1HB  | ALA | A | 48 | 6.382  | -24.867 | 7.260  | 1.00 | 4.43  |
| ATOM | 575 | 2HB  | ALA | A | 48 | 7.846  | -24.440 | 8.148  | 1.00 | 11.40 |
| ATOM | 576 | 3HB  | ALA | A | 48 | 7.951  | -24.922 | 6.455  | 1.00 | 33.41 |
| ATOM | 577 | N    | GLY | A | 49 | 6.428  | -26.200 | 9.911  | 1.00 | 44.15 |
| ATOM | 578 | CA   | GLY | A | 49 | 6.265  | -26.264 | 11.351 | 1.00 | 35.50 |
| ATOM | 579 | C    | GLY | A | 49 | 4.997  | -25.579 | 11.822 | 1.00 | 41.14 |
| ATOM | 580 | O    | GLY | A | 49 | 4.966  | -24.988 | 12.902 | 1.00 | 23.10 |
| ATOM | 581 | H    | GLY | A | 49 | 5.718  | -25.815 | 9.355  | 1.00 | 22.12 |

|      |     |      |     |   |    |         |         |        |      |       |
|------|-----|------|-----|---|----|---------|---------|--------|------|-------|
| ATOM | 582 | 2HA  | GLY | A | 49 | 6.234   | -27.301 | 11.653 | 1.00 | 43.32 |
| ATOM | 583 | 3HA  | GLY | A | 49 | 7.113   | -25.788 | 11.820 | 1.00 | 11.10 |
| ATOM | 584 | N    | LEU | A | 50 | 3.949   | -25.655 | 11.009 | 1.00 | 33.24 |
| ATOM | 585 | CA   | LEU | A | 50 | 2.672   | -25.035 | 11.348 | 1.00 | 61.53 |
| ATOM | 586 | C    | LEU | A | 50 | 1.579   | -26.088 | 11.498 | 1.00 | 74.22 |
| ATOM | 587 | O    | LEU | A | 50 | 1.087   | -26.633 | 10.509 | 1.00 | 42.41 |
| ATOM | 588 | CB   | LEU | A | 50 | 2.275   | -24.021 | 10.274 | 1.00 | 1.31  |
| ATOM | 589 | CG   | LEU | A | 50 | 1.477   | -22.809 | 10.758 | 1.00 | 71.51 |
| ATOM | 590 | CD1  | LEU | A | 50 | 2.179   | -21.518 | 10.370 | 1.00 | 44.33 |
| ATOM | 591 | CD2  | LEU | A | 50 | 0.064   | -22.841 | 10.193 | 1.00 | 64.33 |
| ATOM | 592 | H    | LEU | A | 50 | 4.034   | -26.140 | 10.162 | 1.00 | 11.52 |
| ATOM | 593 | HA   | LEU | A | 50 | 2.793   | -24.522 | 12.290 | 1.00 | 74.00 |
| ATOM | 594 | 2HB  | LEU | A | 50 | 3.180   | -23.657 | 9.812  | 1.00 | 20.03 |
| ATOM | 595 | 3HB  | LEU | A | 50 | 1.679   | -24.538 | 9.536  | 1.00 | 52.12 |
| ATOM | 596 | HG   | LEU | A | 50 | 1.407   | -22.840 | 11.837 | 1.00 | 43.34 |
| ATOM | 597 | 1HD1 | LEU | A | 50 | 2.735   | -21.142 | 11.215 | 1.00 | 12.15 |
| ATOM | 598 | 2HD1 | LEU | A | 50 | 1.445   | -20.786 | 10.067 | 1.00 | 2.20  |
| ATOM | 599 | 3HD1 | LEU | A | 50 | 2.856   | -21.709 | 9.550  | 1.00 | 41.54 |
| ATOM | 600 | 1HD2 | LEU | A | 50 | -0.341  | -23.837 | 10.294 | 1.00 | 20.21 |
| ATOM | 601 | 2HD2 | LEU | A | 50 | 0.089   | -22.567 | 9.148  | 1.00 | 73.42 |
| ATOM | 602 | 3HD2 | LEU | A | 50 | -0.556  | -22.143 | 10.734 | 1.00 | 2.23  |
| ATOM | 603 | N    | ASP | A | 51 | 1.201   | -26.368 | 12.740 | 1.00 | 30.32 |
| ATOM | 604 | CA   | ASP | A | 51 | 0.163   | -27.353 | 13.020 | 1.00 | 32.41 |
| ATOM | 605 | C    | ASP | A | 51 | -1.188  | -26.886 | 12.486 | 1.00 | 22.14 |
| ATOM | 606 | O    | ASP | A | 51 | -1.305  | -25.838 | 12.416 | 1.00 | 54.22 |
| ATOM | 607 | CB   | ASP | A | 51 | 0.069   | -27.613 | 14.524 | 1.00 | 35.24 |
| ATOM | 608 | CG   | ASP | A | 51 | 0.423   | -29.041 | 14.889 | 1.00 | 64.43 |
| ATOM | 609 | OD1  | ASP | A | 51 | -0.505  | -29.838 | 15.141 | 1.00 | 0.13  |
| ATOM | 610 | OD2  | ASP | A | 51 | 1.630   | -29.363 | 14.920 | 1.00 | 15.13 |
| ATOM | 611 | H    | ASP | A | 51 | 1.630   | -25.901 | 13.487 | 1.00 | 4.32  |
| ATOM | 612 | HA   | ASP | A | 51 | 0.434   | -28.272 | 12.522 | 1.00 | 41.11 |
| ATOM | 613 | 2HB  | ASP | A | 51 | 0.748   | -26.950 | 15.041 | 1.00 | 73.41 |
| ATOM | 614 | 3HB  | ASP | A | 51 | -0.941  | -27.416 | 14.854 | 1.00 | 22.45 |
| ATOM | 615 | N    | SRP | A | 52 | -2.069  | -27.855 | 12.168 | 1.00 | 42.52 |
| ATOM | 616 | CA   | SRP | A | 52 | -3.392  | -27.499 | 11.648 | 1.00 | 65.44 |
| ATOM | 617 | C    | SRP | A | 52 | -4.005  | -26.434 | 12.518 | 1.00 | 0.14  |
| ATOM | 618 | O    | SRP | A | 52 | -4.571  | -25.502 | 11.945 | 1.00 | 31.55 |
| ATOM | 619 | CB   | SRP | A | 52 | -4.289  | -28.738 | 11.648 | 1.00 | 20.14 |
| ATOM | 620 | OG   | SRP | A | 52 | -5.035  | -28.785 | 12.866 | 1.00 | 14.12 |
| ATOM | 621 | CJ   | SRP | A | 52 | -7.895  | -28.111 | 13.366 | 1.00 | 75.50 |
| ATOM | 622 | CK   | SRP | A | 52 | -9.141  | -27.274 | 13.069 | 1.00 | 12.53 |
| ATOM | 623 | CL1  | SRP | A | 52 | -9.779  | -27.753 | 11.764 | 1.00 | 11.04 |
| ATOM | 624 | CL2  | SRP | A | 52 | -8.745  | -25.802 | 12.933 | 1.00 | 32.33 |
| ATOM | 625 | CL3  | SRP | A | 52 | -10.144 | -27.428 | 14.215 | 1.00 | 22.51 |
| ATOM | 626 | CM   | SRP | A | 52 | -11.142 | -26.300 | 14.165 | 1.00 | 62.01 |
| ATOM | 627 | OM   | SRP | A | 52 | -9.450  | -27.397 | 15.463 | 1.00 | 1.42  |
| ATOM | 628 | NN   | SRP | A | 52 | -12.285 | -26.442 | 13.465 | 1.00 | 2.42  |
| ATOM | 629 | ON   | SRP | A | 52 | -10.916 | -25.265 | 14.756 | 1.00 | 51.34 |
| ATOM | 630 | P    | SRP | A | 52 | -6.278  | -29.778 | 12.613 | 1.00 | 23.21 |
| ATOM | 631 | O1P  | SRP | A | 52 | -6.567  | -30.626 | 13.951 | 1.00 | 52.33 |
| ATOM | 632 | O2P  | SRP | A | 52 | -5.952  | -30.703 | 11.504 | 1.00 | 23.14 |
| ATOM | 633 | O3P  | SRP | A | 52 | -7.582  | -28.918 | 12.228 | 1.00 | 34.13 |
| ATOM | 634 | CO   | SRP | A | 52 | -13.212 | -25.314 | 13.343 | 1.00 | 32.35 |
| ATOM | 635 | CP   | SRP | A | 52 | -13.623 | -25.148 | 11.878 | 1.00 | 1.22  |
| ATOM | 636 | CQ   | SRP | A | 52 | -14.086 | -23.787 | 11.426 | 1.00 | 23.22 |
| ATOM | 637 | CS   | SRP | A | 52 | -14.050 | -21.932 | 9.846  | 1.00 | 75.33 |
| ATOM | 638 | CT   | SRP | A | 52 | -13.428 | -20.858 | 10.739 | 1.00 | 25.23 |
| ATOM | 639 | NR   | SRP | A | 52 | -13.601 | -23.255 | 10.286 | 1.00 | 21.13 |
| ATOM | 640 | OR   | SRP | A | 52 | -14.894 | -23.170 | 12.087 | 1.00 | 24.43 |

|      |     |      |     |   |    |         |         |        |      |       |
|------|-----|------|-----|---|----|---------|---------|--------|------|-------|
| ATOM | 641 | SU   | SRP | A | 52 | -14.625 | -19.521 | 11.001 | 1.00 | 12.42 |
| ATOM | 642 | H    | SRP | A | 52 | -1.828  | -28.787 | 12.283 | 1.00 | 22.35 |
| ATOM | 643 | HN   | SRP | A | 52 | -12.493 | -27.288 | 13.042 | 1.00 | 24.41 |
| ATOM | 644 | HA   | SRP | A | 52 | -3.292  | -27.123 | 10.629 | 1.00 | 20.30 |
| ATOM | 645 | 2HB  | SRP | A | 52 | -4.975  | -28.690 | 10.803 | 1.00 | 52.44 |
| ATOM | 646 | 3HB  | SRP | A | 52 | -3.673  | -29.634 | 11.565 | 1.00 | 5.41  |
| ATOM | 647 | 2HJ  | SRP | A | 52 | -8.086  | -28.755 | 14.226 | 1.00 | 51.45 |
| ATOM | 648 | 3HJ  | SRP | A | 52 | -7.057  | -27.451 | 13.585 | 1.00 | 11.21 |
| ATOM | 649 | 1HL1 | SRP | A | 52 | -10.622 | -27.109 | 11.514 | 1.00 | 62.42 |
| ATOM | 650 | 2HL1 | SRP | A | 52 | -9.041  | -27.713 | 10.963 | 1.00 | 2.53  |
| ATOM | 651 | 3HL1 | SRP | A | 52 | -10.128 | -28.778 | 11.885 | 1.00 | 23.02 |
| ATOM | 652 | 1HL2 | SRP | A | 52 | -8.435  | -25.418 | 13.905 | 1.00 | 42.43 |
| ATOM | 653 | 2HL2 | SRP | A | 52 | -7.921  | -25.712 | 12.226 | 1.00 | 3.44  |
| ATOM | 654 | 3HL2 | SRP | A | 52 | -9.598  | -25.228 | 12.571 | 1.00 | 12.21 |
| ATOM | 655 | HL3  | SRP | A | 52 | -10.666 | -28.380 | 14.114 | 1.00 | 70.50 |
| ATOM | 656 | HM   | SRP | A | 52 | -9.002  | -26.540 | 15.512 | 1.00 | 53.21 |
| ATOM | 657 | 2HO  | SRP | A | 52 | -14.098 | -25.505 | 13.949 | 1.00 | 43.23 |
| ATOM | 658 | 3HO  | SRP | A | 52 | -12.724 | -24.403 | 13.689 | 1.00 | 15.44 |
| ATOM | 659 | 2HP  | SRP | A | 52 | -12.666 | -25.381 | 11.411 | 1.00 | 32.11 |
| ATOM | 660 | 3HP  | SRP | A | 52 | -14.360 | -25.897 | 11.589 | 1.00 | 32.43 |
| ATOM | 661 | HR   | SRP | A | 52 | -12.954 | -23.748 | 9.757  | 1.00 | 31.23 |
| ATOM | 662 | 2HS  | SRP | A | 52 | -13.743 | -21.769 | 8.812  | 1.00 | 21.33 |
| ATOM | 663 | 3HS  | SRP | A | 52 | -15.137 | -21.877 | 9.914  | 1.00 | 23.11 |
| ATOM | 664 | 2HT  | SRP | A | 52 | -13.161 | -21.294 | 11.707 | 1.00 | 11.03 |
| ATOM | 665 | 3HT  | SRP | A | 52 | -12.536 | -20.458 | 10.258 | 1.00 | 5.43  |
| ATOM | 666 | HU   | SRP | A | 52 | -15.581 | -19.890 | 10.130 | 1.00 | 4.51  |
| ATOM | 667 | N    | ILE | A | 53 | -3.920  | -26.526 | 13.841 | 1.00 | 34.12 |
| ATOM | 668 | CA   | ILE | A | 53 | -4.500  | -25.514 | 14.716 | 1.00 | 72.25 |
| ATOM | 669 | C    | ILE | A | 53 | -4.062  | -24.113 | 14.301 | 1.00 | 34.53 |
| ATOM | 670 | O    | ILE | A | 53 | -4.878  | -23.195 | 14.223 | 1.00 | 53.14 |
| ATOM | 671 | CB   | ILE | A | 53 | -4.107  | -25.749 | 16.186 | 1.00 | 13.21 |
| ATOM | 672 | CG1  | ILE | A | 53 | -4.779  | -27.015 | 16.721 | 1.00 | 74.25 |
| ATOM | 673 | CG2  | ILE | A | 53 | -4.486  | -24.544 | 17.034 | 1.00 | 4.41  |
| ATOM | 674 | CD1  | ILE | A | 53 | -6.291  | -26.947 | 16.712 | 1.00 | 5.33  |
| ATOM | 675 | H    | ILE | A | 53 | -3.456  | -27.292 | 14.238 | 1.00 | 35.14 |
| ATOM | 676 | HA   | ILE | A | 53 | -5.576  | -25.582 | 14.636 | 1.00 | 43.01 |
| ATOM | 677 | HB   | ILE | A | 53 | -3.036  | -25.871 | 16.234 | 1.00 | 11.42 |
| ATOM | 678 | 2HG1 | ILE | A | 53 | -4.483  | -27.856 | 16.114 | 1.00 | 61.12 |
| ATOM | 679 | 3HG1 | ILE | A | 53 | -4.459  | -27.181 | 17.739 | 1.00 | 14.22 |
| ATOM | 680 | 1HG2 | ILE | A | 53 | -5.507  | -24.263 | 16.825 | 1.00 | 34.12 |
| ATOM | 681 | 2HG2 | ILE | A | 53 | -4.389  | -24.795 | 18.080 | 1.00 | 60.24 |
| ATOM | 682 | 3HG2 | ILE | A | 53 | -3.830  | -23.718 | 16.800 | 1.00 | 75.22 |
| ATOM | 683 | 1HD1 | ILE | A | 53 | -6.685  | -27.751 | 16.109 | 1.00 | 25.31 |
| ATOM | 684 | 2HD1 | ILE | A | 53 | -6.661  | -27.038 | 17.722 | 1.00 | 11.51 |
| ATOM | 685 | 3HD1 | ILE | A | 53 | -6.605  | -26.000 | 16.297 | 1.00 | 15.24 |
| ATOM | 686 | N    | ARG | A | 54 | -2.770  | -23.958 | 14.036 | 1.00 | 45.12 |
| ATOM | 687 | CA   | ARG | A | 54 | -2.223  | -22.669 | 13.629 | 1.00 | 61.13 |
| ATOM | 688 | C    | ARG | A | 54 | -2.985  | -22.109 | 12.432 | 1.00 | 55.24 |
| ATOM | 689 | O    | ARG | A | 54 | -3.170  | -20.897 | 12.311 | 1.00 | 12.15 |
| ATOM | 690 | CB   | ARG | A | 54 | -0.739  | -22.807 | 13.283 | 1.00 | 51.14 |
| ATOM | 691 | CG   | ARG | A | 54 | 0.156   | -22.980 | 14.498 | 1.00 | 4.14  |
| ATOM | 692 | CD   | ARG | A | 54 | 1.386   | -22.089 | 14.416 | 1.00 | 11.11 |
| ATOM | 693 | NE   | ARG | A | 54 | 2.067   | -21.976 | 15.703 | 1.00 | 65.32 |
| ATOM | 694 | CZ   | ARG | A | 54 | 2.832   | -22.934 | 16.216 | 1.00 | 51.12 |
| ATOM | 695 | NH1  | ARG | A | 54 | 3.012   | -24.069 | 15.554 | 1.00 | 14.05 |
| ATOM | 696 | NH2  | ARG | A | 54 | 3.419   | -22.757 | 17.393 | 1.00 | 51.14 |
| ATOM | 697 | H    | ARG | A | 54 | -2.169  | -24.728 | 14.116 | 1.00 | 5.14  |
| ATOM | 698 | HA   | ARG | A | 54 | -2.328  | -21.987 | 14.459 | 1.00 | 41.22 |
| ATOM | 699 | 2HB  | ARG | A | 54 | -0.609  | -23.667 | 12.642 | 1.00 | 0.20  |

|      |     |      |     |   |    |         |         |        |      |       |
|------|-----|------|-----|---|----|---------|---------|--------|------|-------|
| ATOM | 700 | 3HB  | ARG | A | 54 | -0.422  | -21.922 | 12.752 | 1.00 | 11.31 |
| ATOM | 701 | 2HG  | ARG | A | 54 | -0.403  | -22.721 | 15.386 | 1.00 | 62.54 |
| ATOM | 702 | 3HG  | ARG | A | 54 | 0.472   | -24.011 | 14.557 | 1.00 | 4.31  |
| ATOM | 703 | 2HD  | ARG | A | 54 | 2.070   | -22.508 | 13.693 | 1.00 | 52.31 |
| ATOM | 704 | 3HD  | ARG | A | 54 | 1.080   | -21.105 | 14.094 | 1.00 | 53.02 |
| ATOM | 705 | HE   | ARG | A | 54 | 1.948   | -21.146 | 16.208 | 1.00 | 4.23  |
| ATOM | 706 | 1HH1 | ARG | A | 54 | 2.571   | -24.205 | 14.667 | 1.00 | 4.31  |
| ATOM | 707 | 2HH1 | ARG | A | 54 | 3.589   | -24.788 | 15.942 | 1.00 | 13.05 |
| ATOM | 708 | 1HH2 | ARG | A | 54 | 3.286   | -21.903 | 17.894 | 1.00 | 50.51 |
| ATOM | 709 | 2HH2 | ARG | A | 54 | 3.994   | -23.478 | 17.778 | 1.00 | 72.12 |
| ATOM | 710 | N    | LEU | A | 55 | -3.426  | -22.998 | 11.548 | 1.00 | 24.14 |
| ATOM | 711 | CA   | LEU | A | 55 | -4.168  | -22.593 | 10.360 | 1.00 | 51.02 |
| ATOM | 712 | C    | LEU | A | 55 | -5.337  | -21.686 | 10.731 | 1.00 | 40.12 |
| ATOM | 713 | O    | LEU | A | 55 | -5.436  | -20.557 | 10.250 | 1.00 | 32.34 |
| ATOM | 714 | CB   | LEU | A | 55 | -4.681  | -23.824 | 9.611  | 1.00 | 61.05 |
| ATOM | 715 | CG   | LEU | A | 55 | -4.723  | -23.713 | 8.086  | 1.00 | 1.31  |
| ATOM | 716 | CD1  | LEU | A | 55 | -5.612  | -22.555 | 7.660  | 1.00 | 44.33 |
| ATOM | 717 | CD2  | LEU | A | 55 | -3.318  | -23.544 | 7.525  | 1.00 | 75.42 |
| ATOM | 718 | H    | LEU | A | 55 | -3.248  | -23.950 | 11.698 | 1.00 | 2.31  |
| ATOM | 719 | HA   | LEU | A | 55 | -3.493  | -22.046 | 9.718  | 1.00 | 34.21 |
| ATOM | 720 | 2HB  | LEU | A | 55 | -4.041  | -24.655 | 9.864  | 1.00 | 71.34 |
| ATOM | 721 | 3HB  | LEU | A | 55 | -5.685  | -24.026 | 9.956  | 1.00 | 22.24 |
| ATOM | 722 | HG   | LEU | A | 55 | -5.141  | -24.622 | 7.676  | 1.00 | 0.04  |
| ATOM | 723 | 1HD1 | LEU | A | 55 | -6.288  | -22.886 | 6.886  | 1.00 | 44.31 |
| ATOM | 724 | 2HD1 | LEU | A | 55 | -4.998  | -21.750 | 7.282  | 1.00 | 70.31 |
| ATOM | 725 | 3HD1 | LEU | A | 55 | -6.179  | -22.205 | 8.510  | 1.00 | 75.05 |
| ATOM | 726 | 1HD2 | LEU | A | 55 | -2.688  | -24.343 | 7.888  | 1.00 | 73.05 |
| ATOM | 727 | 2HD2 | LEU | A | 55 | -2.915  | -22.594 | 7.844  | 1.00 | 62.30 |
| ATOM | 728 | 3HD2 | LEU | A | 55 | -3.356  | -23.576 | 6.446  | 1.00 | 22.41 |
| ATOM | 729 | N    | MET | A | 56 | -6.218  | -22.187 | 11.590 | 1.00 | 15.20 |
| ATOM | 730 | CA   | MET | A | 56 | -7.379  | -21.420 | 12.028 | 1.00 | 2.22  |
| ATOM | 731 | C    | MET | A | 56 | -6.948  | -20.154 | 12.763 | 1.00 | 31.40 |
| ATOM | 732 | O    | MET | A | 56 | -7.430  | -19.060 | 12.469 | 1.00 | 32.43 |
| ATOM | 733 | CB   | MET | A | 56 | -8.268  | -22.273 | 12.935 | 1.00 | 2.33  |
| ATOM | 734 | CG   | MET | A | 56 | -9.700  | -21.771 | 13.028 | 1.00 | 22.31 |
| ATOM | 735 | SD   | MET | A | 56 | -9.879  | -20.390 | 14.173 | 1.00 | 52.11 |
| ATOM | 736 | CE   | MET | A | 56 | -9.225  | -21.109 | 15.677 | 1.00 | 31.51 |
| ATOM | 737 | H    | MET | A | 56 | -6.086  | -23.093 | 11.939 | 1.00 | 63.13 |
| ATOM | 738 | HA   | MET | A | 56 | -7.940  | -21.139 | 11.150 | 1.00 | 15.41 |
| ATOM | 739 | 2HB  | MET | A | 56 | -8.287  | -23.283 | 12.554 | 1.00 | 2.22  |
| ATOM | 740 | 3HB  | MET | A | 56 | -7.847  | -22.279 | 13.930 | 1.00 | 62.34 |
| ATOM | 741 | 2HG  | MET | A | 56 | -10.020 | -21.451 | 12.048 | 1.00 | 63.02 |
| ATOM | 742 | 3HG  | MET | A | 56 | -10.329 | -22.583 | 13.362 | 1.00 | 13.35 |
| ATOM | 743 | 1HE  | MET | A | 56 | -8.301  | -20.617 | 15.940 | 1.00 | 41.42 |
| ATOM | 744 | 2HE  | MET | A | 56 | -9.940  | -20.984 | 16.476 | 1.00 | 13.24 |
| ATOM | 745 | 3HE  | MET | A | 56 | -9.040  | -22.162 | 15.521 | 1.00 | 60.50 |
| ATOM | 746 | N    | ARG | A | 57 | -6.039  | -20.311 | 13.719 | 1.00 | 24.23 |
| ATOM | 747 | CA   | ARG | A | 57 | -5.545  | -19.181 | 14.497 | 1.00 | 63.13 |
| ATOM | 748 | C    | ARG | A | 57 | -5.069  | -18.057 | 13.581 | 1.00 | 72.34 |
| ATOM | 749 | O    | ARG | A | 57 | -5.138  | -16.881 | 13.938 | 1.00 | 63.32 |
| ATOM | 750 | CB   | ARG | A | 57 | -4.402  | -19.625 | 15.412 | 1.00 | 13.03 |
| ATOM | 751 | CG   | ARG | A | 57 | -4.752  | -19.574 | 16.891 | 1.00 | 44.04 |
| ATOM | 752 | CD   | ARG | A | 57 | -3.685  | -18.842 | 17.690 | 1.00 | 12.02 |
| ATOM | 753 | NE   | ARG | A | 57 | -4.147  | -18.497 | 19.032 | 1.00 | 73.20 |
| ATOM | 754 | CZ   | ARG | A | 57 | -3.340  | -18.094 | 20.006 | 1.00 | 4.34  |
| ATOM | 755 | NH1  | ARG | A | 57 | -2.036  | -17.985 | 19.789 | 1.00 | 13.41 |
| ATOM | 756 | NH2  | ARG | A | 57 | -3.836  | -17.798 | 21.201 | 1.00 | 5.11  |
| ATOM | 757 | H    | ARG | A | 57 | -5.692  | -21.209 | 13.907 | 1.00 | 1.52  |
| ATOM | 758 | HA   | ARG | A | 57 | -6.359  | -18.815 | 15.104 | 1.00 | 41.33 |

|      |     |      |     |   |    |         |         |        |      |       |
|------|-----|------|-----|---|----|---------|---------|--------|------|-------|
| ATOM | 759 | 2HB  | ARG | A | 57 | -4.131  | -20.641 | 15.164 | 1.00 | 11.31 |
| ATOM | 760 | 3HB  | ARG | A | 57 | -3.551  | -18.982 | 15.243 | 1.00 | 35.33 |
| ATOM | 761 | 2HG  | ARG | A | 57 | -5.693  | -19.058 | 17.011 | 1.00 | 31.41 |
| ATOM | 762 | 3HG  | ARG | A | 57 | -4.841  | -20.583 | 17.265 | 1.00 | 41.13 |
| ATOM | 763 | 2HD  | ARG | A | 57 | -2.816  | -19.477 | 17.772 | 1.00 | 62.24 |
| ATOM | 764 | 3HD  | ARG | A | 57 | -3.421  | -17.936 | 17.166 | 1.00 | 4.43  |
| ATOM | 765 | HE   | ARG | A | 57 | -5.107  | -18.571 | 19.214 | 1.00 | 1.33  |
| ATOM | 766 | 1HH1 | ARG | A | 57 | -1.660  | -18.206 | 18.890 | 1.00 | 40.24 |
| ATOM | 767 | 2HH1 | ARG | A | 57 | -1.430  | -17.679 | 20.524 | 1.00 | 34.42 |
| ATOM | 768 | 1HH2 | ARG | A | 57 | -4.818  | -17.879 | 21.369 | 1.00 | 44.25 |
| ATOM | 769 | 2HH2 | ARG | A | 57 | -3.227  | -17.495 | 21.934 | 1.00 | 50.44 |
| ATOM | 770 | N    | TRP | A | 58 | -4.588  | -18.428 | 12.400 | 1.00 | 44.22 |
| ATOM | 771 | CA   | TRP | A | 58 | -4.100  | -17.451 | 11.433 | 1.00 | 51.23 |
| ATOM | 772 | C    | TRP | A | 58 | -5.258  | -16.691 | 10.796 | 1.00 | 53.22 |
| ATOM | 773 | O    | TRP | A | 58 | -5.145  | -15.500 | 10.500 | 1.00 | 20.42 |
| ATOM | 774 | CB   | TRP | A | 58 | -3.272  | -18.144 | 10.350 | 1.00 | 61.13 |
| ATOM | 775 | CG   | TRP | A | 58 | -1.796  | -17.937 | 10.507 | 1.00 | 22.22 |
| ATOM | 776 | CD1  | TRP | A | 58 | -0.824  | -18.896 | 10.459 | 1.00 | 51.41 |
| ATOM | 777 | CD2  | TRP | A | 58 | -1.125  | -16.694 | 10.740 | 1.00 | 21.12 |
| ATOM | 778 | CE2  | TRP | A | 58 | 0.253   | -16.974 | 10.822 | 1.00 | 44.51 |
| ATOM | 779 | CE3  | TRP | A | 58 | -1.554  | -15.372 | 10.886 | 1.00 | 63.13 |
| ATOM | 780 | NE1  | TRP | A | 58 | 0.411   | -18.323 | 10.648 | 1.00 | 74.10 |
| ATOM | 781 | CZ2  | TRP | A | 58 | 1.202   | -15.979 | 11.044 | 1.00 | 63.22 |
| ATOM | 782 | CZ3  | TRP | A | 58 | -0.611  | -14.386 | 11.106 | 1.00 | 24.42 |
| ATOM | 783 | CH2  | TRP | A | 58 | 0.754   | -14.694 | 11.183 | 1.00 | 44.43 |
| ATOM | 784 | H    | TRP | A | 58 | -4.559  | -19.381 | 12.172 | 1.00 | 22.04 |
| ATOM | 785 | HA   | TRP | A | 58 | -3.471  | -16.749 | 11.960 | 1.00 | 30.02 |
| ATOM | 786 | 2HB  | TRP | A | 58 | -3.465  | -19.206 | 10.382 | 1.00 | 1.10  |
| ATOM | 787 | 3HB  | TRP | A | 58 | -3.562  | -17.758 | 9.383  | 1.00 | 31.41 |
| ATOM | 788 | HD1  | TRP | A | 58 | -1.014  | -19.946 | 10.297 | 1.00 | 5.32  |
| ATOM | 789 | HE1  | TRP | A | 58 | 1.265   | -18.804 | 10.655 | 1.00 | 2.32  |
| ATOM | 790 | HE3  | TRP | A | 58 | -2.601  | -15.115 | 10.830 | 1.00 | 73.42 |
| ATOM | 791 | HZ2  | TRP | A | 58 | 2.258   | -16.200 | 11.105 | 1.00 | 41.23 |
| ATOM | 792 | HZ3  | TRP | A | 58 | -0.923  | -13.359 | 11.222 | 1.00 | 54.14 |
| ATOM | 793 | HH2  | TRP | A | 58 | 1.455   | -13.892 | 11.356 | 1.00 | 4.04  |
| ATOM | 794 | N    | LEU | A | 59 | -6.372  | -17.385 | 10.587 | 1.00 | 43.42 |
| ATOM | 795 | CA   | LEU | A | 59 | -7.552  | -16.774 | 9.985  | 1.00 | 61.14 |
| ATOM | 796 | C    | LEU | A | 59 | -7.919  | -15.477 | 10.699 | 1.00 | 22.30 |
| ATOM | 797 | O    | LEU | A | 59 | -8.400  | -14.529 | 10.078 | 1.00 | 10.13 |
| ATOM | 798 | CB   | LEU | A | 59 | -8.732  | -17.746 | 10.030 | 1.00 | 73.15 |
| ATOM | 799 | CG   | LEU | A | 59 | -10.037 | -17.246 | 9.409  | 1.00 | 34.13 |
| ATOM | 800 | CD1  | LEU | A | 59 | -9.759  | -16.476 | 8.128  | 1.00 | 62.12 |
| ATOM | 801 | CD2  | LEU | A | 59 | -10.980 | -18.410 | 9.140  | 1.00 | 12.12 |
| ATOM | 802 | H    | LEU | A | 59 | -6.402  | -18.330 | 10.843 | 1.00 | 10.51 |
| ATOM | 803 | HA   | LEU | A | 59 | -7.320  | -16.550 | 8.954  | 1.00 | 4.01  |
| ATOM | 804 | 2HB  | LEU | A | 59 | -8.441  | -18.644 | 9.507  | 1.00 | 20.20 |
| ATOM | 805 | 3HB  | LEU | A | 59 | -8.926  | -17.982 | 11.066 | 1.00 | 13.44 |
| ATOM | 806 | HG   | LEU | A | 59 | -10.524 | -16.574 | 10.103 | 1.00 | 41.12 |
| ATOM | 807 | 1HD1 | LEU | A | 59 | -8.843  | -16.836 | 7.683  | 1.00 | 34.14 |
| ATOM | 808 | 2HD1 | LEU | A | 59 | -9.660  | -15.425 | 8.354  | 1.00 | 53.32 |
| ATOM | 809 | 3HD1 | LEU | A | 59 | -10.576 | -16.620 | 7.437  | 1.00 | 74.15 |
| ATOM | 810 | 1HD2 | LEU | A | 59 | -11.279 | -18.855 | 10.078 | 1.00 | 44.10 |
| ATOM | 811 | 2HD2 | LEU | A | 59 | -10.476 | -19.149 | 8.535  | 1.00 | 25.44 |
| ATOM | 812 | 3HD2 | LEU | A | 59 | -11.854 | -18.052 | 8.617  | 1.00 | 12.51 |
| ATOM | 813 | N    | HIS | A | 60 | -7.686  | -15.442 | 12.007 | 1.00 | 33.34 |
| ATOM | 814 | CA   | HIS | A | 60 | -7.990  | -14.260 | 12.806 | 1.00 | 22.34 |
| ATOM | 815 | C    | HIS | A | 60 | -7.293  | -13.027 | 12.239 | 1.00 | 71.42 |
| ATOM | 816 | O    | HIS | A | 60 | -7.904  | -11.968 | 12.097 | 1.00 | 3.13  |
| ATOM | 817 | CB   | HIS | A | 60 | -7.564  | -14.478 | 14.259 | 1.00 | 52.42 |

|      |     |     |     |   |    |         |         |        |      |       |
|------|-----|-----|-----|---|----|---------|---------|--------|------|-------|
| ATOM | 818 | CG  | HIS | A | 60 | -8.671  | -14.968 | 15.140 | 1.00 | 13.13 |
| ATOM | 819 | CD2 | HIS | A | 60 | -9.824  | -15.610 | 14.839 | 1.00 | 32.24 |
| ATOM | 820 | ND1 | HIS | A | 60 | -8.666  | -14.815 | 16.511 | 1.00 | 51.23 |
| ATOM | 821 | CE1 | HIS | A | 60 | -9.767  | -15.343 | 17.015 | 1.00 | 61.32 |
| ATOM | 822 | NE2 | HIS | A | 60 | -10.487 | -15.832 | 16.021 | 1.00 | 30.34 |
| ATOM | 823 | H   | HIS | A | 60 | -7.301  | -16.230 | 12.445 | 1.00 | 14.44 |
| ATOM | 824 | HA  | HIS | A | 60 | -9.057  | -14.103 | 12.773 | 1.00 | 51.40 |
| ATOM | 825 | 2HB | HIS | A | 60 | -6.769  | -15.208 | 14.289 | 1.00 | 51.15 |
| ATOM | 826 | 3HB | HIS | A | 60 | -7.204  | -13.543 | 14.665 | 1.00 | 32.43 |
| ATOM | 827 | HD1 | HIS | A | 60 | -7.960  | -14.385 | 17.036 | 1.00 | 42.53 |
| ATOM | 828 | HD2 | HIS | A | 60 | -10.161 | -15.896 | 13.853 | 1.00 | 40.03 |
| ATOM | 829 | HE1 | HIS | A | 60 | -10.034 | -15.371 | 18.061 | 1.00 | 43.34 |
| ATOM | 830 | N   | TRP | A | 61 | -6.013  | -13.173 | 11.917 | 1.00 | 71.24 |
| ATOM | 831 | CA  | TRP | A | 61 | -5.234  | -12.071 | 11.365 | 1.00 | 5.42  |
| ATOM | 832 | C   | TRP | A | 61 | -5.847  | -11.568 | 10.063 | 1.00 | 63.32 |
| ATOM | 833 | O   | TRP | A | 61 | -5.835  | -10.370 | 9.782  | 1.00 | 51.34 |
| ATOM | 834 | CB  | TRP | A | 61 | -3.788  | -12.510 | 11.127 | 1.00 | 71.35 |
| ATOM | 835 | CG  | TRP | A | 61 | -2.966  | -11.484 | 10.408 | 1.00 | 41.40 |
| ATOM | 836 | CD1 | TRP | A | 61 | -2.478  | -10.317 | 10.924 | 1.00 | 41.02 |
| ATOM | 837 | CD2 | TRP | A | 61 | -2.538  | -11.531 | 9.043  | 1.00 | 42.04 |
| ATOM | 838 | CE2 | TRP | A | 61 | -1.793  | -10.360 | 8.799  | 1.00 | 73.35 |
| ATOM | 839 | CE3 | TRP | A | 61 | -2.709  | -12.449 | 8.003  | 1.00 | 30.11 |
| ATOM | 840 | NE1 | TRP | A | 61 | -1.772  | -9.636  | 9.961  | 1.00 | 32.21 |
| ATOM | 841 | CZ2 | TRP | A | 61 | -1.224  | -10.086 | 7.558  | 1.00 | 3.11  |
| ATOM | 842 | CZ3 | TRP | A | 61 | -2.143  | -12.175 | 6.772  | 1.00 | 33.15 |
| ATOM | 843 | CH2 | TRP | A | 61 | -1.407  | -11.002 | 6.558  | 1.00 | 33.14 |
| ATOM | 844 | H   | TRP | A | 61 | -5.581  | -14.043 | 12.053 | 1.00 | 54.24 |
| ATOM | 845 | HA  | TRP | A | 61 | -5.241  | -11.267 | 12.087 | 1.00 | 53.02 |
| ATOM | 846 | 2HB | TRP | A | 61 | -3.317  | -12.709 | 12.077 | 1.00 | 1.55  |
| ATOM | 847 | 3HB | TRP | A | 61 | -3.788  | -13.413 | 10.533 | 1.00 | 22.44 |
| ATOM | 848 | HD1 | TRP | A | 61 | -2.634  | -9.990  | 11.940 | 1.00 | 4.43  |
| ATOM | 849 | HE1 | TRP | A | 61 | -1.325  | -8.773  | 10.088 | 1.00 | 61.03 |
| ATOM | 850 | HE3 | TRP | A | 61 | -3.273  | -13.359 | 8.149  | 1.00 | 42.24 |
| ATOM | 851 | HZ2 | TRP | A | 61 | -0.653  | -9.187  | 7.377  | 1.00 | 11.54 |
| ATOM | 852 | HZ3 | TRP | A | 61 | -2.265  | -12.873 | 5.957  | 1.00 | 55.20 |
| ATOM | 853 | HH2 | TRP | A | 61 | -0.984  | -10.829 | 5.581  | 1.00 | 24.22 |
| ATOM | 854 | N   | PHE | A | 62 | -6.382  | -12.492 | 9.271  | 1.00 | 11.40 |
| ATOM | 855 | CA  | PHE | A | 62 | -7.000  | -12.141 | 7.997  | 1.00 | 23.43 |
| ATOM | 856 | C   | PHE | A | 62 | -8.302  | -11.377 | 8.216  | 1.00 | 32.22 |
| ATOM | 857 | O   | PHE | A | 62 | -8.490  | -10.284 | 7.683  | 1.00 | 41.25 |
| ATOM | 858 | CB  | PHE | A | 62 | -7.267  | -13.402 | 7.172  | 1.00 | 34.15 |
| ATOM | 859 | CG  | PHE | A | 62 | -6.025  | -14.013 | 6.591  | 1.00 | 43.02 |
| ATOM | 860 | CD1 | PHE | A | 62 | -5.420  | -15.100 | 7.201  | 1.00 | 75.53 |
| ATOM | 861 | CD2 | PHE | A | 62 | -5.460  | -13.499 | 5.434  | 1.00 | 34.22 |
| ATOM | 862 | CE1 | PHE | A | 62 | -4.277  | -15.665 | 6.668  | 1.00 | 60.32 |
| ATOM | 863 | CE2 | PHE | A | 62 | -4.317  | -14.060 | 4.897  | 1.00 | 74.14 |
| ATOM | 864 | CZ  | PHE | A | 62 | -3.724  | -15.144 | 5.515  | 1.00 | 52.43 |
| ATOM | 865 | H   | PHE | A | 62 | -6.361  | -13.431 | 9.550  | 1.00 | 23.20 |
| ATOM | 866 | HA  | PHE | A | 62 | -6.311  | -11.509 | 7.459  | 1.00 | 52.22 |
| ATOM | 867 | 2HB | PHE | A | 62 | -7.737  | -14.143 | 7.802  | 1.00 | 0.32  |
| ATOM | 868 | 3HB | PHE | A | 62 | -7.931  | -13.156 | 6.357  | 1.00 | 2.22  |
| ATOM | 869 | HD1 | PHE | A | 62 | -5.852  | -15.509 | 8.104  | 1.00 | 73.35 |
| ATOM | 870 | HD2 | PHE | A | 62 | -5.922  | -12.651 | 4.950  | 1.00 | 33.32 |
| ATOM | 871 | HE1 | PHE | A | 62 | -3.816  | -16.512 | 7.154  | 1.00 | 70.31 |
| ATOM | 872 | HE2 | PHE | A | 62 | -3.887  | -13.650 | 3.995  | 1.00 | 21.21 |
| ATOM | 873 | HZ  | PHE | A | 62 | -2.831  | -15.584 | 5.096  | 1.00 | 14.43 |
| ATOM | 874 | N   | ARG | A | 63 | -9.199  | -11.961 | 9.004  | 1.00 | 23.43 |
| ATOM | 875 | CA  | ARG | A | 63 | -10.484 | -11.337 | 9.293  | 1.00 | 73.32 |
| ATOM | 876 | C   | ARG | A | 63 | -10.291 | -9.964  | 9.929  | 1.00 | 33.03 |

|      |     |      |     |   |    |         |         |        |      |       |
|------|-----|------|-----|---|----|---------|---------|--------|------|-------|
| ATOM | 877 | O    | ARG | A | 63 | -11.063 | -9.038  | 9.680  | 1.00 | 52.21 |
| ATOM | 878 | CB   | ARG | A | 63 | -11.312 | -12.229 | 10.220 | 1.00 | 23.42 |
| ATOM | 879 | CG   | ARG | A | 63 | -12.010 | -13.373 | 9.502  | 1.00 | 2.22  |
| ATOM | 880 | CD   | ARG | A | 63 | -13.451 | -13.523 | 9.963  | 1.00 | 10.04 |
| ATOM | 881 | NE   | ARG | A | 63 | -14.007 | -14.825 | 9.607  | 1.00 | 60.53 |
| ATOM | 882 | CZ   | ARG | A | 63 | -14.432 | -15.134 | 8.387  | 1.00 | 54.24 |
| ATOM | 883 | NH1  | ARG | A | 63 | -14.365 | -14.238 | 7.411  | 1.00 | 33.05 |
| ATOM | 884 | NH2  | ARG | A | 63 | -14.926 | -16.341 | 8.140  | 1.00 | 43.30 |
| ATOM | 885 | H    | ARG | A | 63 | -8.991  | -12.833 | 9.401  | 1.00 | 72.43 |
| ATOM | 886 | HA   | ARG | A | 63 | -11.012 | -11.217 | 8.359  | 1.00 | 60.04 |
| ATOM | 887 | 2HB  | ARG | A | 63 | -10.660 | -12.650 | 10.972 | 1.00 | 60.22 |
| ATOM | 888 | 3HB  | ARG | A | 63 | -12.063 | -11.625 | 10.705 | 1.00 | 54.13 |
| ATOM | 889 | 2HG  | ARG | A | 63 | -12.002 | -13.177 | 8.440  | 1.00 | 11.10 |
| ATOM | 890 | 3HG  | ARG | A | 63 | -11.478 | -14.291 | 9.705  | 1.00 | 52.51 |
| ATOM | 891 | 2HD  | ARG | A | 63 | -13.485 | -13.410 | 11.037 | 1.00 | 53.54 |
| ATOM | 892 | 3HD  | ARG | A | 63 | -14.045 | -12.749 | 9.501  | 1.00 | 72.13 |
| ATOM | 893 | HE   | ARG | A | 63 | -14.066 | -15.502 | 10.312 | 1.00 | 23.52 |
| ATOM | 894 | 1HH1 | ARG | A | 63 | -13.993 | -13.328 | 7.594  | 1.00 | 31.22 |
| ATOM | 895 | 2HH1 | ARG | A | 63 | -14.685 | -14.473 | 6.493  | 1.00 | 32.13 |
| ATOM | 896 | 1HH2 | ARG | A | 63 | -14.978 | -17.019 | 8.873  | 1.00 | 44.35 |
| ATOM | 897 | 2HH2 | ARG | A | 63 | -15.246 | -16.572 | 7.222  | 1.00 | 43.33 |
| ATOM | 898 | N    | LYS | A | 64 | -9.256  | -9.840  | 10.753 | 1.00 | 14.23 |
| ATOM | 899 | CA   | LYS | A | 64 | -8.960  | -8.580  | 11.426 | 1.00 | 71.51 |
| ATOM | 900 | C    | LYS | A | 64 | -8.616  | -7.492  | 10.415 | 1.00 | 43.52 |
| ATOM | 901 | O    | LYS | A | 64 | -9.111  | -6.369  | 10.505 | 1.00 | 75.35 |
| ATOM | 902 | CB   | LYS | A | 64 | -7.801  | -8.764  | 12.409 | 1.00 | 54.34 |
| ATOM | 903 | CG   | LYS | A | 64 | -8.217  | -8.658  | 13.866 | 1.00 | 71.13 |
| ATOM | 904 | CD   | LYS | A | 64 | -7.674  | -9.816  | 14.686 | 1.00 | 42.01 |
| ATOM | 905 | CE   | LYS | A | 64 | -6.153  | -9.846  | 14.669 | 1.00 | 12.10 |
| ATOM | 906 | NZ   | LYS | A | 64 | -5.611  | -10.953 | 15.504 | 1.00 | 21.12 |
| ATOM | 907 | H    | LYS | A | 64 | -8.677  | -10.615 | 10.912 | 1.00 | 4.44  |
| ATOM | 908 | HA   | LYS | A | 64 | -9.841  | -8.281  | 11.973 | 1.00 | 32.31 |
| ATOM | 909 | 2HB  | LYS | A | 64 | -7.362  | -9.738  | 12.251 | 1.00 | 40.41 |
| ATOM | 910 | 3HB  | LYS | A | 64 | -7.056  | -8.006  | 12.213 | 1.00 | 71.11 |
| ATOM | 911 | 2HG  | LYS | A | 64 | -7.837  | -7.733  | 14.273 | 1.00 | 30.01 |
| ATOM | 912 | 3HG  | LYS | A | 64 | -9.296  | -8.663  | 13.924 | 1.00 | 54.32 |
| ATOM | 913 | 2HD  | LYS | A | 64 | -8.009  | -9.711  | 15.707 | 1.00 | 20.21 |
| ATOM | 914 | 3HD  | LYS | A | 64 | -8.048  | -10.743 | 14.276 | 1.00 | 71.34 |
| ATOM | 915 | 2HE  | LYS | A | 64 | -5.820  | -9.978  | 13.651 | 1.00 | 11.01 |
| ATOM | 916 | 3HE  | LYS | A | 64 | -5.784  | -8.905  | 15.049 | 1.00 | 24.04 |
| ATOM | 917 | 1HZ  | LYS | A | 64 | -4.711  | -11.292 | 15.107 | 1.00 | 0.23  |
| ATOM | 918 | 2HZ  | LYS | A | 64 | -6.285  | -11.745 | 15.530 | 1.00 | 42.44 |
| ATOM | 919 | 3HZ  | LYS | A | 64 | -5.446  | -10.621 | 16.476 | 1.00 | 41.45 |
| ATOM | 920 | N    | ASN | A | 65 | -7.764  | -7.832  | 9.453  | 1.00 | 54.35 |
| ATOM | 921 | CA   | ASN | A | 65 | -7.355  | -6.883  | 8.424  | 1.00 | 42.53 |
| ATOM | 922 | C    | ASN | A | 65 | -8.510  | -6.576  | 7.475  | 1.00 | 30.05 |
| ATOM | 923 | O    | ASN | A | 65 | -8.445  | -5.636  | 6.684  | 1.00 | 21.22 |
| ATOM | 924 | CB   | ASN | A | 65 | -6.166  | -7.435  | 7.635  | 1.00 | 3.11  |
| ATOM | 925 | CG   | ASN | A | 65 | -4.936  | -7.627  | 8.502  | 1.00 | 73.31 |
| ATOM | 926 | ND2  | ASN | A | 65 | -3.825  | -8.000  | 7.878  | 1.00 | 40.22 |
| ATOM | 927 | OD1  | ASN | A | 65 | -4.986  | -7.443  | 9.718  | 1.00 | 4.31  |
| ATOM | 928 | H    | ASN | A | 65 | -7.403  | -8.742  | 9.434  | 1.00 | 64.33 |
| ATOM | 929 | HA   | ASN | A | 65 | -7.056  | -5.969  | 8.916  | 1.00 | 71.23 |
| ATOM | 930 | 2HB  | ASN | A | 65 | -6.436  | -8.391  | 7.211  | 1.00 | 50.14 |
| ATOM | 931 | 3HB  | ASN | A | 65 | -5.919  | -6.749  | 6.839  | 1.00 | 50.11 |
| ATOM | 932 | 1HD2 | ASN | A | 65 | -3.860  | -8.128  | 6.907  | 1.00 | 62.04 |
| ATOM | 933 | 2HD2 | ASN | A | 65 | -3.016  | -8.132  | 8.414  | 1.00 | 25.01 |
| ATOM | 934 | N    | GLY | A | 66 | -9.568  | -7.377  | 7.562  | 1.00 | 12.40 |
| ATOM | 935 | CA   | GLY | A | 66 | -10.723 | -7.175  | 6.707  | 1.00 | 52.41 |

|      |     |      |     |   |    |         |         |       |      |       |
|------|-----|------|-----|---|----|---------|---------|-------|------|-------|
| ATOM | 936 | C    | GLY | A | 66 | -10.772 | -8.160  | 5.556 | 1.00 | 31.02 |
| ATOM | 937 | O    | GLY | A | 66 | -11.256 | -7.835  | 4.472 | 1.00 | 74.32 |
| ATOM | 938 | H    | GLY | A | 66 | -9.564  | -8.110  | 8.212 | 1.00 | 74.41 |
| ATOM | 939 | 2HA  | GLY | A | 66 | -11.619 | -7.284  | 7.299 | 1.00 | 14.31 |
| ATOM | 940 | 3HA  | GLY | A | 66 | -10.689 | -6.172  | 6.306 | 1.00 | 63.23 |
| ATOM | 941 | N    | TYR | A | 67 | -10.268 | -9.366  | 5.791 | 1.00 | 72.40 |
| ATOM | 942 | CA   | TYR | A | 67 | -10.253 | -10.401 | 4.764 | 1.00 | 64.30 |
| ATOM | 943 | C    | TYR | A | 67 | -11.282 | -11.486 | 5.068 | 1.00 | 43.13 |
| ATOM | 944 | O    | TYR | A | 67 | -11.103 | -12.287 | 5.985 | 1.00 | 31.30 |
| ATOM | 945 | CB   | TYR | A | 67 | -8.859  | -11.021 | 4.656 | 1.00 | 25.42 |
| ATOM | 946 | CG   | TYR | A | 67 | -7.817  | -10.077 | 4.098 | 1.00 | 35.41 |
| ATOM | 947 | CD1  | TYR | A | 67 | -7.425  | -8.948  | 4.806 | 1.00 | 23.22 |
| ATOM | 948 | CD2  | TYR | A | 67 | -7.227  | -10.314 | 2.863 | 1.00 | 55.13 |
| ATOM | 949 | CE1  | TYR | A | 67 | -6.474  | -8.082  | 4.300 | 1.00 | 34.52 |
| ATOM | 950 | CE2  | TYR | A | 67 | -6.275  | -9.455  | 2.350 | 1.00 | 54.54 |
| ATOM | 951 | CZ   | TYR | A | 67 | -5.902  | -8.340  | 3.072 | 1.00 | 74.22 |
| ATOM | 952 | OH   | TYR | A | 67 | -4.955  | -7.481  | 2.563 | 1.00 | 14.15 |
| ATOM | 953 | H    | TYR | A | 67 | -9.896  | -9.566  | 6.675 | 1.00 | 13.34 |
| ATOM | 954 | HA   | TYR | A | 67 | -10.503 | -9.937  | 3.821 | 1.00 | 32.04 |
| ATOM | 955 | 2HB  | TYR | A | 67 | -8.533  | -11.331 | 5.637 | 1.00 | 3.22  |
| ATOM | 956 | 3HB  | TYR | A | 67 | -8.905  | -11.885 | 4.009 | 1.00 | 51.34 |
| ATOM | 957 | HD1  | TYR | A | 67 | -7.874  | -8.749  | 5.768 | 1.00 | 35.02 |
| ATOM | 958 | HD2  | TYR | A | 67 | -7.522  | -11.188 | 2.299 | 1.00 | 13.54 |
| ATOM | 959 | HE1  | TYR | A | 67 | -6.182  | -7.210  | 4.865 | 1.00 | 3.24  |
| ATOM | 960 | HE2  | TYR | A | 67 | -5.828  | -9.656  | 1.388 | 1.00 | 42.24 |
| ATOM | 961 | HH   | TYR | A | 67 | -4.262  | -7.987  | 2.134 | 1.00 | 60.22 |
| ATOM | 962 | N    | ARG | A | 68 | -12.359 | -11.504 | 4.290 | 1.00 | 33.31 |
| ATOM | 963 | CA   | ARG | A | 68 | -13.418 | -12.489 | 4.475 | 1.00 | 32.20 |
| ATOM | 964 | C    | ARG | A | 68 | -13.008 | -13.843 | 3.903 | 1.00 | 43.24 |
| ATOM | 965 | O    | ARG | A | 68 | -13.667 | -14.377 | 3.010 | 1.00 | 71.31 |
| ATOM | 966 | CB   | ARG | A | 68 | -14.710 | -12.012 | 3.808 | 1.00 | 22.14 |
| ATOM | 967 | CG   | ARG | A | 68 | -15.242 | -10.707 | 4.377 | 1.00 | 53.12 |
| ATOM | 968 | CD   | ARG | A | 68 | -16.762 | -10.706 | 4.442 | 1.00 | 64.41 |
| ATOM | 969 | NE   | ARG | A | 68 | -17.340 | -9.571  | 3.728 | 1.00 | 63.44 |
| ATOM | 970 | CZ   | ARG | A | 68 | -17.405 | -8.343  | 4.230 | 1.00 | 75.33 |
| ATOM | 971 | NH1  | ARG | A | 68 | -16.931 | -8.093  | 5.442 | 1.00 | 1.02  |
| ATOM | 972 | NH2  | ARG | A | 68 | -17.946 | -7.362  | 3.518 | 1.00 | 33.43 |
| ATOM | 973 | H    | ARG | A | 68 | -12.445 | -10.839 | 3.575 | 1.00 | 22.32 |
| ATOM | 974 | HA   | ARG | A | 68 | -13.590 | -12.597 | 5.536 | 1.00 | 65.25 |
| ATOM | 975 | 2HB  | ARG | A | 68 | -14.526 | -11.871 | 2.753 | 1.00 | 31.14 |
| ATOM | 976 | 3HB  | ARG | A | 68 | -15.467 | -12.771 | 3.935 | 1.00 | 14.44 |
| ATOM | 977 | 2HG  | ARG | A | 68 | -14.850 | -10.573 | 5.374 | 1.00 | 14.22 |
| ATOM | 978 | 3HG  | ARG | A | 68 | -14.917 | -9.892  | 3.747 | 1.00 | 31.04 |
| ATOM | 979 | 2HD  | ARG | A | 68 | -17.128 | -11.621 | 4.001 | 1.00 | 61.33 |
| ATOM | 980 | 3HD  | ARG | A | 68 | -17.064 | -10.660 | 5.477 | 1.00 | 21.35 |
| ATOM | 981 | HE   | ARG | A | 68 | -17.696 | -9.734  | 2.830 | 1.00 | 74.01 |
| ATOM | 982 | 1HH1 | ARG | A | 68 | -16.522 | -8.830  | 5.980 | 1.00 | 0.10  |
| ATOM | 983 | 2HH1 | ARG | A | 68 | -16.981 | -7.167  | 5.817 | 1.00 | 24.14 |
| ATOM | 984 | 1HH2 | ARG | A | 68 | -18.305 | -7.547  | 2.604 | 1.00 | 61.32 |
| ATOM | 985 | 2HH2 | ARG | A | 68 | -17.995 | -6.439  | 3.897 | 1.00 | 54.20 |
| ATOM | 986 | N    | LEU | A | 69 | -11.915 | -14.392 | 4.421 | 1.00 | 1.24  |
| ATOM | 987 | CA   | LEU | A | 69 | -11.415 | -15.683 | 3.962 | 1.00 | 35.20 |
| ATOM | 988 | C    | LEU | A | 69 | -11.986 | -16.819 | 4.805 | 1.00 | 1.14  |
| ATOM | 989 | O    | LEU | A | 69 | -12.565 | -16.588 | 5.867 | 1.00 | 32.45 |
| ATOM | 990 | CB   | LEU | A | 69 | -9.887  | -15.710 | 4.017 | 1.00 | 50.11 |
| ATOM | 991 | CG   | LEU | A | 69 | -9.163  | -14.882 | 2.955 | 1.00 | 63.25 |
| ATOM | 992 | CD1  | LEU | A | 69 | -7.917  | -14.235 | 3.540 | 1.00 | 70.23 |
| ATOM | 993 | CD2  | LEU | A | 69 | -8.803  | -15.749 | 1.757 | 1.00 | 71.13 |
| ATOM | 994 | H    | LEU | A | 69 | -11.432 | -13.919 | 5.130 | 1.00 | 1.51  |



|      |      |      |     |   |    |         |         |        |      |       |
|------|------|------|-----|---|----|---------|---------|--------|------|-------|
| ATOM | 995  | HA   | LEU | A | 69 | -11.733 | -15.816 | 2.939  | 1.00 | 73.24 |
| ATOM | 996  | 2HB  | LEU | A | 69 | -9.585  | -15.342 | 4.985  | 1.00 | 24.02 |
| ATOM | 997  | 3HB  | LEU | A | 69 | -9.571  | -16.738 | 3.909  | 1.00 | 0.23  |
| ATOM | 998  | HG   | LEU | A | 69 | -9.819  | -14.093 | 2.613  | 1.00 | 63.42 |
| ATOM | 999  | 1HD1 | LEU | A | 69 | -7.773  | -13.263 | 3.094  | 1.00 | 54.41 |
| ATOM | 1000 | 2HD1 | LEU | A | 69 | -7.058  | -14.856 | 3.333  | 1.00 | 30.32 |
| ATOM | 1001 | 3HD1 | LEU | A | 69 | -8.035  | -14.128 | 4.608  | 1.00 | 30.52 |
| ATOM | 1002 | 1HD2 | LEU | A | 69 | -8.500  | -15.118 | 0.934  | 1.00 | 15.02 |
| ATOM | 1003 | 2HD2 | LEU | A | 69 | -9.664  | -16.333 | 1.464  | 1.00 | 24.51 |
| ATOM | 1004 | 3HD2 | LEU | A | 69 | -7.991  | -16.410 | 2.021  | 1.00 | 34.15 |
| ATOM | 1005 | N    | THR | A | 70 | -11.816 | -18.048 | 4.327  | 1.00 | 54.43 |
| ATOM | 1006 | CA   | THR | A | 70 | -12.313 | -19.220 | 5.036  | 1.00 | 0.34  |
| ATOM | 1007 | C    | THR | A | 70 | -11.164 | -20.096 | 5.523  | 1.00 | 51.51 |
| ATOM | 1008 | O    | THR | A | 70 | -10.153 | -20.249 | 4.836  | 1.00 | 20.02 |
| ATOM | 1009 | CB   | THR | A | 70 | -13.245 | -20.063 | 4.146  | 1.00 | 42.23 |
| ATOM | 1010 | CG2  | THR | A | 70 | -14.390 | -20.645 | 4.960  | 1.00 | 74.24 |
| ATOM | 1011 | OG1  | THR | A | 70 | -13.768 | -19.257 | 3.084  | 1.00 | 74.42 |
| ATOM | 1012 | H    | THR | A | 70 | -11.347 | -18.167 | 3.475  | 1.00 | 5.11  |
| ATOM | 1013 | HA   | THR | A | 70 | -12.879 | -18.877 | 5.891  | 1.00 | 63.32 |
| ATOM | 1014 | HB   | THR | A | 70 | -12.674 | -20.877 | 3.722  | 1.00 | 4.41  |
| ATOM | 1015 | HG1  | THR | A | 70 | -13.382 | -19.537 | 2.250  | 1.00 | 55.40 |
| ATOM | 1016 | 1HG2 | THR | A | 70 | -15.149 | -19.890 | 5.105  | 1.00 | 72.45 |
| ATOM | 1017 | 2HG2 | THR | A | 70 | -14.020 | -20.973 | 5.920  | 1.00 | 41.44 |
| ATOM | 1018 | 3HG2 | THR | A | 70 | -14.815 | -21.486 | 4.432  | 1.00 | 55.51 |
| ATOM | 1019 | N    | LEU | A | 71 | -11.325 | -20.669 | 6.710  | 1.00 | 13.12 |
| ATOM | 1020 | CA   | LEU | A | 71 | -10.301 | -21.531 | 7.289  | 1.00 | 62.42 |
| ATOM | 1021 | C    | LEU | A | 71 | -10.052 | -22.750 | 6.405  | 1.00 | 1.52  |
| ATOM | 1022 | O    | LEU | A | 71 | -8.912  | -23.183 | 6.236  | 1.00 | 33.50 |
| ATOM | 1023 | CB   | LEU | A | 71 | -10.716 | -21.980 | 8.691  | 1.00 | 74.42 |
| ATOM | 1024 | CG   | LEU | A | 71 | -9.981  | -23.199 | 9.251  | 1.00 | 54.31 |
| ATOM | 1025 | CD1  | LEU | A | 71 | -8.496  | -22.905 | 9.397  | 1.00 | 33.41 |
| ATOM | 1026 | CD2  | LEU | A | 71 | -10.579 | -23.614 | 10.587 | 1.00 | 21.32 |
| ATOM | 1027 | H    | LEU | A | 71 | -12.152 | -20.509 | 7.210  | 1.00 | 33.35 |
| ATOM | 1028 | HA   | LEU | A | 71 | -9.387  | -20.960 | 7.359  | 1.00 | 54.33 |
| ATOM | 1029 | 2HB  | LEU | A | 71 | -10.549 | -21.155 | 9.365  | 1.00 | 14.24 |
| ATOM | 1030 | 3HB  | LEU | A | 71 | -11.772 | -22.213 | 8.663  | 1.00 | 4.04  |
| ATOM | 1031 | HG   | LEU | A | 71 | -10.091 | -24.025 | 8.563  | 1.00 | 75.54 |
| ATOM | 1032 | 1HD1 | LEU | A | 71 | -7.949  | -23.424 | 8.625  | 1.00 | 72.41 |
| ATOM | 1033 | 2HD1 | LEU | A | 71 | -8.157  | -23.240 | 10.366 | 1.00 | 30.41 |
| ATOM | 1034 | 3HD1 | LEU | A | 71 | -8.329  | -21.842 | 9.305  | 1.00 | 22.14 |
| ATOM | 1035 | 1HD2 | LEU | A | 71 | -9.790  | -23.719 | 11.317 | 1.00 | 64.21 |
| ATOM | 1036 | 2HD2 | LEU | A | 71 | -11.092 | -24.558 | 10.474 | 1.00 | 70.40 |
| ATOM | 1037 | 3HD2 | LEU | A | 71 | -11.278 | -22.861 | 10.919 | 1.00 | 72.24 |
| ATOM | 1038 | N    | ARG | A | 72 | -11.125 | -23.295 | 5.843  | 1.00 | 71.24 |
| ATOM | 1039 | CA   | ARG | A | 72 | -11.023 | -24.463 | 4.975  | 1.00 | 0.43  |
| ATOM | 1040 | C    | ARG | A | 72 | -10.199 | -24.145 | 3.731  | 1.00 | 54.13 |
| ATOM | 1041 | O    | ARG | A | 72 | -9.379  | -24.952 | 3.295  | 1.00 | 33.32 |
| ATOM | 1042 | CB   | ARG | A | 72 | -12.416 | -24.946 | 4.568  | 1.00 | 13.43 |
| ATOM | 1043 | CG   | ARG | A | 72 | -12.826 | -26.250 | 5.231  | 1.00 | 33.52 |
| ATOM | 1044 | CD   | ARG | A | 72 | -14.250 | -26.639 | 4.864  | 1.00 | 40.32 |
| ATOM | 1045 | NE   | ARG | A | 72 | -14.296 | -27.865 | 4.072  | 1.00 | 21.13 |
| ATOM | 1046 | CZ   | ARG | A | 72 | -14.028 | -29.069 | 4.566  | 1.00 | 42.10 |
| ATOM | 1047 | NH1  | ARG | A | 72 | -13.697 | -29.207 | 5.842  | 1.00 | 3.14  |
| ATOM | 1048 | NH2  | ARG | A | 72 | -14.091 | -30.138 | 3.782  | 1.00 | 10.23 |
| ATOM | 1049 | H    | ARG | A | 72 | -12.007 | -22.904 | 6.015  | 1.00 | 20.04 |
| ATOM | 1050 | HA   | ARG | A | 72 | -10.528 | -25.246 | 5.530  | 1.00 | 40.32 |
| ATOM | 1051 | 2HB  | ARG | A | 72 | -13.139 | -24.189 | 4.836  | 1.00 | 74.03 |
| ATOM | 1052 | 3HB  | ARG | A | 72 | -12.436 | -25.089 | 3.499  | 1.00 | 40.25 |
| ATOM | 1053 | 2HG  | ARG | A | 72 | -12.157 | -27.034 | 4.908  | 1.00 | 43.22 |

|      |      |      |     |   |    |         |         |        |      |       |
|------|------|------|-----|---|----|---------|---------|--------|------|-------|
| ATOM | 1054 | 3HG  | ARG | A | 72 | -12.759 | -26.136 | 6.303  | 1.00 | 45.33 |
| ATOM | 1055 | 2HD  | ARG | A | 72 | -14.814 | -26.787 | 5.772  | 1.00 | 14.33 |
| ATOM | 1056 | 3HD  | ARG | A | 72 | -14.692 | -25.836 | 4.293  | 1.00 | 45.32 |
| ATOM | 1057 | HE   | ARG | A | 72 | -14.538 | -27.786 | 3.127  | 1.00 | 74.15 |
| ATOM | 1058 | 1HH1 | ARG | A | 72 | -13.649 | -28.403 | 6.435  | 1.00 | 33.34 |
| ATOM | 1059 | 2HH1 | ARG | A | 72 | -13.496 | -30.115 | 6.212  | 1.00 | 55.41 |
| ATOM | 1060 | 1HH2 | ARG | A | 72 | -14.340 | -30.038 | 2.820  | 1.00 | 55.33 |
| ATOM | 1061 | 2HH2 | ARG | A | 72 | -13.889 | -31.043 | 4.155  | 1.00 | 61.04 |
| ATOM | 1062 | N    | GLU | A | 73 | -10.425 | -22.964 | 3.164  | 1.00 | 41.24 |
| ATOM | 1063 | CA   | GLU | A | 73 | -9.704  | -22.541 | 1.969  | 1.00 | 54.15 |
| ATOM | 1064 | C    | GLU | A | 73 | -8.200  | -22.725 | 2.147  | 1.00 | 50.33 |
| ATOM | 1065 | O    | GLU | A | 73 | -7.549  | -23.411 | 1.357  | 1.00 | 10.35 |
| ATOM | 1066 | CB   | GLU | A | 73 | -10.016 | -21.077 | 1.649  | 1.00 | 32.41 |
| ATOM | 1067 | CG   | GLU | A | 73 | -11.164 | -20.899 | 0.670  | 1.00 | 72.43 |
| ATOM | 1068 | CD   | GLU | A | 73 | -10.950 | -21.659 | -0.625 | 1.00 | 22.42 |
| ATOM | 1069 | OE1  | GLU | A | 73 | -10.002 | -21.317 | -1.363 | 1.00 | 32.21 |
| ATOM | 1070 | OE2  | GLU | A | 73 | -11.729 | -22.595 | -0.900 | 1.00 | 31.41 |
| ATOM | 1071 | H    | GLU | A | 73 | -11.092 | -22.363 | 3.558  | 1.00 | 64.43 |
| ATOM | 1072 | HA   | GLU | A | 73 | -10.035 | -23.157 | 1.146  | 1.00 | 32.34 |
| ATOM | 1073 | 2HB  | GLU | A | 73 | -10.270 | -20.567 | 2.567  | 1.00 | 70.33 |
| ATOM | 1074 | 3HB  | GLU | A | 73 | -9.135  | -20.619 | 1.225  | 1.00 | 10.12 |
| ATOM | 1075 | 2HG  | GLU | A | 73 | -12.073 | -21.255 | 1.132  | 1.00 | 70.05 |
| ATOM | 1076 | 3HG  | GLU | A | 73 | -11.266 | -19.849 | 0.441  | 1.00 | 44.33 |
| ATOM | 1077 | N    | LEU | A | 74 | -7.654  | -22.107 | 3.188  | 1.00 | 1.21  |
| ATOM | 1078 | CA   | LEU | A | 74 | -6.226  | -22.201 | 3.471  | 1.00 | 1.20  |
| ATOM | 1079 | C    | LEU | A | 74 | -5.820  | -23.644 | 3.751  | 1.00 | 71.33 |
| ATOM | 1080 | O    | LEU | A | 74 | -4.709  | -24.062 | 3.423  | 1.00 | 31.14 |
| ATOM | 1081 | CB   | LEU | A | 74 | -5.863  | -21.317 | 4.665  | 1.00 | 12.53 |
| ATOM | 1082 | CG   | LEU | A | 74 | -5.938  | -19.807 | 4.430  | 1.00 | 23.53 |
| ATOM | 1083 | CD1  | LEU | A | 74 | -7.374  | -19.321 | 4.539  | 1.00 | 14.42 |
| ATOM | 1084 | CD2  | LEU | A | 74 | -5.046  | -19.069 | 5.418  | 1.00 | 32.22 |
| ATOM | 1085 | H    | LEU | A | 74 | -8.223  | -21.575 | 3.781  | 1.00 | 14.45 |
| ATOM | 1086 | HA   | LEU | A | 74 | -5.692  | -21.852 | 2.600  | 1.00 | 41.23 |
| ATOM | 1087 | 2HB  | LEU | A | 74 | -6.537  | -21.559 | 5.473  | 1.00 | 41.13 |
| ATOM | 1088 | 3HB  | LEU | A | 74 | -4.851  | -21.557 | 4.959  | 1.00 | 72.23 |
| ATOM | 1089 | HG   | LEU | A | 74 | -5.586  | -19.587 | 3.432  | 1.00 | 71.23 |
| ATOM | 1090 | 1HD1 | LEU | A | 74 | -7.382  | -18.297 | 4.880  | 1.00 | 15.42 |
| ATOM | 1091 | 2HD1 | LEU | A | 74 | -7.912  | -19.939 | 5.243  | 1.00 | 5.11  |
| ATOM | 1092 | 3HD1 | LEU | A | 74 | -7.850  | -19.382 | 3.571  | 1.00 | 65.31 |
| ATOM | 1093 | 1HD2 | LEU | A | 74 | -4.281  | -18.530 | 4.879  | 1.00 | 73.33 |
| ATOM | 1094 | 2HD2 | LEU | A | 74 | -4.582  | -19.781 | 6.086  | 1.00 | 51.14 |
| ATOM | 1095 | 3HD2 | LEU | A | 74 | -5.642  | -18.374 | 5.990  | 1.00 | 2.42  |
| ATOM | 1096 | N    | TYR | A | 75 | -6.728  | -24.402 | 4.356  | 1.00 | 51.13 |
| ATOM | 1097 | CA   | TYR | A | 75 | -6.465  | -25.799 | 4.680  | 1.00 | 42.14 |
| ATOM | 1098 | C    | TYR | A | 75 | -6.257  | -26.622 | 3.412  | 1.00 | 22.10 |
| ATOM | 1099 | O    | TYR | A | 75 | -5.441  | -27.543 | 3.384  | 1.00 | 72.14 |
| ATOM | 1100 | CB   | TYR | A | 75 | -7.620  | -26.382 | 5.496  | 1.00 | 40.54 |
| ATOM | 1101 | CG   | TYR | A | 75 | -7.307  | -26.530 | 6.967  | 1.00 | 32.14 |
| ATOM | 1102 | CD1  | TYR | A | 75 | -6.151  | -27.174 | 7.390  | 1.00 | 22.31 |
| ATOM | 1103 | CD2  | TYR | A | 75 | -8.168  | -26.027 | 7.935  | 1.00 | 20.51 |
| ATOM | 1104 | CE1  | TYR | A | 75 | -5.861  | -27.313 | 8.734  | 1.00 | 70.22 |
| ATOM | 1105 | CE2  | TYR | A | 75 | -7.886  | -26.160 | 9.281  | 1.00 | 64.42 |
| ATOM | 1106 | CZ   | TYR | A | 75 | -6.731  | -26.804 | 9.675  | 1.00 | 32.11 |
| ATOM | 1107 | OH   | TYR | A | 75 | -6.447  | -26.940 | 11.015 | 1.00 | 40.23 |
| ATOM | 1108 | H    | TYR | A | 75 | -7.596  | -24.012 | 4.592  | 1.00 | 64.22 |
| ATOM | 1109 | HA   | TYR | A | 75 | -5.563  | -25.838 | 5.273  | 1.00 | 42.35 |
| ATOM | 1110 | 2HB  | TYR | A | 75 | -8.479  | -25.735 | 5.403  | 1.00 | 1.15  |
| ATOM | 1111 | 3HB  | TYR | A | 75 | -7.868  | -27.359 | 5.108  | 1.00 | 11.05 |
| ATOM | 1112 | HD1  | TYR | A | 75 | -5.471  | -27.572 | 6.650  | 1.00 | 11.04 |

|      |      |      |     |   |    |        |         |        |      |       |
|------|------|------|-----|---|----|--------|---------|--------|------|-------|
| ATOM | 1113 | HD2  | TYR | A | 75 | -9.072 | -25.524 | 7.623  | 1.00 | 64.22 |
| ATOM | 1114 | HE1  | TYR | A | 75 | -4.957 | -27.817 | 9.043  | 1.00 | 11.11 |
| ATOM | 1115 | HE2  | TYR | A | 75 | -8.567 | -25.762 | 10.018 | 1.00 | 30.31 |
| ATOM | 1116 | HH   | TYR | A | 75 | -6.174 | -26.091 | 11.371 | 1.00 | 24.32 |
| ATOM | 1117 | N    | ALA | A | 76 | -7.001 | -26.282 | 2.365  | 1.00 | 41.03 |
| ATOM | 1118 | CA   | ALA | A | 76 | -6.897 | -26.987 | 1.093  | 1.00 | 54.51 |
| ATOM | 1119 | C    | ALA | A | 76 | -5.579 | -26.670 | 0.396  | 1.00 | 44.12 |
| ATOM | 1120 | O    | ALA | A | 76 | -4.879 | -27.570 | -0.067 | 1.00 | 63.01 |
| ATOM | 1121 | CB   | ALA | A | 76 | -8.071 | -26.628 | 0.194  | 1.00 | 73.02 |
| ATOM | 1122 | H    | ALA | A | 76 | -7.634 | -25.539 | 2.449  | 1.00 | 4.42  |
| ATOM | 1123 | HA   | ALA | A | 76 | -6.941 | -28.047 | 1.294  | 1.00 | 22.35 |
| ATOM | 1124 | 1HB  | ALA | A | 76 | -7.776 | -25.842 | -0.486 | 1.00 | 1.22  |
| ATOM | 1125 | 2HB  | ALA | A | 76 | -8.371 | -27.498 | -0.370 | 1.00 | 73.43 |
| ATOM | 1126 | 3HB  | ALA | A | 76 | -8.898 | -26.289 | 0.800  | 1.00 | 41.41 |
| ATOM | 1127 | N    | ALA | A | 77 | -5.246 | -25.385 | 0.324  | 1.00 | 71.21 |
| ATOM | 1128 | CA   | ALA | A | 77 | -4.011 | -24.950 | -0.316 | 1.00 | 23.52 |
| ATOM | 1129 | C    | ALA | A | 77 | -3.173 | -24.097 | 0.631  | 1.00 | 53.14 |
| ATOM | 1130 | O    | ALA | A | 77 | -3.009 | -22.892 | 0.438  | 1.00 | 72.13 |
| ATOM | 1131 | CB   | ALA | A | 77 | -4.319 | -24.180 | -1.591 | 1.00 | 73.10 |
| ATOM | 1132 | H    | ALA | A | 77 | -5.845 | -24.714 | 0.712  | 1.00 | 74.13 |
| ATOM | 1133 | HA   | ALA | A | 77 | -3.446 | -25.832 | -0.585 | 1.00 | 1.35  |
| ATOM | 1134 | 1HB  | ALA | A | 77 | -3.395 | -23.912 | -2.081 | 1.00 | 64.13 |
| ATOM | 1135 | 2HB  | ALA | A | 77 | -4.911 | -24.798 | -2.250 | 1.00 | 40.31 |
| ATOM | 1136 | 3HB  | ALA | A | 77 | -4.870 | -23.284 | -1.346 | 1.00 | 22.34 |
| ATOM | 1137 | N    | PRO | A | 78 | -2.631 | -24.733 | 1.679  | 1.00 | 24.32 |
| ATOM | 1138 | CA   | PRO | A | 78 | -1.801 | -24.051 | 2.677  | 1.00 | 51.23 |
| ATOM | 1139 | C    | PRO | A | 78 | -0.451 | -23.623 | 2.113  | 1.00 | 44.23 |
| ATOM | 1140 | O    | PRO | A | 78 | 0.535  | -24.354 | 2.211  | 1.00 | 65.02 |
| ATOM | 1141 | CB   | PRO | A | 78 | -1.614 | -25.109 | 3.767  | 1.00 | 72.23 |
| ATOM | 1142 | CG   | PRO | A | 78 | -1.778 | -26.412 | 3.062  | 1.00 | 14.52 |
| ATOM | 1143 | CD   | PRO | A | 78 | -2.784 | -26.168 | 1.971  | 1.00 | 35.45 |
| ATOM | 1144 | HA   | PRO | A | 78 | -2.306 | -23.190 | 3.091  | 1.00 | 70.42 |
| ATOM | 1145 | 2HB  | PRO | A | 78 | -0.628 | -25.014 | 4.199  | 1.00 | 62.33 |
| ATOM | 1146 | 3HB  | PRO | A | 78 | -2.363 | -24.978 | 4.533  | 1.00 | 11.01 |
| ATOM | 1147 | 2HG  | PRO | A | 78 | -0.835 | -26.722 | 2.640  | 1.00 | 60.11 |
| ATOM | 1148 | 3HG  | PRO | A | 78 | -2.146 | -27.157 | 3.751  | 1.00 | 34.34 |
| ATOM | 1149 | 2HD  | PRO | A | 78 | -2.551 | -26.766 | 1.103  | 1.00 | 72.02 |
| ATOM | 1150 | 3HD  | PRO | A | 78 | -3.782 | -26.385 | 2.324  | 1.00 | 54.55 |
| ATOM | 1151 | N    | THR | A | 79 | -0.412 | -22.433 | 1.521  | 1.00 | 4.44  |
| ATOM | 1152 | CA   | THR | A | 79 | 0.818  | -21.907 | 0.941  | 1.00 | 32.41 |
| ATOM | 1153 | C    | THR | A | 79 | 0.810  | -20.383 | 0.923  | 1.00 | 30.21 |
| ATOM | 1154 | O    | THR | A | 79 | -0.171 | -19.762 | 0.512  | 1.00 | 40.10 |
| ATOM | 1155 | CB   | THR | A | 79 | 1.027  | -22.425 | -0.494 | 1.00 | 64.44 |
| ATOM | 1156 | CG2  | THR | A | 79 | 1.390  | -23.903 | -0.489 | 1.00 | 5.30  |
| ATOM | 1157 | OG1  | THR | A | 79 | -0.162 | -22.224 | -1.266 | 1.00 | 43.04 |
| ATOM | 1158 | H    | THR | A | 79 | -1.230 | -21.896 | 1.475  | 1.00 | 74.44 |
| ATOM | 1159 | HA   | THR | A | 79 | 1.645  | -22.247 | 1.548  | 1.00 | 13.41 |
| ATOM | 1160 | HB   | THR | A | 79 | 1.839  | -21.872 | -0.946 | 1.00 | 34.14 |
| ATOM | 1161 | HG1  | THR | A | 79 | -0.055 | -22.629 | -2.130 | 1.00 | 62.25 |
| ATOM | 1162 | 1HG2 | THR | A | 79 | 1.944  | -24.134 | 0.409  | 1.00 | 30.20 |
| ATOM | 1163 | 2HG2 | THR | A | 79 | 1.997  | -24.127 | -1.354 | 1.00 | 33.41 |
| ATOM | 1164 | 3HG2 | THR | A | 79 | 0.488  | -24.495 | -0.518 | 1.00 | 2.32  |
| ATOM | 1165 | N    | LEU | A | 80 | 1.909  | -19.785 | 1.370  | 1.00 | 32.42 |
| ATOM | 1166 | CA   | LEU | A | 80 | 2.029  | -18.332 | 1.405  | 1.00 | 50.13 |
| ATOM | 1167 | C    | LEU | A | 80 | 1.805  | -17.734 | 0.020  | 1.00 | 53.04 |
| ATOM | 1168 | O    | LEU | A | 80 | 1.275  | -16.631 | -0.113 | 1.00 | 34.31 |
| ATOM | 1169 | CB   | LEU | A | 80 | 3.407  | -17.927 | 1.931  | 1.00 | 41.23 |
| ATOM | 1170 | CG   | LEU | A | 80 | 3.432  | -17.268 | 3.310  | 1.00 | 31.35 |
| ATOM | 1171 | CD1  | LEU | A | 80 | 4.840  | -17.283 | 3.884  | 1.00 | 64.42 |

|      |      |      |     |   |    |        |         |        |      |       |
|------|------|------|-----|---|----|--------|---------|--------|------|-------|
| ATOM | 1172 | CD2  | LEU | A | 80 | 2.902  | -15.844 | 3.231  | 1.00 | 35.25 |
| ATOM | 1173 | H    | LEU | A | 80 | 2.657  | -20.333 | 1.685  | 1.00 | 65.23 |
| ATOM | 1174 | HA   | LEU | A | 80 | 1.271  | -17.953 | 2.074  | 1.00 | 3.23  |
| ATOM | 1175 | 2HB  | LEU | A | 80 | 4.017  | -18.816 | 1.978  | 1.00 | 43.54 |
| ATOM | 1176 | 3HB  | LEU | A | 80 | 3.839  | -17.233 | 1.224  | 1.00 | 51.43 |
| ATOM | 1177 | HG   | LEU | A | 80 | 2.793  | -17.827 | 3.981  | 1.00 | 64.33 |
| ATOM | 1178 | 1HD1 | LEU | A | 80 | 5.548  | -17.038 | 3.107  | 1.00 | 50.53 |
| ATOM | 1179 | 2HD1 | LEU | A | 80 | 5.060  | -18.267 | 4.273  | 1.00 | 41.40 |
| ATOM | 1180 | 3HD1 | LEU | A | 80 | 4.912  | -16.557 | 4.680  | 1.00 | 25.23 |
| ATOM | 1181 | 1HD2 | LEU | A | 80 | 3.168  | -15.311 | 4.132  | 1.00 | 41.10 |
| ATOM | 1182 | 2HD2 | LEU | A | 80 | 1.826  | -15.866 | 3.131  | 1.00 | 11.22 |
| ATOM | 1183 | 3HD2 | LEU | A | 80 | 3.334  | -15.346 | 2.376  | 1.00 | 35.24 |
| ATOM | 1184 | N    | ALA | A | 81 | 2.210  | -18.470 | -1.010 | 1.00 | 22.31 |
| ATOM | 1185 | CA   | ALA | A | 81 | 2.050  | -18.015 | -2.385 | 1.00 | 53.31 |
| ATOM | 1186 | C    | ALA | A | 81 | 0.578  | -17.976 | -2.782 | 1.00 | 70.14 |
| ATOM | 1187 | O    | ALA | A | 81 | 0.058  | -16.931 | -3.172 | 1.00 | 33.13 |
| ATOM | 1188 | CB   | ALA | A | 81 | 2.831  | -18.913 | -3.333 | 1.00 | 51.41 |
| ATOM | 1189 | H    | ALA | A | 81 | 2.626  | -19.341 | -0.840 | 1.00 | 71.12 |
| ATOM | 1190 | HA   | ALA | A | 81 | 2.458  | -17.017 | -2.456 | 1.00 | 14.41 |
| ATOM | 1191 | 1HB  | ALA | A | 81 | 2.277  | -19.031 | -4.253 | 1.00 | 63.23 |
| ATOM | 1192 | 2HB  | ALA | A | 81 | 3.790  | -18.464 | -3.545 | 1.00 | 21.33 |
| ATOM | 1193 | 3HB  | ALA | A | 81 | 2.978  | -19.879 | -2.874 | 1.00 | 51.31 |
| ATOM | 1194 | N    | ALA | A | 82 | -0.087 | -19.122 | -2.682 | 1.00 | 75.21 |
| ATOM | 1195 | CA   | ALA | A | 82 | -1.500 | -19.218 | -3.030 | 1.00 | 23.42 |
| ATOM | 1196 | C    | ALA | A | 82 | -2.340 | -18.273 | -2.178 | 1.00 | 75.41 |
| ATOM | 1197 | O    | ALA | A | 82 | -3.229 | -17.589 | -2.686 | 1.00 | 62.44 |
| ATOM | 1198 | CB   | ALA | A | 82 | -1.986 | -20.651 | -2.869 | 1.00 | 74.11 |
| ATOM | 1199 | H    | ALA | A | 82 | 0.382  | -19.921 | -2.365 | 1.00 | 63.43 |
| ATOM | 1200 | HA   | ALA | A | 82 | -1.607 | -18.942 | -4.069 | 1.00 | 72.20 |
| ATOM | 1201 | 1HB  | ALA | A | 82 | -2.996 | -20.732 | -3.246 | 1.00 | 44.21 |
| ATOM | 1202 | 2HB  | ALA | A | 82 | -1.340 | -21.315 | -3.424 | 1.00 | 11.14 |
| ATOM | 1203 | 3HB  | ALA | A | 82 | -1.970 | -20.921 | -1.824 | 1.00 | 24.41 |
| ATOM | 1204 | N    | TRP | A | 83 | -2.055 | -18.241 | -0.882 | 1.00 | 21.24 |
| ATOM | 1205 | CA   | TRP | A | 83 | -2.786 | -17.380 | 0.041  | 1.00 | 53.23 |
| ATOM | 1206 | C    | TRP | A | 83 | -2.846 | -15.949 | -0.482 | 1.00 | 53.04 |
| ATOM | 1207 | O    | TRP | A | 83 | -3.924 | -15.369 | -0.608 | 1.00 | 30.23 |
| ATOM | 1208 | CB   | TRP | A | 83 | -2.130 | -17.404 | 1.422  | 1.00 | 12.12 |
| ATOM | 1209 | CG   | TRP | A | 83 | -2.418 | -18.655 | 2.195  | 1.00 | 71.52 |
| ATOM | 1210 | CD1  | TRP | A | 83 | -3.049 | -19.776 | 1.734  | 1.00 | 3.05  |
| ATOM | 1211 | CD2  | TRP | A | 83 | -2.088 | -18.912 | 3.564  | 1.00 | 64.50 |
| ATOM | 1212 | CE2  | TRP | A | 83 | -2.547 | -20.209 | 3.867  | 1.00 | 31.11 |
| ATOM | 1213 | CE3  | TRP | A | 83 | -1.447 | -18.175 | 4.563  | 1.00 | 44.43 |
| ATOM | 1214 | NE1  | TRP | A | 83 | -3.130 | -20.714 | 2.735  | 1.00 | 32.21 |
| ATOM | 1215 | CZ2  | TRP | A | 83 | -2.386 | -20.780 | 5.127  | 1.00 | 70.13 |
| ATOM | 1216 | CZ3  | TRP | A | 83 | -1.288 | -18.743 | 5.812  | 1.00 | 2.43  |
| ATOM | 1217 | CH2  | TRP | A | 83 | -1.755 | -20.035 | 6.086  | 1.00 | 70.15 |
| ATOM | 1218 | H    | TRP | A | 83 | -1.335 | -18.810 | -0.536 | 1.00 | 33.02 |
| ATOM | 1219 | HA   | TRP | A | 83 | -3.793 | -17.763 | 0.123  | 1.00 | 24.14 |
| ATOM | 1220 | 2HB  | TRP | A | 83 | -1.060 | -17.322 | 1.307  | 1.00 | 22.01 |
| ATOM | 1221 | 3HB  | TRP | A | 83 | -2.492 | -16.565 | 1.999  | 1.00 | 41.33 |
| ATOM | 1222 | HD1  | TRP | A | 83 | -3.425 | -19.893 | 0.730  | 1.00 | 44.54 |
| ATOM | 1223 | HE1  | TRP | A | 83 | -3.538 | -21.602 | 2.651  | 1.00 | 53.43 |
| ATOM | 1224 | HE3  | TRP | A | 83 | -1.080 | -17.177 | 4.371  | 1.00 | 25.04 |
| ATOM | 1225 | HZ2  | TRP | A | 83 | -2.740 | -21.775 | 5.353  | 1.00 | 70.43 |
| ATOM | 1226 | HZ3  | TRP | A | 83 | -0.795 | -18.187 | 6.597  | 1.00 | 72.10 |
| ATOM | 1227 | HH2  | TRP | A | 83 | -1.609 | -20.439 | 7.076  | 1.00 | 54.44 |
| ATOM | 1228 | N    | ASN | A | 84 | -1.682 | -15.385 | -0.786 | 1.00 | 63.25 |
| ATOM | 1229 | CA   | ASN | A | 84 | -1.603 | -14.021 | -1.296 | 1.00 | 40.01 |
| ATOM | 1230 | C    | ASN | A | 84 | -2.555 | -13.824 | -2.472 | 1.00 | 11.43 |

|      |      |      |     |   |    |        |         |        |      |       |
|------|------|------|-----|---|----|--------|---------|--------|------|-------|
| ATOM | 1231 | O    | ASN | A | 84 | -3.077 | -12.729 | -2.683 | 1.00 | 32.45 |
| ATOM | 1232 | CB   | ASN | A | 84 | -0.171 | -13.697 | -1.725 | 1.00 | 44.33 |
| ATOM | 1233 | CG   | ASN | A | 84 | -0.034 | -12.285 | -2.263 | 1.00 | 61.55 |
| ATOM | 1234 | ND2  | ASN | A | 84 | 0.323  | -12.170 | -3.538 | 1.00 | 34.35 |
| ATOM | 1235 | OD1  | ASN | A | 84 | -0.246 | -11.311 | -1.542 | 1.00 | 55.21 |
| ATOM | 1236 | H    | ASN | A | 84 | -0.856 | -15.898 | -0.665 | 1.00 | 63.31 |
| ATOM | 1237 | HA   | ASN | A | 84 | -1.890 | -13.352 | -0.499 | 1.00 | 35.42 |
| ATOM | 1238 | 2HB  | ASN | A | 84 | 0.486  | -13.802 | -0.874 | 1.00 | 2.40  |
| ATOM | 1239 | 3HB  | ASN | A | 84 | 0.133  | -14.388 | -2.497 | 1.00 | 3.03  |
| ATOM | 1240 | 1HD2 | ASN | A | 84 | 0.475  | -12.991 | -4.052 | 1.00 | 2.41  |
| ATOM | 1241 | 2HD2 | ASN | A | 84 | 0.419  | -11.270 | -3.911 | 1.00 | 50.51 |
| ATOM | 1242 | N    | GLN | A | 85 | -2.776 | -14.891 | -3.233 | 1.00 | 2.41  |
| ATOM | 1243 | CA   | GLN | A | 85 | -3.665 | -14.834 | -4.387 | 1.00 | 60.12 |
| ATOM | 1244 | C    | GLN | A | 85 | -5.107 | -14.598 | -3.952 | 1.00 | 55.11 |
| ATOM | 1245 | O    | GLN | A | 85 | -5.791 | -13.720 | -4.481 | 1.00 | 3.12  |
| ATOM | 1246 | CB   | GLN | A | 85 | -3.569 | -16.129 | -5.195 | 1.00 | 71.42 |
| ATOM | 1247 | CG   | GLN | A | 85 | -4.115 | -16.007 | -6.609 | 1.00 | 2.53  |
| ATOM | 1248 | CD   | GLN | A | 85 | -3.547 | -17.053 | -7.547 | 1.00 | 23.23 |
| ATOM | 1249 | NE2  | GLN | A | 85 | -3.054 | -16.612 | -8.698 | 1.00 | 3.31  |
| ATOM | 1250 | OE1  | GLN | A | 85 | -3.551 | -18.246 | -7.240 | 1.00 | 43.23 |
| ATOM | 1251 | H    | GLN | A | 85 | -2.330 | -15.735 | -3.014 | 1.00 | 12.34 |
| ATOM | 1252 | HA   | GLN | A | 85 | -3.350 | -14.009 | -5.008 | 1.00 | 61.31 |
| ATOM | 1253 | 2HB  | GLN | A | 85 | -2.533 | -16.426 | -5.257 | 1.00 | 4.53  |
| ATOM | 1254 | 3HB  | GLN | A | 85 | -4.126 | -16.901 | -4.684 | 1.00 | 2.33  |
| ATOM | 1255 | 2HG  | GLN | A | 85 | -5.188 | -16.119 | -6.578 | 1.00 | 15.35 |
| ATOM | 1256 | 3HG  | GLN | A | 85 | -3.867 | -15.028 | -6.992 | 1.00 | 54.32 |
| ATOM | 1257 | 1HE2 | GLN | A | 85 | -3.083 | -15.647 | -8.874 | 1.00 | 20.40 |
| ATOM | 1258 | 2HE2 | GLN | A | 85 | -2.679 | -17.266 | -9.323 | 1.00 | 34.14 |
| ATOM | 1259 | N    | LEU | A | 86 | -5.565 | -15.387 | -2.986 | 1.00 | 54.42 |
| ATOM | 1260 | CA   | LEU | A | 86 | -6.928 | -15.264 | -2.480 | 1.00 | 1.35  |
| ATOM | 1261 | C    | LEU | A | 86 | -7.138 | -13.912 | -1.805 | 1.00 | 53.22 |
| ATOM | 1262 | O    | LEU | A | 86 | -8.264 | -13.425 | -1.707 | 1.00 | 51.33 |
| ATOM | 1263 | CB   | LEU | A | 86 | -7.229 | -16.392 | -1.491 | 1.00 | 52.23 |
| ATOM | 1264 | CG   | LEU | A | 86 | -7.203 | -17.810 | -2.063 | 1.00 | 2.21  |
| ATOM | 1265 | CD1  | LEU | A | 86 | -6.198 | -18.670 | -1.311 | 1.00 | 55.43 |
| ATOM | 1266 | CD2  | LEU | A | 86 | -8.590 | -18.434 | -2.006 | 1.00 | 44.52 |
| ATOM | 1267 | H    | LEU | A | 86 | -4.974 | -16.068 | -2.604 | 1.00 | 12.21 |
| ATOM | 1268 | HA   | LEU | A | 86 | -7.602 | -15.342 | -3.319 | 1.00 | 61.35 |
| ATOM | 1269 | 2HB  | LEU | A | 86 | -6.498 | -16.341 | -0.699 | 1.00 | 72.21 |
| ATOM | 1270 | 3HB  | LEU | A | 86 | -8.214 | -16.217 | -1.082 | 1.00 | 30.23 |
| ATOM | 1271 | HG   | LEU | A | 86 | -6.896 | -17.768 | -3.099 | 1.00 | 0.20  |
| ATOM | 1272 | 1HD1 | LEU | A | 86 | -5.957 | -19.540 | -1.902 | 1.00 | 32.43 |
| ATOM | 1273 | 2HD1 | LEU | A | 86 | -6.625 | -18.980 | -0.369 | 1.00 | 23.31 |
| ATOM | 1274 | 3HD1 | LEU | A | 86 | -5.301 | -18.098 | -1.128 | 1.00 | 45.55 |
| ATOM | 1275 | 1HD2 | LEU | A | 86 | -9.331 | -17.654 | -1.913 | 1.00 | 1.33  |
| ATOM | 1276 | 2HD2 | LEU | A | 86 | -8.653 | -19.094 | -1.153 | 1.00 | 44.04 |
| ATOM | 1277 | 3HD2 | LEU | A | 86 | -8.769 | -18.995 | -2.911 | 1.00 | 51.30 |
| ATOM | 1278 | N    | MET | A | 87 | -6.047 | -13.310 | -1.344 | 1.00 | 23.32 |
| ATOM | 1279 | CA   | MET | A | 87 | -6.112 | -12.012 | -0.682 | 1.00 | 22.52 |
| ATOM | 1280 | C    | MET | A | 87 | -6.519 | -10.920 | -1.666 | 1.00 | 23.23 |
| ATOM | 1281 | O    | MET | A | 87 | -7.469 | -10.175 | -1.423 | 1.00 | 51.15 |
| ATOM | 1282 | CB   | MET | A | 87 | -4.761 | -11.669 | -0.051 | 1.00 | 62.50 |
| ATOM | 1283 | CG   | MET | A | 87 | -4.554 | -12.293 | 1.320  | 1.00 | 74.22 |
| ATOM | 1284 | SD   | MET | A | 87 | -2.840 | -12.205 | 1.872  | 1.00 | 72.01 |
| ATOM | 1285 | CE   | MET | A | 87 | -2.805 | -10.572 | 2.606  | 1.00 | 45.40 |
| ATOM | 1286 | H    | MET | A | 87 | -5.177 | -13.748 | -1.451 | 1.00 | 64.44 |
| ATOM | 1287 | HA   | MET | A | 87 | -6.857 | -12.075 | 0.097  | 1.00 | 61.11 |
| ATOM | 1288 | 2HB  | MET | A | 87 | -3.974 | -12.017 | -0.703 | 1.00 | 63.22 |
| ATOM | 1289 | 3HB  | MET | A | 87 | -4.686 | -10.597 | 0.051  | 1.00 | 61.13 |

|      |      |      |     |   |    |         |         |        |      |       |
|------|------|------|-----|---|----|---------|---------|--------|------|-------|
| ATOM | 1290 | 2HG  | MET | A | 87 | -5.174  | -11.773 | 2.035  | 1.00 | 75.23 |
| ATOM | 1291 | 3HG  | MET | A | 87 | -4.852  | -13.330 | 1.276  | 1.00 | 23.51 |
| ATOM | 1292 | 1HE  | MET | A | 87 | -2.103  | -10.561 | 3.427  | 1.00 | 33.12 |
| ATOM | 1293 | 2HE  | MET | A | 87 | -2.500  | -9.850  | 1.863  | 1.00 | 44.12 |
| ATOM | 1294 | 3HE  | MET | A | 87 | -3.790  | -10.320 | 2.971  | 1.00 | 41.44 |
| ATOM | 1295 | N    | LEU | A | 88 | -5.794  | -10.830 | -2.775 | 1.00 | 71.05 |
| ATOM | 1296 | CA   | LEU | A | 88 | -6.080  | -9.828  | -3.796 | 1.00 | 43.15 |
| ATOM | 1297 | C    | LEU | A | 88 | -7.252  | -10.260 | -4.671 | 1.00 | 33.50 |
| ATOM | 1298 | O    | LEU | A | 88 | -7.962  | -9.426  | -5.232 | 1.00 | 11.10 |
| ATOM | 1299 | CB   | LEU | A | 88 | -4.843  | -9.588  | -4.664 | 1.00 | 21.30 |
| ATOM | 1300 | CG   | LEU | A | 88 | -4.962  | -10.001 | -6.131 | 1.00 | 60.44 |
| ATOM | 1301 | CD1  | LEU | A | 88 | -5.679  | -8.926  | -6.932 | 1.00 | 55.12 |
| ATOM | 1302 | CD2  | LEU | A | 88 | -3.587  | -10.279 | -6.721 | 1.00 | 23.25 |
| ATOM | 1303 | H    | LEU | A | 88 | -5.049  | -11.451 | -2.913 | 1.00 | 34.44 |
| ATOM | 1304 | HA   | LEU | A | 88 | -6.341  | -8.908  | -3.294 | 1.00 | 61.41 |
| ATOM | 1305 | 2HB  | LEU | A | 88 | -4.618  | -8.533  | -4.635 | 1.00 | 32.20 |
| ATOM | 1306 | 3HB  | LEU | A | 88 | -4.023  | -10.141 | -4.229 | 1.00 | 24.41 |
| ATOM | 1307 | HG   | LEU | A | 88 | -5.545  | -10.910 | -6.197 | 1.00 | 4.01  |
| ATOM | 1308 | 1HD1 | LEU | A | 88 | -5.698  | -8.007  | -6.366 | 1.00 | 23.33 |
| ATOM | 1309 | 2HD1 | LEU | A | 88 | -6.691  | -9.244  | -7.136 | 1.00 | 14.44 |
| ATOM | 1310 | 3HD1 | LEU | A | 88 | -5.159  | -8.764  | -7.865 | 1.00 | 30.31 |
| ATOM | 1311 | 1HD2 | LEU | A | 88 | -3.359  | -9.534  | -7.468 | 1.00 | 43.03 |
| ATOM | 1312 | 2HD2 | LEU | A | 88 | -3.581  | -11.259 | -7.176 | 1.00 | 35.12 |
| ATOM | 1313 | 3HD2 | LEU | A | 88 | -2.845  | -10.242 | -5.937 | 1.00 | 11.24 |
| ATOM | 1314 | N    | SER | A | 89 | -7.451  | -11.570 | -4.781 | 1.00 | 25.24 |
| ATOM | 1315 | CA   | SER | A | 89 | -8.536  | -12.114 | -5.588 | 1.00 | 13.01 |
| ATOM | 1316 | C    | SER | A | 89 | -9.892  | -11.699 | -5.025 | 1.00 | 33.31 |
| ATOM | 1317 | O    | SER | A | 89 | -10.851 | -11.499 | -5.771 | 1.00 | 11.45 |
| ATOM | 1318 | CB   | SER | A | 89 | -8.441  | -13.640 | -5.647 | 1.00 | 51.24 |
| ATOM | 1319 | OG   | SER | A | 89 | -7.388  | -14.052 | -6.501 | 1.00 | 71.23 |
| ATOM | 1320 | H    | SER | A | 89 | -6.850  | -12.185 | -4.309 | 1.00 | 74.30 |
| ATOM | 1321 | HA   | SER | A | 89 | -8.438  | -11.716 | -6.587 | 1.00 | 64.41 |
| ATOM | 1322 | 2HB  | SER | A | 89 | -8.257  | -14.025 | -4.656 | 1.00 | 64.34 |
| ATOM | 1323 | 3HB  | SER | A | 89 | -9.371  | -14.041 | -6.023 | 1.00 | 34.24 |
| ATOM | 1324 | HG   | SER | A | 89 | -7.708  | -14.100 | -7.405 | 1.00 | 55.20 |
| ATOM | 1325 | N    | ARG | A | 90 | -9.964  | -11.573 | -3.704 | 1.00 | 3.11  |
| ATOM | 1326 | CA   | ARG | A | 90 | -11.202 | -11.183 | -3.040 | 1.00 | 23.45 |
| ATOM | 1327 | C    | ARG | A | 90 | -11.342 | -9.665  | -2.999 | 1.00 | 11.45 |
| ATOM | 1328 | O    | ARG | A | 90 | -12.453 | -9.134  | -3.001 | 1.00 | 3.41  |
| ATOM | 1329 | CB   | ARG | A | 90 | -11.242 | -11.749 | -1.619 | 1.00 | 15.45 |
| ATOM | 1330 | CG   | ARG | A | 90 | -10.215 | -11.128 | -0.686 | 1.00 | 42.15 |
| ATOM | 1331 | CD   | ARG | A | 90 | -10.508 | -11.462 | 0.768  | 1.00 | 53.42 |
| ATOM | 1332 | NE   | ARG | A | 90 | -11.791 | -10.918 | 1.206  | 1.00 | 2.21  |
| ATOM | 1333 | CZ   | ARG | A | 90 | -12.017 | -9.621  | 1.383  | 1.00 | 54.15 |
| ATOM | 1334 | NH1  | ARG | A | 90 | -11.053 | -8.739  | 1.159  | 1.00 | 64.53 |
| ATOM | 1335 | NH2  | ARG | A | 90 | -13.211 | -9.203  | 1.783  | 1.00 | 35.22 |
| ATOM | 1336 | H    | ARG | A | 90 | -9.165  | -11.746 | -3.163 | 1.00 | 32.42 |
| ATOM | 1337 | HA   | ARG | A | 90 | -12.025 | -11.594 | -3.605 | 1.00 | 20.15 |
| ATOM | 1338 | 2HB  | ARG | A | 90 | -12.224 | -11.575 | -1.202 | 1.00 | 71.25 |
| ATOM | 1339 | 3HB  | ARG | A | 90 | -11.061 | -12.812 | -1.662 | 1.00 | 14.11 |
| ATOM | 1340 | 2HG  | ARG | A | 90 | -9.236  | -11.507 | -0.941 | 1.00 | 31.43 |
| ATOM | 1341 | 3HG  | ARG | A | 90 | -10.231 | -10.055 | -0.811 | 1.00 | 61.53 |
| ATOM | 1342 | 2HD  | ARG | A | 90 | -10.526 | -12.535 | 0.880  | 1.00 | 33.44 |
| ATOM | 1343 | 3HD  | ARG | A | 90 | -9.723  | -11.049 | 1.383  | 1.00 | 11.53 |
| ATOM | 1344 | HE   | ARG | A | 90 | -12.518 | -11.552 | 1.377  | 1.00 | 1.42  |
| ATOM | 1345 | 1HH1 | ARG | A | 90 | -10.152 | -9.051  | 0.856  | 1.00 | 72.22 |
| ATOM | 1346 | 2HH1 | ARG | A | 90 | -11.226 | -7.763  | 1.291  | 1.00 | 32.32 |
| ATOM | 1347 | 1HH2 | ARG | A | 90 | -13.941 | -9.865  | 1.953  | 1.00 | 54.34 |
| ATOM | 1348 | 2HH2 | ARG | A | 90 | -13.381 | -8.227  | 1.916  | 1.00 | 60.22 |

|      |      |     |     |   |    |         |        |         |      |       |
|------|------|-----|-----|---|----|---------|--------|---------|------|-------|
| ATOM | 1349 | N   | SER | A | 91 | -10.209 | -8.971 | -2.960  | 1.00 | 64.44 |
| ATOM | 1350 | CA  | SER | A | 91 | -10.205 | -7.514 | -2.914  | 1.00 | 51.14 |
| ATOM | 1351 | C   | SER | A | 91 | -11.084 | -6.933 | -4.018  | 1.00 | 63.44 |
| ATOM | 1352 | O   | SER | A | 91 | -11.397 | -7.593 | -5.009  | 1.00 | 60.53 |
| ATOM | 1353 | CB  | SER | A | 91 | -8.777  | -6.982 | -3.051  | 1.00 | 12.24 |
| ATOM | 1354 | OG  | SER | A | 91 | -8.397  | -6.242 | -1.903  | 1.00 | 52.34 |
| ATOM | 1355 | H   | SER | A | 91 | -9.354  | -9.452 | -2.961  | 1.00 | 34.23 |
| ATOM | 1356 | HA  | SER | A | 91 | -10.603 | -7.212 | -1.957  | 1.00 | 51.53 |
| ATOM | 1357 | 2HB | SER | A | 91 | -8.097  | -7.811 | -3.171  | 1.00 | 3.22  |
| ATOM | 1358 | 3HB | SER | A | 91 | -8.717  | -6.338 | -3.916  | 1.00 | 51.02 |
| ATOM | 1359 | HG  | SER | A | 91 | -7.620  | -5.716 | -2.105  | 1.00 | 2.44  |
| ATOM | 1360 | N   | PRO | A | 92 | -11.492 | -5.668 | -3.844  | 1.00 | 43.45 |
| ATOM | 1361 | CA  | PRO | A | 92 | -12.339 | -4.969 | -4.815  | 1.00 | 55.30 |
| ATOM | 1362 | C   | PRO | A | 92 | -11.600 | -4.656 | -6.111  | 1.00 | 42.32 |
| ATOM | 1363 | O   | PRO | A | 92 | -10.541 | -4.029 | -6.096  | 1.00 | 22.42 |
| ATOM | 1364 | CB  | PRO | A | 92 | -12.717 | -3.675 | -4.089  | 1.00 | 74.12 |
| ATOM | 1365 | CG  | PRO | A | 92 | -11.615 | -3.453 | -3.112  | 1.00 | 30.21 |
| ATOM | 1366 | CD  | PRO | A | 92 | -11.156 | -4.821 | -2.687  | 1.00 | 55.13 |
| ATOM | 1367 | HA  | PRO | A | 92 | -13.233 | -5.532 | -5.039  | 1.00 | 74.11 |
| ATOM | 1368 | 2HB | PRO | A | 92 | -12.783 | -2.865 | -4.802  | 1.00 | 73.43 |
| ATOM | 1369 | 3HB | PRO | A | 92 | -13.667 | -3.802 | -3.591  | 1.00 | 43.30 |
| ATOM | 1370 | 2HG | PRO | A | 92 | -10.807 | -2.917 | -3.585  | 1.00 | 41.14 |
| ATOM | 1371 | 3HG | PRO | A | 92 | -11.985 | -2.901 | -2.261  | 1.00 | 34.55 |
| ATOM | 1372 | 2HD | PRO | A | 92 | -10.092 | -4.822 | -2.504  | 1.00 | 72.00 |
| ATOM | 1373 | 3HD | PRO | A | 92 | -11.693 | -5.142 | -1.807  | 1.00 | 32.41 |
| ATOM | 1374 | N   | GLU | A | 93 | -12.165 | -5.095 | -7.231  | 1.00 | 74.51 |
| ATOM | 1375 | CA  | GLU | A | 93 | -11.558 | -4.861 | -8.536  | 1.00 | 21.52 |
| ATOM | 1376 | C   | GLU | A | 93 | -12.206 | -3.668 | -9.231  | 1.00 | 45.44 |
| ATOM | 1377 | O   | GLU | A | 93 | -13.243 | -3.802 | -9.878  | 1.00 | 74.15 |
| ATOM | 1378 | CB  | GLU | A | 93 | -11.686 | -6.108 | -9.414  | 1.00 | 21.23 |
| ATOM | 1379 | CG  | GLU | A | 93 | -10.552 | -7.102 | -9.228  | 1.00 | 63.23 |
| ATOM | 1380 | CD  | GLU | A | 93 | -9.203  | -6.528 | -9.617  | 1.00 | 53.12 |
| ATOM | 1381 | OE1 | GLU | A | 93 | -8.520  | -5.969 | -8.733  | 1.00 | 70.25 |
| ATOM | 1382 | OE2 | GLU | A | 93 | -8.831  | -6.637 | -10.804 | 1.00 | 54.42 |
| ATOM | 1383 | H   | GLU | A | 93 | -13.010 | -5.589 | -7.178  | 1.00 | 54.04 |
| ATOM | 1384 | HA  | GLU | A | 93 | -10.511 | -4.648 | -8.381  | 1.00 | 12.13 |
| ATOM | 1385 | 2HB | GLU | A | 93 | -12.615 | -6.605 | -9.179  | 1.00 | 34.43 |
| ATOM | 1386 | 3HB | GLU | A | 93 | -11.703 | -5.803 | -10.450 | 1.00 | 34.43 |
| ATOM | 1387 | 2HG | GLU | A | 93 | -10.514 | -7.397 | -8.190  | 1.00 | 52.23 |
| ATOM | 1388 | 3HG | GLU | A | 93 | -10.747 | -7.970 | -9.841  | 1.00 | 31.22 |
| TER  | 1389 |     | GLU | A | 93 |         |        |         |      |       |

ENDMDL  
END

**LOADED (PDB 2N6Z):**

| HEADER | STRUCTURE FROM CYANA 2.1                                |     |     |   |    | 03-JUL-15 |        | 1PDB   |      |       |
|--------|---------------------------------------------------------|-----|-----|---|----|-----------|--------|--------|------|-------|
| EXPDTA | NMR, 20 STRUCTURES                                      |     |     |   |    |           |        |        |      |       |
| REMARK | 99 B-FACTOR COLUMN STORES ADDITIONAL COORDINATE DIGITS. |     |     |   |    |           |        |        |      |       |
| MODEL  | 1                                                       |     |     |   |    |           |        |        |      |       |
| ATOM   | 1                                                       | N   | ASP | A | 14 | 1.328     | 0.000  | 0.000  | 1.00 | 4.00  |
| ATOM   | 2                                                       | CA  | ASP | A | 14 | 2.093     | -0.001 | -1.242 | 1.00 | 0.02  |
| ATOM   | 3                                                       | C   | ASP | A | 14 | 2.266     | 1.418  | -1.775 | 1.00 | 20.14 |
| ATOM   | 4                                                       | O   | ASP | A | 14 | 1.300     | 2.171  | -1.888 | 1.00 | 32.13 |
| ATOM   | 5                                                       | CB  | ASP | A | 14 | 1.401     | -0.872 | -2.291 | 1.00 | 72.22 |
| ATOM   | 6                                                       | CG  | ASP | A | 14 | -0.088    | -0.600 | -2.379 | 1.00 | 41.22 |
| ATOM   | 7                                                       | OD1 | ASP | A | 14 | -0.473    | 0.385  | -3.044 | 1.00 | 1.33  |
| ATOM   | 8                                                       | OD2 | ASP | A | 14 | -0.868    | -1.372 | -1.784 | 1.00 | 72.14 |
| ATOM   | 9                                                       | H   | ASP | A | 14 | 1.806     | -0.000 | 0.856  | 1.00 | 64.11 |

|      |    |      |     |   |    |        |        |        |      |       |
|------|----|------|-----|---|----|--------|--------|--------|------|-------|
| ATOM | 10 | HA   | ASP | A | 14 | 3.068  | -0.414 | -1.031 | 1.00 | 12.03 |
| ATOM | 11 | 2HB  | ASP | A | 14 | 1.841  | -0.678 | -3.258 | 1.00 | 41.24 |
| ATOM | 12 | 3HB  | ASP | A | 14 | 1.544  | -1.912 | -2.037 | 1.00 | 62.24 |
| ATOM | 13 | N    | ASN | A | 15 | 3.504  | 1.776  | -2.099 | 1.00 | 61.23 |
| ATOM | 14 | CA   | ASN | A | 15 | 3.804  | 3.105  | -2.619 | 1.00 | 2.24  |
| ATOM | 15 | C    | ASN | A | 15 | 3.712  | 3.128  | -4.141 | 1.00 | 60.03 |
| ATOM | 16 | O    | ASN | A | 15 | 3.429  | 2.109  | -4.771 | 1.00 | 63.15 |
| ATOM | 17 | CB   | ASN | A | 15 | 5.200  | 3.546  | -2.174 | 1.00 | 63.13 |
| ATOM | 18 | CG   | ASN | A | 15 | 5.179  | 4.863  | -1.424 | 1.00 | 2.44  |
| ATOM | 19 | ND2  | ASN | A | 15 | 5.500  | 4.816  | -0.136 | 1.00 | 32.32 |
| ATOM | 20 | OD1  | ASN | A | 15 | 4.878  | 5.911  | -1.995 | 1.00 | 43.51 |
| ATOM | 21 | H    | ASN | A | 15 | 4.234  | 1.131  | -1.987 | 1.00 | 14.12 |
| ATOM | 22 | HA   | ASN | A | 15 | 3.075  | 3.791  | -2.215 | 1.00 | 75.10 |
| ATOM | 23 | 2HB  | ASN | A | 15 | 5.620  | 2.791  | -1.525 | 1.00 | 71.13 |
| ATOM | 24 | 3HB  | ASN | A | 15 | 5.830  | 3.658  | -3.044 | 1.00 | 22.21 |
| ATOM | 25 | 1HD2 | ASN | A | 15 | 5.729  | 3.945  | 0.253  | 1.00 | 51.44 |
| ATOM | 26 | 2HD2 | ASN | A | 15 | 5.494  | 5.653  | 0.374  | 1.00 | 74.24 |
| ATOM | 27 | N    | ARG | A | 16 | 3.953  | 4.297  | -4.726 | 1.00 | 22.12 |
| ATOM | 28 | CA   | ARG | A | 16 | 3.897  | 4.453  | -6.174 | 1.00 | 70.23 |
| ATOM | 29 | C    | ARG | A | 16 | 5.196  | 3.984  | -6.822 | 1.00 | 64.04 |
| ATOM | 30 | O    | ARG | A | 16 | 5.184  | 3.365  | -7.887 | 1.00 | 55.31 |
| ATOM | 31 | CB   | ARG | A | 16 | 3.630  | 5.914  | -6.541 | 1.00 | 73.33 |
| ATOM | 32 | CG   | ARG | A | 16 | 2.379  | 6.486  | -5.893 | 1.00 | 64.51 |
| ATOM | 33 | CD   | ARG | A | 16 | 1.249  | 6.634  | -6.899 | 1.00 | 35.31 |
| ATOM | 34 | NE   | ARG | A | 16 | -0.008 | 7.014  | -6.258 | 1.00 | 64.21 |
| ATOM | 35 | CZ   | ARG | A | 16 | -1.176 | 7.040  | -6.889 | 1.00 | 72.22 |
| ATOM | 36 | NH1  | ARG | A | 16 | -1.249 | 6.709  | -8.171 | 1.00 | 45.01 |
| ATOM | 37 | NH2  | ARG | A | 16 | -2.276 | 7.397  | -6.238 | 1.00 | 24.44 |
| ATOM | 38 | H    | ARG | A | 16 | 4.173  | 5.073  | -4.170 | 1.00 | 4.42  |
| ATOM | 39 | HA   | ARG | A | 16 | 3.085  | 3.844  | -6.542 | 1.00 | 51.03 |
| ATOM | 40 | 2HB  | ARG | A | 16 | 4.474  | 6.511  | -6.231 | 1.00 | 44.23 |
| ATOM | 41 | 3HB  | ARG | A | 16 | 3.520  | 5.989  | -7.613 | 1.00 | 31.44 |
| ATOM | 42 | 2HG  | ARG | A | 16 | 2.059  | 5.822  | -5.103 | 1.00 | 40.32 |
| ATOM | 43 | 3HG  | ARG | A | 16 | 2.611  | 7.456  | -5.480 | 1.00 | 25.45 |
| ATOM | 44 | 2HD  | ARG | A | 16 | 1.520  | 7.394  | -7.616 | 1.00 | 72.33 |
| ATOM | 45 | 3HD  | ARG | A | 16 | 1.112  | 5.691  | -7.408 | 1.00 | 12.23 |
| ATOM | 46 | HE   | ARG | A | 16 | 0.023  | 7.262  | -5.311 | 1.00 | 20.00 |
| ATOM | 47 | 1HH1 | ARG | A | 16 | -0.422 | 6.439  | -8.664 | 1.00 | 61.32 |
| ATOM | 48 | 2HH1 | ARG | A | 16 | -2.130 | 6.728  | -8.644 | 1.00 | 0.23  |
| ATOM | 49 | 1HH2 | ARG | A | 16 | -2.225 | 7.646  | -5.271 | 1.00 | 50.42 |
| ATOM | 50 | 2HH2 | ARG | A | 16 | -3.154 | 7.416  | -6.713 | 1.00 | 74.04 |
| ATOM | 51 | N    | HIS | A | 17 | 6.317  | 4.283  | -6.173 | 1.00 | 41.32 |
| ATOM | 52 | CA   | HIS | A | 17 | 7.625  | 3.892  | -6.686 | 1.00 | 44.42 |
| ATOM | 53 | C    | HIS | A | 17 | 7.987  | 2.481  | -6.233 | 1.00 | 40.04 |
| ATOM | 54 | O    | HIS | A | 17 | 8.656  | 1.740  | -6.953 | 1.00 | 52.23 |
| ATOM | 55 | CB   | HIS | A | 17 | 8.695  | 4.880  | -6.220 | 1.00 | 4.02  |
| ATOM | 56 | CG   | HIS | A | 17 | 9.519  | 5.443  | -7.337 | 1.00 | 71.21 |
| ATOM | 57 | CD2  | HIS | A | 17 | 10.190 | 4.828  | -8.339 | 1.00 | 30.11 |
| ATOM | 58 | ND1  | HIS | A | 17 | 9.726  | 6.795  | -7.512 | 1.00 | 63.21 |
| ATOM | 59 | CE1  | HIS | A | 17 | 10.488 | 6.987  | -8.574 | 1.00 | 52.23 |
| ATOM | 60 | NE2  | HIS | A | 17 | 10.783 | 5.809  | -9.094 | 1.00 | 5.50  |
| ATOM | 61 | H    | HIS | A | 17 | 6.263  | 4.778  | -5.329 | 1.00 | 52.24 |
| ATOM | 62 | HA   | HIS | A | 17 | 7.578  | 3.910  | -7.764 | 1.00 | 75.24 |
| ATOM | 63 | 2HB  | HIS | A | 17 | 8.218  | 5.705  | -5.712 | 1.00 | 54.14 |
| ATOM | 64 | 3HB  | HIS | A | 17 | 9.363  | 4.380  | -5.533 | 1.00 | 64.25 |
| ATOM | 65 | HD1  | HIS | A | 17 | 9.367  | 7.507  | -6.944 | 1.00 | 2.05  |
| ATOM | 66 | HD2  | HIS | A | 17 | 10.248 | 3.763  | -8.513 | 1.00 | 61.43 |
| ATOM | 67 | HE1  | HIS | A | 17 | 10.814 | 7.944  | -8.953 | 1.00 | 41.14 |
| ATOM | 68 | N    | ALA | A | 18 | 7.541  | 2.116  | -5.036 | 1.00 | 12.52 |



|      |     |     |     |   |    |        |        |         |      |       |
|------|-----|-----|-----|---|----|--------|--------|---------|------|-------|
| ATOM | 69  | CA  | ALA | A | 18 | 7.816  | 0.794  | -4.488  | 1.00 | 43.10 |
| ATOM | 70  | C   | ALA | A | 18 | 7.492  | -0.298 | -5.501  | 1.00 | 73.41 |
| ATOM | 71  | O   | ALA | A | 18 | 8.113  | -1.361 | -5.503  | 1.00 | 12.22 |
| ATOM | 72  | CB  | ALA | A | 18 | 7.026  | 0.579  | -3.206  | 1.00 | 2.04  |
| ATOM | 73  | H   | ALA | A | 18 | 7.013  | 2.752  | -4.509  | 1.00 | 35.50 |
| ATOM | 74  | HA  | ALA | A | 18 | 8.868  | 0.746  | -4.246  | 1.00 | 64.30 |
| ATOM | 75  | 1HB | ALA | A | 18 | 6.295  | 1.367  | -3.098  | 1.00 | 1.21  |
| ATOM | 76  | 2HB | ALA | A | 18 | 6.524  | -0.376 | -3.249  | 1.00 | 14.44 |
| ATOM | 77  | 3HB | ALA | A | 18 | 7.699  | 0.594  | -2.362  | 1.00 | 4.44  |
| ATOM | 78  | N   | ALA | A | 19 | 6.515  | -0.030 | -6.361  | 1.00 | 35.20 |
| ATOM | 79  | CA  | ALA | A | 19 | 6.109  | -0.990 | -7.380  | 1.00 | 34.21 |
| ATOM | 80  | C   | ALA | A | 19 | 7.316  | -1.525 | -8.143  | 1.00 | 1.25  |
| ATOM | 81  | O   | ALA | A | 19 | 7.322  | -2.672 | -8.589  | 1.00 | 22.22 |
| ATOM | 82  | CB  | ALA | A | 19 | 5.116  | -0.353 | -8.340  | 1.00 | 55.51 |
| ATOM | 83  | H   | ALA | A | 19 | 6.057  | 0.835  | -6.310  | 1.00 | 33.54 |
| ATOM | 84  | HA  | ALA | A | 19 | 5.615  | -1.814 | -6.885  | 1.00 | 12.14 |
| ATOM | 85  | 1HB | ALA | A | 19 | 4.119  | -0.432 | -7.931  | 1.00 | 73.41 |
| ATOM | 86  | 2HB | ALA | A | 19 | 5.366  | 0.689  | -8.478  | 1.00 | 62.41 |
| ATOM | 87  | 3HB | ALA | A | 19 | 5.157  | -0.862 | -9.291  | 1.00 | 34.30 |
| ATOM | 88  | N   | ASP | A | 20 | 8.336  | -0.686 | -8.289  | 1.00 | 20.31 |
| ATOM | 89  | CA  | ASP | A | 20 | 9.550  | -1.075 | -8.998  | 1.00 | 32.03 |
| ATOM | 90  | C   | ASP | A | 20 | 10.089 | -2.399 | -8.466  | 1.00 | 70.30 |
| ATOM | 91  | O   | ASP | A | 20 | 10.617 | -3.215 | -9.223  | 1.00 | 15.04 |
| ATOM | 92  | CB  | ASP | A | 20 | 10.615 | 0.014  | -8.864  | 1.00 | 1.21  |
| ATOM | 93  | CG  | ASP | A | 20 | 10.740 | 0.859  | -10.116 | 1.00 | 52.15 |
| ATOM | 94  | OD1 | ASP | A | 20 | 11.823 | 0.842  | -10.739 | 1.00 | 34.12 |
| ATOM | 95  | OD2 | ASP | A | 20 | 9.754  | 1.537  | -10.475 | 1.00 | 23.20 |
| ATOM | 96  | H   | ASP | A | 20 | 8.271  | 0.216  | -7.910  | 1.00 | 64.34 |
| ATOM | 97  | HA  | ASP | A | 20 | 9.300  | -1.195 | -10.041 | 1.00 | 64.40 |
| ATOM | 98  | 2HB | ASP | A | 20 | 10.356 | 0.663  | -8.039  | 1.00 | 62.43 |
| ATOM | 99  | 3HB | ASP | A | 20 | 11.571 | -0.448 | -8.666  | 1.00 | 72.54 |
| ATOM | 100 | N   | TYR | A | 21 | 9.954  | -2.606 | -7.161  | 1.00 | 10.22 |
| ATOM | 101 | CA  | TYR | A | 21 | 10.431 | -3.829 | -6.527  | 1.00 | 73.42 |
| ATOM | 102 | C   | TYR | A | 21 | 9.676  | -5.046 | -7.055  | 1.00 | 2.21  |
| ATOM | 103 | O   | TYR | A | 21 | 10.253 | -6.119 | -7.230  | 1.00 | 51.33 |
| ATOM | 104 | CB  | TYR | A | 21 | 10.273 | -3.737 | -5.009  | 1.00 | 3.15  |
| ATOM | 105 | CG  | TYR | A | 21 | 11.572 | -3.910 | -4.253  | 1.00 | 72.15 |
| ATOM | 106 | CD1 | TYR | A | 21 | 11.633 | -4.695 | -3.109  | 1.00 | 32.24 |
| ATOM | 107 | CD2 | TYR | A | 21 | 12.737 | -3.288 | -4.684  | 1.00 | 61.20 |
| ATOM | 108 | CE1 | TYR | A | 21 | 12.817 | -4.856 | -2.415  | 1.00 | 13.10 |
| ATOM | 109 | CE2 | TYR | A | 21 | 13.926 | -3.444 | -3.998  | 1.00 | 33.54 |
| ATOM | 110 | CZ  | TYR | A | 21 | 13.960 | -4.229 | -2.864  | 1.00 | 24.03 |
| ATOM | 111 | OH  | TYR | A | 21 | 15.142 | -4.386 | -2.176  | 1.00 | 41.03 |
| ATOM | 112 | H   | TYR | A | 21 | 9.525  | -1.918 | -6.610  | 1.00 | 30.54 |
| ATOM | 113 | HA  | TYR | A | 21 | 11.479 | -3.939 | -6.765  | 1.00 | 32.25 |
| ATOM | 114 | 2HB | TYR | A | 21 | 9.869  | -2.770 | -4.754  | 1.00 | 12.44 |
| ATOM | 115 | 3HB | TYR | A | 21 | 9.591  | -4.506 | -4.677  | 1.00 | 1.12  |
| ATOM | 116 | HD1 | TYR | A | 21 | 10.735 | -5.185 | -2.760  | 1.00 | 23.14 |
| ATOM | 117 | HD2 | TYR | A | 21 | 12.706 | -2.674 | -5.572  | 1.00 | 43.04 |
| ATOM | 118 | HE1 | TYR | A | 21 | 12.845 | -5.470 | -1.527  | 1.00 | 75.41 |
| ATOM | 119 | HE2 | TYR | A | 21 | 14.821 | -2.953 | -4.349  | 1.00 | 22.25 |
| ATOM | 120 | HH  | TYR | A | 21 | 14.963 | -4.408 | -1.233  | 1.00 | 41.13 |
| ATOM | 121 | N   | GLN | A | 22 | 8.383  | -4.869 | -7.306  | 1.00 | 41.41 |
| ATOM | 122 | CA  | GLN | A | 22 | 7.549  | -5.951 | -7.814  | 1.00 | 33.32 |
| ATOM | 123 | C   | GLN | A | 22 | 8.188  | -6.605 | -9.034  | 1.00 | 42.03 |
| ATOM | 124 | O   | GLN | A | 22 | 8.126  | -7.823 | -9.201  | 1.00 | 52.42 |
| ATOM | 125 | CB  | GLN | A | 22 | 6.157  | -5.426 | -8.172  | 1.00 | 64.20 |
| ATOM | 126 | CG  | GLN | A | 22 | 5.454  | -4.730 | -7.018  | 1.00 | 61.01 |
| ATOM | 127 | CD  | GLN | A | 22 | 4.014  | -4.381 | -7.338  | 1.00 | 31.15 |

|      |     |      |     |   |    |        |         |         |      |       |
|------|-----|------|-----|---|----|--------|---------|---------|------|-------|
| ATOM | 128 | NE2  | GLN | A | 22 | 3.082  | -4.992  | -6.615  | 1.00 | 2.44  |
| ATOM | 129 | OE1  | GLN | A | 22 | 3.741  | -3.572  | -8.224  | 1.00 | 42.35 |
| ATOM | 130 | H    | GLN | A | 22 | 7.981  | -3.990  | -7.146  | 1.00 | 61.00 |
| ATOM | 131 | HA   | GLN | A | 22 | 7.454  | -6.691  | -7.033  | 1.00 | 43.31 |
| ATOM | 132 | 2HB  | GLN | A | 22 | 6.250  | -4.723  | -8.986  | 1.00 | 74.23 |
| ATOM | 133 | 3HB  | GLN | A | 22 | 5.544  | -6.256  | -8.491  | 1.00 | 13.21 |
| ATOM | 134 | 2HG  | GLN | A | 22 | 5.467  | -5.383  | -6.158  | 1.00 | 64.32 |
| ATOM | 135 | 3HG  | GLN | A | 22 | 5.987  | -3.820  | -6.785  | 1.00 | 50.25 |
| ATOM | 136 | 1HE2 | GLN | A | 22 | 3.373  | -5.624  | -5.924  | 1.00 | 4.32  |
| ATOM | 137 | 2HE2 | GLN | A | 22 | 2.143  | -4.784  | -6.799  | 1.00 | 63.22 |
| ATOM | 138 | N    | GLN | A | 23 | 8.802  | -5.788  | -9.884  | 1.00 | 10.42 |
| ATOM | 139 | CA   | GLN | A | 23 | 9.452  | -6.287  | -11.090 | 1.00 | 32.44 |
| ATOM | 140 | C    | GLN | A | 23 | 10.874 | -6.748  | -10.790 | 1.00 | 64.41 |
| ATOM | 141 | O    | GLN | A | 23 | 11.372 | -7.697  | -11.398 | 1.00 | 32.41 |
| ATOM | 142 | CB   | GLN | A | 23 | 9.471  | -5.205  | -12.170 | 1.00 | 53.03 |
| ATOM | 143 | CG   | GLN | A | 23 | 8.146  | -4.476  | -12.325 | 1.00 | 35.24 |
| ATOM | 144 | CD   | GLN | A | 23 | 7.758  | -4.271  | -13.776 | 1.00 | 33.43 |
| ATOM | 145 | NE2  | GLN | A | 23 | 6.832  | -5.090  | -14.263 | 1.00 | 25.03 |
| ATOM | 146 | OE1  | GLN | A | 23 | 8.284  | -3.387  | -14.452 | 1.00 | 72.11 |
| ATOM | 147 | H    | GLN | A | 23 | 8.818  | -4.827  | -9.696  | 1.00 | 13.44 |
| ATOM | 148 | HA   | GLN | A | 23 | 8.882  | -7.131  | -11.448 | 1.00 | 15.10 |
| ATOM | 149 | 2HB  | GLN | A | 23 | 10.230 | -4.479  | -11.922 | 1.00 | 40.53 |
| ATOM | 150 | 3HB  | GLN | A | 23 | 9.717  | -5.663  | -13.117 | 1.00 | 41.40 |
| ATOM | 151 | 2HG  | GLN | A | 23 | 7.373  | -5.054  | -11.840 | 1.00 | 73.30 |
| ATOM | 152 | 3HG  | GLN | A | 23 | 8.223  | -3.510  | -11.848 | 1.00 | 23.21 |
| ATOM | 153 | 1HE2 | GLN | A | 23 | 6.456  | -5.770  | -13.665 | 1.00 | 63.40 |
| ATOM | 154 | 2HE2 | GLN | A | 23 | 6.562  | -4.980  | -15.197 | 1.00 | 43.42 |
| ATOM | 155 | N    | LEU | A | 24 | 11.525 | -6.071  | -9.851  | 1.00 | 31.14 |
| ATOM | 156 | CA   | LEU | A | 24 | 12.892 | -6.411  | -9.470  | 1.00 | 53.11 |
| ATOM | 157 | C    | LEU | A | 24 | 12.950 | -7.792  | -8.825  | 1.00 | 50.12 |
| ATOM | 158 | O    | LEU | A | 24 | 13.653 | -8.682  | -9.304  | 1.00 | 33.21 |
| ATOM | 159 | CB   | LEU | A | 24 | 13.450 | -5.362  | -8.507  | 1.00 | 13.31 |
| ATOM | 160 | CG   | LEU | A | 24 | 14.973 | -5.236  | -8.461  | 1.00 | 11.42 |
| ATOM | 161 | CD1  | LEU | A | 24 | 15.389 | -3.773  | -8.502  | 1.00 | 31.43 |
| ATOM | 162 | CD2  | LEU | A | 24 | 15.527 | -5.915  | -7.217  | 1.00 | 32.01 |
| ATOM | 163 | H    | LEU | A | 24 | 11.077 | -5.325  | -9.401  | 1.00 | 54.15 |
| ATOM | 164 | HA   | LEU | A | 24 | 13.493 | -6.420  | -10.367 | 1.00 | 74.12 |
| ATOM | 165 | 2HB  | LEU | A | 24 | 13.047 | -4.402  | -8.794  | 1.00 | 23.42 |
| ATOM | 166 | 3HB  | LEU | A | 24 | 13.107 | -5.611  | -7.513  | 1.00 | 31.23 |
| ATOM | 167 | HG   | LEU | A | 24 | 15.395 | -5.726  | -9.327  | 1.00 | 72.50 |
| ATOM | 168 | 1HD1 | LEU | A | 24 | 16.322 | -3.650  | -7.973  | 1.00 | 50.22 |
| ATOM | 169 | 2HD1 | LEU | A | 24 | 14.627 | -3.169  | -8.033  | 1.00 | 34.03 |
| ATOM | 170 | 3HD1 | LEU | A | 24 | 15.512 | -3.463  | -9.529  | 1.00 | 63.00 |
| ATOM | 171 | 1HD2 | LEU | A | 24 | 14.884 | -6.737  | -6.940  | 1.00 | 73.40 |
| ATOM | 172 | 2HD2 | LEU | A | 24 | 15.569 | -5.202  | -6.406  | 1.00 | 34.21 |
| ATOM | 173 | 3HD2 | LEU | A | 24 | 16.520 | -6.287  | -7.422  | 1.00 | 15.12 |
| ATOM | 174 | N    | ARG | A | 25 | 12.206 | -7.963  | -7.738  | 1.00 | 35.43 |
| ATOM | 175 | CA   | ARG | A | 25 | 12.172 | -9.236  | -7.028  | 1.00 | 32.32 |
| ATOM | 176 | C    | ARG | A | 25 | 11.925 | -10.391 | -7.994  | 1.00 | 33.30 |
| ATOM | 177 | O    | ARG | A | 25 | 12.470 | -11.481 | -7.825  | 1.00 | 63.21 |
| ATOM | 178 | CB   | ARG | A | 25 | 11.085 | -9.216  | -5.952  | 1.00 | 15.11 |
| ATOM | 179 | CG   | ARG | A | 25 | 11.160 | -8.008  | -5.033  | 1.00 | 14.41 |
| ATOM | 180 | CD   | ARG | A | 25 | 11.036 | -8.410  | -3.572  | 1.00 | 35.42 |
| ATOM | 181 | NE   | ARG | A | 25 | 10.020 | -7.627  | -2.873  | 1.00 | 23.35 |
| ATOM | 182 | CZ   | ARG | A | 25 | 8.719  | -7.724  | -3.119  | 1.00 | 34.32 |
| ATOM | 183 | NH1  | ARG | A | 25 | 8.276  | -8.567  | -4.042  | 1.00 | 2.20  |
| ATOM | 184 | NH2  | ARG | A | 25 | 7.856  | -6.978  | -2.440  | 1.00 | 44.14 |
| ATOM | 185 | H    | ARG | A | 25 | 11.667 | -7.216  | -7.404  | 1.00 | 54.22 |
| ATOM | 186 | HA   | ARG | A | 25 | 13.132 | -9.378  | -6.554  | 1.00 | 53.23 |

|      |     |      |     |   |    |        |         |         |      |       |
|------|-----|------|-----|---|----|--------|---------|---------|------|-------|
| ATOM | 187 | 2HB  | ARG | A | 25 | 10.118 | -9.215  | -6.433  | 1.00 | 54.44 |
| ATOM | 188 | 3HB  | ARG | A | 25 | 11.176 | -10.106 | -5.348  | 1.00 | 72.33 |
| ATOM | 189 | 2HG  | ARG | A | 25 | 12.109 | -7.514  | -5.179  | 1.00 | 61.12 |
| ATOM | 190 | 3HG  | ARG | A | 25 | 10.357 | -7.329  | -5.280  | 1.00 | 51.10 |
| ATOM | 191 | 2HD  | ARG | A | 25 | 10.768 | -9.455  | -3.522  | 1.00 | 31.33 |
| ATOM | 192 | 3HD  | ARG | A | 25 | 11.989 | -8.260  | -3.089  | 1.00 | 4.22  |
| ATOM | 193 | HE   | ARG | A | 25 | 10.325 | -6.998  | -2.186  | 1.00 | 63.42 |
| ATOM | 194 | 1HH1 | ARG | A | 25 | 8.924  | -9.131  | -4.554  | 1.00 | 35.21 |
| ATOM | 195 | 2HH1 | ARG | A | 25 | 7.295  | -8.639  | -4.225  | 1.00 | 4.14  |
| ATOM | 196 | 1HH2 | ARG | A | 25 | 8.186  | -6.342  | -1.744  | 1.00 | 2.25  |
| ATOM | 197 | 2HH2 | ARG | A | 25 | 6.877  | -7.052  | -2.626  | 1.00 | 42.45 |
| ATOM | 198 | N    | GLU | A | 26 | 11.099 | -10.143 | -9.006  | 1.00 | 33.43 |
| ATOM | 199 | CA   | GLU | A | 26 | 10.779 | -11.164 | -9.997  | 1.00 | 51.53 |
| ATOM | 200 | C    | GLU | A | 26 | 11.926 | -11.337 | -10.989 | 1.00 | 31.02 |
| ATOM | 201 | O    | GLU | A | 26 | 12.366 | -12.455 | -11.256 | 1.00 | 32.43 |
| ATOM | 202 | CB   | GLU | A | 26 | 9.496  | -10.795 | -10.745 | 1.00 | 35.33 |
| ATOM | 203 | CG   | GLU | A | 26 | 8.239  | -10.937 | -9.903  | 1.00 | 33.13 |
| ATOM | 204 | CD   | GLU | A | 26 | 7.008  | -10.381 | -10.592 | 1.00 | 44.55 |
| ATOM | 205 | OE1  | GLU | A | 26 | 7.100  | -10.052 | -11.794 | 1.00 | 62.20 |
| ATOM | 206 | OE2  | GLU | A | 26 | 5.955  | -10.273 | -9.932  | 1.00 | 15.15 |
| ATOM | 207 | H    | GLU | A | 26 | 10.695 | -9.254  | -9.087  | 1.00 | 33.34 |
| ATOM | 208 | HA   | GLU | A | 26 | 10.626 | -12.096 | -9.476  | 1.00 | 74.31 |
| ATOM | 209 | 2HB  | GLU | A | 26 | 9.568  | -9.770  | -11.077 | 1.00 | 61.20 |
| ATOM | 210 | 3HB  | GLU | A | 26 | 9.399  | -11.438 | -11.608 | 1.00 | 4.43  |
| ATOM | 211 | 2HG  | GLU | A | 26 | 8.074  | -11.984 | -9.697  | 1.00 | 65.35 |
| ATOM | 212 | 3HG  | GLU | A | 26 | 8.382  | -10.407 | -8.972  | 1.00 | 65.53 |
| ATOM | 213 | N    | ARG | A | 27 | 12.405 | -10.222 | -11.531 | 1.00 | 72.44 |
| ATOM | 214 | CA   | ARG | A | 27 | 13.499 | -10.250 | -12.495 | 1.00 | 31.44 |
| ATOM | 215 | C    | ARG | A | 27 | 14.659 | -11.094 | -11.975 | 1.00 | 23.03 |
| ATOM | 216 | O    | ARG | A | 27 | 15.180 | -11.957 | -12.683 | 1.00 | 51.11 |
| ATOM | 217 | CB   | ARG | A | 27 | 13.981 | -8.829  | -12.793 | 1.00 | 31.54 |
| ATOM | 218 | CG   | ARG | A | 27 | 13.684 | -8.371  | -14.211 | 1.00 | 12.52 |
| ATOM | 219 | CD   | ARG | A | 27 | 12.662 | -7.245  | -14.229 | 1.00 | 52.45 |
| ATOM | 220 | NE   | ARG | A | 27 | 12.231 | -6.919  | -15.586 | 1.00 | 72.13 |
| ATOM | 221 | CZ   | ARG | A | 27 | 11.559 | -5.817  | -15.899 | 1.00 | 51.24 |
| ATOM | 222 | NH1  | ARG | A | 27 | 11.243 | -4.939  | -14.957 | 1.00 | 43.34 |
| ATOM | 223 | NH2  | ARG | A | 27 | 11.202 | -5.591  | -17.157 | 1.00 | 54.22 |
| ATOM | 224 | H    | ARG | A | 27 | 12.013 | -9.360  | -11.279 | 1.00 | 34.52 |
| ATOM | 225 | HA   | ARG | A | 27 | 13.127 | -10.694 | -13.406 | 1.00 | 43.42 |
| ATOM | 226 | 2HB  | ARG | A | 27 | 13.498 | -8.147  | -12.109 | 1.00 | 1.04  |
| ATOM | 227 | 3HB  | ARG | A | 27 | 15.049 | -8.785  | -12.639 | 1.00 | 75.02 |
| ATOM | 228 | 2HG  | ARG | A | 27 | 14.599 | -8.019  | -14.665 | 1.00 | 14.34 |
| ATOM | 229 | 3HG  | ARG | A | 27 | 13.297 | -9.206  | -14.776 | 1.00 | 3.43  |
| ATOM | 230 | 2HD  | ARG | A | 27 | 11.801 | -7.548  | -13.652 | 1.00 | 4.21  |
| ATOM | 231 | 3HD  | ARG | A | 27 | 13.105 | -6.367  | -13.782 | 1.00 | 34.41 |
| ATOM | 232 | HE   | ARG | A | 27 | 12.454 | -7.554  | -16.298 | 1.00 | 34.20 |
| ATOM | 233 | 1HH1 | ARG | A | 27 | 11.512 | -5.106  | -14.009 | 1.00 | 41.10 |
| ATOM | 234 | 2HH1 | ARG | A | 27 | 10.738 | -4.109  | -15.196 | 1.00 | 43.10 |
| ATOM | 235 | 1HH2 | ARG | A | 27 | 11.438 | -6.250  | -17.870 | 1.00 | 70.30 |
| ATOM | 236 | 2HH2 | ARG | A | 27 | 10.696 | -4.761  | -17.392 | 1.00 | 30.23 |
| ATOM | 237 | N    | LEU | A | 28 | 15.060 | -10.839 | -10.734 | 1.00 | 42.23 |
| ATOM | 238 | CA   | LEU | A | 28 | 16.160 | -11.574 | -10.119 | 1.00 | 34.11 |
| ATOM | 239 | C    | LEU | A | 28 | 15.950 | -13.079 | -10.252 | 1.00 | 31.14 |
| ATOM | 240 | O    | LEU | A | 28 | 16.833 | -13.800 | -10.718 | 1.00 | 13.13 |
| ATOM | 241 | CB   | LEU | A | 28 | 16.290 | -11.194 | -8.643  | 1.00 | 25.10 |
| ATOM | 242 | CG   | LEU | A | 28 | 17.190 | -9.997  | -8.335  | 1.00 | 42.44 |
| ATOM | 243 | CD1  | LEU | A | 28 | 16.435 | -8.693  | -8.545  | 1.00 | 72.54 |
| ATOM | 244 | CD2  | LEU | A | 28 | 17.724 | -10.082 | -6.913  | 1.00 | 65.21 |
| ATOM | 245 | H    | LEU | A | 28 | 14.607 | -10.140 | -10.219 | 1.00 | 51.31 |

|      |     |      |     |   |    |        |         |         |      |       |
|------|-----|------|-----|---|----|--------|---------|---------|------|-------|
| ATOM | 246 | HA   | LEU | A | 28 | 17.069 | -11.303 | -10.634 | 1.00 | 50.31 |
| ATOM | 247 | 2HB  | LEU | A | 28 | 15.303 | -10.970 | -8.271  | 1.00 | 12.54 |
| ATOM | 248 | 3HB  | LEU | A | 28 | 16.686 | -12.051 | -8.116  | 1.00 | 0.44  |
| ATOM | 249 | HG   | LEU | A | 28 | 18.034 | -10.005 | -9.012  | 1.00 | 30.23 |
| ATOM | 250 | 1HD1 | LEU | A | 28 | 17.128 | -7.867  | -8.517  | 1.00 | 2.25  |
| ATOM | 251 | 2HD1 | LEU | A | 28 | 15.699 | -8.574  | -7.764  | 1.00 | 2.02  |
| ATOM | 252 | 3HD1 | LEU | A | 28 | 15.939 | -8.715  | -9.505  | 1.00 | 63.41 |
| ATOM | 253 | 1HD2 | LEU | A | 28 | 16.917 | -10.332 | -6.240  | 1.00 | 63.24 |
| ATOM | 254 | 2HD2 | LEU | A | 28 | 18.147 | -9.129  | -6.629  | 1.00 | 61.25 |
| ATOM | 255 | 3HD2 | LEU | A | 28 | 18.487 | -10.845 | -6.860  | 1.00 | 51.04 |
| ATOM | 256 | N    | ILE | A | 29 | 14.776 | -13.546 | -9.841  | 1.00 | 14.00 |
| ATOM | 257 | CA   | ILE | A | 29 | 14.449 | -14.965 | -9.917  | 1.00 | 41.53 |
| ATOM | 258 | C    | ILE | A | 29 | 14.711 | -15.514 | -11.315 | 1.00 | 73.34 |
| ATOM | 259 | O    | ILE | A | 29 | 15.106 | -16.669 | -11.474 | 1.00 | 50.13 |
| ATOM | 260 | CB   | ILE | A | 29 | 12.978 | -15.225 | -9.543  | 1.00 | 1.44  |
| ATOM | 261 | CG1  | ILE | A | 29 | 12.878 | -15.733 | -8.103  | 1.00 | 1.01  |
| ATOM | 262 | CG2  | ILE | A | 29 | 12.354 | -16.222 | -10.507 | 1.00 | 23.31 |
| ATOM | 263 | CD1  | ILE | A | 29 | 13.627 | -14.876 | -7.106  | 1.00 | 61.42 |
| ATOM | 264 | H    | ILE | A | 29 | 14.113 | -12.922 | -9.479  | 1.00 | 10.30 |
| ATOM | 265 | HA   | ILE | A | 29 | 15.078 | -15.489 | -9.212  | 1.00 | 74.32 |
| ATOM | 266 | HB   | ILE | A | 29 | 12.438 | -14.294 | -9.626  | 1.00 | 45.35 |
| ATOM | 267 | 2HG1 | ILE | A | 29 | 11.841 | -15.755 | -7.807  | 1.00 | 23.42 |
| ATOM | 268 | 3HG1 | ILE | A | 29 | 13.284 | -16.733 | -8.053  | 1.00 | 60.14 |
| ATOM | 269 | 1HG2 | ILE | A | 29 | 12.993 | -17.090 | -10.590 | 1.00 | 53.54 |
| ATOM | 270 | 2HG2 | ILE | A | 29 | 11.386 | -16.524 | -10.136 | 1.00 | 42.41 |
| ATOM | 271 | 3HG2 | ILE | A | 29 | 12.242 | -15.763 | -11.478 | 1.00 | 32.35 |
| ATOM | 272 | 1HD1 | ILE | A | 29 | 13.462 | -15.256 | -6.109  | 1.00 | 24.42 |
| ATOM | 273 | 2HD1 | ILE | A | 29 | 14.682 | -14.900 | -7.332  | 1.00 | 5.02  |
| ATOM | 274 | 3HD1 | ILE | A | 29 | 13.269 | -13.858 | -7.166  | 1.00 | 62.40 |
| ATOM | 275 | N    | GLN | A | 30 | 14.489 | -14.679 | -12.325 | 1.00 | 11.10 |
| ATOM | 276 | CA   | GLN | A | 30 | 14.702 | -15.082 | -13.710 | 1.00 | 51.41 |
| ATOM | 277 | C    | GLN | A | 30 | 16.174 | -15.383 | -13.969 | 1.00 | 44.51 |
| ATOM | 278 | O    | GLN | A | 30 | 16.508 | -16.333 | -14.676 | 1.00 | 32.24 |
| ATOM | 279 | CB   | GLN | A | 30 | 14.218 | -13.986 | -14.662 | 1.00 | 32.40 |
| ATOM | 280 | CG   | GLN | A | 30 | 12.904 | -13.350 | -14.239 | 1.00 | 12.20 |
| ATOM | 281 | CD   | GLN | A | 30 | 12.250 | -12.563 | -15.358 | 1.00 | 34.23 |
| ATOM | 282 | NE2  | GLN | A | 30 | 11.180 | -13.113 | -15.921 | 1.00 | 40.41 |
| ATOM | 283 | OE1  | GLN | A | 30 | 12.701 | -11.474 | -15.712 | 1.00 | 55.40 |
| ATOM | 284 | H    | GLN | A | 30 | 14.174 | -13.771 | -12.134 | 1.00 | 63.20 |
| ATOM | 285 | HA   | GLN | A | 30 | 14.128 | -15.978 | -13.886 | 1.00 | 72.54 |
| ATOM | 286 | 2HB  | GLN | A | 30 | 14.969 | -13.212 | -14.712 | 1.00 | 73.15 |
| ATOM | 287 | 3HB  | GLN | A | 30 | 14.086 | -14.413 | -15.645 | 1.00 | 74.32 |
| ATOM | 288 | 2HG  | GLN | A | 30 | 12.226 | -14.129 | -13.924 | 1.00 | 73.10 |
| ATOM | 289 | 3HG  | GLN | A | 30 | 13.092 | -12.682 | -13.411 | 1.00 | 64.23 |
| ATOM | 290 | 1HE2 | GLN | A | 30 | 10.877 | -13.983 | -15.586 | 1.00 | 54.12 |
| ATOM | 291 | 2HE2 | GLN | A | 30 | 10.737 | -12.626 | -16.646 | 1.00 | 0.32  |
| ATOM | 292 | N    | GLU | A | 31 | 17.051 | -14.566 | -13.393 | 1.00 | 13.32 |
| ATOM | 293 | CA   | GLU | A | 31 | 18.488 | -14.745 | -13.563 | 1.00 | 52.12 |
| ATOM | 294 | C    | GLU | A | 31 | 19.016 | -15.828 | -12.627 | 1.00 | 12.12 |
| ATOM | 295 | O    | GLU | A | 31 | 19.929 | -16.577 | -12.977 | 1.00 | 41.52 |
| ATOM | 296 | CB   | GLU | A | 31 | 19.223 | -13.428 | -13.304 | 1.00 | 33.23 |
| ATOM | 297 | CG   | GLU | A | 31 | 18.450 | -12.201 | -13.756 | 1.00 | 43.52 |
| ATOM | 298 | CD   | GLU | A | 31 | 19.291 | -10.939 | -13.729 | 1.00 | 25.20 |
| ATOM | 299 | OE1  | GLU | A | 31 | 19.675 | -10.459 | -14.816 | 1.00 | 52.04 |
| ATOM | 300 | OE2  | GLU | A | 31 | 19.567 | -10.433 | -12.621 | 1.00 | 54.44 |
| ATOM | 301 | H    | GLU | A | 31 | 16.723 | -13.825 | -12.841 | 1.00 | 22.22 |
| ATOM | 302 | HA   | GLU | A | 31 | 18.665 | -15.050 | -14.583 | 1.00 | 62.33 |
| ATOM | 303 | 2HB  | GLU | A | 31 | 19.413 | -13.339 | -12.244 | 1.00 | 50.33 |
| ATOM | 304 | 3HB  | GLU | A | 31 | 20.166 | -13.447 | -13.829 | 1.00 | 22.50 |

|      |     |      |     |   |    |        |         |         |      |       |
|------|-----|------|-----|---|----|--------|---------|---------|------|-------|
| ATOM | 305 | 2HG  | GLU | A | 31 | 18.103 | -12.361 | -14.766 | 1.00 | 20.22 |
| ATOM | 306 | 3HG  | GLU | A | 31 | 17.601 | -12.064 | -13.102 | 1.00 | 44.24 |
| ATOM | 307 | N    | LEU | A | 32 | 18.435 | -15.905 | -11.434 | 1.00 | 44.14 |
| ATOM | 308 | CA   | LEU | A | 32 | 18.847 | -16.896 | -10.446 | 1.00 | 12.32 |
| ATOM | 309 | C    | LEU | A | 32 | 18.337 | -18.283 | -10.821 | 1.00 | 34.44 |
| ATOM | 310 | O    | LEU | A | 32 | 18.861 | -19.295 | -10.356 | 1.00 | 41.43 |
| ATOM | 311 | CB   | LEU | A | 32 | 18.330 | -16.507 | -9.060  | 1.00 | 11.04 |
| ATOM | 312 | CG   | LEU | A | 32 | 18.785 | -15.147 | -8.531  | 1.00 | 3.55  |
| ATOM | 313 | CD1  | LEU | A | 32 | 18.198 | -14.886 | -7.152  | 1.00 | 53.13 |
| ATOM | 314 | CD2  | LEU | A | 32 | 20.305 | -15.073 | -8.487  | 1.00 | 54.53 |
| ATOM | 315 | H    | LEU | A | 32 | 17.713 | -15.281 | -11.212 | 1.00 | 62.55 |
| ATOM | 316 | HA   | LEU | A | 32 | 19.926 | -16.915 | -10.426 | 1.00 | 63.40 |
| ATOM | 317 | 2HB  | LEU | A | 32 | 17.251 | -16.502 | -9.098  | 1.00 | 65.33 |
| ATOM | 318 | 3HB  | LEU | A | 32 | 18.660 | -17.262 | -8.361  | 1.00 | 20.44 |
| ATOM | 319 | HG   | LEU | A | 32 | 18.431 | -14.371 | -9.196  | 1.00 | 34.50 |
| ATOM | 320 | 1HD1 | LEU | A | 32 | 18.921 | -14.362 | -6.546  | 1.00 | 21.53 |
| ATOM | 321 | 2HD1 | LEU | A | 32 | 17.948 | -15.826 | -6.684  | 1.00 | 31.32 |
| ATOM | 322 | 3HD1 | LEU | A | 32 | 17.306 | -14.284 | -7.249  | 1.00 | 74.43 |
| ATOM | 323 | 1HD2 | LEU | A | 32 | 20.624 | -14.827 | -7.485  | 1.00 | 62.13 |
| ATOM | 324 | 2HD2 | LEU | A | 32 | 20.647 | -14.309 | -9.171  | 1.00 | 63.53 |
| ATOM | 325 | 3HD2 | LEU | A | 32 | 20.720 | -16.027 | -8.774  | 1.00 | 72.04 |
| ATOM | 326 | N    | ASN | A | 33 | 17.311 | -18.323 | -11.666 | 1.00 | 4.05  |
| ATOM | 327 | CA   | ASN | A | 33 | 16.731 | -19.587 | -12.105 | 1.00 | 1.15  |
| ATOM | 328 | C    | ASN | A | 33 | 16.211 | -20.389 | -10.915 | 1.00 | 53.34 |
| ATOM | 329 | O    | ASN | A | 33 | 16.524 | -21.570 | -10.764 | 1.00 | 70.33 |
| ATOM | 330 | CB   | ASN | A | 33 | 17.768 | -20.408 | -12.873 | 1.00 | 60.43 |
| ATOM | 331 | CG   | ASN | A | 33 | 17.136 | -21.297 | -13.927 | 1.00 | 32.43 |
| ATOM | 332 | ND2  | ASN | A | 33 | 17.860 | -22.331 | -14.340 | 1.00 | 74.20 |
| ATOM | 333 | OD1  | ASN | A | 33 | 16.010 | -21.057 | -14.363 | 1.00 | 70.42 |
| ATOM | 334 | H    | ASN | A | 33 | 16.936 | -17.483 | -12.002 | 1.00 | 13.53 |
| ATOM | 335 | HA   | ASN | A | 33 | 15.905 | -19.362 | -12.761 | 1.00 | 55.44 |
| ATOM | 336 | 2HB  | ASN | A | 33 | 18.458 | -19.737 | -13.364 | 1.00 | 22.33 |
| ATOM | 337 | 3HB  | ASN | A | 33 | 18.311 | -21.033 | -12.180 | 1.00 | 13.44 |
| ATOM | 338 | 1HD2 | ASN | A | 33 | 18.748 | -22.461 | -13.948 | 1.00 | 5.22  |
| ATOM | 339 | 2HD2 | ASN | A | 33 | 17.475 | -22.922 | -15.021 | 1.00 | 3.00  |
| ATOM | 340 | N    | LEU | A | 34 | 15.414 | -19.739 | -10.074 | 1.00 | 42.10 |
| ATOM | 341 | CA   | LEU | A | 34 | 14.849 | -20.391 | -8.898  | 1.00 | 12.22 |
| ATOM | 342 | C    | LEU | A | 34 | 13.508 | -19.769 | -8.522  | 1.00 | 53.32 |
| ATOM | 343 | O    | LEU | A | 34 | 13.008 | -18.879 | -9.212  | 1.00 | 2.12  |
| ATOM | 344 | CB   | LEU | A | 34 | 15.819 | -20.290 | -7.719  | 1.00 | 75.31 |
| ATOM | 345 | CG   | LEU | A | 34 | 16.599 | -18.980 | -7.602  | 1.00 | 33.43 |
| ATOM | 346 | CD1  | LEU | A | 34 | 15.647 | -17.804 | -7.445  | 1.00 | 62.53 |
| ATOM | 347 | CD2  | LEU | A | 34 | 17.571 | -19.042 | -6.432  | 1.00 | 54.43 |
| ATOM | 348 | H    | LEU | A | 34 | 15.200 | -18.799 | -10.247 | 1.00 | 4.31  |
| ATOM | 349 | HA   | LEU | A | 34 | 14.694 | -21.432 | -9.138  | 1.00 | 62.15 |
| ATOM | 350 | 2HB  | LEU | A | 34 | 15.250 | -20.418 | -6.811  | 1.00 | 74.41 |
| ATOM | 351 | 3HB  | LEU | A | 34 | 16.534 | -21.096 | -7.811  | 1.00 | 14.54 |
| ATOM | 352 | HG   | LEU | A | 34 | 17.171 | -18.828 | -8.506  | 1.00 | 45.41 |
| ATOM | 353 | 1HD1 | LEU | A | 34 | 16.214 | -16.887 | -7.395  | 1.00 | 31.21 |
| ATOM | 354 | 2HD1 | LEU | A | 34 | 15.074 | -17.924 | -6.538  | 1.00 | 54.21 |
| ATOM | 355 | 3HD1 | LEU | A | 34 | 14.977 | -17.769 | -8.292  | 1.00 | 43.41 |
| ATOM | 356 | 1HD2 | LEU | A | 34 | 17.226 | -18.389 | -5.644  | 1.00 | 35.33 |
| ATOM | 357 | 2HD2 | LEU | A | 34 | 18.549 | -18.722 | -6.761  | 1.00 | 23.53 |
| ATOM | 358 | 3HD2 | LEU | A | 34 | 17.627 | -20.055 | -6.063  | 1.00 | 55.24 |
| ATOM | 359 | N    | THR | A | 35 | 12.929 | -20.241 | -7.422  | 1.00 | 61.35 |
| ATOM | 360 | CA   | THR | A | 35 | 11.647 | -19.731 | -6.954  | 1.00 | 73.21 |
| ATOM | 361 | C    | THR | A | 35 | 11.816 | -18.404 | -6.224  | 1.00 | 5.12  |
| ATOM | 362 | O    | THR | A | 35 | 12.909 | -18.046 | -5.782  | 1.00 | 53.14 |
| ATOM | 363 | CB   | THR | A | 35 | 10.952 | -20.735 | -6.015  | 1.00 | 72.43 |

|      |     |      |     |   |    |        |         |        |      |       |
|------|-----|------|-----|---|----|--------|---------|--------|------|-------|
| ATOM | 364 | CG2  | THR | A | 35 | 9.823  | -21.457 | -6.735 | 1.00 | 73.33 |
| ATOM | 365 | OG1  | THR | A | 35 | 11.902 | -21.690 | -5.529 | 1.00 | 71.24 |
| ATOM | 366 | H    | THR | A | 35 | 13.376 | -20.951 | -6.915 | 1.00 | 44.45 |
| ATOM | 367 | HA   | THR | A | 35 | 11.014 | -19.579 | -7.816 | 1.00 | 55.40 |
| ATOM | 368 | HB   | THR | A | 35 | 10.536 | -20.194 | -5.177 | 1.00 | 44.35 |
| ATOM | 369 | HG1  | THR | A | 35 | 11.482 | -22.255 | -4.876 | 1.00 | 24.30 |
| ATOM | 370 | 1HG2 | THR | A | 35 | 9.026  | -21.667 | -6.037 | 1.00 | 10.41 |
| ATOM | 371 | 2HG2 | THR | A | 35 | 10.193 | -22.384 | -7.148 | 1.00 | 2.05  |
| ATOM | 372 | 3HG2 | THR | A | 35 | 9.448  | -20.833 | -7.532 | 1.00 | 75.11 |
| ATOM | 373 | N    | PRO | A | 36 | 10.712 | -17.655 | -6.091 | 1.00 | 53.04 |
| ATOM | 374 | CA   | PRO | A | 36 | 10.713 | -16.355 | -5.413 | 1.00 | 60.33 |
| ATOM | 375 | C    | PRO | A | 36 | 10.923 | -16.487 | -3.909 | 1.00 | 13.33 |
| ATOM | 376 | O    | PRO | A | 36 | 11.284 | -15.521 | -3.237 | 1.00 | 53.32 |
| ATOM | 377 | CB   | PRO | A | 36 | 9.319  | -15.798 | -5.712 | 1.00 | 41.12 |
| ATOM | 378 | CG   | PRO | A | 36 | 8.474  | -17.001 | -5.953 | 1.00 | 52.33 |
| ATOM | 379 | CD   | PRO | A | 36 | 9.376  | -18.019 | -6.593 | 1.00 | 20.40 |
| ATOM | 380 | HA   | PRO | A | 36 | 11.462 | -15.694 | -5.824 | 1.00 | 25.53 |
| ATOM | 381 | 2HB  | PRO | A | 36 | 8.966  | -15.230 | -4.863 | 1.00 | 42.40 |
| ATOM | 382 | 3HB  | PRO | A | 36 | 9.361  | -15.163 | -6.585 | 1.00 | 34.52 |
| ATOM | 383 | 2HG  | PRO | A | 36 | 8.091  | -17.375 | -5.016 | 1.00 | 2.51  |
| ATOM | 384 | 3HG  | PRO | A | 36 | 7.661  | -16.750 | -6.619 | 1.00 | 31.11 |
| ATOM | 385 | 2HD  | PRO | A | 36 | 9.104  | -19.016 | -6.277 | 1.00 | 41.41 |
| ATOM | 386 | 3HD  | PRO | A | 36 | 9.334  | -17.938 | -7.669 | 1.00 | 72.12 |
| ATOM | 387 | N    | GLN | A | 37 | 10.695 | -17.688 | -3.387 | 1.00 | 15.53 |
| ATOM | 388 | CA   | GLN | A | 37 | 10.859 | -17.944 | -1.961 | 1.00 | 13.23 |
| ATOM | 389 | C    | GLN | A | 37 | 12.204 | -18.603 | -1.678 | 1.00 | 24.35 |
| ATOM | 390 | O    | GLN | A | 37 | 12.773 | -18.436 | -0.599 | 1.00 | 51.30 |
| ATOM | 391 | CB   | GLN | A | 37 | 9.724  | -18.832 | -1.447 | 1.00 | 1.44  |
| ATOM | 392 | CG   | GLN | A | 37 | 9.117  | -18.347 | -0.140 | 1.00 | 21.33 |
| ATOM | 393 | CD   | GLN | A | 37 | 9.591  | -19.149 | 1.056  | 1.00 | 31.24 |
| ATOM | 394 | NE2  | GLN | A | 37 | 10.691 | -18.717 | 1.661  | 1.00 | 64.01 |
| ATOM | 395 | OE1  | GLN | A | 37 | 8.975  | -20.147 | 1.433  | 1.00 | 12.41 |
| ATOM | 396 | H    | GLN | A | 37 | 10.409 | -18.418 | -3.974 | 1.00 | 12.53 |
| ATOM | 397 | HA   | GLN | A | 37 | 10.822 | -16.995 | -1.447 | 1.00 | 71.02 |
| ATOM | 398 | 2HB  | GLN | A | 37 | 8.943  | -18.864 | -2.191 | 1.00 | 60.53 |
| ATOM | 399 | 3HB  | GLN | A | 37 | 10.106 | -19.830 | -1.292 | 1.00 | 70.05 |
| ATOM | 400 | 2HG  | GLN | A | 37 | 9.391  | -17.313 | 0.009  | 1.00 | 64.34 |
| ATOM | 401 | 3HG  | GLN | A | 37 | 8.042  | -18.427 | -0.206 | 1.00 | 21.42 |
| ATOM | 402 | 1HE2 | GLN | A | 37 | 11.129 | -17.914 | 1.306  | 1.00 | 31.42 |
| ATOM | 403 | 2HE2 | GLN | A | 37 | 11.019 | -19.216 | 2.437  | 1.00 | 45.30 |
| ATOM | 404 | N    | GLN | A | 38 | 12.707 | -19.353 | -2.653 | 1.00 | 22.21 |
| ATOM | 405 | CA   | GLN | A | 38 | 13.986 | -20.039 | -2.507 | 1.00 | 51.40 |
| ATOM | 406 | C    | GLN | A | 38 | 15.138 | -19.040 | -2.474 | 1.00 | 62.03 |
| ATOM | 407 | O    | GLN | A | 38 | 16.142 | -19.256 | -1.794 | 1.00 | 32.14 |
| ATOM | 408 | CB   | GLN | A | 38 | 14.189 | -21.033 | -3.652 | 1.00 | 2.33  |
| ATOM | 409 | CG   | GLN | A | 38 | 13.658 | -22.425 | -3.350 | 1.00 | 41.22 |
| ATOM | 410 | CD   | GLN | A | 38 | 14.513 | -23.170 | -2.344 | 1.00 | 35.02 |
| ATOM | 411 | NE2  | GLN | A | 38 | 14.473 | -24.496 | -2.401 | 1.00 | 25.15 |
| ATOM | 412 | OE1  | GLN | A | 38 | 15.200 | -22.561 | -1.524 | 1.00 | 43.31 |
| ATOM | 413 | H    | GLN | A | 38 | 12.207 | -19.448 | -3.489 | 1.00 | 73.04 |
| ATOM | 414 | HA   | GLN | A | 38 | 13.968 | -20.579 | -1.573 | 1.00 | 14.34 |
| ATOM | 415 | 2HB  | GLN | A | 38 | 13.684 | -20.660 | -4.530 | 1.00 | 72.22 |
| ATOM | 416 | 3HB  | GLN | A | 38 | 15.246 | -21.112 | -3.860 | 1.00 | 51.24 |
| ATOM | 417 | 2HG  | GLN | A | 38 | 12.657 | -22.336 | -2.954 | 1.00 | 24.53 |
| ATOM | 418 | 3HG  | GLN | A | 38 | 13.631 | -22.992 | -4.269 | 1.00 | 24.34 |
| ATOM | 419 | 1HE2 | GLN | A | 38 | 13.904 | -24.913 | -3.081 | 1.00 | 33.21 |
| ATOM | 420 | 2HE2 | GLN | A | 38 | 15.016 | -25.003 | -1.763 | 1.00 | 4.14  |
| ATOM | 421 | N    | LEU | A | 39 | 14.988 | -17.947 | -3.214 | 1.00 | 41.10 |
| ATOM | 422 | CA   | LEU | A | 39 | 16.017 | -16.914 | -3.270 | 1.00 | 52.02 |

|      |     |      |     |   |    |        |         |        |      |       |
|------|-----|------|-----|---|----|--------|---------|--------|------|-------|
| ATOM | 423 | C    | LEU | A | 39 | 16.453 | -16.503 | -1.868 | 1.00 | 21.04 |
| ATOM | 424 | O    | LEU | A | 39 | 15.702 | -16.653 | -0.903 | 1.00 | 70.24 |
| ATOM | 425 | CB   | LEU | A | 39 | 15.501 | -15.693 | -4.034 | 1.00 | 74.42 |
| ATOM | 426 | CG   | LEU | A | 39 | 14.891 | -14.578 | -3.184 | 1.00 | 45.22 |
| ATOM | 427 | CD1  | LEU | A | 39 | 15.968 | -13.605 | -2.729 | 1.00 | 62.11 |
| ATOM | 428 | CD2  | LEU | A | 39 | 13.805 | -13.848 | -3.961 | 1.00 | 31.42 |
| ATOM | 429 | H    | LEU | A | 39 | 14.167 | -17.830 | -3.735 | 1.00 | 33.51 |
| ATOM | 430 | HA   | LEU | A | 39 | 16.868 | -17.323 | -3.794 | 1.00 | 2.32  |
| ATOM | 431 | 2HB  | LEU | A | 39 | 16.328 | -15.274 | -4.586 | 1.00 | 21.34 |
| ATOM | 432 | 3HB  | LEU | A | 39 | 14.744 | -16.034 | -4.727 | 1.00 | 40.30 |
| ATOM | 433 | HG   | LEU | A | 39 | 14.440 | -15.011 | -2.302 | 1.00 | 71.45 |
| ATOM | 434 | 1HD1 | LEU | A | 39 | 15.884 | -13.447 | -1.665 | 1.00 | 14.23 |
| ATOM | 435 | 2HD1 | LEU | A | 39 | 15.844 | -12.664 | -3.244 | 1.00 | 40.02 |
| ATOM | 436 | 3HD1 | LEU | A | 39 | 16.942 | -14.014 | -2.957 | 1.00 | 11.22 |
| ATOM | 437 | 1HD2 | LEU | A | 39 | 13.063 | -14.559 | -4.295 | 1.00 | 23.02 |
| ATOM | 438 | 2HD2 | LEU | A | 39 | 14.243 | -13.356 | -4.817 | 1.00 | 62.41 |
| ATOM | 439 | 3HD2 | LEU | A | 39 | 13.338 | -13.113 | -3.322 | 1.00 | 70.44 |
| ATOM | 440 | N    | HIS | A | 40 | 17.671 | -15.982 | -1.761 | 1.00 | 43.32 |
| ATOM | 441 | CA   | HIS | A | 40 | 18.207 | -15.546 | -0.476 | 1.00 | 52.14 |
| ATOM | 442 | C    | HIS | A | 40 | 17.514 | -14.272 | -0.003 | 1.00 | 12.21 |
| ATOM | 443 | O    | HIS | A | 40 | 18.062 | -13.176 | -0.120 | 1.00 | 73.45 |
| ATOM | 444 | CB   | HIS | A | 40 | 19.714 | -15.312 | -0.581 | 1.00 | 41.32 |
| ATOM | 445 | CG   | HIS | A | 40 | 20.519 | -16.575 | -0.568 | 1.00 | 11.33 |
| ATOM | 446 | CD2  | HIS | A | 40 | 21.658 | -16.906 | -1.220 | 1.00 | 10.33 |
| ATOM | 447 | ND1  | HIS | A | 40 | 20.174 | -17.679 | 0.182  | 1.00 | 33.13 |
| ATOM | 448 | CE1  | HIS | A | 40 | 21.066 | -18.634 | -0.007 | 1.00 | 65.15 |
| ATOM | 449 | NE2  | HIS | A | 40 | 21.978 | -18.190 | -0.855 | 1.00 | 34.35 |
| ATOM | 450 | H    | HIS | A | 40 | 18.223 | -15.888 | -2.566 | 1.00 | 15.43 |
| ATOM | 451 | HA   | HIS | A | 40 | 18.022 | -16.329 | 0.243  | 1.00 | 63.53 |
| ATOM | 452 | 2HB  | HIS | A | 40 | 19.928 | -14.793 | -1.504 | 1.00 | 53.21 |
| ATOM | 453 | 3HB  | HIS | A | 40 | 20.036 | -14.703 | 0.251  | 1.00 | 22.04 |
| ATOM | 454 | HD1  | HIS | A | 40 | 19.392 | -17.751 | 0.768  | 1.00 | 73.41 |
| ATOM | 455 | HD2  | HIS | A | 40 | 22.214 | -16.276 | -1.901 | 1.00 | 34.41 |
| ATOM | 456 | HE1  | HIS | A | 40 | 21.054 | -19.612 | 0.451  | 1.00 | 40.41 |
| ATOM | 457 | N    | GLU | A | 41 | 16.306 | -14.424 | 0.532  | 1.00 | 61.35 |
| ATOM | 458 | CA   | GLU | A | 41 | 15.539 | -13.285 | 1.021  | 1.00 | 74.03 |
| ATOM | 459 | C    | GLU | A | 41 | 16.337 | -12.494 | 2.053  | 1.00 | 60.01 |
| ATOM | 460 | O    | GLU | A | 41 | 16.432 | -11.270 | 1.973  | 1.00 | 11.23 |
| ATOM | 461 | CB   | GLU | A | 41 | 14.218 | -13.757 | 1.633  | 1.00 | 1.52  |
| ATOM | 462 | CG   | GLU | A | 41 | 14.387 | -14.846 | 2.678  | 1.00 | 32.54 |
| ATOM | 463 | CD   | GLU | A | 41 | 13.067 | -15.470 | 3.089  | 1.00 | 21.22 |
| ATOM | 464 | OE1  | GLU | A | 41 | 13.014 | -16.711 | 3.223  | 1.00 | 42.20 |
| ATOM | 465 | OE2  | GLU | A | 41 | 12.088 | -14.719 | 3.276  | 1.00 | 12.55 |
| ATOM | 466 | H    | GLU | A | 41 | 15.922 | -15.324 | 0.598  | 1.00 | 43.52 |
| ATOM | 467 | HA   | GLU | A | 41 | 15.325 | -12.643 | 0.179  | 1.00 | 24.05 |
| ATOM | 468 | 2HB  | GLU | A | 41 | 13.729 | -12.913 | 2.098  | 1.00 | 60.02 |
| ATOM | 469 | 3HB  | GLU | A | 41 | 13.586 | -14.138 | 0.845  | 1.00 | 50.00 |
| ATOM | 470 | 2HG  | GLU | A | 41 | 15.022 | -15.620 | 2.274  | 1.00 | 23.01 |
| ATOM | 471 | 3HG  | GLU | A | 41 | 14.854 | -14.419 | 3.553  | 1.00 | 22.24 |
| ATOM | 472 | N    | GLU | A | 42 | 16.908 | -13.204 | 3.021  | 1.00 | 4.31  |
| ATOM | 473 | CA   | GLU | A | 42 | 17.697 | -12.568 | 4.070  | 1.00 | 41.33 |
| ATOM | 474 | C    | GLU | A | 42 | 19.137 | -13.072 | 4.049  | 1.00 | 62.10 |
| ATOM | 475 | O    | GLU | A | 42 | 19.843 | -13.010 | 5.056  | 1.00 | 54.32 |
| ATOM | 476 | CB   | GLU | A | 42 | 17.072 | -12.833 | 5.441  | 1.00 | 70.11 |
| ATOM | 477 | CG   | GLU | A | 42 | 15.766 | -12.090 | 5.668  | 1.00 | 22.15 |
| ATOM | 478 | CD   | GLU | A | 42 | 14.959 | -12.667 | 6.816  | 1.00 | 44.52 |
| ATOM | 479 | OE1  | GLU | A | 42 | 14.508 | -11.881 | 7.676  | 1.00 | 70.51 |
| ATOM | 480 | OE2  | GLU | A | 42 | 14.780 | -13.902 | 6.854  | 1.00 | 53.41 |
| ATOM | 481 | H    | GLU | A | 42 | 16.796 | -14.177 | 3.031  | 1.00 | 64.14 |

|      |     |      |     |   |    |        |         |        |      |       |
|------|-----|------|-----|---|----|--------|---------|--------|------|-------|
| ATOM | 482 | HA   | GLU | A | 42 | 17.698 | -11.504 | 3.885  | 1.00 | 64.21 |
| ATOM | 483 | 2HB  | GLU | A | 42 | 16.882 | -13.892 | 5.538  | 1.00 | 50.22 |
| ATOM | 484 | 3HB  | GLU | A | 42 | 17.772 | -12.531 | 6.206  | 1.00 | 14.21 |
| ATOM | 485 | 2HG  | GLU | A | 42 | 15.988 | -11.057 | 5.889  | 1.00 | 44.34 |
| ATOM | 486 | 3HG  | GLU | A | 42 | 15.173 | -12.146 | 4.767  | 1.00 | 5.53  |
| ATOM | 487 | N    | SER | A | 43 | 19.566 | -13.572 | 2.895  | 1.00 | 62.43 |
| ATOM | 488 | CA   | SER | A | 43 | 20.920 | -14.092 | 2.743  | 1.00 | 62.02 |
| ATOM | 489 | C    | SER | A | 43 | 21.648 | -13.388 | 1.602  | 1.00 | 54.44 |
| ATOM | 490 | O    | SER | A | 43 | 21.024 | -12.753 | 0.752  | 1.00 | 42.11 |
| ATOM | 491 | CB   | SER | A | 43 | 20.885 | -15.600 | 2.487  | 1.00 | 52.15 |
| ATOM | 492 | OG   | SER | A | 43 | 22.056 | -16.031 | 1.814  | 1.00 | 14.54 |
| ATOM | 493 | H    | SER | A | 43 | 18.956 | -13.595 | 2.128  | 1.00 | 42.14 |
| ATOM | 494 | HA   | SER | A | 43 | 21.452 | -13.904 | 3.663  | 1.00 | 24.35 |
| ATOM | 495 | 2HB  | SER | A | 43 | 20.813 | -16.121 | 3.429  | 1.00 | 62.00 |
| ATOM | 496 | 3HB  | SER | A | 43 | 20.025 | -15.838 | 1.877  | 1.00 | 63.42 |
| ATOM | 497 | HG   | SER | A | 43 | 22.673 | -16.398 | 2.451  | 1.00 | 63.45 |
| ATOM | 498 | N    | ASN | A | 44 | 22.971 | -13.505 | 1.590  | 1.00 | 24.21 |
| ATOM | 499 | CA   | ASN | A | 44 | 23.785 | -12.880 | 0.554  | 1.00 | 3.42  |
| ATOM | 500 | C    | ASN | A | 44 | 23.403 | -13.402 | -0.827 | 1.00 | 40.24 |
| ATOM | 501 | O    | ASN | A | 44 | 23.601 | -14.578 | -1.136 | 1.00 | 4.24  |
| ATOM | 502 | CB   | ASN | A | 44 | 25.270 | -13.139 | 0.817  | 1.00 | 61.11 |
| ATOM | 503 | CG   | ASN | A | 44 | 25.909 | -12.046 | 1.652  | 1.00 | 61.22 |
| ATOM | 504 | ND2  | ASN | A | 44 | 25.426 | -11.880 | 2.878  | 1.00 | 43.44 |
| ATOM | 505 | OD1  | ASN | A | 44 | 26.826 | -11.360 | 1.200  | 1.00 | 61.32 |
| ATOM | 506 | H    | ASN | A | 44 | 23.412 | -14.024 | 2.295  | 1.00 | 73.50 |
| ATOM | 507 | HA   | ASN | A | 44 | 23.604 | -11.816 | 0.587  | 1.00 | 15.03 |
| ATOM | 508 | 2HB  | ASN | A | 44 | 25.378 | -14.077 | 1.343  | 1.00 | 11.50 |
| ATOM | 509 | 3HB  | ASN | A | 44 | 25.792 | -13.198 | -0.126 | 1.00 | 71.24 |
| ATOM | 510 | 1HD2 | ASN | A | 44 | 24.695 | -12.463 | 3.171  | 1.00 | 40.23 |
| ATOM | 511 | 2HD2 | ASN | A | 44 | 25.821 | -11.180 | 3.439  | 1.00 | 54.43 |
| ATOM | 512 | N    | LEU | A | 45 | 22.854 | -12.520 | -1.656 | 1.00 | 25.20 |
| ATOM | 513 | CA   | LEU | A | 45 | 22.445 | -12.891 | -3.006 | 1.00 | 35.20 |
| ATOM | 514 | C    | LEU | A | 45 | 23.648 | -13.309 | -3.845 | 1.00 | 51.41 |
| ATOM | 515 | O    | LEU | A | 45 | 23.529 | -14.133 | -4.752 | 1.00 | 34.11 |
| ATOM | 516 | CB   | LEU | A | 45 | 21.719 | -11.724 | -3.679 | 1.00 | 23.43 |
| ATOM | 517 | CG   | LEU | A | 45 | 20.394 | -11.302 | -3.044 | 1.00 | 32.32 |
| ATOM | 518 | CD1  | LEU | A | 45 | 19.683 | -10.283 | -3.920 | 1.00 | 40.40 |
| ATOM | 519 | CD2  | LEU | A | 45 | 19.506 | -12.515 | -2.806 | 1.00 | 60.23 |
| ATOM | 520 | H    | LEU | A | 45 | 22.722 | -11.598 | -1.354 | 1.00 | 14.11 |
| ATOM | 521 | HA   | LEU | A | 45 | 21.767 | -13.729 | -2.928 | 1.00 | 43.31 |
| ATOM | 522 | 2HB  | LEU | A | 45 | 22.380 | -10.871 | -3.663 | 1.00 | 32.33 |
| ATOM | 523 | 3HB  | LEU | A | 45 | 21.522 | -12.006 | -4.703 | 1.00 | 52.45 |
| ATOM | 524 | HG   | LEU | A | 45 | 20.592 | -10.839 | -2.087 | 1.00 | 33.11 |
| ATOM | 525 | 1HD1 | LEU | A | 45 | 18.694 | -10.642 | -4.160 | 1.00 | 52.31 |
| ATOM | 526 | 2HD1 | LEU | A | 45 | 20.244 | -10.137 | -4.831 | 1.00 | 65.51 |
| ATOM | 527 | 3HD1 | LEU | A | 45 | 19.608 | -9.344  | -3.391 | 1.00 | 14.12 |
| ATOM | 528 | 1HD2 | LEU | A | 45 | 19.611 | -12.842 | -1.782 | 1.00 | 73.33 |
| ATOM | 529 | 2HD2 | LEU | A | 45 | 19.802 | -13.314 | -3.471 | 1.00 | 43.32 |
| ATOM | 530 | 3HD2 | LEU | A | 45 | 18.477 | -12.251 | -2.997 | 1.00 | 14.44 |
| ATOM | 531 | N    | ILE | A | 46 | 24.806 | -12.736 | -3.535 | 1.00 | 40.32 |
| ATOM | 532 | CA   | ILE | A | 46 | 26.031 | -13.051 | -4.259 | 1.00 | 25.03 |
| ATOM | 533 | C    | ILE | A | 46 | 26.280 | -14.555 | -4.290 | 1.00 | 75.35 |
| ATOM | 534 | O    | ILE | A | 46 | 26.787 | -15.089 | -5.276 | 1.00 | 62.22 |
| ATOM | 535 | CB   | ILE | A | 46 | 27.252 | -12.354 | -3.629 | 1.00 | 61.12 |
| ATOM | 536 | CG1  | ILE | A | 46 | 27.015 | -10.845 | -3.540 | 1.00 | 64.02 |
| ATOM | 537 | CG2  | ILE | A | 46 | 28.507 | -12.652 | -4.436 | 1.00 | 72.23 |
| ATOM | 538 | CD1  | ILE | A | 46 | 26.798 | -10.187 | -4.885 | 1.00 | 23.11 |
| ATOM | 539 | H    | ILE | A | 46 | 24.837 | -12.086 | -2.802 | 1.00 | 62.33 |
| ATOM | 540 | HA   | ILE | A | 46 | 25.921 | -12.694 | -5.272 | 1.00 | 40.44 |



|      |     |      |     |   |    |        |         |         |      |       |
|------|-----|------|-----|---|----|--------|---------|---------|------|-------|
| ATOM | 541 | HB   | ILE | A | 46 | 27.391 | -12.749 | -2.634  | 1.00 | 53.14 |
| ATOM | 542 | 2HG1 | ILE | A | 46 | 26.142 | -10.659 | -2.936  | 1.00 | 11.13 |
| ATOM | 543 | 3HG1 | ILE | A | 46 | 27.874 | -10.380 | -3.077  | 1.00 | 61.43 |
| ATOM | 544 | 1HG2 | ILE | A | 46 | 29.028 | -11.730 | -4.646  | 1.00 | 12.54 |
| ATOM | 545 | 2HG2 | ILE | A | 46 | 29.151 | -13.308 | -3.870  | 1.00 | 2.30  |
| ATOM | 546 | 3HG2 | ILE | A | 46 | 28.233 | -13.130 | -5.365  | 1.00 | 10.21 |
| ATOM | 547 | 1HD1 | ILE | A | 46 | 26.804 | -10.940 | -5.660  | 1.00 | 13.35 |
| ATOM | 548 | 2HD1 | ILE | A | 46 | 25.848 | -9.674  | -4.886  | 1.00 | 64.43 |
| ATOM | 549 | 3HD1 | ILE | A | 46 | 27.591 | -9.476  | -5.070  | 1.00 | 30.22 |
| ATOM | 550 | N    | GLN | A | 47 | 25.916 | -15.232 | -3.206  | 1.00 | 61.51 |
| ATOM | 551 | CA   | GLN | A | 47 | 26.098 | -16.676 | -3.111  | 1.00 | 4.02  |
| ATOM | 552 | C    | GLN | A | 47 | 25.354 | -17.394 | -4.232  | 1.00 | 10.13 |
| ATOM | 553 | O    | GLN | A | 47 | 25.731 | -18.493 | -4.636  | 1.00 | 21.45 |
| ATOM | 554 | CB   | GLN | A | 47 | 25.612 | -17.184 | -1.752  | 1.00 | 61.14 |
| ATOM | 555 | CG   | GLN | A | 47 | 26.731 | -17.393 | -0.745  | 1.00 | 10.43 |
| ATOM | 556 | CD   | GLN | A | 47 | 26.220 | -17.518 | 0.677   | 1.00 | 0.21  |
| ATOM | 557 | NE2  | GLN | A | 47 | 27.124 | -17.405 | 1.643   | 1.00 | 30.43 |
| ATOM | 558 | OE1  | GLN | A | 47 | 25.026 | -17.714 | 0.905   | 1.00 | 51.41 |
| ATOM | 559 | H    | GLN | A | 47 | 25.517 | -14.750 | -2.453  | 1.00 | 32.30 |
| ATOM | 560 | HA   | GLN | A | 47 | 27.153 | -16.884 | -3.206  | 1.00 | 4.33  |
| ATOM | 561 | 2HB  | GLN | A | 47 | 24.915 | -16.468 | -1.342  | 1.00 | 65.40 |
| ATOM | 562 | 3HB  | GLN | A | 47 | 25.105 | -18.127 | -1.895  | 1.00 | 22.13 |
| ATOM | 563 | 2HG  | GLN | A | 47 | 27.264 | -18.296 | -1.000  | 1.00 | 22.44 |
| ATOM | 564 | 3HG  | GLN | A | 47 | 27.406 | -16.551 | -0.797  | 1.00 | 31.03 |
| ATOM | 565 | 1HE2 | GLN | A | 47 | 28.057 | -17.249 | 1.387   | 1.00 | 5.42  |
| ATOM | 566 | 2HE2 | GLN | A | 47 | 26.821 | -17.481 | 2.571   | 1.00 | 24.44 |
| ATOM | 567 | N    | ALA | A | 48 | 24.295 | -16.765 | -4.730  | 1.00 | 13.53 |
| ATOM | 568 | CA   | ALA | A | 48 | 23.498 | -17.343 | -5.805  | 1.00 | 44.40 |
| ATOM | 569 | C    | ALA | A | 48 | 23.997 | -16.876 | -7.169  | 1.00 | 32.52 |
| ATOM | 570 | O    | ALA | A | 48 | 24.996 | -16.165 | -7.266  | 1.00 | 14.15 |
| ATOM | 571 | CB   | ALA | A | 48 | 22.031 | -16.984 | -5.626  | 1.00 | 54.34 |
| ATOM | 572 | H    | ALA | A | 48 | 24.044 | -15.890 | -4.366  | 1.00 | 52.01 |
| ATOM | 573 | HA   | ALA | A | 48 | 23.590 | -18.418 | -5.748  | 1.00 | 3.34  |
| ATOM | 574 | 1HB  | ALA | A | 48 | 21.881 | -16.565 | -4.642  | 1.00 | 35.44 |
| ATOM | 575 | 2HB  | ALA | A | 48 | 21.744 | -16.259 | -6.373  | 1.00 | 40.35 |
| ATOM | 576 | 3HB  | ALA | A | 48 | 21.427 | -17.872 | -5.736  | 1.00 | 62.31 |
| ATOM | 577 | N    | GLY | A | 49 | 23.294 | -17.283 | -8.222  | 1.00 | 31.44 |
| ATOM | 578 | CA   | GLY | A | 49 | 23.681 | -16.898 | -9.566  | 1.00 | 63.30 |
| ATOM | 579 | C    | GLY | A | 49 | 23.655 | -15.396 | -9.769  | 1.00 | 64.30 |
| ATOM | 580 | O    | GLY | A | 49 | 22.639 | -14.835 | -10.181 | 1.00 | 20.31 |
| ATOM | 581 | H    | GLY | A | 49 | 22.506 | -17.850 | -8.084  | 1.00 | 52.11 |
| ATOM | 582 | 2HA  | GLY | A | 49 | 24.680 | -17.260 | -9.759  | 1.00 | 22.04 |
| ATOM | 583 | 3HA  | GLY | A | 49 | 23.001 | -17.357 | -10.269 | 1.00 | 45.54 |
| ATOM | 584 | N    | LEU | A | 50 | 24.775 | -14.742 | -9.478  | 1.00 | 75.43 |
| ATOM | 585 | CA   | LEU | A | 50 | 24.876 | -13.295 | -9.630  | 1.00 | 2.03  |
| ATOM | 586 | C    | LEU | A | 50 | 26.335 | -12.848 | -9.624  | 1.00 | 74.12 |
| ATOM | 587 | O    | LEU | A | 50 | 27.030 | -12.977 | -8.616  | 1.00 | 52.43 |
| ATOM | 588 | CB   | LEU | A | 50 | 24.111 | -12.590 | -8.509  | 1.00 | 34.14 |
| ATOM | 589 | CG   | LEU | A | 50 | 24.658 | -11.230 | -8.074  | 1.00 | 70.02 |
| ATOM | 590 | CD1  | LEU | A | 50 | 24.678 | -10.263 | -9.248  | 1.00 | 25.30 |
| ATOM | 591 | CD2  | LEU | A | 50 | 23.832 | -10.664 | -6.929  | 1.00 | 15.32 |
| ATOM | 592 | H    | LEU | A | 50 | 25.551 | -15.244 | -9.154  | 1.00 | 43.43 |
| ATOM | 593 | HA   | LEU | A | 50 | 24.434 | -13.029 | -10.579 | 1.00 | 25.44 |
| ATOM | 594 | 2HB  | LEU | A | 50 | 23.094 | -12.446 | -8.842  | 1.00 | 65.11 |
| ATOM | 595 | 3HB  | LEU | A | 50 | 24.116 | -13.241 | -7.646  | 1.00 | 12.02 |
| ATOM | 596 | HG   | LEU | A | 50 | 25.674 | -11.353 | -7.726  | 1.00 | 3.42  |
| ATOM | 597 | 1HD1 | LEU | A | 50 | 24.011 | -9.439  | -9.047  | 1.00 | 60.11 |
| ATOM | 598 | 2HD1 | LEU | A | 50 | 24.358 | -10.776 | -10.143 | 1.00 | 20.54 |
| ATOM | 599 | 3HD1 | LEU | A | 50 | 25.682 | -9.889  | -9.388  | 1.00 | 41.12 |

|      |     |      |     |   |    |        |         |         |      |       |
|------|-----|------|-----|---|----|--------|---------|---------|------|-------|
| ATOM | 600 | 1HD2 | LEU | A | 50 | 24.078 | -11.185 | -6.016  | 1.00 | 1.04  |
| ATOM | 601 | 2HD2 | LEU | A | 50 | 22.781 | -10.793 | -7.145  | 1.00 | 32.43 |
| ATOM | 602 | 3HD2 | LEU | A | 50 | 24.049 | -9.612  | -6.814  | 1.00 | 31.34 |
| ATOM | 603 | N    | ASP | A | 51 | 26.791 | -12.321 | -10.755 | 1.00 | 74.11 |
| ATOM | 604 | CA   | ASP | A | 51 | 28.166 | -11.852 | -10.880 | 1.00 | 14.51 |
| ATOM | 605 | C    | ASP | A | 51 | 28.303 | -10.427 | -10.353 | 1.00 | 2.41  |
| ATOM | 606 | O    | ASP | A | 51 | 28.310 | -9.889  | -9.336  | 1.00 | 22.02 |
| ATOM | 607 | CB   | ASP | A | 51 | 28.618 | -11.915 | -12.340 | 1.00 | 1.44  |
| ATOM | 608 | CG   | ASP | A | 51 | 28.719 | -13.337 | -12.853 | 1.00 | 65.34 |
| ATOM | 609 | OD1  | ASP | A | 51 | 29.095 | -13.518 | -14.031 | 1.00 | 1.02  |
| ATOM | 610 | OD2  | ASP | A | 51 | 28.424 | -14.270 | -12.078 | 1.00 | 21.12 |
| ATOM | 611 | H    | ASP | A | 51 | 26.188 | -12.245 | -11.524 | 1.00 | 73.34 |
| ATOM | 612 | HA   | ASP | A | 51 | 28.793 | -12.502 | -10.290 | 1.00 | 21.21 |
| ATOM | 613 | 2HB  | ASP | A | 51 | 27.908 | -11.380 | -12.953 | 1.00 | 53.14 |
| ATOM | 614 | 3HB  | ASP | A | 51 | 29.588 | -11.448 | -12.429 | 1.00 | 61.14 |
| ATOM | 615 | N    | SPS | A | 52 | 28.501 | -9.275  | -11.461 | 1.00 | 35.03 |
| ATOM | 616 | CA   | SPS | A | 52 | 28.691 | -7.873  | -11.083 | 1.00 | 3.41  |
| ATOM | 617 | CAA  | SPS | A | 52 | 31.096 | -9.682  | -8.582  | 1.00 | 3.11  |
| ATOM | 618 | C    | SPS | A | 52 | 27.820 | -6.997  | -11.946 | 1.00 | 45.25 |
| ATOM | 619 | O    | SPS | A | 52 | 27.298 | -6.022  | -11.405 | 1.00 | 51.25 |
| ATOM | 620 | CB   | SPS | A | 52 | 30.159 | -7.486  | -11.282 | 1.00 | 13.43 |
| ATOM | 621 | OG   | SPS | A | 52 | 30.337 | -6.954  | -12.595 | 1.00 | 62.15 |
| ATOM | 622 | CZ1  | SPS | A | 52 | 31.275 | -10.707 | -7.674  | 1.00 | 62.42 |
| ATOM | 623 | CZ2  | SPS | A | 52 | 31.567 | -8.410  | -8.303  | 1.00 | 44.43 |
| ATOM | 624 | OZ   | SPS | A | 52 | 32.105 | -11.475 | -5.582  | 1.00 | 51.55 |
| ATOM | 625 | CJ   | SPS | A | 52 | 31.914 | -4.743  | -11.372 | 1.00 | 41.05 |
| ATOM | 626 | CK   | SPS | A | 52 | 32.566 | -3.958  | -10.233 | 1.00 | 5.00  |
| ATOM | 627 | CL1  | SPS | A | 52 | 32.858 | -4.902  | -9.065  | 1.00 | 23.52 |
| ATOM | 628 | CL2  | SPS | A | 52 | 31.619 | -2.850  | -9.768  | 1.00 | 43.11 |
| ATOM | 629 | CL3  | SPS | A | 52 | 33.875 | -3.336  | -10.725 | 1.00 | 72.24 |
| ATOM | 630 | CM   | SPS | A | 52 | 34.422 | -2.413  | -9.668  | 1.00 | 42.01 |
| ATOM | 631 | OM   | SPS | A | 52 | 33.630 | -2.596  | -11.923 | 1.00 | 75.41 |
| ATOM | 632 | NN   | SPS | A | 52 | 35.125 | -2.915  | -8.633  | 1.00 | 73.20 |
| ATOM | 633 | ON   | SPS | A | 52 | 34.229 | -1.218  | -9.747  | 1.00 | 63.33 |
| ATOM | 634 | P    | SPS | A | 52 | 31.919 | -6.729  | -12.794 | 1.00 | 44.32 |
| ATOM | 635 | O1P  | SPS | A | 52 | 32.171 | -5.783  | -14.073 | 1.00 | 71.41 |
| ATOM | 636 | O2P  | SPS | A | 52 | 32.581 | -8.035  | -13.009 | 1.00 | 42.22 |
| ATOM | 637 | O3P  | SPS | A | 52 | 32.531 | -6.027  | -11.480 | 1.00 | 50.13 |
| ATOM | 638 | CX   | SPS | A | 52 | 32.406 | -9.182  | -6.190  | 1.00 | 2.15  |
| ATOM | 639 | CO   | SPS | A | 52 | 35.580 | -2.029  | -7.559  | 1.00 | 73.32 |
| ATOM | 640 | CP   | SPS | A | 52 | 36.299 | -2.854  | -6.489  | 1.00 | 34.22 |
| ATOM | 641 | CQ   | SPS | A | 52 | 35.294 | -3.698  | -5.746  | 1.00 | 13.30 |
| ATOM | 642 | CS   | SPS | A | 52 | 34.726 | -5.337  | -4.036  | 1.00 | 65.31 |
| ATOM | 643 | CT   | SPS | A | 52 | 34.137 | -6.383  | -4.985  | 1.00 | 20.22 |
| ATOM | 644 | CV   | SPS | A | 52 | 33.102 | -8.916  | -4.916  | 1.00 | 4.10  |
| ATOM | 645 | CY1  | SPS | A | 52 | 31.928 | -10.468 | -6.475  | 1.00 | 23.12 |
| ATOM | 646 | CY2  | SPS | A | 52 | 32.214 | -8.153  | -7.113  | 1.00 | 15.42 |
| ATOM | 647 | NR   | SPS | A | 52 | 35.702 | -4.518  | -4.757  | 1.00 | 61.25 |
| ATOM | 648 | OR   | SPS | A | 52 | 34.118 | -3.638  | -6.038  | 1.00 | 63.32 |
| ATOM | 649 | OW   | SPS | A | 52 | 33.820 | -9.766  | -4.425  | 1.00 | 0.33  |
| ATOM | 650 | SU   | SPS | A | 52 | 32.896 | -7.364  | -4.107  | 1.00 | 33.12 |
| ATOM | 651 | H    | SPS | A | 52 | 28.522 | -9.532  | -12.397 | 1.00 | 21.24 |
| ATOM | 652 | HN   | SPS | A | 52 | 35.328 | -3.863  | -8.600  | 1.00 | 42.31 |
| ATOM | 653 | HA   | SPS | A | 52 | 28.418 | -7.738  | -10.036 | 1.00 | 50.33 |
| ATOM | 654 | HAA  | SPS | A | 52 | 30.586 | -9.874  | -9.515  | 1.00 | 25.22 |
| ATOM | 655 | 2HB  | SPS | A | 52 | 30.440 | -6.735  | -10.544 | 1.00 | 14.32 |
| ATOM | 656 | 3HB  | SPS | A | 52 | 30.787 | -8.369  | -11.158 | 1.00 | 32.11 |
| ATOM | 657 | HZ   | SPS | A | 52 | 32.722 | -12.100 | -5.986  | 1.00 | 3.14  |
| ATOM | 658 | HZ1  | SPS | A | 52 | 30.905 | -11.697 | -7.900  | 1.00 | 3.23  |

|      |     |      |     |   |    |        |         |         |      |       |
|------|-----|------|-----|---|----|--------|---------|---------|------|-------|
| ATOM | 659 | HZ2  | SPS | A | 52 | 31.424 | -7.615  | -9.019  | 1.00 | 52.34 |
| ATOM | 660 | 2HJ  | SPS | A | 52 | 32.041 | -4.198  | -12.308 | 1.00 | 24.54 |
| ATOM | 661 | 3HJ  | SPS | A | 52 | 30.851 | -4.867  | -11.165 | 1.00 | 73.02 |
| ATOM | 662 | 1HL1 | SPS | A | 52 | 32.285 | -5.821  | -9.189  | 1.00 | 33.23 |
| ATOM | 663 | 2HL1 | SPS | A | 52 | 33.922 | -5.139  | -9.046  | 1.00 | 24.21 |
| ATOM | 664 | 3HL1 | SPS | A | 52 | 32.576 | -4.421  | -8.129  | 1.00 | 60.43 |
| ATOM | 665 | 1HL2 | SPS | A | 52 | 32.089 | -2.284  | -8.964  | 1.00 | 64.21 |
| ATOM | 666 | 2HL2 | SPS | A | 52 | 31.402 | -2.183  | -10.603 | 1.00 | 23.21 |
| ATOM | 667 | 3HL2 | SPS | A | 52 | 30.692 | -3.293  | -9.406  | 1.00 | 41.15 |
| ATOM | 668 | HL3  | SPS | A | 52 | 34.599 | -4.125  | -10.929 | 1.00 | 60.51 |
| ATOM | 669 | HM   | SPS | A | 52 | 32.985 | -1.909  | -11.700 | 1.00 | 62.24 |
| ATOM | 670 | 2HO  | SPS | A | 52 | 36.265 | -1.287  | -7.966  | 1.00 | 31.00 |
| ATOM | 671 | 3HO  | SPS | A | 52 | 34.721 | -1.527  | -7.114  | 1.00 | 13.44 |
| ATOM | 672 | 2HP  | SPS | A | 52 | 37.037 | -3.501  | -6.963  | 1.00 | 74.53 |
| ATOM | 673 | 3HP  | SPS | A | 52 | 36.799 | -2.185  | -5.789  | 1.00 | 54.45 |
| ATOM | 674 | HR   | SPS | A | 52 | 36.643 | -4.565  | -4.524  | 1.00 | 42.43 |
| ATOM | 675 | 2HS  | SPS | A | 52 | 35.219 | -5.839  | -3.203  | 1.00 | 33.34 |
| ATOM | 676 | 3HS  | SPS | A | 52 | 33.928 | -4.701  | -3.656  | 1.00 | 53.23 |
| ATOM | 677 | 2HT  | SPS | A | 52 | 33.671 | -5.882  | -5.833  | 1.00 | 22.20 |
| ATOM | 678 | 3HT  | SPS | A | 52 | 34.932 | -7.038  | -5.342  | 1.00 | 14.12 |
| ATOM | 679 | HY2  | SPS | A | 52 | 32.579 | -7.159  | -6.900  | 1.00 | 53.21 |
| ATOM | 680 | N    | ILE | A | 53 | 27.646 | -7.292  | -13.230 | 1.00 | 63.31 |
| ATOM | 681 | CA   | ILE | A | 53 | 26.811 | -6.470  | -14.096 | 1.00 | 40.33 |
| ATOM | 682 | C    | ILE | A | 53 | 25.379 | -6.404  | -13.578 | 1.00 | 35.13 |
| ATOM | 683 | O    | ILE | A | 53 | 24.688 | -5.401  | -13.758 | 1.00 | 74.21 |
| ATOM | 684 | CB   | ILE | A | 53 | 26.798 | -7.006  | -15.540 | 1.00 | 43.42 |
| ATOM | 685 | CG1  | ILE | A | 53 | 26.853 | -5.847  | -16.538 | 1.00 | 11.21 |
| ATOM | 686 | CG2  | ILE | A | 53 | 25.561 | -7.858  | -15.778 | 1.00 | 20.43 |
| ATOM | 687 | CD1  | ILE | A | 53 | 25.789 | -4.798  | -16.304 | 1.00 | 54.51 |
| ATOM | 688 | H    | ILE | A | 53 | 28.089 | -8.082  | -13.603 | 1.00 | 62.52 |
| ATOM | 689 | HA   | ILE | A | 53 | 27.225 | -5.472  | -14.108 | 1.00 | 14.44 |
| ATOM | 690 | HB   | ILE | A | 53 | 27.668 | -7.630  | -15.676 | 1.00 | 50.15 |
| ATOM | 691 | 2HG1 | ILE | A | 53 | 27.815 | -5.364  | -16.467 | 1.00 | 73.13 |
| ATOM | 692 | 3HG1 | ILE | A | 53 | 26.722 | -6.236  | -17.537 | 1.00 | 44.04 |
| ATOM | 693 | 1HG2 | ILE | A | 53 | 25.644 | -8.354  | -16.734 | 1.00 | 31.44 |
| ATOM | 694 | 2HG2 | ILE | A | 53 | 25.479 | -8.598  | -14.996 | 1.00 | 34.04 |
| ATOM | 695 | 3HG2 | ILE | A | 53 | 24.684 | -7.230  | -15.773 | 1.00 | 54.53 |
| ATOM | 696 | 1HD1 | ILE | A | 53 | 24.857 | -5.280  | -16.047 | 1.00 | 3.14  |
| ATOM | 697 | 2HD1 | ILE | A | 53 | 26.094 | -4.148  | -15.498 | 1.00 | 12.12 |
| ATOM | 698 | 3HD1 | ILE | A | 53 | 25.654 | -4.215  | -17.204 | 1.00 | 41.23 |
| ATOM | 699 | N    | ARG | A | 54 | 24.939 | -7.479  | -12.931 | 1.00 | 62.03 |
| ATOM | 700 | CA   | ARG | A | 54 | 23.589 | -7.543  | -12.385 | 1.00 | 71.55 |
| ATOM | 701 | C    | ARG | A | 54 | 23.398 | -6.506  | -11.283 | 1.00 | 21.22 |
| ATOM | 702 | O    | ARG | A | 54 | 22.344 | -5.877  | -11.183 | 1.00 | 41.54 |
| ATOM | 703 | CB   | ARG | A | 54 | 23.303 | -8.943  | -11.838 | 1.00 | 63.35 |
| ATOM | 704 | CG   | ARG | A | 54 | 22.482 | -9.809  | -12.780 | 1.00 | 31.13 |
| ATOM | 705 | CD   | ARG | A | 54 | 23.260 | -10.156 | -14.039 | 1.00 | 62.31 |
| ATOM | 706 | NE   | ARG | A | 54 | 22.418 | -10.802 | -15.043 | 1.00 | 11.34 |
| ATOM | 707 | CZ   | ARG | A | 54 | 22.893 | -11.367 | -16.147 | 1.00 | 34.43 |
| ATOM | 708 | NH1  | ARG | A | 54 | 24.196 | -11.368 | -16.388 | 1.00 | 4.34  |
| ATOM | 709 | NH2  | ARG | A | 54 | 22.062 | -11.935 | -17.012 | 1.00 | 45.04 |
| ATOM | 710 | H    | ARG | A | 54 | 25.537 | -8.248  | -12.819 | 1.00 | 41.54 |
| ATOM | 711 | HA   | ARG | A | 54 | 22.897 | -7.332  | -13.186 | 1.00 | 54.54 |
| ATOM | 712 | 2HB  | ARG | A | 54 | 24.243 | -9.443  | -11.653 | 1.00 | 34.33 |
| ATOM | 713 | 3HB  | ARG | A | 54 | 22.764 | -8.850  | -10.908 | 1.00 | 4.32  |
| ATOM | 714 | 2HG  | ARG | A | 54 | 22.215 | -10.724 | -12.272 | 1.00 | 13.05 |
| ATOM | 715 | 3HG  | ARG | A | 54 | 21.586 | -9.274  | -13.056 | 1.00 | 50.33 |
| ATOM | 716 | 2HD  | ARG | A | 54 | 23.668 | -9.248  | -14.456 | 1.00 | 41.32 |
| ATOM | 717 | 3HD  | ARG | A | 54 | 24.066 | -10.824 | -13.775 | 1.00 | 62.51 |

|      |     |      |     |   |    |        |         |         |      |       |
|------|-----|------|-----|---|----|--------|---------|---------|------|-------|
| ATOM | 718 | HE   | ARG | A | 54 | 21.451 | -10.813 | -14.885 | 1.00 | 3.15  |
| ATOM | 719 | 1HH1 | ARG | A | 54 | 24.824 | -10.942 | -15.737 | 1.00 | 3.25  |
| ATOM | 720 | 2HH1 | ARG | A | 54 | 24.551 | -11.796 | -17.219 | 1.00 | 44.52 |
| ATOM | 721 | 1HH2 | ARG | A | 54 | 21.079 | -11.937 | -16.834 | 1.00 | 50.11 |
| ATOM | 722 | 2HH2 | ARG | A | 54 | 22.421 | -12.360 | -17.843 | 1.00 | 35.30 |
| ATOM | 723 | N    | LEU | A | 55 | 24.424 | -6.334  | -10.456 | 1.00 | 53.32 |
| ATOM | 724 | CA   | LEU | A | 55 | 24.369 | -5.373  | -9.360  | 1.00 | 25.03 |
| ATOM | 725 | C    | LEU | A | 55 | 24.405 | -3.942  | -9.887  | 1.00 | 71.21 |
| ATOM | 726 | O    | LEU | A | 55 | 23.816 | -3.038  | -9.296  | 1.00 | 2.32  |
| ATOM | 727 | CB   | LEU | A | 55 | 25.535 | -5.603  | -8.396  | 1.00 | 43.43 |
| ATOM | 728 | CG   | LEU | A | 55 | 25.332 | -6.694  | -7.344  | 1.00 | 52.45 |
| ATOM | 729 | CD1  | LEU | A | 55 | 26.661 | -7.334  | -6.976  | 1.00 | 71.52 |
| ATOM | 730 | CD2  | LEU | A | 55 | 24.652 | -6.123  | -6.108  | 1.00 | 43.44 |
| ATOM | 731 | H    | LEU | A | 55 | 25.237 | -6.864  | -10.585 | 1.00 | 70.34 |
| ATOM | 732 | HA   | LEU | A | 55 | 23.441 | -5.526  | -8.831  | 1.00 | 35.11 |
| ATOM | 733 | 2HB  | LEU | A | 55 | 26.402 | -5.867  | -8.983  | 1.00 | 13.41 |
| ATOM | 734 | 3HB  | LEU | A | 55 | 25.723 | -4.673  | -7.878  | 1.00 | 40.22 |
| ATOM | 735 | HG   | LEU | A | 55 | 24.692 | -7.464  | -7.753  | 1.00 | 63.00 |
| ATOM | 736 | 1HD1 | LEU | A | 55 | 26.904 | -7.095  | -5.952  | 1.00 | 63.32 |
| ATOM | 737 | 2HD1 | LEU | A | 55 | 27.435 | -6.957  | -7.628  | 1.00 | 21.41 |
| ATOM | 738 | 3HD1 | LEU | A | 55 | 26.587 | -8.406  | -7.089  | 1.00 | 31.34 |
| ATOM | 739 | 1HD2 | LEU | A | 55 | 25.403 | -5.778  | -5.413  | 1.00 | 11.44 |
| ATOM | 740 | 2HD2 | LEU | A | 55 | 24.053 | -6.890  | -5.640  | 1.00 | 63.30 |
| ATOM | 741 | 3HD2 | LEU | A | 55 | 24.019 | -5.296  | -6.395  | 1.00 | 65.10 |
| ATOM | 742 | N    | MET | A | 56 | 25.098 | -3.746  | -11.004 | 1.00 | 53.22 |
| ATOM | 743 | CA   | MET | A | 56 | 25.207 | -2.425  | -11.613 | 1.00 | 74.22 |
| ATOM | 744 | C    | MET | A | 56 | 23.893 | -2.022  | -12.275 | 1.00 | 13.43 |
| ATOM | 745 | O    | MET | A | 56 | 23.535 | -0.844  | -12.299 | 1.00 | 4.31  |
| ATOM | 746 | CB   | MET | A | 56 | 26.337 | -2.407  | -12.644 | 1.00 | 72.10 |
| ATOM | 747 | CG   | MET | A | 56 | 27.662 | -1.915  | -12.085 | 1.00 | 13.43 |
| ATOM | 748 | SD   | MET | A | 56 | 28.594 | -3.218  | -11.258 | 1.00 | 41.21 |
| ATOM | 749 | CE   | MET | A | 56 | 27.796 | -3.240  | -9.655  | 1.00 | 23.03 |
| ATOM | 750 | H    | MET | A | 56 | 25.546 | -4.506  | -11.430 | 1.00 | 33.50 |
| ATOM | 751 | HA   | MET | A | 56 | 25.434 | -1.717  | -10.830 | 1.00 | 62.53 |
| ATOM | 752 | 2HB  | MET | A | 56 | 26.480 | -3.409  | -13.021 | 1.00 | 40.44 |
| ATOM | 753 | 3HB  | MET | A | 56 | 26.053 | -1.760  | -13.461 | 1.00 | 23.22 |
| ATOM | 754 | 2HG  | MET | A | 56 | 28.258 | -1.525  | -12.896 | 1.00 | 71.24 |
| ATOM | 755 | 3HG  | MET | A | 56 | 27.465 | -1.125  | -11.375 | 1.00 | 21.05 |
| ATOM | 756 | 1HE  | MET | A | 56 | 28.486 | -2.883  | -8.904  | 1.00 | 51.23 |
| ATOM | 757 | 2HE  | MET | A | 56 | 26.926 | -2.601  | -9.677  | 1.00 | 71.32 |
| ATOM | 758 | 3HE  | MET | A | 56 | 27.496 | -4.250  | -9.416  | 1.00 | 63.33 |
| ATOM | 759 | N    | ARG | A | 57 | 23.178 | -3.006  | -12.810 | 1.00 | 43.25 |
| ATOM | 760 | CA   | ARG | A | 57 | 21.905 | -2.752  | -13.474 | 1.00 | 31.24 |
| ATOM | 761 | C    | ARG | A | 57 | 20.906 | -2.119  | -12.509 | 1.00 | 22.40 |
| ATOM | 762 | O    | ARG | A | 57 | 20.299 | -1.093  | -12.814 | 1.00 | 12.00 |
| ATOM | 763 | CB   | ARG | A | 57 | 21.331 | -4.053  | -14.038 | 1.00 | 22.34 |
| ATOM | 764 | CG   | ARG | A | 57 | 20.587 | -3.872  | -15.350 | 1.00 | 73.13 |
| ATOM | 765 | CD   | ARG | A | 57 | 19.080 | -3.913  | -15.146 | 1.00 | 43.35 |
| ATOM | 766 | NE   | ARG | A | 57 | 18.354 | -3.521  | -16.352 | 1.00 | 1.14  |
| ATOM | 767 | CZ   | ARG | A | 57 | 18.205 | -4.311  | -17.409 | 1.00 | 41.32 |
| ATOM | 768 | NH1  | ARG | A | 57 | 18.729 | -5.529  | -17.410 | 1.00 | 52.21 |
| ATOM | 769 | NH2  | ARG | A | 57 | 17.531 | -3.883  | -18.469 | 1.00 | 14.44 |
| ATOM | 770 | H    | ARG | A | 57 | 23.516 | -3.925  | -12.759 | 1.00 | 53.44 |
| ATOM | 771 | HA   | ARG | A | 57 | 22.085 | -2.066  | -14.288 | 1.00 | 24.15 |
| ATOM | 772 | 2HB  | ARG | A | 57 | 22.141 | -4.749  | -14.202 | 1.00 | 30.02 |
| ATOM | 773 | 3HB  | ARG | A | 57 | 20.647 | -4.473  | -13.316 | 1.00 | 22.41 |
| ATOM | 774 | 2HG  | ARG | A | 57 | 20.855 | -2.917  | -15.777 | 1.00 | 43.10 |
| ATOM | 775 | 3HG  | ARG | A | 57 | 20.871 | -4.664  | -16.027 | 1.00 | 4.11  |
| ATOM | 776 | 2HD  | ARG | A | 57 | 18.794 | -4.918  | -14.876 | 1.00 | 71.13 |

|      |     |      |     |   |    |        |        |         |      |       |
|------|-----|------|-----|---|----|--------|--------|---------|------|-------|
| ATOM | 777 | 3HD  | ARG | A | 57 | 18.821 | -3.237 | -14.345 | 1.00 | 72.12 |
| ATOM | 778 | HE   | ARG | A | 57 | 17.959 | -2.625 | -16.372 | 1.00 | 40.22 |
| ATOM | 779 | 1HH1 | ARG | A | 57 | 19.237 | -5.854 | -16.613 | 1.00 | 34.42 |
| ATOM | 780 | 2HH1 | ARG | A | 57 | 18.614 | -6.122 | -18.207 | 1.00 | 41.03 |
| ATOM | 781 | 1HH2 | ARG | A | 57 | 17.134 | -2.965 | -18.471 | 1.00 | 63.15 |
| ATOM | 782 | 2HH2 | ARG | A | 57 | 17.419 | -4.478 | -19.264 | 1.00 | 2.50  |
| ATOM | 783 | N    | TRP | A | 58 | 20.742 | -2.739 | -11.346 | 1.00 | 14.21 |
| ATOM | 784 | CA   | TRP | A | 58 | 19.816 | -2.236 | -10.337 | 1.00 | 30.42 |
| ATOM | 785 | C    | TRP | A | 58 | 20.120 | -0.782 | -9.995  | 1.00 | 50.24 |
| ATOM | 786 | O    | TRP | A | 58 | 19.222 | 0.061  | -9.971  | 1.00 | 2.23  |
| ATOM | 787 | CB   | TRP | A | 58 | 19.890 | -3.096 | -9.074  | 1.00 | 3.11  |
| ATOM | 788 | CG   | TRP | A | 58 | 19.810 | -4.567 | -9.351  | 1.00 | 14.33 |
| ATOM | 789 | CD1  | TRP | A | 58 | 20.669 | -5.532 | -8.910  | 1.00 | 21.12 |
| ATOM | 790 | CD2  | TRP | A | 58 | 18.816 | -5.238 | -10.133 | 1.00 | 31.23 |
| ATOM | 791 | CE2  | TRP | A | 58 | 19.135 | -6.610 | -10.122 | 1.00 | 73.33 |
| ATOM | 792 | CE3  | TRP | A | 58 | 17.687 | -4.815 | -10.839 | 1.00 | 12.43 |
| ATOM | 793 | NE1  | TRP | A | 58 | 20.269 | -6.763 | -9.371  | 1.00 | 25.45 |
| ATOM | 794 | CZ2  | TRP | A | 58 | 18.365 | -7.558 | -10.792 | 1.00 | 22.13 |
| ATOM | 795 | CZ3  | TRP | A | 58 | 16.924 | -5.756 | -11.503 | 1.00 | 23.52 |
| ATOM | 796 | CH2  | TRP | A | 58 | 17.265 | -7.115 | -11.475 | 1.00 | 64.30 |
| ATOM | 797 | H    | TRP | A | 58 | 21.255 | -3.554 | -11.161 | 1.00 | 15.53 |
| ATOM | 798 | HA   | TRP | A | 58 | 18.818 | -2.297 | -10.745 | 1.00 | 34.25 |
| ATOM | 799 | 2HB  | TRP | A | 58 | 20.825 | -2.903 | -8.569  | 1.00 | 13.33 |
| ATOM | 800 | 3HB  | TRP | A | 58 | 19.071 | -2.834 | -8.420  | 1.00 | 51.52 |
| ATOM | 801 | HD1  | TRP | A | 58 | 21.533 | -5.341 | -8.292  | 1.00 | 0.41  |
| ATOM | 802 | HE1  | TRP | A | 58 | 20.723 | -7.613 | -9.188  | 1.00 | 60.34 |
| ATOM | 803 | HE3  | TRP | A | 58 | 17.408 | -3.772 | -10.872 | 1.00 | 15.22 |
| ATOM | 804 | HZ2  | TRP | A | 58 | 18.615 | -8.609 | -10.779 | 1.00 | 74.13 |
| ATOM | 805 | HZ3  | TRP | A | 58 | 16.048 | -5.448 | -12.054 | 1.00 | 43.42 |
| ATOM | 806 | HH2  | TRP | A | 58 | 16.641 | -7.816 | -12.008 | 1.00 | 43.42 |
| ATOM | 807 | N    | LEU | A | 59 | 21.390 | -0.493 | -9.733  | 1.00 | 32.43 |
| ATOM | 808 | CA   | LEU | A | 59 | 21.812 | 0.861  | -9.393  | 1.00 | 22.03 |
| ATOM | 809 | C    | LEU | A | 59 | 21.212 | 1.877  | -10.359 | 1.00 | 13.34 |
| ATOM | 810 | O    | LEU | A | 59 | 20.475 | 2.776  | -9.952  | 1.00 | 1.44  |
| ATOM | 811 | CB   | LEU | A | 59 | 23.338 | 0.961  | -9.413  | 1.00 | 65.44 |
| ATOM | 812 | CG   | LEU | A | 59 | 24.003 | 1.363  | -8.096  | 1.00 | 53.23 |
| ATOM | 813 | CD1  | LEU | A | 59 | 23.631 | 2.791  | -7.726  | 1.00 | 24.44 |
| ATOM | 814 | CD2  | LEU | A | 59 | 23.609 | 0.402  | -6.985  | 1.00 | 33.25 |
| ATOM | 815 | H    | LEU | A | 59 | 22.060 | -1.207 | -9.768  | 1.00 | 51.00 |
| ATOM | 816 | HA   | LEU | A | 59 | 21.459 | 1.078  | -8.396  | 1.00 | 32.44 |
| ATOM | 817 | 2HB  | LEU | A | 59 | 23.729 | -0.004 | -9.699  | 1.00 | 51.00 |
| ATOM | 818 | 3HB  | LEU | A | 59 | 23.611 | 1.693  | -10.160 | 1.00 | 61.11 |
| ATOM | 819 | HG   | LEU | A | 59 | 25.077 | 1.318  | -8.214  | 1.00 | 12.24 |
| ATOM | 820 | 1HD1 | LEU | A | 59 | 24.490 | 3.287  | -7.301  | 1.00 | 45.41 |
| ATOM | 821 | 2HD1 | LEU | A | 59 | 22.829 | 2.778  | -7.003  | 1.00 | 22.44 |
| ATOM | 822 | 3HD1 | LEU | A | 59 | 23.309 | 3.320  | -8.610  | 1.00 | 62.05 |
| ATOM | 823 | 1HD2 | LEU | A | 59 | 23.452 | -0.583 | -7.400  | 1.00 | 15.23 |
| ATOM | 824 | 2HD2 | LEU | A | 59 | 22.697 | 0.745  | -6.518  | 1.00 | 53.41 |
| ATOM | 825 | 3HD2 | LEU | A | 59 | 24.397 | 0.361  | -6.248  | 1.00 | 62.30 |
| ATOM | 826 | N    | HIS | A | 60 | 21.530 | 1.727  | -11.641 | 1.00 | 15.34 |
| ATOM | 827 | CA   | HIS | A | 60 | 21.019 | 2.631  | -12.666 | 1.00 | 31.43 |
| ATOM | 828 | C    | HIS | A | 60 | 19.517 | 2.440  | -12.858 | 1.00 | 44.35 |
| ATOM | 829 | O    | HIS | A | 60 | 18.842 | 3.295  | -13.432 | 1.00 | 5.54  |
| ATOM | 830 | CB   | HIS | A | 60 | 21.748 | 2.398  | -13.989 | 1.00 | 44.52 |
| ATOM | 831 | CG   | HIS | A | 60 | 21.190 | 3.194  | -15.129 | 1.00 | 34.14 |
| ATOM | 832 | CD2  | HIS | A | 60 | 20.882 | 2.830  | -16.396 | 1.00 | 10.05 |
| ATOM | 833 | ND1  | HIS | A | 60 | 20.885 | 4.535  | -15.032 | 1.00 | 50.31 |
| ATOM | 834 | CE1  | HIS | A | 60 | 20.413 | 4.962  | -16.190 | 1.00 | 34.33 |
| ATOM | 835 | NE2  | HIS | A | 60 | 20.401 | 3.946  | -17.034 | 1.00 | 51.34 |

|      |     |     |     |   |    |        |        |         |      |       |
|------|-----|-----|-----|---|----|--------|--------|---------|------|-------|
| ATOM | 836 | H   | HIS | A | 60 | 22.121 | 0.992  | -11.903 | 1.00 | 71.42 |
| ATOM | 837 | HA  | HIS | A | 60 | 21.201 | 3.642  | -12.337 | 1.00 | 4.42  |
| ATOM | 838 | 2HB | HIS | A | 60 | 22.787 | 2.671  | -13.873 | 1.00 | 11.22 |
| ATOM | 839 | 3HB | HIS | A | 60 | 21.683 | 1.352  | -14.250 | 1.00 | 51.03 |
| ATOM | 840 | HD1 | HIS | A | 60 | 20.997 | 5.091  | -14.233 | 1.00 | 52.44 |
| ATOM | 841 | HD2 | HIS | A | 60 | 20.993 | 1.844  | -16.825 | 1.00 | 44.22 |
| ATOM | 842 | HE1 | HIS | A | 60 | 20.091 | 5.969  | -16.409 | 1.00 | 60.22 |
| ATOM | 843 | N   | TRP | A | 61 | 19.002 | 1.315  | -12.377 | 1.00 | 64.24 |
| ATOM | 844 | CA  | TRP | A | 61 | 17.581 | 1.012  | -12.498 | 1.00 | 14.41 |
| ATOM | 845 | C   | TRP | A | 61 | 16.737 | 2.075  | -11.802 | 1.00 | 22.22 |
| ATOM | 846 | O   | TRP | A | 61 | 15.917 | 2.742  | -12.433 | 1.00 | 31.22 |
| ATOM | 847 | CB  | TRP | A | 61 | 17.279 | -0.365 | -11.905 | 1.00 | 1.10  |
| ATOM | 848 | CG  | TRP | A | 61 | 16.163 | -1.081 | -12.604 | 1.00 | 24.22 |
| ATOM | 849 | CD1 | TRP | A | 61 | 16.124 | -1.454 | -13.917 | 1.00 | 64.11 |
| ATOM | 850 | CD2 | TRP | A | 61 | 14.925 | -1.509 | -12.026 | 1.00 | 51.34 |
| ATOM | 851 | CE2 | TRP | A | 61 | 14.183 | -2.135 | -13.047 | 1.00 | 44.34 |
| ATOM | 852 | CE3 | TRP | A | 61 | 14.371 | -1.426 | -10.746 | 1.00 | 42.41 |
| ATOM | 853 | NE1 | TRP | A | 61 | 14.936 | -2.088 | -14.191 | 1.00 | 2.32  |
| ATOM | 854 | CZ2 | TRP | A | 61 | 12.918 | -2.672 | -12.826 | 1.00 | 1.14  |
| ATOM | 855 | CZ3 | TRP | A | 61 | 13.115 | -1.959 | -10.528 | 1.00 | 2.13  |
| ATOM | 856 | CH2 | TRP | A | 61 | 12.400 | -2.576 | -11.563 | 1.00 | 22.34 |
| ATOM | 857 | H   | TRP | A | 61 | 19.592 | 0.671  | -11.930 | 1.00 | 53.43 |
| ATOM | 858 | HA  | TRP | A | 61 | 17.332 | 1.004  | -13.549 | 1.00 | 64.00 |
| ATOM | 859 | 2HB | TRP | A | 61 | 18.164 | -0.980 | -11.972 | 1.00 | 33.32 |
| ATOM | 860 | 3HB | TRP | A | 61 | 17.003 | -0.249 | -10.867 | 1.00 | 2.03  |
| ATOM | 861 | HD1 | TRP | A | 61 | 16.918 | -1.270 | -14.625 | 1.00 | 54.42 |
| ATOM | 862 | HE1 | TRP | A | 61 | 14.672 | -2.449 | -15.063 | 1.00 | 41.22 |
| ATOM | 863 | HE3 | TRP | A | 61 | 14.907 | -0.954 | -9.936  | 1.00 | 13.35 |
| ATOM | 864 | HZ2 | TRP | A | 61 | 12.355 | -3.151 | -13.613 | 1.00 | 33.42 |
| ATOM | 865 | HZ3 | TRP | A | 61 | 12.671 | -1.904 | -9.545  | 1.00 | 11.43 |
| ATOM | 866 | HH2 | TRP | A | 61 | 11.423 | -2.979 | -11.347 | 1.00 | 13.24 |
| ATOM | 867 | N   | PHE | A | 62 | 16.944 | 2.228  | -10.498 | 1.00 | 72.20 |
| ATOM | 868 | CA  | PHE | A | 62 | 16.201 | 3.210  | -9.716  | 1.00 | 62.52 |
| ATOM | 869 | C   | PHE | A | 62 | 16.845 | 4.589  | -9.823  | 1.00 | 55.01 |
| ATOM | 870 | O   | PHE | A | 62 | 16.156 | 5.610  | -9.807  | 1.00 | 61.43 |
| ATOM | 871 | CB  | PHE | A | 62 | 16.132 | 2.779  | -8.250  | 1.00 | 24.43 |
| ATOM | 872 | CG  | PHE | A | 62 | 17.020 | 1.611  | -7.926  | 1.00 | 1.13  |
| ATOM | 873 | CD1 | PHE | A | 62 | 18.316 | 1.812  | -7.479  | 1.00 | 11.25 |
| ATOM | 874 | CD2 | PHE | A | 62 | 16.559 | 0.312  | -8.069  | 1.00 | 13.51 |
| ATOM | 875 | CE1 | PHE | A | 62 | 19.135 | 0.740  | -7.179  | 1.00 | 43.11 |
| ATOM | 876 | CE2 | PHE | A | 62 | 17.373 | -0.763 | -7.771  | 1.00 | 22.54 |
| ATOM | 877 | CZ  | PHE | A | 62 | 18.663 | -0.550 | -7.326  | 1.00 | 45.54 |
| ATOM | 878 | H   | PHE | A | 62 | 17.612 | 1.666  | -10.051 | 1.00 | 15.22 |
| ATOM | 879 | HA  | PHE | A | 62 | 15.200 | 3.261  | -10.115 | 1.00 | 32.41 |
| ATOM | 880 | 2HB | PHE | A | 62 | 16.432 | 3.606  | -7.624  | 1.00 | 41.03 |
| ATOM | 881 | 3HB | PHE | A | 62 | 15.117 | 2.501  | -8.011  | 1.00 | 12.41 |
| ATOM | 882 | HD1 | PHE | A | 62 | 18.686 | 2.821  | -7.363  | 1.00 | 43.32 |
| ATOM | 883 | HD2 | PHE | A | 62 | 15.550 | 0.143  | -8.417  | 1.00 | 44.42 |
| ATOM | 884 | HE1 | PHE | A | 62 | 20.144 | 0.911  | -6.832  | 1.00 | 54.21 |
| ATOM | 885 | HE2 | PHE | A | 62 | 17.002 | -1.771 | -7.887  | 1.00 | 1.21  |
| ATOM | 886 | HZ  | PHE | A | 62 | 19.302 | -1.388 | -7.092  | 1.00 | 74.54 |
| ATOM | 887 | N   | ARG | A | 63 | 18.169 | 4.611  | -9.931  | 1.00 | 71.11 |
| ATOM | 888 | CA  | ARG | A | 63 | 18.906 | 5.864  | -10.039 | 1.00 | 1.13  |
| ATOM | 889 | C   | ARG | A | 63 | 18.295 | 6.764  | -11.108 | 1.00 | 51.35 |
| ATOM | 890 | O   | ARG | A | 63 | 18.282 | 7.988  | -10.973 | 1.00 | 23.01 |
| ATOM | 891 | CB  | ARG | A | 63 | 20.375 | 5.590  | -10.366 | 1.00 | 61.11 |
| ATOM | 892 | CG  | ARG | A | 63 | 21.208 | 6.851  | -10.531 | 1.00 | 72.45 |
| ATOM | 893 | CD  | ARG | A | 63 | 21.149 | 7.724  | -9.288  | 1.00 | 40.21 |
| ATOM | 894 | NE  | ARG | A | 63 | 21.892 | 8.970  | -9.459  | 1.00 | 31.02 |

|      |     |      |     |   |    |        |        |         |      |       |
|------|-----|------|-----|---|----|--------|--------|---------|------|-------|
| ATOM | 895 | CZ   | ARG | A | 63 | 21.406 | 10.036 | -10.085 | 1.00 | 74.32 |
| ATOM | 896 | NH1  | ARG | A | 63 | 20.183 | 10.007 | -10.597 | 1.00 | 51.31 |
| ATOM | 897 | NH2  | ARG | A | 63 | 22.143 | 11.133 | -10.200 | 1.00 | 73.00 |
| ATOM | 898 | H    | ARG | A | 63 | 18.662 | 3.764  | -9.938  | 1.00 | 4.21  |
| ATOM | 899 | HA   | ARG | A | 63 | 18.847 | 6.367  | -9.085  | 1.00 | 72.11 |
| ATOM | 900 | 2HB  | ARG | A | 63 | 20.806 | 5.002  | -9.569  | 1.00 | 2.53  |
| ATOM | 901 | 3HB  | ARG | A | 63 | 20.427 | 5.027  | -11.286 | 1.00 | 22.13 |
| ATOM | 902 | 2HG  | ARG | A | 63 | 22.235 | 6.571  | -10.713 | 1.00 | 41.21 |
| ATOM | 903 | 3HG  | ARG | A | 63 | 20.831 | 7.412  | -11.374 | 1.00 | 31.34 |
| ATOM | 904 | 2HD  | ARG | A | 63 | 20.116 | 7.958  | -9.077  | 1.00 | 42.34 |
| ATOM | 905 | 3HD  | ARG | A | 63 | 21.570 | 7.175  | -8.459  | 1.00 | 51.40 |
| ATOM | 906 | HE   | ARG | A | 63 | 22.798 | 9.013  | -9.088  | 1.00 | 74.32 |
| ATOM | 907 | 1HH1 | ARG | A | 63 | 19.625 | 9.182  | -10.511 | 1.00 | 52.21 |
| ATOM | 908 | 2HH1 | ARG | A | 63 | 19.819 | 10.812 | -11.067 | 1.00 | 74.42 |
| ATOM | 909 | 1HH2 | ARG | A | 63 | 23.065 | 11.158 | -9.815  | 1.00 | 52.22 |
| ATOM | 910 | 2HH2 | ARG | A | 63 | 21.776 | 11.934 | -10.672 | 1.00 | 0.34  |
| ATOM | 911 | N    | LYS | A | 64 | 17.789 | 6.150  | -12.173 | 1.00 | 1.33  |
| ATOM | 912 | CA   | LYS | A | 64 | 17.175 | 6.894  | -13.266 | 1.00 | 44.32 |
| ATOM | 913 | C    | LYS | A | 64 | 16.038 | 7.773  | -12.755 | 1.00 | 40.14 |
| ATOM | 914 | O    | LYS | A | 64 | 15.815 | 8.872  | -13.262 | 1.00 | 30.23 |
| ATOM | 915 | CB   | LYS | A | 64 | 16.650 | 5.932  | -14.334 | 1.00 | 24.22 |
| ATOM | 916 | CG   | LYS | A | 64 | 17.346 | 6.075  | -15.676 | 1.00 | 60.45 |
| ATOM | 917 | CD   | LYS | A | 64 | 16.529 | 6.919  | -16.641 | 1.00 | 24.34 |
| ATOM | 918 | CE   | LYS | A | 64 | 15.418 | 6.107  | -17.288 | 1.00 | 13.11 |
| ATOM | 919 | NZ   | LYS | A | 64 | 14.289 | 6.970  | -17.735 | 1.00 | 45.03 |
| ATOM | 920 | H    | LYS | A | 64 | 17.829 | 5.172  | -12.223 | 1.00 | 73.34 |
| ATOM | 921 | HA   | LYS | A | 64 | 17.933 | 7.526  | -13.704 | 1.00 | 63.23 |
| ATOM | 922 | 2HB  | LYS | A | 64 | 16.788 | 4.918  | -13.987 | 1.00 | 13.44 |
| ATOM | 923 | 3HB  | LYS | A | 64 | 15.595 | 6.114  | -14.478 | 1.00 | 20.12 |
| ATOM | 924 | 2HG  | LYS | A | 64 | 18.306 | 6.546  | -15.526 | 1.00 | 52.23 |
| ATOM | 925 | 3HG  | LYS | A | 64 | 17.488 | 5.092  | -16.104 | 1.00 | 45.20 |
| ATOM | 926 | 2HD  | LYS | A | 64 | 16.089 | 7.743  | -16.100 | 1.00 | 4.40  |
| ATOM | 927 | 3HD  | LYS | A | 64 | 17.182 | 7.300  | -17.413 | 1.00 | 60.34 |
| ATOM | 928 | 2HE  | LYS | A | 64 | 15.821 | 5.585  | -18.142 | 1.00 | 42.40 |
| ATOM | 929 | 3HE  | LYS | A | 64 | 15.049 | 5.390  | -16.570 | 1.00 | 15.14 |
| ATOM | 930 | 1HZ  | LYS | A | 64 | 14.523 | 7.421  | -18.643 | 1.00 | 70.54 |
| ATOM | 931 | 2HZ  | LYS | A | 64 | 14.106 | 7.712  | -17.030 | 1.00 | 51.15 |
| ATOM | 932 | 3HZ  | LYS | A | 64 | 13.428 | 6.399  | -17.855 | 1.00 | 4.42  |
| ATOM | 933 | N    | ASN | A | 65 | 15.323 | 7.282  | -11.749 | 1.00 | 31.33 |
| ATOM | 934 | CA   | ASN | A | 65 | 14.209 | 8.023  | -11.169 | 1.00 | 0.41  |
| ATOM | 935 | C    | ASN | A | 65 | 14.712 | 9.101  | -10.212 | 1.00 | 72.55 |
| ATOM | 936 | O    | ASN | A | 65 | 14.031 | 10.095 | -9.968  | 1.00 | 14.33 |
| ATOM | 937 | CB   | ASN | A | 65 | 13.264 | 7.072  | -10.432 | 1.00 | 41.00 |
| ATOM | 938 | CG   | ASN | A | 65 | 13.142 | 5.728  | -11.124 | 1.00 | 30.14 |
| ATOM | 939 | ND2  | ASN | A | 65 | 12.761 | 5.750  | -12.396 | 1.00 | 22.44 |
| ATOM | 940 | OD1  | ASN | A | 65 | 13.387 | 4.683  | -10.521 | 1.00 | 64.20 |
| ATOM | 941 | H    | ASN | A | 65 | 15.549 | 6.399  | -11.387 | 1.00 | 40.41 |
| ATOM | 942 | HA   | ASN | A | 65 | 13.671 | 8.497  | -11.976 | 1.00 | 11.52 |
| ATOM | 943 | 2HB  | ASN | A | 65 | 13.637 | 6.908  | -9.431  | 1.00 | 60.54 |
| ATOM | 944 | 3HB  | ASN | A | 65 | 12.283 | 7.519  | -10.377 | 1.00 | 71.02 |
| ATOM | 945 | 1HD2 | ASN | A | 65 | 12.583 | 6.619  | -12.811 | 1.00 | 51.30 |
| ATOM | 946 | 2HD2 | ASN | A | 65 | 12.674 | 4.895  | -12.867 | 1.00 | 35.23 |
| ATOM | 947 | N    | GLY | A | 66 | 15.910 | 8.894  | -9.675  | 1.00 | 3.43  |
| ATOM | 948 | CA   | GLY | A | 66 | 16.485 | 9.856  | -8.752  | 1.00 | 34.12 |
| ATOM | 949 | C    | GLY | A | 66 | 16.915 | 9.220  | -7.445  | 1.00 | 62.42 |
| ATOM | 950 | O    | GLY | A | 66 | 16.845 | 9.847  | -6.388  | 1.00 | 53.02 |
| ATOM | 951 | H    | GLY | A | 66 | 16.409 | 8.083  | -9.907  | 1.00 | 35.34 |
| ATOM | 952 | 2HA  | GLY | A | 66 | 17.344 | 10.316 | -9.217  | 1.00 | 32.13 |
| ATOM | 953 | 3HA  | GLY | A | 66 | 15.750 | 10.619 | -8.542  | 1.00 | 13.22 |

|      |      |      |     |   |    |        |        |        |      |       |
|------|------|------|-----|---|----|--------|--------|--------|------|-------|
| ATOM | 954  | N    | TYR | A | 67 | 17.361 | 7.970  | -7.516 | 1.00 | 51.32 |
| ATOM | 955  | CA   | TYR | A | 67 | 17.801 | 7.247  | -6.329 | 1.00 | 14.01 |
| ATOM | 956  | C    | TYR | A | 67 | 19.313 | 7.044  | -6.344 | 1.00 | 35.43 |
| ATOM | 957  | O    | TYR | A | 67 | 19.826 | 6.172  | -7.046 | 1.00 | 0.42  |
| ATOM | 958  | CB   | TYR | A | 67 | 17.094 | 5.894  | -6.240 | 1.00 | 34.54 |
| ATOM | 959  | CG   | TYR | A | 67 | 15.602 | 6.003  | -6.018 | 1.00 | 51.04 |
| ATOM | 960  | CD1  | TYR | A | 67 | 14.703 | 5.534  | -6.969 | 1.00 | 12.15 |
| ATOM | 961  | CD2  | TYR | A | 67 | 15.091 | 6.576  | -4.860 | 1.00 | 44.13 |
| ATOM | 962  | CE1  | TYR | A | 67 | 13.339 | 5.633  | -6.771 | 1.00 | 70.43 |
| ATOM | 963  | CE2  | TYR | A | 67 | 13.729 | 6.677  | -4.654 | 1.00 | 2.41  |
| ATOM | 964  | CZ   | TYR | A | 67 | 12.857 | 6.204  | -5.612 | 1.00 | 42.53 |
| ATOM | 965  | OH   | TYR | A | 67 | 11.500 | 6.305  | -5.411 | 1.00 | 74.21 |
| ATOM | 966  | H    | TYR | A | 67 | 17.394 | 7.523  | -8.387 | 1.00 | 74.23 |
| ATOM | 967  | HA   | TYR | A | 67 | 17.537 | 7.838  | -5.464 | 1.00 | 34.31 |
| ATOM | 968  | 2HB  | TYR | A | 67 | 17.253 | 5.350  | -7.158 | 1.00 | 51.52 |
| ATOM | 969  | 3HB  | TYR | A | 67 | 17.511 | 5.331  | -5.417 | 1.00 | 72.23 |
| ATOM | 970  | HD1  | TYR | A | 67 | 15.083 | 5.087  | -7.875 | 1.00 | 62.44 |
| ATOM | 971  | HD2  | TYR | A | 67 | 15.777 | 6.946  | -4.112 | 1.00 | 23.11 |
| ATOM | 972  | HE1  | TYR | A | 67 | 12.656 | 5.262  | -7.521 | 1.00 | 53.23 |
| ATOM | 973  | HE2  | TYR | A | 67 | 13.352 | 7.126  | -3.747 | 1.00 | 33.43 |
| ATOM | 974  | HH   | TYR | A | 67 | 11.270 | 7.219  | -5.229 | 1.00 | 51.25 |
| ATOM | 975  | N    | ARG | A | 68 | 20.020 | 7.854  | -5.563 | 1.00 | 14.00 |
| ATOM | 976  | CA   | ARG | A | 68 | 21.473 | 7.765  | -5.486 | 1.00 | 33.43 |
| ATOM | 977  | C    | ARG | A | 68 | 21.902 | 6.899  | -4.305 | 1.00 | 21.40 |
| ATOM | 978  | O    | ARG | A | 68 | 21.649 | 7.238  | -3.148 | 1.00 | 60.41 |
| ATOM | 979  | CB   | ARG | A | 68 | 22.085 | 9.161  | -5.357 | 1.00 | 73.31 |
| ATOM | 980  | CG   | ARG | A | 68 | 22.781 | 9.639  | -6.621 | 1.00 | 3.14  |
| ATOM | 981  | CD   | ARG | A | 68 | 23.937 | 10.575 | -6.300 | 1.00 | 35.53 |
| ATOM | 982  | NE   | ARG | A | 68 | 23.803 | 11.861 | -6.978 | 1.00 | 5.12  |
| ATOM | 983  | CZ   | ARG | A | 68 | 24.737 | 12.806 | -6.951 | 1.00 | 31.11 |
| ATOM | 984  | NH1  | ARG | A | 68 | 25.865 | 12.609 | -6.284 | 1.00 | 24.24 |
| ATOM | 985  | NH2  | ARG | A | 68 | 24.542 | 13.951 | -7.593 | 1.00 | 64.31 |
| ATOM | 986  | H    | ARG | A | 68 | 19.553 | 8.529  | -5.027 | 1.00 | 22.24 |
| ATOM | 987  | HA   | ARG | A | 68 | 21.826 | 7.309  | -6.398 | 1.00 | 62.14 |
| ATOM | 988  | 2HB  | ARG | A | 68 | 21.301 | 9.864  | -5.116 | 1.00 | 41.15 |
| ATOM | 989  | 3HB  | ARG | A | 68 | 22.807 | 9.151  | -4.555 | 1.00 | 44.13 |
| ATOM | 990  | 2HG  | ARG | A | 68 | 23.164 | 8.783  | -7.156 | 1.00 | 23.33 |
| ATOM | 991  | 3HG  | ARG | A | 68 | 22.067 | 10.162 | -7.238 | 1.00 | 55.03 |
| ATOM | 992  | 2HD  | ARG | A | 68 | 23.961 | 10.742 | -5.233 | 1.00 | 65.42 |
| ATOM | 993  | 3HD  | ARG | A | 68 | 24.858 | 10.107 | -6.612 | 1.00 | 61.32 |
| ATOM | 994  | HE   | ARG | A | 68 | 22.977 | 12.028 | -7.477 | 1.00 | 23.21 |
| ATOM | 995  | 1HH1 | ARG | A | 68 | 26.015 | 11.747 | -5.800 | 1.00 | 20.23 |
| ATOM | 996  | 2HH1 | ARG | A | 68 | 26.567 | 13.321 | -6.266 | 1.00 | 2.41  |
| ATOM | 997  | 1HH2 | ARG | A | 68 | 23.693 | 14.103 | -8.097 | 1.00 | 60.24 |
| ATOM | 998  | 2HH2 | ARG | A | 68 | 25.245 | 14.661 | -7.572 | 1.00 | 42.12 |
| ATOM | 999  | N    | LEU | A | 69 | 22.552 | 5.780  | -4.604 | 1.00 | 62.55 |
| ATOM | 1000 | CA   | LEU | A | 69 | 23.017 | 4.864  | -3.568 | 1.00 | 73.11 |
| ATOM | 1001 | C    | LEU | A | 69 | 24.368 | 4.261  | -3.940 | 1.00 | 34.10 |
| ATOM | 1002 | O    | LEU | A | 69 | 24.584 | 3.849  | -5.080 | 1.00 | 74.42 |
| ATOM | 1003 | CB   | LEU | A | 69 | 21.992 | 3.750  | -3.347 | 1.00 | 53.21 |
| ATOM | 1004 | CG   | LEU | A | 69 | 20.945 | 3.573  | -4.448 | 1.00 | 23.01 |
| ATOM | 1005 | CD1  | LEU | A | 69 | 20.525 | 2.115  | -4.555 | 1.00 | 52.40 |
| ATOM | 1006 | CD2  | LEU | A | 69 | 19.738 | 4.460  | -4.184 | 1.00 | 14.35 |
| ATOM | 1007 | H    | LEU | A | 69 | 22.724 | 5.563  | -5.544 | 1.00 | 64.01 |
| ATOM | 1008 | HA   | LEU | A | 69 | 23.127 | 5.427  | -2.654 | 1.00 | 0.34  |
| ATOM | 1009 | 2HB  | LEU | A | 69 | 22.530 | 2.820  | -3.250 | 1.00 | 60.02 |
| ATOM | 1010 | 3HB  | LEU | A | 69 | 21.470 | 3.960  | -2.424 | 1.00 | 42.30 |
| ATOM | 1011 | HG   | LEU | A | 69 | 21.376 | 3.866  | -5.396 | 1.00 | 13.14 |
| ATOM | 1012 | 1HD1 | LEU | A | 69 | 20.603 | 1.646  | -3.586 | 1.00 | 42.12 |



|      |      |      |     |   |    |        |        |        |      |       |
|------|------|------|-----|---|----|--------|--------|--------|------|-------|
| ATOM | 1013 | 2HD1 | LEU | A | 69 | 21.170 | 1.605  | -5.255 | 1.00 | 55.44 |
| ATOM | 1014 | 3HD1 | LEU | A | 69 | 19.503 | 2.060  | -4.901 | 1.00 | 50.21 |
| ATOM | 1015 | 1HD2 | LEU | A | 69 | 19.556 | 4.513  | -3.120 | 1.00 | 71.42 |
| ATOM | 1016 | 2HD2 | LEU | A | 69 | 18.871 | 4.045  | -4.677 | 1.00 | 33.54 |
| ATOM | 1017 | 3HD2 | LEU | A | 69 | 19.929 | 5.452  | -4.566 | 1.00 | 30.23 |
| ATOM | 1018 | N    | THR | A | 70 | 25.275 | 4.210  | -2.969 | 1.00 | 53.23 |
| ATOM | 1019 | CA   | THR | A | 70 | 26.604 | 3.657  | -3.194 | 1.00 | 21.32 |
| ATOM | 1020 | C    | THR | A | 70 | 26.535 | 2.164  | -3.494 | 1.00 | 35.33 |
| ATOM | 1021 | O    | THR | A | 70 | 25.719 | 1.442  | -2.919 | 1.00 | 32.24 |
| ATOM | 1022 | CB   | THR | A | 70 | 27.519 | 3.882  | -1.976 | 1.00 | 24.15 |
| ATOM | 1023 | CG2  | THR | A | 70 | 28.866 | 4.444  | -2.407 | 1.00 | 32.32 |
| ATOM | 1024 | OG1  | THR | A | 70 | 26.895 | 4.782  | -1.053 | 1.00 | 72.51 |
| ATOM | 1025 | H    | THR | A | 70 | 25.043 | 4.555  | -2.082 | 1.00 | 30.43 |
| ATOM | 1026 | HA   | THR | A | 70 | 27.038 | 4.165  | -4.043 | 1.00 | 20.13 |
| ATOM | 1027 | HB   | THR | A | 70 | 27.682 | 2.932  | -1.486 | 1.00 | 42.23 |
| ATOM | 1028 | HG1  | THR | A | 70 | 27.498 | 4.967  | -0.329 | 1.00 | 15.11 |
| ATOM | 1029 | 1HG2 | THR | A | 70 | 28.732 | 5.075  | -3.273 | 1.00 | 31.30 |
| ATOM | 1030 | 2HG2 | THR | A | 70 | 29.533 | 3.631  | -2.653 | 1.00 | 32.13 |
| ATOM | 1031 | 3HG2 | THR | A | 70 | 29.288 | 5.025  | -1.601 | 1.00 | 33.44 |
| ATOM | 1032 | N    | LEU | A | 71 | 27.395 | 1.706  | -4.396 | 1.00 | 72.25 |
| ATOM | 1033 | CA   | LEU | A | 71 | 27.432 | 0.297  | -4.773 | 1.00 | 34.25 |
| ATOM | 1034 | C    | LEU | A | 71 | 27.806 | -0.576 | -3.579 | 1.00 | 12.22 |
| ATOM | 1035 | O    | LEU | A | 71 | 27.418 | -1.742 | -3.504 | 1.00 | 12.23 |
| ATOM | 1036 | CB   | LEU | A | 71 | 28.430 | 0.078  | -5.911 | 1.00 | 55.41 |
| ATOM | 1037 | CG   | LEU | A | 71 | 27.929 | 0.416  | -7.316 | 1.00 | 61.51 |
| ATOM | 1038 | CD1  | LEU | A | 71 | 26.814 | -0.534 | -7.728 | 1.00 | 3.53  |
| ATOM | 1039 | CD2  | LEU | A | 71 | 27.454 | 1.860  | -7.381 | 1.00 | 35.43 |
| ATOM | 1040 | H    | LEU | A | 71 | 28.020 | 2.329  | -4.821 | 1.00 | 24.14 |
| ATOM | 1041 | HA   | LEU | A | 71 | 26.445 | 0.018  | -5.111 | 1.00 | 52.52 |
| ATOM | 1042 | 2HB  | LEU | A | 71 | 29.296 | 0.691  | -5.713 | 1.00 | 71.53 |
| ATOM | 1043 | 3HB  | LEU | A | 71 | 28.717 | -0.963 | -5.902 | 1.00 | 62.43 |
| ATOM | 1044 | HG   | LEU | A | 71 | 28.743 | 0.299  | -8.019 | 1.00 | 34.31 |
| ATOM | 1045 | 1HD1 | LEU | A | 71 | 27.206 | -1.536 | -7.805 | 1.00 | 72.52 |
| ATOM | 1046 | 2HD1 | LEU | A | 71 | 26.416 | -0.228 | -8.684 | 1.00 | 11.42 |
| ATOM | 1047 | 3HD1 | LEU | A | 71 | 26.029 | -0.509 | -6.986 | 1.00 | 71.15 |
| ATOM | 1048 | 1HD2 | LEU | A | 71 | 27.133 | 2.088  | -8.386 | 1.00 | 73.24 |
| ATOM | 1049 | 2HD2 | LEU | A | 71 | 28.264 | 2.518  | -7.103 | 1.00 | 40.25 |
| ATOM | 1050 | 3HD2 | LEU | A | 71 | 26.628 | 1.997  | -6.699 | 1.00 | 14.41 |
| ATOM | 1051 | N    | ARG | A | 72 | 28.560 | -0.003 | -2.647 | 1.00 | 1.43  |
| ATOM | 1052 | CA   | ARG | A | 72 | 28.986 | -0.728 | -1.456 | 1.00 | 13.23 |
| ATOM | 1053 | C    | ARG | A | 72 | 27.781 | -1.222 | -0.661 | 1.00 | 32.24 |
| ATOM | 1054 | O    | ARG | A | 72 | 27.843 | -2.260 | -0.003 | 1.00 | 23.30 |
| ATOM | 1055 | CB   | ARG | A | 72 | 29.860 | 0.165  | -0.574 | 1.00 | 43.41 |
| ATOM | 1056 | CG   | ARG | A | 72 | 30.135 | -0.418 | 0.802  | 1.00 | 34.42 |
| ATOM | 1057 | CD   | ARG | A | 72 | 30.903 | -1.728 | 0.709  | 1.00 | 15.40 |
| ATOM | 1058 | NE   | ARG | A | 72 | 32.189 | -1.561 | 0.039  | 1.00 | 42.24 |
| ATOM | 1059 | CZ   | ARG | A | 72 | 32.989 | -2.573 | -0.278 | 1.00 | 43.35 |
| ATOM | 1060 | NH1  | ARG | A | 72 | 32.637 | -3.817 | 0.012  | 1.00 | 35.31 |
| ATOM | 1061 | NH2  | ARG | A | 72 | 34.145 | -2.341 | -0.888 | 1.00 | 52.40 |
| ATOM | 1062 | H    | ARG | A | 72 | 28.838 | 0.930  | -2.763 | 1.00 | 12.11 |
| ATOM | 1063 | HA   | ARG | A | 72 | 29.565 | -1.581 | -1.776 | 1.00 | 3.41  |
| ATOM | 1064 | 2HB  | ARG | A | 72 | 30.807 | 0.323  | -1.069 | 1.00 | 4.42  |
| ATOM | 1065 | 3HB  | ARG | A | 72 | 29.367 | 1.117  | -0.446 | 1.00 | 2.22  |
| ATOM | 1066 | 2HG  | ARG | A | 72 | 30.718 | 0.288  | 1.373  | 1.00 | 3.53  |
| ATOM | 1067 | 3HG  | ARG | A | 72 | 29.194 | -0.597 | 1.301  | 1.00 | 74.42 |
| ATOM | 1068 | 2HD  | ARG | A | 72 | 31.074 | -2.101 | 1.708  | 1.00 | 73.04 |
| ATOM | 1069 | 3HD  | ARG | A | 72 | 30.308 | -2.439 | 0.156  | 1.00 | 61.22 |
| ATOM | 1070 | HE   | ARG | A | 72 | 32.470 | -0.649 | -0.185 | 1.00 | 75.44 |
| ATOM | 1071 | 1HH1 | ARG | A | 72 | 31.766 | -3.995 | 0.470  | 1.00 | 31.24 |

|      |      |      |     |   |    |        |        |        |      |       |
|------|------|------|-----|---|----|--------|--------|--------|------|-------|
| ATOM | 1072 | 2HH1 | ARG | A | 72 | 33.240 | -4.578 | -0.229 | 1.00 | 3.42  |
| ATOM | 1073 | 1HH2 | ARG | A | 72 | 34.414 | -1.404 | -1.109 | 1.00 | 0.31  |
| ATOM | 1074 | 2HH2 | ARG | A | 72 | 34.746 | -3.103 | -1.126 | 1.00 | 42.40 |
| ATOM | 1075 | N    | GLU | A | 73 | 26.686 | -0.471 | -0.726 | 1.00 | 41.23 |
| ATOM | 1076 | CA   | GLU | A | 73 | 25.468 | -0.833 | -0.011 | 1.00 | 50.32 |
| ATOM | 1077 | C    | GLU | A | 73 | 24.864 | -2.114 | -0.578 | 1.00 | 64.45 |
| ATOM | 1078 | O    | GLU | A | 73 | 24.192 | -2.864 | 0.130  | 1.00 | 33.24 |
| ATOM | 1079 | CB   | GLU | A | 73 | 24.447 | 0.304  | -0.091 | 1.00 | 35.21 |
| ATOM | 1080 | CG   | GLU | A | 73 | 25.008 | 1.657  | 0.313  | 1.00 | 64.51 |
| ATOM | 1081 | CD   | GLU | A | 73 | 25.226 | 1.775  | 1.809  | 1.00 | 73.00 |
| ATOM | 1082 | OE1  | GLU | A | 73 | 24.985 | 0.779  | 2.523  | 1.00 | 13.34 |
| ATOM | 1083 | OE2  | GLU | A | 73 | 25.636 | 2.862  | 2.265  | 1.00 | 1.42  |
| ATOM | 1084 | H    | GLU | A | 73 | 26.698 | 0.346  | -1.268 | 1.00 | 22.13 |
| ATOM | 1085 | HA   | GLU | A | 73 | 25.728 | -0.999 | 1.023  | 1.00 | 13.33 |
| ATOM | 1086 | 2HB  | GLU | A | 73 | 24.084 | 0.376  | -1.106 | 1.00 | 21.52 |
| ATOM | 1087 | 3HB  | GLU | A | 73 | 23.618 | 0.073  | 0.562  | 1.00 | 72.40 |
| ATOM | 1088 | 2HG  | GLU | A | 73 | 25.955 | 1.802  | -0.185 | 1.00 | 42.12 |
| ATOM | 1089 | 3HG  | GLU | A | 73 | 24.317 | 2.426  | 0.002  | 1.00 | 4.42  |
| ATOM | 1090 | N    | LEU | A | 74 | 25.109 | -2.359 | -1.861 | 1.00 | 60.00 |
| ATOM | 1091 | CA   | LEU | A | 74 | 24.590 | -3.550 | -2.525 | 1.00 | 51.43 |
| ATOM | 1092 | C    | LEU | A | 74 | 25.592 | -4.697 | -2.448 | 1.00 | 10.01 |
| ATOM | 1093 | O    | LEU | A | 74 | 25.210 | -5.861 | -2.330 | 1.00 | 72.52 |
| ATOM | 1094 | CB   | LEU | A | 74 | 24.263 | -3.240 | -3.987 | 1.00 | 64.34 |
| ATOM | 1095 | CG   | LEU | A | 74 | 23.181 | -2.187 | -4.225 | 1.00 | 52.10 |
| ATOM | 1096 | CD1  | LEU | A | 74 | 23.745 | -0.788 | -4.030 | 1.00 | 30.23 |
| ATOM | 1097 | CD2  | LEU | A | 74 | 22.589 | -2.335 | -5.619 | 1.00 | 60.41 |
| ATOM | 1098 | H    | LEU | A | 74 | 25.651 | -1.725 | -2.374 | 1.00 | 64.02 |
| ATOM | 1099 | HA   | LEU | A | 74 | 23.684 | -3.844 | -2.017 | 1.00 | 52.00 |
| ATOM | 1100 | 2HB  | LEU | A | 74 | 25.169 | -2.896 | -4.463 | 1.00 | 20.42 |
| ATOM | 1101 | 3HB  | LEU | A | 74 | 23.940 | -4.160 | -4.455 | 1.00 | 2.32  |
| ATOM | 1102 | HG   | LEU | A | 74 | 22.385 | -2.329 | -3.506 | 1.00 | 44.32 |
| ATOM | 1103 | 1HD1 | LEU | A | 74 | 23.084 | -0.067 | -4.485 | 1.00 | 41.34 |
| ATOM | 1104 | 2HD1 | LEU | A | 74 | 24.720 | -0.726 | -4.491 | 1.00 | 15.42 |
| ATOM | 1105 | 3HD1 | LEU | A | 74 | 23.833 | -0.580 | -2.973 | 1.00 | 61.13 |
| ATOM | 1106 | 1HD2 | LEU | A | 74 | 21.882 | -1.538 | -5.796 | 1.00 | 72.51 |
| ATOM | 1107 | 2HD2 | LEU | A | 74 | 22.085 | -3.288 | -5.696 | 1.00 | 54.24 |
| ATOM | 1108 | 3HD2 | LEU | A | 74 | 23.380 | -2.285 | -6.353 | 1.00 | 35.21 |
| ATOM | 1109 | N    | TYR | A | 75 | 26.875 | -4.360 | -2.513 | 1.00 | 22.03 |
| ATOM | 1110 | CA   | TYR | A | 75 | 27.933 | -5.362 | -2.450 | 1.00 | 74.02 |
| ATOM | 1111 | C    | TYR | A | 75 | 28.104 | -5.885 | -1.027 | 1.00 | 43.22 |
| ATOM | 1112 | O    | TYR | A | 75 | 28.239 | -7.088 | -0.808 | 1.00 | 73.32 |
| ATOM | 1113 | CB   | TYR | A | 75 | 29.252 | -4.773 | -2.952 | 1.00 | 22.32 |
| ATOM | 1114 | CG   | TYR | A | 75 | 29.474 | -4.961 | -4.436 | 1.00 | 14.43 |
| ATOM | 1115 | CD1  | TYR | A | 75 | 29.704 | -3.871 | -5.267 | 1.00 | 14.24 |
| ATOM | 1116 | CD2  | TYR | A | 75 | 29.452 | -6.227 | -5.007 | 1.00 | 52.22 |
| ATOM | 1117 | CE1  | TYR | A | 75 | 29.906 | -4.037 | -6.623 | 1.00 | 52.11 |
| ATOM | 1118 | CE2  | TYR | A | 75 | 29.654 | -6.402 | -6.362 | 1.00 | 64.43 |
| ATOM | 1119 | CZ   | TYR | A | 75 | 29.881 | -5.305 | -7.166 | 1.00 | 53.41 |
| ATOM | 1120 | OH   | TYR | A | 75 | 30.082 | -5.475 | -8.517 | 1.00 | 35.33 |
| ATOM | 1121 | H    | TYR | A | 75 | 27.118 | -3.415 | -2.606 | 1.00 | 74.25 |
| ATOM | 1122 | HA   | TYR | A | 75 | 27.649 | -6.184 | -3.092 | 1.00 | 4.42  |
| ATOM | 1123 | 2HB  | TYR | A | 75 | 29.267 | -3.714 | -2.746 | 1.00 | 63.11 |
| ATOM | 1124 | 3HB  | TYR | A | 75 | 30.071 | -5.248 | -2.431 | 1.00 | 41.14 |
| ATOM | 1125 | HD1  | TYR | A | 75 | 29.723 | -2.879 | -4.838 | 1.00 | 73.03 |
| ATOM | 1126 | HD2  | TYR | A | 75 | 29.274 | -7.085 | -4.375 | 1.00 | 12.53 |
| ATOM | 1127 | HE1  | TYR | A | 75 | 30.083 | -3.178 | -7.253 | 1.00 | 3.41  |
| ATOM | 1128 | HE2  | TYR | A | 75 | 29.634 | -7.395 | -6.788 | 1.00 | 3.12  |
| ATOM | 1129 | HH   | TYR | A | 75 | 29.262 | -5.304 | -8.986 | 1.00 | 53.31 |
| ATOM | 1130 | N    | ALA | A | 76 | 28.098 | -4.970 | -0.063 | 1.00 | 71.11 |

|      |      |      |     |   |    |        |         |        |      |       |
|------|------|------|-----|---|----|--------|---------|--------|------|-------|
| ATOM | 1131 | CA   | ALA | A | 76 | 28.250 | -5.337  | 1.339  | 1.00 | 20.43 |
| ATOM | 1132 | C    | ALA | A | 76 | 27.077 | -6.187  | 1.815  | 1.00 | 75.24 |
| ATOM | 1133 | O    | ALA | A | 76 | 27.250 | -7.344  | 2.196  | 1.00 | 23.15 |
| ATOM | 1134 | CB   | ALA | A | 76 | 28.384 | -4.090  | 2.200  | 1.00 | 14.10 |
| ATOM | 1135 | H    | ALA | A | 76 | 27.987 | -4.026  | -0.301 | 1.00 | 31.14 |
| ATOM | 1136 | HA   | ALA | A | 76 | 29.160 | -5.912  | 1.437  | 1.00 | 2.41  |
| ATOM | 1137 | 1HB  | ALA | A | 76 | 28.729 | -4.369  | 3.185  | 1.00 | 11.41 |
| ATOM | 1138 | 2HB  | ALA | A | 76 | 29.094 | -3.414  | 1.747  | 1.00 | 73.51 |
| ATOM | 1139 | 3HB  | ALA | A | 76 | 27.423 | -3.603  | 2.279  | 1.00 | 21.24 |
| ATOM | 1140 | N    | ALA | A | 77 | 25.882 | -5.605  | 1.789  | 1.00 | 31.41 |
| ATOM | 1141 | CA   | ALA | A | 77 | 24.680 | -6.310  | 2.216  | 1.00 | 33.22 |
| ATOM | 1142 | C    | ALA | A | 77 | 23.736 | -6.548  | 1.042  | 1.00 | 64.20 |
| ATOM | 1143 | O    | ALA | A | 77 | 22.699 | -5.899  | 0.906  | 1.00 | 44.41 |
| ATOM | 1144 | CB   | ALA | A | 77 | 23.972 | -5.530  | 3.314  | 1.00 | 3.31  |
| ATOM | 1145 | H    | ALA | A | 77 | 25.807 | -4.681  | 1.474  | 1.00 | 4.31  |
| ATOM | 1146 | HA   | ALA | A | 77 | 24.980 | -7.265  | 2.623  | 1.00 | 35.24 |
| ATOM | 1147 | 1HB  | ALA | A | 77 | 23.684 | -4.559  | 2.936  | 1.00 | 23.33 |
| ATOM | 1148 | 2HB  | ALA | A | 77 | 23.092 | -6.070  | 3.629  | 1.00 | 10.44 |
| ATOM | 1149 | 3HB  | ALA | A | 77 | 24.639 | -5.406  | 4.154  | 1.00 | 3.41  |
| ATOM | 1150 | N    | PRO | A | 78 | 24.102 | -7.501  | 0.172  | 1.00 | 44.03 |
| ATOM | 1151 | CA   | PRO | A | 78 | 23.302 | -7.846  | -1.007 | 1.00 | 30.31 |
| ATOM | 1152 | C    | PRO | A | 78 | 21.999 | -8.547  | -0.638 | 1.00 | 12.33 |
| ATOM | 1153 | O    | PRO | A | 78 | 21.941 | -9.775  | -0.564 | 1.00 | 15.45 |
| ATOM | 1154 | CB   | PRO | A | 78 | 24.215 | -8.793  | -1.790 | 1.00 | 75.15 |
| ATOM | 1155 | CG   | PRO | A | 78 | 25.117 | -9.385  | -0.764 | 1.00 | 31.53 |
| ATOM | 1156 | CD   | PRO | A | 78 | 25.325 | -8.315  | 0.271  | 1.00 | 4.05  |
| ATOM | 1157 | HA   | PRO | A | 78 | 23.084 | -6.975  | -1.607 | 1.00 | 74.23 |
| ATOM | 1158 | 2HB  | PRO | A | 78 | 23.618 | -9.551  | -2.278 | 1.00 | 34.22 |
| ATOM | 1159 | 3HB  | PRO | A | 78 | 24.770 | -8.235  | -2.529 | 1.00 | 11.42 |
| ATOM | 1160 | 2HG  | PRO | A | 78 | 24.649 | -10.251 | -0.319 | 1.00 | 45.14 |
| ATOM | 1161 | 3HG  | PRO | A | 78 | 26.059 | -9.657  | -1.216 | 1.00 | 61.05 |
| ATOM | 1162 | 2HD  | PRO | A | 78 | 25.418 | -8.753  | 1.254  | 1.00 | 31.22 |
| ATOM | 1163 | 3HD  | PRO | A | 78 | 26.200 | -7.726  | 0.035  | 1.00 | 73.51 |
| ATOM | 1164 | N    | THR | A | 79 | 20.953 | -7.758  | -0.407 | 1.00 | 62.51 |
| ATOM | 1165 | CA   | THR | A | 79 | 19.651 | -8.303  | -0.045 | 1.00 | 52.00 |
| ATOM | 1166 | C    | THR | A | 79 | 18.546 | -7.274  | -0.256 | 1.00 | 45.51 |
| ATOM | 1167 | O    | THR | A | 79 | 18.703 | -6.101  | 0.086  | 1.00 | 43.41 |
| ATOM | 1168 | CB   | THR | A | 79 | 19.626 | -8.772  | 1.422  | 1.00 | 1.00  |
| ATOM | 1169 | CG2  | THR | A | 79 | 19.720 | -10.288 | 1.507  | 1.00 | 0.11  |
| ATOM | 1170 | OG1  | THR | A | 79 | 20.712 | -8.180  | 2.144  | 1.00 | 61.42 |
| ATOM | 1171 | H    | THR | A | 79 | 21.062 | -6.788  | -0.482 | 1.00 | 44.50 |
| ATOM | 1172 | HA   | THR | A | 79 | 19.459 | -9.158  | -0.678 | 1.00 | 11.54 |
| ATOM | 1173 | HB   | THR | A | 79 | 18.693 | -8.458  | 1.869  | 1.00 | 64.23 |
| ATOM | 1174 | HG1  | THR | A | 79 | 20.647 | -7.224  | 2.093  | 1.00 | 41.45 |
| ATOM | 1175 | 1HG2 | THR | A | 79 | 19.191 | -10.729 | 0.675  | 1.00 | 43.20 |
| ATOM | 1176 | 2HG2 | THR | A | 79 | 19.279 | -10.624 | 2.433  | 1.00 | 32.44 |
| ATOM | 1177 | 3HG2 | THR | A | 79 | 20.757 | -10.586 | 1.473  | 1.00 | 71.32 |
| ATOM | 1178 | N    | LEU | A | 80 | 17.429 | -7.719  | -0.821 | 1.00 | 4.44  |
| ATOM | 1179 | CA   | LEU | A | 80 | 16.297 | -6.835  | -1.077 | 1.00 | 21.22 |
| ATOM | 1180 | C    | LEU | A | 80 | 15.737 | -6.276  | 0.227  | 1.00 | 2.50  |
| ATOM | 1181 | O    | LEU | A | 80 | 15.426 | -5.089  | 0.322  | 1.00 | 40.35 |
| ATOM | 1182 | CB   | LEU | A | 80 | 15.201 | -7.586  | -1.835 | 1.00 | 51.43 |
| ATOM | 1183 | CG   | LEU | A | 80 | 15.612 | -8.201  | -3.173 | 1.00 | 73.43 |
| ATOM | 1184 | CD1  | LEU | A | 80 | 14.405 | -8.804  | -3.876 | 1.00 | 64.41 |
| ATOM | 1185 | CD2  | LEU | A | 80 | 16.280 | -7.159  | -4.057 | 1.00 | 42.34 |
| ATOM | 1186 | H    | LEU | A | 80 | 17.363 | -8.663  | -1.071 | 1.00 | 63.33 |
| ATOM | 1187 | HA   | LEU | A | 80 | 16.648 | -6.015  | -1.685 | 1.00 | 71.13 |
| ATOM | 1188 | 2HB  | LEU | A | 80 | 14.846 | -8.382  | -1.200 | 1.00 | 74.42 |
| ATOM | 1189 | 3HB  | LEU | A | 80 | 14.395 | -6.891  | -2.023 | 1.00 | 52.42 |

|      |      |      |     |   |    |        |        |        |      |       |
|------|------|------|-----|---|----|--------|--------|--------|------|-------|
| ATOM | 1190 | HG   | LEU | A | 80 | 16.324 | -8.995 | -2.994 | 1.00 | 32.13 |
| ATOM | 1191 | 1HD1 | LEU | A | 80 | 14.735 | -9.562 | -4.571 | 1.00 | 20.25 |
| ATOM | 1192 | 2HD1 | LEU | A | 80 | 13.877 | -8.030 | -4.412 | 1.00 | 71.12 |
| ATOM | 1193 | 3HD1 | LEU | A | 80 | 13.747 | -9.248 | -3.144 | 1.00 | 31.23 |
| ATOM | 1194 | 1HD2 | LEU | A | 80 | 15.567 | -6.386 | -4.304 | 1.00 | 2.34  |
| ATOM | 1195 | 2HD2 | LEU | A | 80 | 16.630 | -7.628 | -4.966 | 1.00 | 0.13  |
| ATOM | 1196 | 3HD2 | LEU | A | 80 | 17.116 | -6.723 | -3.531 | 1.00 | 64.31 |
| ATOM | 1197 | N    | ALA | A | 81 | 15.614 | -7.138 | 1.231  | 1.00 | 72.15 |
| ATOM | 1198 | CA   | ALA | A | 81 | 15.096 | -6.729 | 2.530  | 1.00 | 12.01 |
| ATOM | 1199 | C    | ALA | A | 81 | 15.741 | -5.427 | 2.993  | 1.00 | 31.12 |
| ATOM | 1200 | O    | ALA | A | 81 | 15.086 | -4.581 | 3.601  | 1.00 | 2.02  |
| ATOM | 1201 | CB   | ALA | A | 81 | 15.323 | -7.827 | 3.558  | 1.00 | 35.42 |
| ATOM | 1202 | H    | ALA | A | 81 | 15.879 | -8.071 | 1.094  | 1.00 | 72.31 |
| ATOM | 1203 | HA   | ALA | A | 81 | 14.031 | -6.576 | 2.432  | 1.00 | 74.12 |
| ATOM | 1204 | 1HB  | ALA | A | 81 | 15.880 | -8.634 | 3.105  | 1.00 | 60.23 |
| ATOM | 1205 | 2HB  | ALA | A | 81 | 15.879 | -7.429 | 4.393  | 1.00 | 24.32 |
| ATOM | 1206 | 3HB  | ALA | A | 81 | 14.369 | -8.198 | 3.904  | 1.00 | 25.34 |
| ATOM | 1207 | N    | ALA | A | 82 | 17.029 | -5.274 | 2.702  | 1.00 | 15.10 |
| ATOM | 1208 | CA   | ALA | A | 82 | 17.761 | -4.074 | 3.088  | 1.00 | 64.44 |
| ATOM | 1209 | C    | ALA | A | 82 | 17.690 | -3.012 | 1.996  | 1.00 | 72.54 |
| ATOM | 1210 | O    | ALA | A | 82 | 17.418 | -1.844 | 2.270  | 1.00 | 2.34  |
| ATOM | 1211 | CB   | ALA | A | 82 | 19.211 | -4.418 | 3.398  | 1.00 | 73.32 |
| ATOM | 1212 | H    | ALA | A | 82 | 17.496 | -5.984 | 2.215  | 1.00 | 2.11  |
| ATOM | 1213 | HA   | ALA | A | 82 | 17.310 | -3.682 | 3.987  | 1.00 | 33.05 |
| ATOM | 1214 | 1HB  | ALA | A | 82 | 19.765 | -3.508 | 3.577  | 1.00 | 21.53 |
| ATOM | 1215 | 2HB  | ALA | A | 82 | 19.252 | -5.045 | 4.276  | 1.00 | 12.43 |
| ATOM | 1216 | 3HB  | ALA | A | 82 | 19.643 | -4.944 | 2.560  | 1.00 | 71.03 |
| ATOM | 1217 | N    | TRP | A | 83 | 17.936 | -3.426 | 0.758  | 1.00 | 74.32 |
| ATOM | 1218 | CA   | TRP | A | 83 | 17.899 | -2.509 | -0.376 | 1.00 | 25.22 |
| ATOM | 1219 | C    | TRP | A | 83 | 16.594 | -1.721 | -0.397 | 1.00 | 63.53 |
| ATOM | 1220 | O    | TRP | A | 83 | 16.575 | -0.545 | -0.756 | 1.00 | 72.04 |
| ATOM | 1221 | CB   | TRP | A | 83 | 18.066 | -3.279 | -1.687 | 1.00 | 25.43 |
| ATOM | 1222 | CG   | TRP | A | 83 | 19.417 | -3.911 | -1.836 | 1.00 | 63.25 |
| ATOM | 1223 | CD1  | TRP | A | 83 | 20.403 | -3.970 | -0.894 | 1.00 | 25.44 |
| ATOM | 1224 | CD2  | TRP | A | 83 | 19.930 | -4.571 | -2.999 | 1.00 | 25.33 |
| ATOM | 1225 | CE2  | TRP | A | 83 | 21.234 | -5.007 | -2.689 | 1.00 | 32.01 |
| ATOM | 1226 | CE3  | TRP | A | 83 | 19.415 | -4.839 | -4.270 | 1.00 | 4.41  |
| ATOM | 1227 | NE1  | TRP | A | 83 | 21.499 | -4.628 | -1.400 | 1.00 | 10.42 |
| ATOM | 1228 | CZ2  | TRP | A | 83 | 22.026 | -5.693 | -3.605 | 1.00 | 64.12 |
| ATOM | 1229 | CZ3  | TRP | A | 83 | 20.203 | -5.519 | -5.178 | 1.00 | 64.33 |
| ATOM | 1230 | CH2  | TRP | A | 83 | 21.497 | -5.941 | -4.842 | 1.00 | 72.04 |
| ATOM | 1231 | H    | TRP | A | 83 | 18.146 | -4.371 | 0.602  | 1.00 | 4.10  |
| ATOM | 1232 | HA   | TRP | A | 83 | 18.722 | -1.818 | -0.268 | 1.00 | 1.32  |
| ATOM | 1233 | 2HB  | TRP | A | 83 | 17.325 | -4.063 | -1.734 | 1.00 | 1.23  |
| ATOM | 1234 | 3HB  | TRP | A | 83 | 17.921 | -2.601 | -2.515 | 1.00 | 2.00  |
| ATOM | 1235 | HD1  | TRP | A | 83 | 20.321 | -3.555 | 0.099  | 1.00 | 21.42 |
| ATOM | 1236 | HE1  | TRP | A | 83 | 22.334 | -4.798 | -0.915 | 1.00 | 31.20 |
| ATOM | 1237 | HE3  | TRP | A | 83 | 18.421 | -4.522 | -4.547 | 1.00 | 52.25 |
| ATOM | 1238 | HZ2  | TRP | A | 83 | 23.025 | -6.025 | -3.361 | 1.00 | 70.23 |
| ATOM | 1239 | HZ3  | TRP | A | 83 | 19.822 | -5.734 | -6.166 | 1.00 | 24.51 |
| ATOM | 1240 | HH2  | TRP | A | 83 | 22.077 | -6.469 | -5.583 | 1.00 | 73.34 |
| ATOM | 1241 | N    | ASN | A | 84 | 15.505 | -2.378 | -0.010 | 1.00 | 43.04 |
| ATOM | 1242 | CA   | ASN | A | 84 | 14.195 | -1.738 | 0.014  | 1.00 | 2.30  |
| ATOM | 1243 | C    | ASN | A | 84 | 14.257 | -0.401 | 0.746  | 1.00 | 53.40 |
| ATOM | 1244 | O    | ASN | A | 84 | 13.522 | 0.531  | 0.419  | 1.00 | 42.04 |
| ATOM | 1245 | CB   | ASN | A | 84 | 13.170 | -2.653 | 0.686  | 1.00 | 73.00 |
| ATOM | 1246 | CG   | ASN | A | 84 | 11.804 | -2.004 | 0.802  | 1.00 | 71.11 |
| ATOM | 1247 | ND2  | ASN | A | 84 | 10.841 | -2.512 | 0.041  | 1.00 | 44.23 |
| ATOM | 1248 | OD1  | ASN | A | 84 | 11.617 | -1.058 | 1.567  | 1.00 | 52.11 |

|      |      |      |     |   |    |        |        |        |      |       |
|------|------|------|-----|---|----|--------|--------|--------|------|-------|
| ATOM | 1249 | H    | ASN | A | 84 | 15.584 | -3.315 | 0.265  | 1.00 | 63.21 |
| ATOM | 1250 | HA   | ASN | A | 84 | 13.893 | -1.562 | -1.007 | 1.00 | 61.34 |
| ATOM | 1251 | 2HB  | ASN | A | 84 | 13.068 | -3.558 | 0.105  | 1.00 | 65.04 |
| ATOM | 1252 | 3HB  | ASN | A | 84 | 13.515 | -2.904 | 1.678  | 1.00 | 55.22 |
| ATOM | 1253 | 1HD2 | ASN | A | 84 | 11.063 | -3.266 | -0.545 | 1.00 | 10.12 |
| ATOM | 1254 | 2HD2 | ASN | A | 84 | 9.949  | -2.111 | 0.095  | 1.00 | 12.13 |
| ATOM | 1255 | N    | GLN | A | 85 | 15.138 | -0.315 | 1.737  | 1.00 | 1.31  |
| ATOM | 1256 | CA   | GLN | A | 85 | 15.295 | 0.908  | 2.515  | 1.00 | 2.43  |
| ATOM | 1257 | C    | GLN | A | 85 | 16.024 | 1.977  | 1.708  | 1.00 | 51.42 |
| ATOM | 1258 | O    | GLN | A | 85 | 15.685 | 3.160  | 1.775  | 1.00 | 25.13 |
| ATOM | 1259 | CB   | GLN | A | 85 | 16.059 | 0.620  | 3.809  | 1.00 | 40.31 |
| ATOM | 1260 | CG   | GLN | A | 85 | 15.346 | 1.111  | 5.059  | 1.00 | 42.45 |
| ATOM | 1261 | CD   | GLN | A | 85 | 15.239 | 0.042  | 6.127  | 1.00 | 35.24 |
| ATOM | 1262 | NE2  | GLN | A | 85 | 14.208 | -0.790 | 6.031  | 1.00 | 13.24 |
| ATOM | 1263 | OE1  | GLN | A | 85 | 16.073 | -0.036 | 7.030  | 1.00 | 74.51 |
| ATOM | 1264 | H    | GLN | A | 85 | 15.695 | -1.092 | 1.950  | 1.00 | 11.32 |
| ATOM | 1265 | HA   | GLN | A | 85 | 14.310 | 1.272  | 2.763  | 1.00 | 34.04 |
| ATOM | 1266 | 2HB  | GLN | A | 85 | 16.203 | -0.446 | 3.898  | 1.00 | 43.00 |
| ATOM | 1267 | 3HB  | GLN | A | 85 | 17.024 | 1.103  | 3.758  | 1.00 | 12.12 |
| ATOM | 1268 | 2HG  | GLN | A | 85 | 15.894 | 1.949  | 5.464  | 1.00 | 15.41 |
| ATOM | 1269 | 3HG  | GLN | A | 85 | 14.351 | 1.431  | 4.787  | 1.00 | 33.52 |
| ATOM | 1270 | 1HE2 | GLN | A | 85 | 13.584 | -0.668 | 5.285  | 1.00 | 74.42 |
| ATOM | 1271 | 2HE2 | GLN | A | 85 | 14.114 | -1.491 | 6.708  | 1.00 | 21.11 |
| ATOM | 1272 | N    | LEU | A | 86 | 17.026 | 1.555  | 0.945  | 1.00 | 72.13 |
| ATOM | 1273 | CA   | LEU | A | 86 | 17.803 | 2.476  | 0.124  | 1.00 | 45.34 |
| ATOM | 1274 | C    | LEU | A | 86 | 16.914 | 3.182  | -0.894 | 1.00 | 54.43 |
| ATOM | 1275 | O    | LEU | A | 86 | 17.280 | 4.225  | -1.435 | 1.00 | 55.43 |
| ATOM | 1276 | CB   | LEU | A | 86 | 18.926 | 1.726  | -0.596 | 1.00 | 55.34 |
| ATOM | 1277 | CG   | LEU | A | 86 | 20.200 | 1.487  | 0.214  | 1.00 | 61.34 |
| ATOM | 1278 | CD1  | LEU | A | 86 | 20.431 | -0.003 | 0.417  | 1.00 | 10.44 |
| ATOM | 1279 | CD2  | LEU | A | 86 | 21.398 | 2.124  | -0.475 | 1.00 | 53.54 |
| ATOM | 1280 | H    | LEU | A | 86 | 17.249 | 0.601  | 0.932  | 1.00 | 14.03 |
| ATOM | 1281 | HA   | LEU | A | 86 | 18.239 | 3.217  | 0.778  | 1.00 | 34.32 |
| ATOM | 1282 | 2HB  | LEU | A | 86 | 18.540 | 0.765  | -0.898 | 1.00 | 31.52 |
| ATOM | 1283 | 3HB  | LEU | A | 86 | 19.193 | 2.296  | -1.475 | 1.00 | 13.52 |
| ATOM | 1284 | HG   | LEU | A | 86 | 20.091 | 1.943  | 1.188  | 1.00 | 42.32 |
| ATOM | 1285 | 1HD1 | LEU | A | 86 | 20.581 | -0.478 | -0.540 | 1.00 | 54.00 |
| ATOM | 1286 | 2HD1 | LEU | A | 86 | 19.570 | -0.437 | 0.905  | 1.00 | 45.24 |
| ATOM | 1287 | 3HD1 | LEU | A | 86 | 21.306 | -0.150 | 1.034  | 1.00 | 34.10 |
| ATOM | 1288 | 1HD2 | LEU | A | 86 | 21.542 | 1.667  | -1.443 | 1.00 | 35.30 |
| ATOM | 1289 | 2HD2 | LEU | A | 86 | 22.282 | 1.976  | 0.128  | 1.00 | 35.51 |
| ATOM | 1290 | 3HD2 | LEU | A | 86 | 21.220 | 3.182  | -0.600 | 1.00 | 0.20  |
| ATOM | 1291 | N    | MET | A | 87 | 15.743 | 2.607  | -1.148 | 1.00 | 53.45 |
| ATOM | 1292 | CA   | MET | A | 87 | 14.799 | 3.184  | -2.099 | 1.00 | 51.10 |
| ATOM | 1293 | C    | MET | A | 87 | 14.255 | 4.514  | -1.586 | 1.00 | 62.15 |
| ATOM | 1294 | O    | MET | A | 87 | 14.508 | 5.567  | -2.173 | 1.00 | 4.12  |
| ATOM | 1295 | CB   | MET | A | 87 | 13.645 | 2.213  | -2.357 | 1.00 | 51.42 |
| ATOM | 1296 | CG   | MET | A | 87 | 14.045 | 0.998  | -3.178 | 1.00 | 40.20 |
| ATOM | 1297 | SD   | MET | A | 87 | 12.672 | -0.138 | -3.452 | 1.00 | 53.54 |
| ATOM | 1298 | CE   | MET | A | 87 | 12.431 | 0.043  | -5.218 | 1.00 | 71.21 |
| ATOM | 1299 | H    | MET | A | 87 | 15.507 | 1.776  | -0.686 | 1.00 | 13.33 |
| ATOM | 1300 | HA   | MET | A | 87 | 15.326 | 3.357  | -3.025 | 1.00 | 71.02 |
| ATOM | 1301 | 2HB  | MET | A | 87 | 13.260 | 1.870  | -1.409 | 1.00 | 23.43 |
| ATOM | 1302 | 3HB  | MET | A | 87 | 12.862 | 2.736  | -2.886 | 1.00 | 72.23 |
| ATOM | 1303 | 2HG  | MET | A | 87 | 14.413 | 1.333  | -4.137 | 1.00 | 22.45 |
| ATOM | 1304 | 3HG  | MET | A | 87 | 14.831 | 0.472  | -2.657 | 1.00 | 1.34  |
| ATOM | 1305 | 1HE  | MET | A | 87 | 11.382 | -0.064 | -5.451 | 1.00 | 71.43 |
| ATOM | 1306 | 2HE  | MET | A | 87 | 12.771 | 1.019  | -5.530 | 1.00 | 2.24  |
| ATOM | 1307 | 3HE  | MET | A | 87 | 12.995 | -0.718 | -5.737 | 1.00 | 72.55 |

|      |      |      |     |   |    |        |        |        |      |       |
|------|------|------|-----|---|----|--------|--------|--------|------|-------|
| ATOM | 1308 | N    | LEU | A | 88 | 13.507 | 4.459  | -0.490 | 1.00 | 61.21 |
| ATOM | 1309 | CA   | LEU | A | 88 | 12.927 | 5.660  | 0.101  | 1.00 | 21.45 |
| ATOM | 1310 | C    | LEU | A | 88 | 13.805 | 6.188  | 1.232  | 1.00 | 55.35 |
| ATOM | 1311 | O    | LEU | A | 88 | 14.149 | 7.370  | 1.262  | 1.00 | 24.54 |
| ATOM | 1312 | CB   | LEU | A | 88 | 11.521 | 5.365  | 0.627  | 1.00 | 21.13 |
| ATOM | 1313 | CG   | LEU | A | 88 | 10.908 | 4.033  | 0.194  | 1.00 | 21.32 |
| ATOM | 1314 | CD1  | LEU | A | 88 | 11.285 | 2.929  | 1.170  | 1.00 | 2.23  |
| ATOM | 1315 | CD2  | LEU | A | 88 | 9.395  | 4.153  | 0.081  | 1.00 | 4.41  |
| ATOM | 1316 | H    | LEU | A | 88 | 13.340 | 3.591  | -0.068 | 1.00 | 23.04 |
| ATOM | 1317 | HA   | LEU | A | 88 | 12.864 | 6.412  | -0.671 | 1.00 | 35.32 |
| ATOM | 1318 | 2HB  | LEU | A | 88 | 11.563 | 5.374  | 1.706  | 1.00 | 52.45 |
| ATOM | 1319 | 3HB  | LEU | A | 88 | 10.869 | 6.157  | 0.287  | 1.00 | 70.31 |
| ATOM | 1320 | HG   | LEU | A | 88 | 11.297 | 3.764  | -0.779 | 1.00 | 12.14 |
| ATOM | 1321 | 1HD1 | LEU | A | 88 | 10.429 | 2.679  | 1.779  | 1.00 | 44.12 |
| ATOM | 1322 | 2HD1 | LEU | A | 88 | 12.091 | 3.269  | 1.804  | 1.00 | 12.12 |
| ATOM | 1323 | 3HD1 | LEU | A | 88 | 11.604 | 2.056  | 0.620  | 1.00 | 24.14 |
| ATOM | 1324 | 1HD2 | LEU | A | 88 | 8.944  | 3.927  | 1.036  | 1.00 | 4.21  |
| ATOM | 1325 | 2HD2 | LEU | A | 88 | 9.033  | 3.457  | -0.662 | 1.00 | 4.23  |
| ATOM | 1326 | 3HD2 | LEU | A | 88 | 9.135  | 5.160  | -0.211 | 1.00 | 25.11 |
| ATOM | 1327 | N    | SER | A | 89 | 14.164 | 5.305  | 2.158  | 1.00 | 70.05 |
| ATOM | 1328 | CA   | SER | A | 89 | 15.000 | 5.683  | 3.291  | 1.00 | 63.13 |
| ATOM | 1329 | C    | SER | A | 89 | 16.373 | 6.154  | 2.820  | 1.00 | 53.44 |
| ATOM | 1330 | O    | SER | A | 89 | 17.029 | 6.954  | 3.487  | 1.00 | 42.12 |
| ATOM | 1331 | CB   | SER | A | 89 | 15.156 | 4.503  | 4.252  | 1.00 | 2.44  |
| ATOM | 1332 | OG   | SER | A | 89 | 15.407 | 4.952  | 5.573  | 1.00 | 34.11 |
| ATOM | 1333 | H    | SER | A | 89 | 13.857 | 4.377  | 2.078  | 1.00 | 50.54 |
| ATOM | 1334 | HA   | SER | A | 89 | 14.511 | 6.495  | 3.807  | 1.00 | 3.42  |
| ATOM | 1335 | 2HB  | SER | A | 89 | 14.249 | 3.918  | 4.250  | 1.00 | 65.11 |
| ATOM | 1336 | 3HB  | SER | A | 89 | 15.984 | 3.887  | 3.931  | 1.00 | 54.40 |
| ATOM | 1337 | HG   | SER | A | 89 | 14.749 | 5.607  | 5.819  | 1.00 | 44.10 |
| ATOM | 1338 | N    | ARG | A | 90 | 16.800 | 5.653  | 1.665  | 1.00 | 34.22 |
| ATOM | 1339 | CA   | ARG | A | 90 | 18.094 | 6.021  | 1.104  | 1.00 | 30.24 |
| ATOM | 1340 | C    | ARG | A | 90 | 19.198 | 5.885  | 2.149  | 1.00 | 32.51 |
| ATOM | 1341 | O    | ARG | A | 90 | 19.946 | 6.828  | 2.403  | 1.00 | 43.34 |
| ATOM | 1342 | CB   | ARG | A | 90 | 18.054 | 7.455  | 0.573  | 1.00 | 63.21 |
| ATOM | 1343 | CG   | ARG | A | 90 | 18.726 | 7.622  | -0.780 | 1.00 | 61.43 |
| ATOM | 1344 | CD   | ARG | A | 90 | 20.045 | 8.368  | -0.659 | 1.00 | 4.10  |
| ATOM | 1345 | NE   | ARG | A | 90 | 20.265 | 9.277  | -1.781 | 1.00 | 63.30 |
| ATOM | 1346 | CZ   | ARG | A | 90 | 19.619 | 10.427 | -1.933 | 1.00 | 13.13 |
| ATOM | 1347 | NH1  | ARG | A | 90 | 18.717 | 10.808 | -1.038 | 1.00 | 70.53 |
| ATOM | 1348 | NH2  | ARG | A | 90 | 19.874 | 11.200 | -2.981 | 1.00 | 21.13 |
| ATOM | 1349 | H    | ARG | A | 90 | 16.231 | 5.019  | 1.179  | 1.00 | 11.44 |
| ATOM | 1350 | HA   | ARG | A | 90 | 18.304 | 5.349  | 0.286  | 1.00 | 63.30 |
| ATOM | 1351 | 2HB  | ARG | A | 90 | 17.023 | 7.763  | 0.479  | 1.00 | 44.24 |
| ATOM | 1352 | 3HB  | ARG | A | 90 | 18.552 | 8.101  | 1.280  | 1.00 | 51.53 |
| ATOM | 1353 | 2HG  | ARG | A | 90 | 18.915 | 6.645  | -1.201 | 1.00 | 24.02 |
| ATOM | 1354 | 3HG  | ARG | A | 90 | 18.068 | 8.175  | -1.433 | 1.00 | 15.34 |
| ATOM | 1355 | 2HD  | ARG | A | 90 | 20.038 | 8.939  | 0.258  | 1.00 | 71.24 |
| ATOM | 1356 | 3HD  | ARG | A | 90 | 20.849 | 7.648  | -0.628 | 1.00 | 23.13 |
| ATOM | 1357 | HE   | ARG | A | 90 | 20.927 | 9.015  | -2.454 | 1.00 | 5.12  |
| ATOM | 1358 | 1HH1 | ARG | A | 90 | 18.523 | 10.228 | -0.247 | 1.00 | 63.31 |
| ATOM | 1359 | 2HH1 | ARG | A | 90 | 18.232 | 11.675 | -1.154 | 1.00 | 63.12 |
| ATOM | 1360 | 1HH2 | ARG | A | 90 | 20.553 | 10.917 | -3.657 | 1.00 | 24.41 |
| ATOM | 1361 | 2HH2 | ARG | A | 90 | 19.387 | 12.065 | -3.094 | 1.00 | 40.30 |
| ATOM | 1362 | N    | SER | A | 91 | 19.292 | 4.704  | 2.752  | 1.00 | 20.23 |
| ATOM | 1363 | CA   | SER | A | 91 | 20.301 | 4.445  | 3.773  | 1.00 | 42.23 |
| ATOM | 1364 | C    | SER | A | 91 | 20.214 | 5.474  | 4.896  | 1.00 | 30.21 |
| ATOM | 1365 | O    | SER | A | 91 | 20.967 | 6.446  | 4.942  | 1.00 | 43.54 |
| ATOM | 1366 | CB   | SER | A | 91 | 21.700 | 4.467  | 3.154  | 1.00 | 60.34 |

|        |      |     |     |   |    |        |       |        |      |       |
|--------|------|-----|-----|---|----|--------|-------|--------|------|-------|
| ATOM   | 1367 | OG  | SER | A | 91 | 22.602 | 3.670 | 3.903  | 1.00 | 54.42 |
| ATOM   | 1368 | H   | SER | A | 91 | 18.666 | 3.991 | 2.507  | 1.00 | 70.42 |
| ATOM   | 1369 | HA  | SER | A | 91 | 20.114 | 3.464 | 4.183  | 1.00 | 15.22 |
| ATOM   | 1370 | 2HB | SER | A | 91 | 21.651 | 4.082 | 2.146  | 1.00 | 0.42  |
| ATOM   | 1371 | 3HB | SER | A | 91 | 22.066 | 5.483 | 3.134  | 1.00 | 63.00 |
| ATOM   | 1372 | HG  | SER | A | 91 | 22.118 | 2.971 | 4.348  | 1.00 | 74.02 |
| ATOM   | 1373 | N   | PRO | A | 92 | 19.272 | 5.255 | 5.826  | 1.00 | 50.15 |
| ATOM   | 1374 | CA  | PRO | A | 92 | 19.063 | 6.151 | 6.967  | 1.00 | 51.12 |
| ATOM   | 1375 | C   | PRO | A | 92 | 20.208 | 6.087 | 7.972  | 1.00 | 62.15 |
| ATOM   | 1376 | O   | PRO | A | 92 | 20.518 | 7.075 | 8.637  | 1.00 | 75.32 |
| ATOM   | 1377 | CB  | PRO | A | 92 | 17.769 | 5.628 | 7.596  | 1.00 | 24.12 |
| ATOM   | 1378 | CG  | PRO | A | 92 | 17.706 | 4.194 | 7.196  | 1.00 | 4.22  |
| ATOM   | 1379 | CD  | PRO | A | 92 | 18.339 | 4.116 | 5.834  | 1.00 | 13.12 |
| ATOM   | 1380 | HA  | PRO | A | 92 | 18.922 | 7.174 | 6.648  | 1.00 | 62.51 |
| ATOM   | 1381 | 2HB | PRO | A | 92 | 17.819 | 5.737 | 8.670  | 1.00 | 11.45 |
| ATOM   | 1382 | 3HB | PRO | A | 92 | 16.927 | 6.182 | 7.211  | 1.00 | 42.44 |
| ATOM   | 1383 | 2HG | PRO | A | 92 | 18.259 | 3.592 | 7.901  | 1.00 | 34.42 |
| ATOM   | 1384 | 3HG | PRO | A | 92 | 16.677 | 3.871 | 7.150  | 1.00 | 12.30 |
| ATOM   | 1385 | 2HD | PRO | A | 92 | 18.869 | 3.182 | 5.717  | 1.00 | 13.41 |
| ATOM   | 1386 | 3HD | PRO | A | 92 | 17.590 | 4.226 | 5.064  | 1.00 | 51.33 |
| ATOM   | 1387 | N   | GLU | A | 93 | 20.834 | 4.918 | 8.075  | 1.00 | 15.44 |
| ATOM   | 1388 | CA  | GLU | A | 93 | 21.945 | 4.727 | 9.000  | 1.00 | 33.01 |
| ATOM   | 1389 | C   | GLU | A | 93 | 22.711 | 3.449 | 8.672  | 1.00 | 23.13 |
| ATOM   | 1390 | O   | GLU | A | 93 | 23.858 | 3.278 | 9.085  | 1.00 | 12.31 |
| ATOM   | 1391 | CB  | GLU | A | 93 | 21.434 | 4.673 | 10.442 | 1.00 | 42.15 |
| ATOM   | 1392 | CG  | GLU | A | 93 | 22.059 | 5.720 | 11.348 | 1.00 | 54.50 |
| ATOM   | 1393 | CD  | GLU | A | 93 | 23.362 | 5.254 | 11.966 | 1.00 | 3.35  |
| ATOM   | 1394 | OE1 | GLU | A | 93 | 24.404 | 5.890 | 11.702 | 1.00 | 64.33 |
| ATOM   | 1395 | OE2 | GLU | A | 93 | 23.341 | 4.255 | 12.714 | 1.00 | 32.25 |
| ATOM   | 1396 | H   | GLU | A | 93 | 20.541 | 4.168 | 7.518  | 1.00 | 75.32 |
| ATOM   | 1397 | HA  | GLU | A | 93 | 22.612 | 5.569 | 8.896  | 1.00 | 52.23 |
| ATOM   | 1398 | 2HB | GLU | A | 93 | 20.364 | 4.821 | 10.438 | 1.00 | 43.13 |
| ATOM   | 1399 | 3HB | GLU | A | 93 | 21.652 | 3.698 | 10.851 | 1.00 | 73.41 |
| ATOM   | 1400 | 2HG | GLU | A | 93 | 22.251 | 6.611 | 10.769 | 1.00 | 63.15 |
| ATOM   | 1401 | 3HG | GLU | A | 93 | 21.363 | 5.952 | 12.141 | 1.00 | 3.23  |
| TER    | 1402 |     | GLU | A | 93 |        |       |        |      |       |
| ENDMDL |      |     |     |   |    |        |       |        |      |       |
| END    |      |     |     |   |    |        |       |        |      |       |
